# Supplementary material for: Sex-Specific Regulation of Gene Expression Networks by Surfactant Protein A (SP-A) Variants in Alveolar Macrophages in Response to Klebsiella pneumoniae
Source: PubMed Central journal article supplement (PMC7326812; doi:10.3389/fimmu.2020.01290), 2020-06-24
Supplement: Image_1.pdf [file Image_1.pdf]

# Supplementary Figure 1

**A**

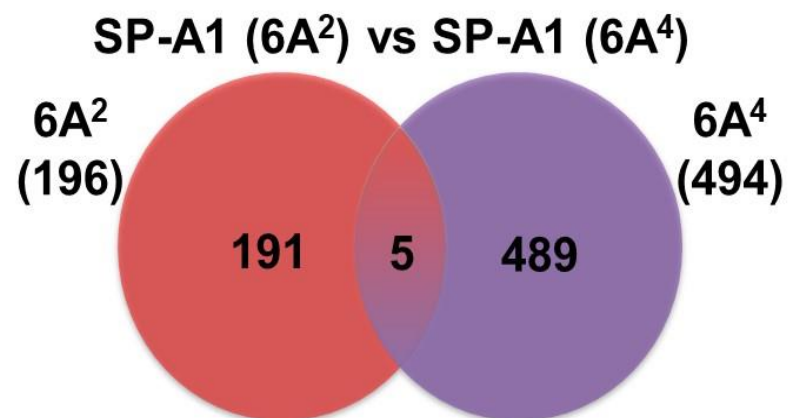

**B**

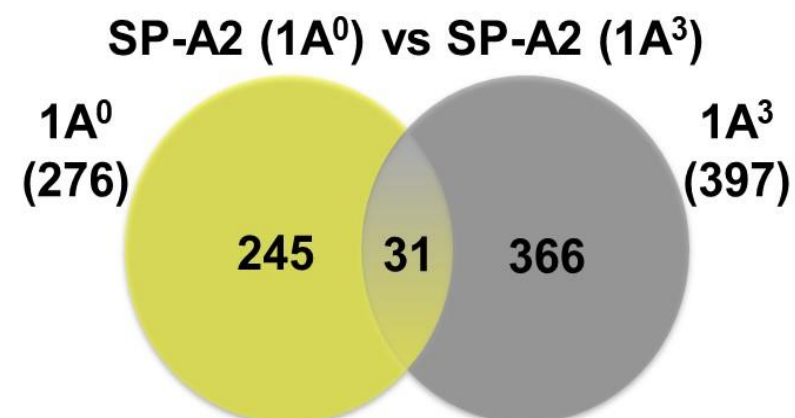

**C**

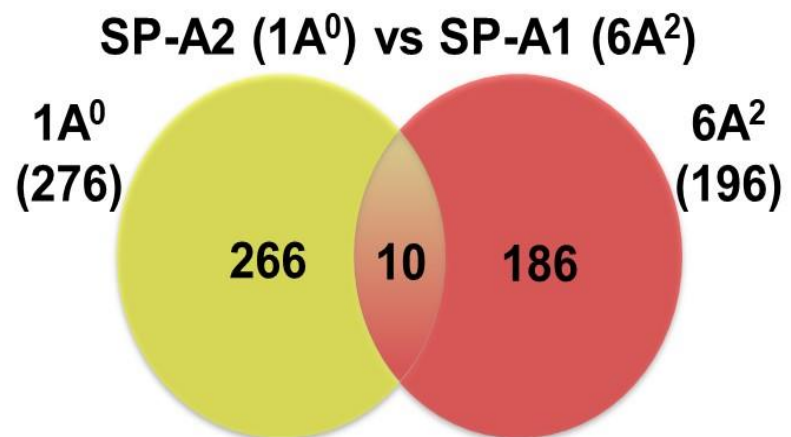

**D**

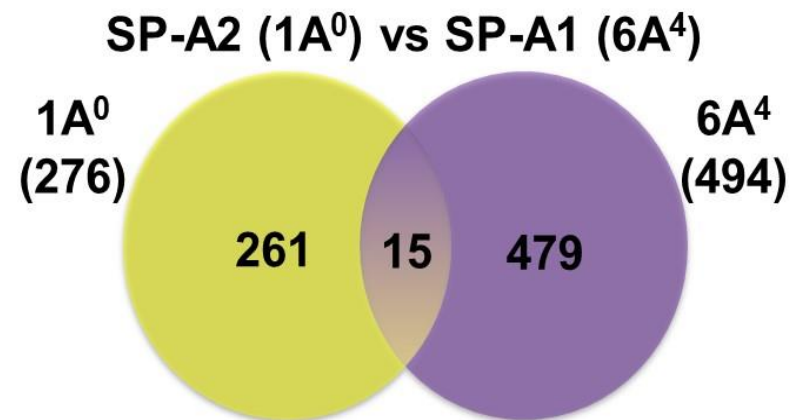

# Supplementary Figure 1

E

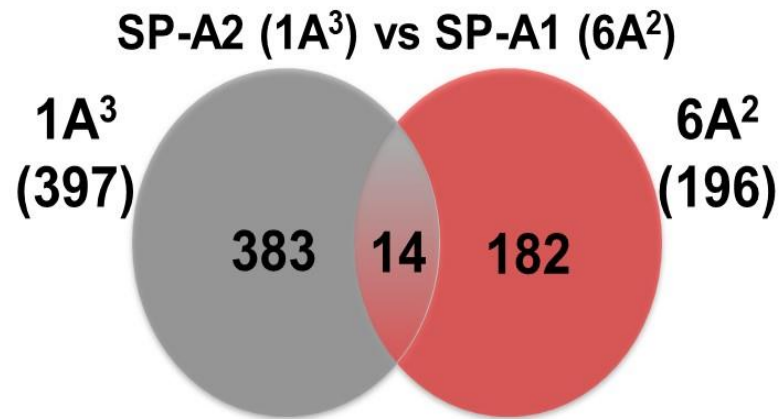

F

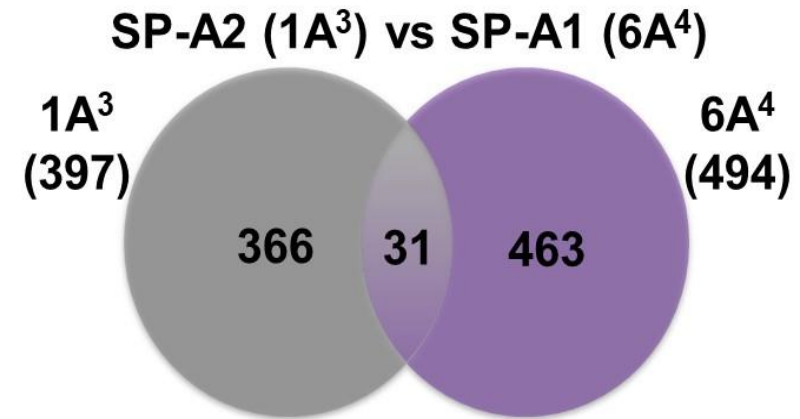

In all panels males and females are combined.
