# Supplementary material for: Sex-Specific Regulation of Gene Expression Networks by Surfactant Protein A (SP-A) Variants in Alveolar Macrophages in Response to Klebsiella pneumoniae
Source: PubMed Central journal article supplement (PMC7326812; doi:10.3389/fimmu.2020.01290), 2020-06-24

SP-A1 (6A<sup>2</sup>)

Males

Females

Cell cycle signaling node-1

TP-53 node

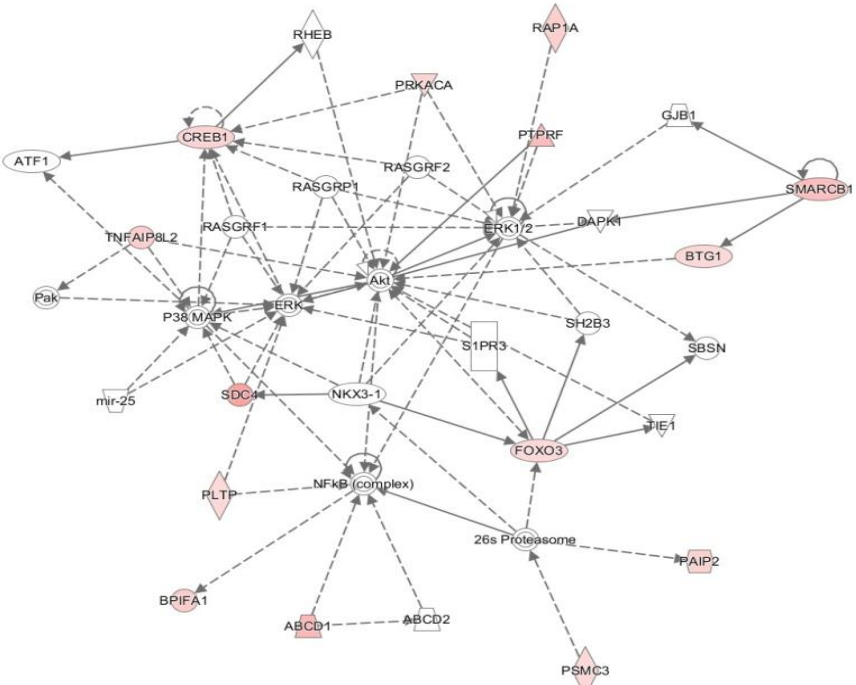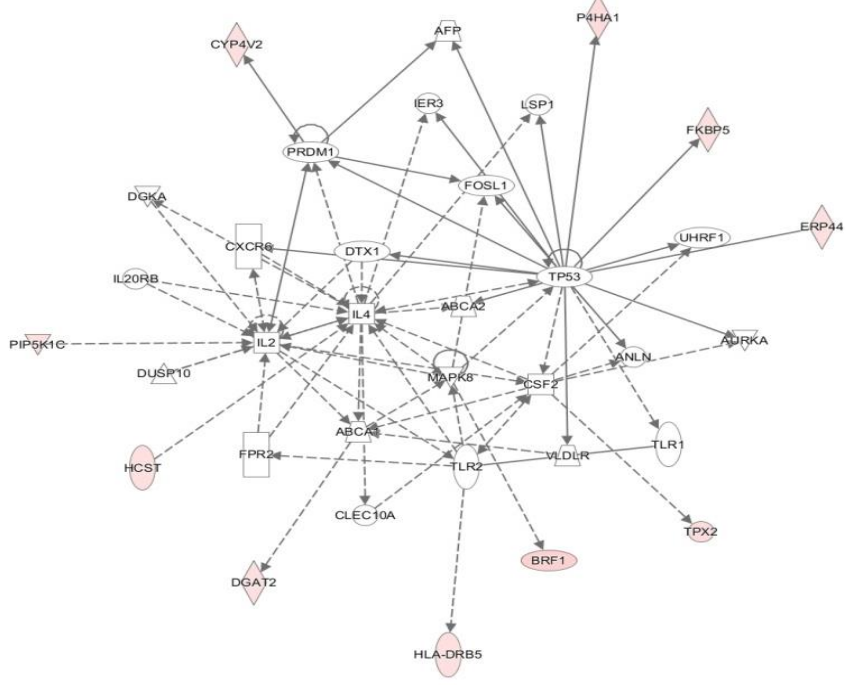

Cell cycle signaling node-2

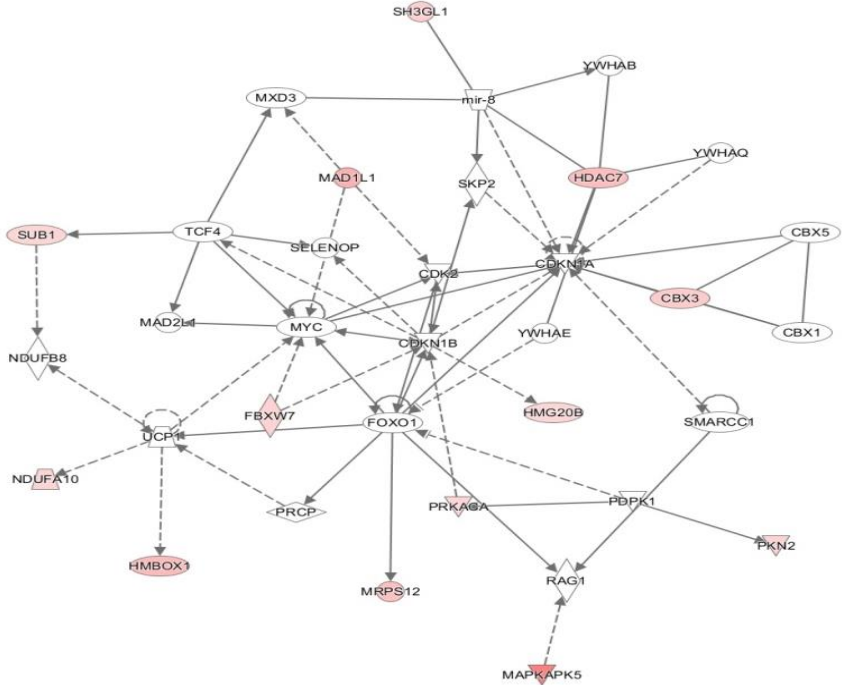

TP-53 node

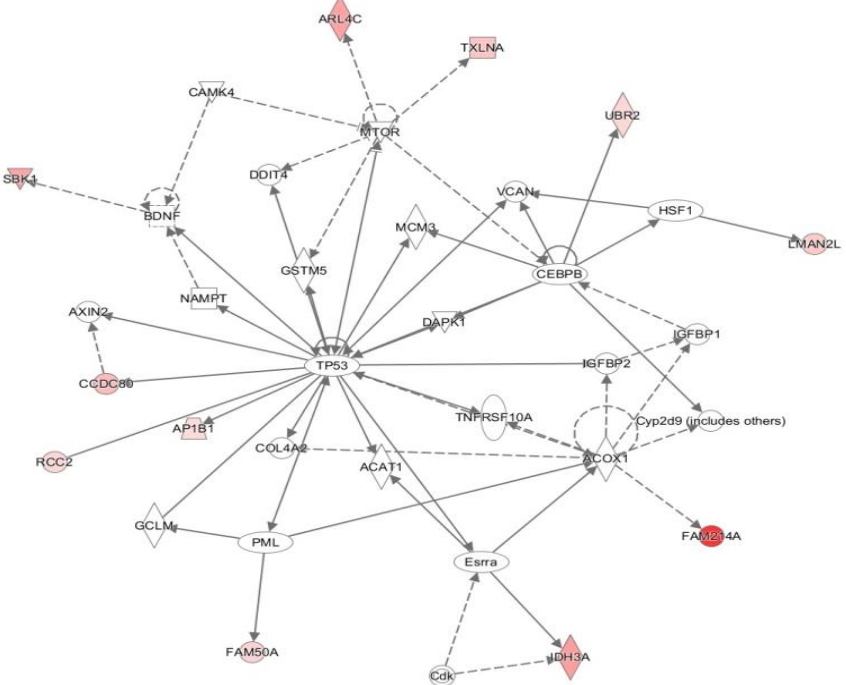



KO

Males

Females

TNF node

TP-53 node

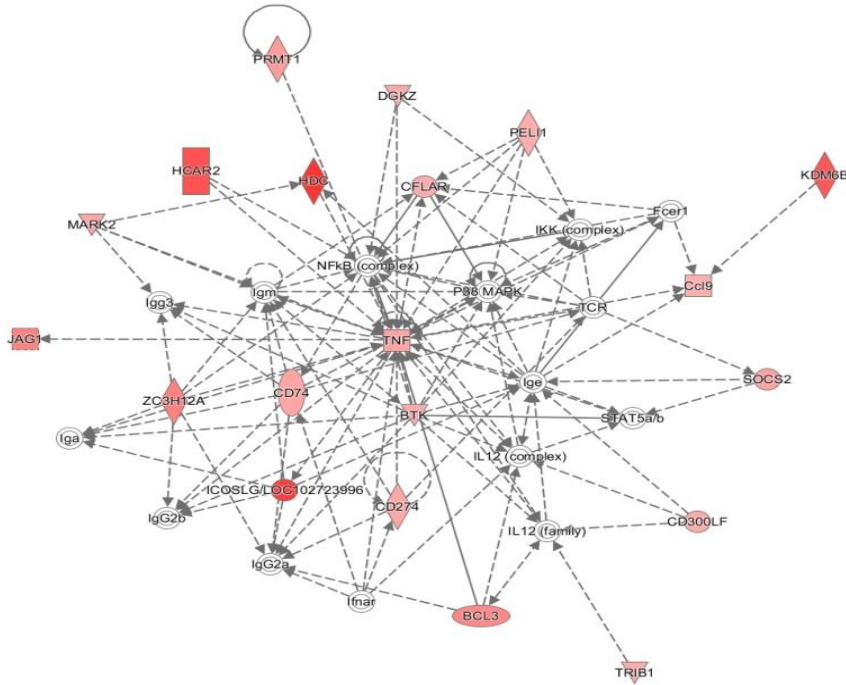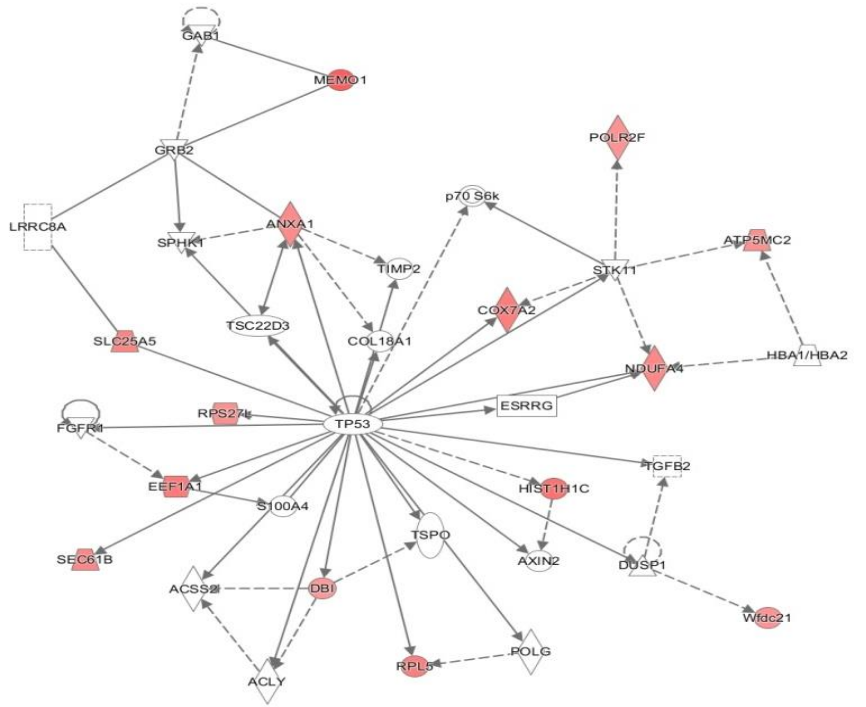

Cell cycle signaling node

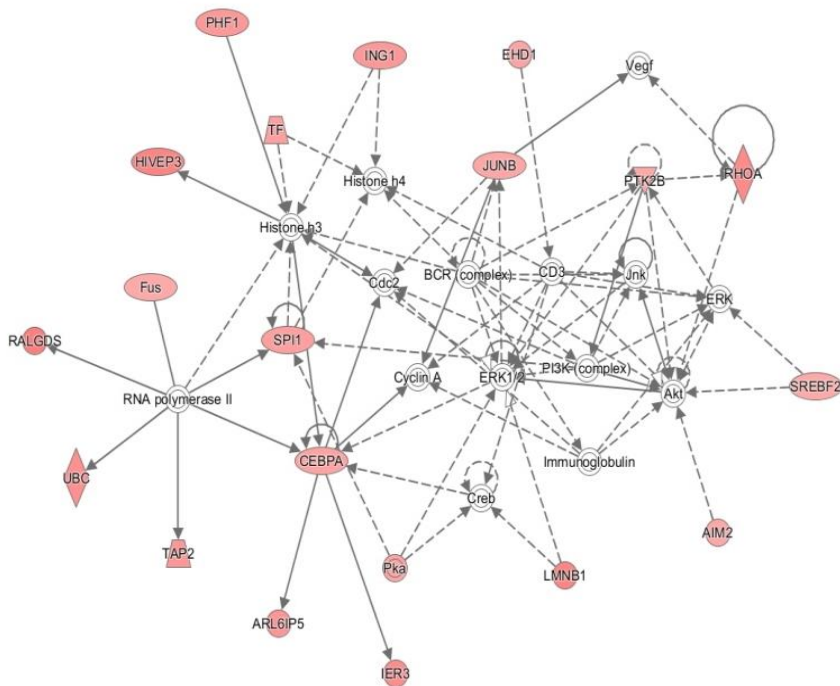

TP-53 node

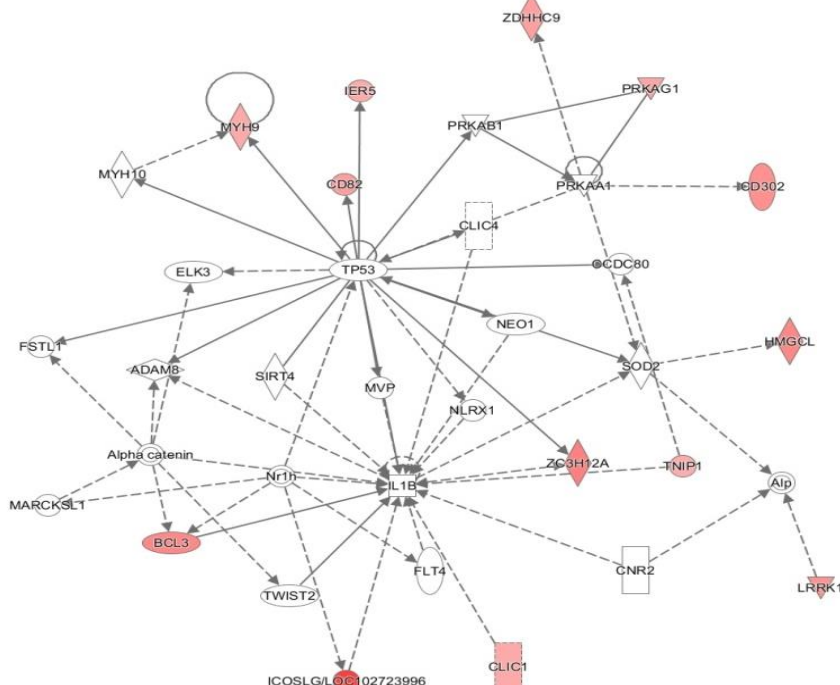

Supplement: Image_3.pdf [file Image_3.pdf]
