# Supplementary material for: Sex-Specific Regulation of Gene Expression Networks by Surfactant Protein A (SP-A) Variants in Alveolar Macrophages in Response to Klebsiella pneumoniae
Source: Front Immunol. 2020 Jun 24;11:1290. doi: 10.3389/fimmu.2020.01290 (PMC7326812; doi:10.3389/fimmu.2020.01290)
Supplement: Supplementary File 3 — Comparison of genes from AMs of SP-A2 (1A0), SP-A2 (1A3), SP-A1 (6A2), SP-A1 (6A4), and KO males and females in response to K. pneumoniae infection after 6 h. [file Table_3.XLSX]

## Sheet: 1A0 M vs 1A3 M
1A0-Males					1A3-Males						common genes between 1A0 vs 1A3
	average	average	fold			average	average	fold			1A0 Male					1A3 male
Associated.Gene.Name	male	Female	m/f		Associated_Gene_Name	male	Female	m/f			Associated_Gene_Name	male	Female	m/f		Associated_Gene_Name	male	Female	m/f
Itgam	258.132	25.8395	9.98984		Xist	788.545	1075.06	0.733489			Marcks	260.291	45.2995	5.746		Marcks	25.1013	178.102	0.140937
Lcn2	302.531	62.8187	4.81593		Mfge8	29.7752	627.277	0.0474675			Hcar2	1364.44	347.572	3.92563		Hcar2	189.137	370.668	0.51026
Rsad2	204.589	36.9308	5.5398		Agpat1	42.2325	116.626	0.362121			Mmp8	370.583	63.4351	5.84192		Mmp8	42.9562	126.708	0.339018
Inhba	111.759	11.7597	9.50356		Zfp36	89.9068	447.543	0.20089			Cd52	560.831	233.463	2.40223		Cd52	530.42	783.841	0.676694
Marcks	260.291	45.2995	5.746		Trem2	30.6412	100.475	0.304965			Ets2	484.62	117.346	4.12985		Ets2	49.3503	136.163	0.362434
Kdm7a	169.83	46.7496	3.63276		Mmp12	6.08475	328.624	0.0185158			Zfp36	309.084	61.2735	5.04433		Zfp36	89.9068	447.543	0.20089
Nfkbiz	164.888	22.3972	7.362		Tap1	37.4625	113.152	0.331082			Il1b	2913.01	410.33	7.09918		Il1b	96.2858	518.218	0.185802
Tnip1	302.668	113.968	2.65573		Bpgm	170.264	28.9962	5.87193			Ptafr	237.274	61.354	3.8673		Ptafr	38.2692	100.177	0.382017
Btg2	107.575	26.8232	4.0105		Plxnd1	61.521	157.115	0.391565			Grina	825.792	277.98	2.97069		Grina	325.745	542.865	0.600048
Hcar2	1364.44	347.572	3.92563		Manf	150.504	378.147	0.398005			Btg1	773.377	282.943	2.73333		Btg1	93.855	150.157	0.625046
Mmp8	370.583	63.4351	5.84192		AA467197	66.971	523.491	0.127932			Junb	1261.14	435.06	2.89876		Junb	132.399	286.716	0.461778
Ptger4	10.4855	50.068	0.209425		Kdm5c	52.9733	106.303	0.498322			Hba-a1	1814.53	188.892	9.60617		Hba-a1	13144.8	942.052	13.9534	Any process that results in a change in state or activity of a cell or an organism (in terms of movement, secretion, enzyme production, gene expression, etc.) as a result of a stimulus from a bacterium
Cd52	560.831	233.463	2.40223		Tmx1	192.19	127.505	1.50731			Bub1b	20.5781	63.3844	0.324656		Bub1b	114.471	83.8202	1.36567
S100a6	1071.06	246.121	4.35176		Lgmn	39.3695	108.172	0.363952			C3	261.232	101.747	2.56746		C3	110.783	264.017	0.419607
Mir142hg	182.74	52.1853	3.50175		Angptl4	204.242	96.839	2.10908			Slco2b1	15.6849	54.7129	0.286677		Slco2b1	103.369	67.4043	1.53357
Gadd45b	135.944	24.0876	5.64373		Spp1	53.2658	160.678	0.331507			Irg1	650.094	91.4471	7.10897		Irg1	19.6625	142.014	0.138454
Ets2	484.62	117.346	4.12985		Ldlr	126.979	270.607	0.469237			Cdh1	89.7833	180.915	0.496273		Cdh1	288.07	573.565	0.502244
Zfp36	309.084	61.2735	5.04433		S100a1	319.43	656.503	0.486563			Dgat1	193.256	55.567	3.47789		Dgat1	88.4432	207.087	0.427083
Bcl2l11	352.694	110.59	3.18922		Cox7a2l	77.3483	164.557	0.47004			Neurl1b	200.432	400.998	0.499834		Neurl1b	163.512	116.337	1.40551
Ppp1r3b	151.962	32.3798	4.69311		Gpnmb	854.082	1650.35	0.517514			Gdf15	181.357	95.456	1.8999		Gdf15	78.4617	214.124	0.366431
Acp2	212.692	88.8966	2.39257		Nars	170.495	110.434	1.54387			Ncor2	66.8229	144.529	0.462348		Ncor2	154.512	101.028	1.5294
Ifitm2	105.393	18.4067	5.72581		Bhlhe40	82.9235	187.947	0.441208			Tap1	215.976	30.6554	7.0453		Tap1	37.4625	113.152	0.331082
Ccdc88b	54.175	13.9439	3.88522		Fam220a	132.891	39.1833	3.39153			Fcgr3	505.178	247.352	2.04235		Fcgr3	372.83	591.772	0.630023
Snx18	118.163	33.8883	3.48685		Lipf	138.55	25.7115	5.38864			Krt79	445.729	761.583	0.585266		Krt79	1429.03	958.604	1.49074
Lst1	61.7061	8.06127	7.65464		Hba-a1	13144.8	942.052	13.9534			S100a8	7336.92	835.232	8.78429		S100a8	128.647	914.904	0.140613
Nfe2l2	367.539	137.892	2.66541		Foxk1	69.759	144.019	0.484374			Gga1	90.5625	45.8936	1.97331		Gga1	87.7083	149.023	0.588553
Cd97	123.603	24.8568	4.9726		Herpud1	151.73	288.232	0.526415			Hba-a2	649.794	85.7135	7.581		Hba-a2	9315.65	719.827	12.9415
Dnah12	14.4693	111.858	0.129355		C3	110.783	264.017	0.419607			S100a9	4684.37	471.43	9.93651		S100a9	100.38	885.588	0.113348
Cxcr4	96.0983	20.981	4.58025		Il11ra1	74.958	165.258	0.453582			Slc7a11	348.761	149.716	2.32948		Slc7a11	52.6385	191.387	0.275038
Cd14	207.586	45.3932	4.57306		Lrg1	30.5647	211.008	0.144851			Vimp	57.4948	121.673	0.472536		Vimp	123.428	186.321	0.662449
Sh2b2	358.093	134.259	2.66719		Rnase2a	1.4085	152.51	0.00923549			Ier3	1641.09	348.88	4.70389		Ier3	95.0555	440.169	0.215952
Rif1	30.8011	92.2838	0.333764		Hba-a2	9315.65	719.827	12.9415
Il1b	2913.01	410.33	7.09918		Dpp3	135.225	90.9273	1.48718			common	31
Tnf	107.443	29.937	3.58897		Mmp8	42.9562	126.708	0.339018			up regulated in both	2	yellow background
Ptafr	237.274	61.354	3.8673		Rpl36	185.954	108.534	1.71333			1A0 up-1A3 down	20	black
Rab44	135.693	41.7891	3.24708		Ccl17	44.0175	220.125	0.199966			1A0=1A3	9	green
Snap23	160.145	56.532	2.83281		Marcks	25.1013	178.102	0.140937			1A0 down-1A3 up	0
Mcfd2	2.09125	21.2625	0.0983542		Gins2	104.465	61.6665	1.69402
Usp46	2.81483	23.5415	0.119569		Hbb-bs	46650.7	3655.26	12.7626
Rtp4	56.1175	9.00441	6.23222		Aprt	330.608	231.024	1.43106
Samd9l	53.6605	10.7133	5.00877		2310036O22Rik	178.597	321.485	0.555536
H2-Ab1	407.535	102.574	3.97309		Glg1	243.889	157.425	1.54924
Dgat2	104.418	26.7162	3.90841		Gdf15	78.4617	214.124	0.366431
Ifi203	75.2555	21.1673	3.55526		Mcm3	125.595	72.0913	1.74217
Nlrp3	188.882	41.1966	4.5849		Mkrn1	255.694	137.155	1.86427
Ccl5	101.664	16.858	6.03057		Myl6	498.7	321.693	1.55023
Grina	825.792	277.98	2.97069		Ybx1	186.633	396.106	0.47117
Gbp2	99.6875	16.0439	6.21343		Tmem216	155.115	95.5675	1.62309
Btg1	773.377	282.943	2.73333		Cd93	38.278	121.77	0.314345
Fkbp15	78.3216	29.6039	2.64565		Serp1	241.579	415.224	0.581804
Glul	262.438	596.79	0.439749		Cdk11b	63.758	117.765	0.541401
Smox	171.405	31.926	5.36882		Fam46c	116.129	21.2907	5.45446
Nudt4	93.3096	27.2534	3.42377		Rilpl2	52	117.771	0.441536
Rasgrp2	61.6833	10.3172	5.97867		Xdh	52.908	111.557	0.474268
Cxcl1	45.6576	10.9001	4.18873		Clec4b1	123.127	70.6895	1.7418
Igf1r	65.693	16.1407	4.07001		Wfdc17	52.2218	192.075	0.271882
Ggct	71.497	19.3018	3.70416		Fam89a	187.211	105.703	1.77111
Junb	1261.14	435.06	2.89876		Igf1	37.096	108.822	0.340889
Slc25a37	101.465	29.4454	3.44587		Clec7a	741.275	1640.34	0.451903
Kctd12	127.66	39.14	3.26162		Cd63	1081.8	2640.04	0.409768
Cd2	45.9541	123.268	0.372798		Rpl38-ps2	109.275	74.5498	1.4658
Spaca6	23.7498	67.5688	0.351491		Snw1	239.923	162.819	1.47356
Hsph1	68.2604	20.5047	3.32902		Cluh	128.989	91.8632	1.40414
Ccnd2	2966.55	5781.31	0.513128		Osm	25.161	129.801	0.193842
mt-Nd1	434.368	809.643	0.536493		Yipf1	84.4137	142.338	0.593052
Tes	172.467	67.5247	2.55414		Spryd3	141.352	96.013	1.47221
Hba-a1	1814.53	188.892	9.60617		Cfp	59.7505	112.418	0.531503
RP23-59N15.4	108.13	21.5101	5.02696		Psme3	135.856	93.3298	1.45566
Bcl10	125.533	50.0409	2.50861		Cenpb	259.829	176.813	1.46952
Ube2j2	16.4311	51.9584	0.316236		Ppm1g	189.495	128.445	1.47531
Dazap1	52.4261	116.566	0.449753		Phf1	72.4078	148.935	0.48617
Zeb2	711.895	378.38	1.88143		Rab5c	3147.76	1941.66	1.62117
Bub1b	20.5781	63.3844	0.324656		Eci2	161.331	110.165	1.46445
mt-Ta	325.639	124.638	2.61269		Slc7a11	52.6385	191.387	0.275038
C3	261.232	101.747	2.56746		Mfsd7c	170.133	99.848	1.70392
Samhd1	291.503	112.567	2.58958		Pa2g4	241.184	173.772	1.38793
I830012O16Rik	26.5935	3.19922	8.31247		Rnf10	497.728	312.154	1.59449
mt-Tq	516.472	171.315	3.01475		Tsc22d3	123.26	285.433	0.431833
Snx20	116.855	50.9399	2.29399		Ctsz	1258.12	2241.49	0.561285
Slco2b1	15.6849	54.7129	0.286677		Hist1h1c	83.016	170.605	0.486598
Ddx54	29.4683	80.3252	0.366862		Gal	145.519	82.2825	1.76853
Trib1	541.049	194.407	2.78308		Jund	84.0595	146.586	0.573449
Gmfg	31.9601	6.50102	4.91617		Atp6v0d1	242.153	404.684	0.598375
Smc6	82.2883	172.774	0.476278		Tppp3	227.783	127.219	1.79048
Atp5g3	270.558	619.443	0.436777		Fcgr4	156.761	288.559	0.543255
Psmb8	105.294	46.2513	2.27656		Gga1	87.7083	149.023	0.588553
Cfb	668.691	307.009	2.17809		Rbm47	86.3468	155.959	0.553651
Net1	20.3515	56.7311	0.358737		B2m	1495.16	2789.68	0.53596
Clec4d	129.329	39.1151	3.30637		Dgat1	88.4432	207.087	0.427083
Irg1	650.094	91.4471	7.10897		Lsr	266.458	159.814	1.6673
Ifi204	56.6987	14.8712	3.81266		Sgk1	318.806	591.934	0.538584
Zfp36l1	175.236	58.8353	2.97842		Psma3	103.573	70.3907	1.47141
Ereg	21.0763	3.87204	5.4432		Prpf19	126.2	90.568	1.39343
Mbp	20.0969	58.7881	0.341853		Mgll	379.897	675.395	0.562482
Cmtm7	71.6845	23.4356	3.05879		E2f1	170.005	111.814	1.52043
Pigr	19.0261	97.4125	0.195315		Atic	263.455	158.51	1.66206
Tmem205	15.6767	2.47127	6.34358		Cmip	161.992	260.527	0.621787
Htatip2	3.6611	18.2036	0.201119		Sat1	80.1613	161.7	0.495742
Pilrb2	45.3439	10.1086	4.48568		Dctn3	177.369	129.21	1.37271
Cdh1	89.7833	180.915	0.496273		Spen	110.062	77.7125	1.41627
Ice1	10.7162	34.2764	0.312641		Mpc2	154.08	93.0302	1.65624
Tnfaip2	1878.41	1029.01	1.82546		Il1b	96.2858	518.218	0.185802
Kctd20	47.9502	11.8764	4.03744		Mrpl4	120.099	83.6928	1.435
Ccl3	116.097	31.4767	3.68836		Fam134a	147.842	230.878	0.640345
Myo1e	19.9013	52.3217	0.380365		Lpl	3597.63	2241.7	1.60486
Rest	318.334	158.552	2.00776		Slirp	130.019	95.4675	1.36192
Sart1	21.9142	54.679	0.400778		Alas2	937.718	146.436	6.40363
Man2a2	77.3243	31.2214	2.47664		43531	55.1762	100.597	0.548485
Zdhhc18	47.032	13.6254	3.45179		Acp5	173.86	319.465	0.544222
Gys1	68.4791	25.7107	2.66345		Cd274	77.7313	171.463	0.453341
9330104G04Rik	53.9892	11.8197	4.56772		Unc93b1	157.007	292.18	0.537362
Ccrl2	86.6808	26.6422	3.25352		Pcbp1	222.356	166.229	1.33765
Il1rn	1203.24	578.199	2.08102		Tgfbr1	210.669	149.255	1.41147
Cd33	182.46	84.683	2.15462		Krt79	1429.03	958.604	1.49074
Whsc1l1	185.547	86.5816	2.14303		Cd300lf	758.102	1678.77	0.451582
Zfp84	11.8546	39.9452	0.296771		Ier3	95.0555	440.169	0.215952
Ell2	77.1143	27.3304	2.82155		Ncor2	154.512	101.028	1.5294
Snhg9	27.9125	81.2968	0.343341		Rassf4	330.093	239.705	1.37708
Hp	504.886	76.4209	6.60664		H2-K1	1241.67	2258.03	0.54989
Dgat1	193.256	55.567	3.47789		E430025E21Rik	109.435	76.6797	1.42717
Neurl1b	200.432	400.998	0.499834		Fnta	165.013	123.527	1.33585
Fosl2	284.674	137.896	2.0644		Srsf9	103.716	180.956	0.573156
Mt2	337.038	760.664	0.443084		Nlrx1	185.163	132.192	1.40071
Tacc2	11.2872	40.7693	0.276855		Nap1l4	327.045	240.251	1.36127
Etv1	46.3051	9.07106	5.1047		Mvd	93.2537	163.476	0.570444
F10	267.253	153.492	1.74115		Hnrnpa0	555.914	417.796	1.33059
1200014J11Rik	23.3181	56.2716	0.414386		Slamf9	294.9	212.597	1.38713
Gyg	60.8049	21.1964	2.86865		Chil3	8056.12	19065.2	0.422555
Arfgap1	14.4779	41.4984	0.34888		Bckdk	74.5885	136.607	0.546006
Igsf6	127.823	63.141	2.02441		Serbp1	790.293	559.315	1.41297
Mndal	53.385	14.8901	3.58526		B3gnt7	78.8055	153.551	0.51322
Rsu1	11.575	37.1853	0.311278		Marco	1073.76	2358.97	0.455183
Rreb1	15.7559	49.0559	0.321182		Eef1g	99.6875	161.996	0.61537
Mob3a	99.0931	37.2154	2.66269		Il10rb	109.127	196.14	0.556372
Wfdc21	1142.23	581.033	1.96586		Trim41	62.5533	103.733	0.603023
Gdf15	181.357	95.456	1.8999		Stx16	101.501	74.2858	1.36636
Litaf	118.889	48.0114	2.47627		Dhx9	221.274	146.638	1.50898
Ier5	411.764	204.017	2.01828		Copz1	116.774	188.496	0.619502
Ncor2	66.8229	144.529	0.462348		Smap2	129.944	215.73	0.602348
Tap1	215.976	30.6554	7.0453		Neurl1b	163.512	116.337	1.40551
Arl4c	77.8038	26.4871	2.93743		Nmt1	232.515	170.048	1.36735
Entpd1	82.6821	22.6058	3.65756		Dusp6	91.189	174.057	0.523904
Dusp16	123.749	45.1518	2.74073		Cyp51	123.394	236.346	0.522092
Stk10	21.4019	65.2675	0.327911		Fbxl5	99.2368	170.671	0.581451
RP23-122P5.3	82.4644	27.8598	2.95998		Fabp1	203.511	111.918	1.81839
Kctd11	101.056	42.9075	2.3552		Gp49a	69.7635	141.064	0.494554
Nab1	57.4547	25.125	2.28676		Eif3g	136.402	99.272	1.37402
Nod1	97.5326	42.5109	2.2943		Ube2l6	118.289	51.9997	2.27479
Birc3	56.0019	17.3835	3.22156		Glud1	772.251	564.688	1.36757
Gltscr1l	8.27069	30.0123	0.275577		Rgcc	65.5285	197.391	0.331973
Ngrn	3.26726	17.4688	0.187034		Nr4a1	63.6255	223.499	0.28468
Triobp	59.4664	24.5937	2.41796		Fabp4	270.813	495.63	0.546402
Rpl19	26.2928	6.23008	4.2203		Trappc3	129.724	84.0247	1.54388
Skil	146.147	63.9949	2.28373		Atg101	69.768	115.502	0.604039
Ndufb8	71.0667	138.616	0.512688		Ctsb	506.671	844.495	0.59997
Fcgr3	505.178	247.352	2.04235		Ppp2r1b	103.566	75.2185	1.37686
Cdk14	24.0218	59.1823	0.405895		Ets2	49.3503	136.163	0.362434
Kpna4	145.156	71.3858	2.0334		Irf1	126.637	262.552	0.482333
Isg15	288.696	108.287	2.66603		Ddx24	204.685	139.18	1.47065
Rheb	8.79013	31.9612	0.275025		Aplp2	436.601	326.664	1.33654
Lmo7	39.5656	92.1795	0.429223		Aifm2	62.2743	108.431	0.574319
Brd9	63.1607	123.213	0.512612		H2-DMa	190.007	136.237	1.39468
Angel2	10.6258	36.308	0.292658		Psmd2	166.407	246.484	0.675126
Rab11fip1	120.112	52.6905	2.27958		Rpl9-ps6	98.0235	158.559	0.618214
Trem1	423.031	156.772	2.69838		Fnip1	70.336	120.113	0.585581
Hspd1	124.354	59.8708	2.07704		Brk1	214.485	169.364	1.26641
Dhrs3	16.9266	54.5494	0.310299		Cidec	666.714	409.167	1.62944
Dus1l	4.59772	20.7378	0.221707		Ear1	1725.72	1062.04	1.62491
Csf1r	270.163	139.902	1.93108		Ssbp4	151.918	252.948	0.60059
Tmem183a	60.8151	26.1052	2.32961		Arrdc1	89.189	148.167	0.601949
Lck	43.9584	9.48923	4.63245		Use1	121.75	86.326	1.41036
Krt79	445.729	761.583	0.585266		Chchd10	47.5095	103.874	0.457375
Fgd3	46.7357	12.7184	3.67465		Romo1	166.865	116.574	1.4314
Jak2	116.613	50.6729	2.3013		Tuba4a	544.384	380.84	1.42943
Hivep3	171.179	314.98	0.543459		Eif5b	280.799	219.495	1.2793
Samsn1	212.576	93.6111	2.27085		Lsp1	397.067	277.441	1.43117
Ndufv1	34.8886	100.733	0.346347		Unc119	343.548	260.511	1.31874
Gpbp1	88.5984	42.714	2.07422		Tap2	224.452	450.173	0.498589
Tax1bp1	295.826	154.962	1.90903		Acsl5	193.418	138.983	1.39166
2410002F23Rik	29.6605	75.0457	0.395232		Rpl35	327.577	229.514	1.42726
S100a8	7336.92	835.232	8.78429		Tsn	212.523	159.264	1.3344
Klf3	167.439	85.7456	1.95274		Rpl14	402.966	643.249	0.626455
Midn	94.5058	47.0665	2.00792		Psma2	348.264	268.109	1.29896
Clec4e	211.382	100.114	2.11141		Soat1	86.9657	137.353	0.633153
Tbce	7.39852	27.6121	0.267945		Sepp1	363.066	256.155	1.41737
Atp1a1	192.768	334.918	0.575567		Cybb	1461.1	2414.01	0.605258
Ncf4	38.2785	13.8549	2.76281		Cyba	874.114	1366.65	0.639602
Dnajb1	56.315	20.487	2.74881		Rnf6	110.626	74.515	1.48461
Scamp1	19.4553	48.1239	0.404275		Atf4	224.644	377.082	0.595743
Rnf25	5.90913	23.0373	0.256503		Pgls	250.759	416.64	0.60186
Gga1	90.5625	45.8936	1.97331		Plin3	82.3063	136.589	0.602584
Etnk2	22.0889	6.17378	3.57786		Tceb2	224.101	175.674	1.27566
Bhlhe41	60.7454	115.277	0.526951		Lrrc59	150.655	115.625	1.30296
Vav2	20.1978	55.7913	0.362024		Atxn10	275.967	210.31	1.31219
Mxd1	640.257	121.881	5.25315		Junb	132.399	286.716	0.461778
Tmed9	204.911	427.626	0.479183		Csnk1d	201.969	156.975	1.28662
Txnl1	17.4416	45.8797	0.38016		Znhit1	80.217	143.812	0.557792
Pygo2	83.8071	149.494	0.560606		Lage3	71.9257	115.436	0.62308
Hba-a2	649.794	85.7135	7.581		Ubash3b	195.97	143.88	1.36203
Cpne2	60.3438	13.8413	4.35969		Pfkfb4	184.394	144.34	1.2775
Mtmr2	20.4396	4.85376	4.21107		S100a8	128.647	914.904	0.140613
Prdx5	252.17	137.683	1.83153		Gars	225.651	175.499	1.28576
Dip2a	20.6924	5.43928	3.80425		Psmd3	265.58	210.408	1.26221
Cdc42bpb	36.6343	89.6346	0.408707		Rpl28	432.112	315.26	1.37065
Chd7	279.712	115.41	2.42362		Coro1c	703.977	517.384	1.36065
Clec5a	125.595	54.521	2.30361		Hbb-bt	7363.8	1565.93	4.70252
S100a9	4684.37	471.43	9.93651		Nedd9	190.093	139.339	1.36425
Pacs2	17.284	43.1068	0.400958		Tmem259	109.229	164.188	0.66527
Hexim1	43.9494	14.3819	3.05588		R3hdm4	125.25	216.394	0.578802
2210013O21Rik	3.66773	16.0315	0.228783		Cebpb	310.25	617.323	0.502574
Mecom	76.5382	225.609	0.339251		Mtdh	285.483	203.667	1.40171
Slc7a11	348.761	149.716	2.32948		Atp6v1e1	348.576	530.703	0.656819
Casp4	105.679	45.5949	2.31777		Dhrs1	131.398	97.328	1.35006
Ccr1	88.961	38.6205	2.30347		Myo1f	194.121	135.593	1.43165
Socs2	54.3515	101.491	0.535528		Luzp1	111.675	80.8843	1.38068
Hcls1	211.545	123.537	1.7124		Amz1	527.108	356.836	1.47717
Pogz	5.53508	19.4597	0.284438		Cttnbp2nl	217.584	144.867	1.50196
mt-Tm	203.702	103.242	1.97306		Rpl36al	208.488	149.541	1.39419
Wdr45b	29.2968	65.9009	0.444558		Arpc5l	123.073	96.6538	1.27334
Vimp	57.4948	121.673	0.472536		Eif4g1	200.776	158.965	1.26301
1110008F13Rik	87.6717	38.7656	2.26159		Cyb5a	158.193	120.386	1.31404
Tnfaip8	152.367	76.5127	1.9914		Bzw2	184.755	138.426	1.33468
Dopey2	31.5075	10.6776	2.9508		Grina	325.745	542.865	0.600048
Sh3bp2	60.7658	127.904	0.475089		Arl8b	111.383	173.287	0.642764
Slc9a3r1	42.2711	15.5192	2.72378		Tor1aip2	175.724	139.083	1.26344
Zfp687	9.70334	30.6569	0.316514		Cd84	190.622	287.77	0.662413
Gtpbp8	27.8761	6.90025	4.03987		Hsp90aa1	107.435	73.259	1.46651
Nip7	5.23788	19.148	0.273547		Uhmk1	107.406	168.471	0.637534
Ube2h	58.1713	24.8849	2.33762		Commd7	188.108	151.9	1.23837
Adora2a	81.7444	29.7312	2.74944		Clec4n	1133.87	801.528	1.41463
Sec31a	23.6053	55.6106	0.424475		Ccl4	21.4545	177.005	0.121208
Klf9	39.3482	88.6141	0.444039		Gpd2	119.471	93.7335	1.27458
Nvl	4.35908	15.2676	0.285512		Lsm6	127.287	91.3483	1.39342
Vps8	18.5798	4.20594	4.4175		Rps16	453.844	348.418	1.30259
Ago3	14.0993	36.6069	0.385156		Tuba1b	380.802	263.08	1.44748
Zfp710	58.2004	28.9667	2.00922		Slco2b1	103.369	67.4043	1.53357
Tle3	114.812	62.0074	1.85159		Rps23	201.248	152.639	1.31845
Fpr1	252.937	135.606	1.86523		Cers2	195.286	293.968	0.664312
Ier3	1641.09	348.88	4.70389		P2ry13	474.626	319.513	1.48547
Dirc2	32.4142	11.8808	2.72829		Abhd17c	127.31	191.919	0.663353
mt-Nd2	3277.18	5577.55	0.587567		Tmsb10	64.8302	106.535	0.608535
Ogt	20.5096	61.1382	0.335463		Ear2	559.333	380.727	1.46912
Adprh	73.0595	32.8333	2.22516		Lmna	654.139	475.21	1.37652
Arid3a	60.6063	26.8395	2.2581		Klf13	400.89	314.488	1.27474
Plet1	430.092	794.126	0.541591		Alox5	232.07	156.886	1.47923
Rel	136.674	59.3532	2.30272		Rtfdc1	124.785	191.275	0.652387
Rnf213	56.6533	19.6182	2.88779		Fam96a	107.363	81.3372	1.31998
Cflar	463.397	271.435	1.70721		Dpm3	127.175	91.0067	1.39743
N4bp1	246.829	144.427	1.70902		Irg1	19.6625	142.014	0.138454
Rbpj	111.039	60.21	1.84419		H2afy	85.422	130.067	0.656755
Mroh2a	190.49	64.6535	2.94632		Ctsl	233.036	390.032	0.59748
Ppp3ca	130.113	75.5647	1.72187		Fam168b	129.664	102.497	1.26505
Hif1a	149.56	58.2097	2.56934		Rpl11	839.856	663.322	1.26614
Lilrb4	227.648	137.688	1.65336		Tyrobp	1593.86	1172.69	1.35915
Nol11	14.4062	38.6444	0.37279		Prkcd	103.106	160.865	0.640945
Wdr77	5.4644	20.4089	0.267746		Ddx5	256.629	390.027	0.657977
B230354K17Rik	31.0573	11.3958	2.72532		Anxa5	509.08	410.244	1.24092
Tef	33.2049	74.496	0.445727		Rac1	640.384	498.056	1.28577
Dctn5	37.8585	12.1703	3.11073		Plaur	75.297	137.309	0.548378
Mocs2	12.7235	36.2833	0.350671		Tpra1	61.2212	106.323	0.575804
Phf12	12.9164	37.5729	0.34377		Tcirg1	106.478	165.463	0.643519
G0s2	42.8143	12.7902	3.34744		Kazald1	108.686	62.7383	1.73237
Gng12	37.466	9.23705	4.05605		Fcgr3	372.83	591.772	0.630023
Actr3	119.491	61.5697	1.94075		Ccnl1	73.3773	121.082	0.606015
Fyn	10.5513	31.3964	0.336068		Cdh1	288.07	573.565	0.502244
Dhx38	110.68	45.4899	2.43306		Cpsf1	109.504	87.4522	1.25216
Nhlrc3	9.8097	26.9042	0.364616		Elavl1	80.3955	127.478	0.630661
Gm26740	32.4093	11.0125	2.94297		Sdhc	164.832	126.625	1.30173
Smim13	25.5044	8.99481	2.83546		Bst2	67.1713	124.265	0.540547
Slc6a6	197.119	304.295	0.647788		Stom	118.013	176.981	0.666814
G6pdx	38.3209	14.7514	2.59777		Gla	98.3438	151.257	0.650175
Fbxo33	17.3235	3.50408	4.94382		Spint1	111.822	79.215	1.41163
Tbkbp1	53.7967	24.2688	2.2167		S100a9	100.38	885.588	0.113348
Pnrc1	36.4168	14.7842	2.46322		Card11	165.977	127.448	1.30231
RP24-188H2.3	33.5444	9.01822	3.71962		Pip5k1a	106.017	76.7678	1.38101
Gabarap	958.282	649.039	1.47646		Chmp3	241.459	196.929	1.22612
					Fus	1560.6	1088.61	1.43357
					Vapb	385.75	299.845	1.2865
					Cd36	242.973	397.82	0.61076
					P2rx4	120.095	183.69	0.653796
					Vimp	123.428	186.321	0.662449
					6330416G13Rik	114.919	92.2555	1.24567
					Tuba1c	429.511	322.931	1.33004
					Pitpna	468.129	369.652	1.26641
					Sec63	126.159	183.995	0.685662
					Perp	115.482	81.7905	1.41192
					Gde1	87.7772	130.592	0.67215
					Scarb1	177.489	130.344	1.36169
					Spns1	140.847	215.741	0.652851
					Mapk3	787.683	1217.42	0.647008
					Nagpa	260.472	211.065	1.23409
					Ncl	658.076	514.28	1.27961
					Hcar2	189.137	370.668	0.51026
					Lasp1	169.807	268.799	0.631724
					Plcg2	108.259	82.0895	1.31879
					Mtmr6	159.968	124.182	1.28817
					Hmox1	160.218	255.739	0.626491
					Mtch1	113.8	171.403	0.663935
					Map2k2	413.39	300.046	1.37775
					Ddx21	189.624	139.531	1.359
					Clptm1	164.038	131.06	1.25163
					Sod1	313.466	251.267	1.24754
					Nampt	194.489	318.564	0.610518
					Ahnak	847.04	648.87	1.30541
					Ch25h	98.8675	246.732	0.400708
					Pim1	106.148	200.588	0.529183
					Hsd17b11	264.792	200.923	1.31788
					Dlst	198.404	164.638	1.20509
					Ctsk	770.47	1373.86	0.560808
					Msmo1	99.813	158.7	0.628942
					Cbfb	137.765	109.034	1.2635
					Pfn1	225.532	383.04	0.588796
					Axl	816.289	643.693	1.26813
					Cd52	530.42	783.841	0.676694
					Mmp19	352.078	580.8	0.606195
					Srsf11	162.064	134.016	1.20929
					Pdia6	254.591	361.933	0.703419
					Atg2a	72.0465	112.704	0.639253
					Myl12a	393.193	315.75	1.24527
					Srebf2	164.369	246.589	0.666569
					Lhfpl2	96.2575	148.998	0.646032
					Camkk2	222.279	174.5	1.27381
					Map1lc3a	266.796	199.754	1.33562
					Mgat4b	286.105	231.938	1.23354
					Btg1	93.855	150.157	0.625046
					Slc9a4	171.064	132.418	1.29185
					Pltp	145.305	96.1755	1.51083
					Rps4x	126.952	97.655	1.30001
					Lfng	87.2175	126.728	0.688226
					Stk24	269.876	214.479	1.25829
					Fcgrt	237.428	172.474	1.37661
					Rpl31	820.711	621.664	1.32018
					Myh9	543.74	432.152	1.25821
					Arglu1	131.128	107.557	1.21915
					Bub1b	114.471	83.8202	1.36567
					Pafah1b1	212.989	175.574	1.2131
					Aldoa	602.476	896.739	0.671852
					Chic2	137.26	103.355	1.32804
					Ndufb11	108.493	85.9718	1.26196
					4933426M11Rik	82.4688	137.258	0.600831
					Emd	171.54	135.905	1.26221
					Hspa5	1307.23	2121.62	0.616147
					Gpx1	1996.74	1497.07	1.33377
					Pik3cd	147.867	234.529	0.630483
					Phlpp1	7.25775	3.88425	1.86851
					Toporsos	26.8153	17.8505	1.50221
					Plekhm2	155.121	229.873	0.67481
					Srgn	156.227	409.286	0.381705
					Rpl5	145.611	109.461	1.33026
					Parvg	158.326	121.737	1.30056
					Atp5h	167.935	131.277	1.27924
					Rps17	241.215	192.178	1.25516
					Pmepa1	105.06	77.9257	1.3482
					Cyb5r3	658.675	513.937	1.28163
					Basp1	95.8017	238.742	0.401278
					Phlda1	168.112	109.358	1.53726
					Tonsl	424.659	347.084	1.22351
					Sun2	221.057	179.965	1.22834
					Npepps	106.557	153.302	0.695081
					Fkbp1a	322.37	257.255	1.25311
					Ube2j1	225.484	183.915	1.22602
					Rpsa-ps10	12.122	6.755	1.79452
					Dgkz	246.135	380.238	0.647319
					Ralgds	370.533	573.03	0.64662
					Cnot1	166.704	262.829	0.63427
					Slc25a39	144.783	118.918	1.2175
					Tapbp	391.391	578.854	0.676147
					Rpl35a	204.141	154.827	1.31851
					Gnai3	86.4738	133.964	0.6455
					Ptafr	38.2692	100.177	0.382017
					Rps28	1226.97	977.796	1.25483
					Alox5ap	754.611	590.183	1.27861
					Nucb1	77.6138	114.093	0.680267
					Actr10	118.776	99.7818	1.19036
					Tacc1	159.931	128.286	1.24667
					Ndufb9	156.426	125.703	1.24441
					Actl6a	158.343	132.471	1.1953
					Ppp6r3	166.873	137.661	1.2122
					Rps29	1567.81	1208.59	1.29722
					Deptor	101.948	79.8762	1.27632
					Saraf	339.643	280.755	1.20975
					Anapc11	231.137	195.303	1.18348
					Atp5j	294.591	216.197	1.36261
					Capn2	247.263	203.016	1.21795
					Zswim8	147.844	214.272	0.689983
					Slc16a3	69.405	132.426	0.524105
					Marveld1	206.355	167.917	1.22891
					Kdm4a	129.787	104.163	1.24601
					Atp5e	619.394	886.84	0.698428
					Csnk2b	158.214	230.129	0.687504
					Hdc	57.7307	305.207	0.189153
					Klf10	109.179	89.6568	1.21774
					Atpif1	321.182	261.319	1.22908
					Jagn1	135.795	104.457	1.30001
					Arf1	301.238	246.762	1.22076
					Nasp	130.782	103.483	1.26381
					Wdfy3	121.289	96.5462	1.25628

## Sheet: 1A0 F vs 1A3 F
1A0-Females					1A3-Females						common genes between 1A0 vs 1A3
	average	average	fold			average	average	fold			1A0 Female					1A3 Female							1A0 Male	1A0 Female	1A3 male	1A3 Female
Associated.Gene.Name	male	Female	f/m		Associated_Gene_Name	male	Female	f/m			Associated_Gene_Name	male	Female	f/m		Associated_Gene_Name	male	Female	f/m			Marcks	5.746	0.174034	0.140937	7.09534
Itgam	258.132	25.8395	0.100102		Xist	788.545	1075.06	1.36335			Marcks	260.291	45.2995	0.174034		Marcks	25.1013	178.102	7.09534			Hcar2	3.92563	0.254736	0.51026	1.95978
Lcn2	302.531	62.8187	0.207644		Mfge8	29.7752	627.277	21.0671			Hcar2	1364.44	347.572	0.254736		Hcar2	189.137	370.668	1.95978			Mmp8	5.84192	0.171177	0.339018	2.9497
Rsad2	204.589	36.9308	0.180512		Agpat1	42.2325	116.626	2.76151			Mmp8	370.583	63.4351	0.171177		Mmp8	42.9562	126.708	2.9497			Cd52	2.40223	0.41628	0.676694	1.47777
Inhba	111.759	11.7597	0.105224		Zfp36	89.9068	447.543	4.97786			Cd52	560.831	233.463	0.41628		Cd52	530.42	783.841	1.47777			Ets2	4.12985	0.242139	0.362434	2.75912
Marcks	260.291	45.2995	0.174034		Trem2	30.6412	100.475	3.27906			Ets2	484.62	117.346	0.242139		Ets2	49.3503	136.163	2.75912			Zfp36	5.04433	0.198242	0.20089	4.97786
Kdm7a	169.83	46.7496	0.275273		Mmp12	6.08475	328.624	54.0078			Zfp36	309.084	61.2735	0.198242		Zfp36	89.9068	447.543	4.97786			Il1b	7.09918	0.140861	0.185802	5.38209
Nfkbiz	164.888	22.3972	0.135833		Tap1	37.4625	113.152	3.0204			Il1b	2913.01	410.33	0.140861		Il1b	96.2858	518.218	5.38209			Ptafr	3.8673	0.258578	0.382017	2.61768
Tnip1	302.668	113.968	0.376544		Bpgm	170.264	28.9962	0.170302			Ptafr	237.274	61.354	0.258578		Ptafr	38.2692	100.177	2.61768			Grina	2.97069	0.336622	0.600048	1.66653
Btg2	107.575	26.8232	0.249346		Plxnd1	61.521	157.115	2.55385			Grina	825.792	277.98	0.336622		Grina	325.745	542.865	1.66653			Btg1	2.73333	0.365854	0.625046	1.59988
Hcar2	1364.44	347.572	0.254736		Manf	150.504	378.147	2.51253			Btg1	773.377	282.943	0.365854		Btg1	93.855	150.157	1.59988			Junb	2.89876	0.344975	0.461778	2.16554
Mmp8	370.583	63.4351	0.171177		AA467197	66.971	523.491	7.81668			Junb	1261.14	435.06	0.344975		Junb	132.399	286.716	2.16554			Hba-a1	9.60617	0.1041	13.9534	0.0716671
Ptger4	10.4855	50.068	4.77499		Kdm5c	52.9733	106.303	2.00673			Hba-a1	1814.53	188.892	0.1041		Hba-a1	13144.8	942.052	0.0716671			Bub1b	0.324656	3.08019	1.36567	0.73224
Cd52	560.831	233.463	0.41628		Tmx1	192.19	127.505	0.663432			Bub1b	20.5781	63.3844	3.08019		Bub1b	114.471	83.8202	0.73224			C3	2.56746	0.38949	0.419607	2.38319
S100a6	1071.06	246.121	0.229792		Lgmn	39.3695	108.172	2.74762			C3	261.232	101.747	0.38949		C3	110.783	264.017	2.38319			Slco2b1	0.286677	3.48824	1.53357	0.652074
Mir142hg	182.74	52.1853	0.285572		Angptl4	204.242	96.839	0.47414			Slco2b1	15.6849	54.7129	3.48824		Slco2b1	103.369	67.4043	0.652074			Irg1	7.10897	0.140667	0.138454	7.22259
Gadd45b	135.944	24.0876	0.177188		Spp1	53.2658	160.678	3.01653			Irg1	650.094	91.4471	0.140667		Irg1	19.6625	142.014	7.22259			Cdh1	0.496273	2.01502	0.502244	1.99106
Ets2	484.62	117.346	0.242139		Ldlr	126.979	270.607	2.13112			Cdh1	89.7833	180.915	2.01502		Cdh1	288.07	573.565	1.99106			Dgat1	3.47789	0.287531	0.427083	2.34146
Zfp36	309.084	61.2735	0.198242		S100a1	319.43	656.503	2.05523			Dgat1	193.256	55.567	0.287531		Dgat1	88.4432	207.087	2.34146			Neurl1b	0.499834	2.00067	1.40551	0.711486
Bcl2l11	352.694	110.59	0.313557		Cox7a2l	77.3483	164.557	2.12748			Neurl1b	200.432	400.998	2.00067		Neurl1b	163.512	116.337	0.711486			Gdf15	1.8999	0.526342	0.366431	2.72902
Ppp1r3b	151.962	32.3798	0.213078		Gpnmb	854.082	1650.35	1.93231			Gdf15	181.357	95.456	0.526342		Gdf15	78.4617	214.124	2.72902			Ncor2	0.462348	2.16287	1.5294	0.653851
Acp2	212.692	88.8966	0.41796		Nars	170.495	110.434	0.647722			Ncor2	66.8229	144.529	2.16287		Ncor2	154.512	101.028	0.653851			Tap1	7.0453	0.141939	0.331082	3.0204
Ifitm2	105.393	18.4067	0.174648		Bhlhe40	82.9235	187.947	2.2665			Tap1	215.976	30.6554	0.141939		Tap1	37.4625	113.152	3.0204			Fcgr3	2.04235	0.489632	0.630023	1.58724
Ccdc88b	54.175	13.9439	0.257386		Fam220a	132.891	39.1833	0.294852			Fcgr3	505.178	247.352	0.489632		Fcgr3	372.83	591.772	1.58724			Krt79	0.585266	1.70862	1.49074	0.670807
Snx18	118.163	33.8883	0.286792		Lipf	138.55	25.7115	0.185576			Krt79	445.729	761.583	1.70862		Krt79	1429.03	958.604	0.670807			S100a8	8.78429	0.11384	0.140613	7.11171
Lst1	61.7061	8.06127	0.13064		Hba-a1	13144.8	942.052	0.0716671			S100a8	7336.92	835.232	0.11384		S100a8	128.647	914.904	7.11171			Gga1	1.97331	0.506762	0.588553	1.69908
Nfe2l2	367.539	137.892	0.375176		Foxk1	69.759	144.019	2.06452			Gga1	90.5625	45.8936	0.506762		Gga1	87.7083	149.023	1.69908			Hba-a2	7.581	0.131909	12.9415	0.0772708
Cd97	123.603	24.8568	0.201102		Herpud1	151.73	288.232	1.89964			Hba-a2	649.794	85.7135	0.131909		Hba-a2	9315.65	719.827	0.0772708			S100a9	9.93651	0.100639	0.113348	8.82236
Dnah12	14.4693	111.858	7.73068		C3	110.783	264.017	2.38319			S100a9	4684.37	471.43	0.100639		S100a9	100.38	885.588	8.82236			Slc7a11	2.32948	0.42928	0.275038	3.63587
Cxcr4	96.0983	20.981	0.218329		Il11ra1	74.958	165.258	2.20467			Slc7a11	348.761	149.716	0.42928		Slc7a11	52.6385	191.387	3.63587			Vimp	0.472536	2.11624	0.662449	1.50955
Cd14	207.586	45.3932	0.218672		Lrg1	30.5647	211.008	6.90365			Vimp	57.4948	121.673	2.11624		Vimp	123.428	186.321	1.50955			Ier3	4.70389	0.21259	0.215952	4.63066
Sh2b2	358.093	134.259	0.374927		Rnase2a	1.4085	152.51	108.278			Ier3	1641.09	348.88	0.21259		Ier3	95.0555	440.169	4.63066
Rif1	30.8011	92.2838	2.99612		Hba-a2	9315.65	719.827	0.0772708			common	31
Il1b	2913.01	410.33	0.140861		Dpp3	135.225	90.9273	0.672416			up regulated in both	0
Tnf	107.443	29.937	0.278632		Mmp8	42.9562	126.708	2.9497			1A0 up-1A3 down	5	red
Ptafr	237.274	61.354	0.258578		Rpl36	185.954	108.534	0.58366			1A0 down-1A3 up	16	black
Rab44	135.693	41.7891	0.307969		Ccl17	44.0175	220.125	5.00085			1A0=1A3	10	green
Snap23	160.145	56.532	0.353006		Marcks	25.1013	178.102	7.09534
Mcfd2	2.09125	21.2625	10.1673		Gins2	104.465	61.6665	0.590311
Usp46	2.81483	23.5415	8.36339		Hbb-bs	46650.7	3655.26	0.0783538
Rtp4	56.1175	9.00441	0.160456		Aprt	330.608	231.024	0.698785
Samd9l	53.6605	10.7133	0.19965		2310036O22Rik	178.597	321.485	1.80006
H2-Ab1	407.535	102.574	0.251693		Glg1	243.889	157.425	0.645477
Dgat2	104.418	26.7162	0.255858		Gdf15	78.4617	214.124	2.72902
Ifi203	75.2555	21.1673	0.281273		Mcm3	125.595	72.0913	0.573997
Nlrp3	188.882	41.1966	0.218107		Mkrn1	255.694	137.155	0.536402
Ccl5	101.664	16.858	0.165822		Myl6	498.7	321.693	0.645064
Grina	825.792	277.98	0.336622		Ybx1	186.633	396.106	2.12238
Gbp2	99.6875	16.0439	0.160942		Tmem216	155.115	95.5675	0.616107
Btg1	773.377	282.943	0.365854		Cd93	38.278	121.77	3.18121
Fkbp15	78.3216	29.6039	0.377979		Serp1	241.579	415.224	1.71879
Glul	262.438	596.79	2.27402		Cdk11b	63.758	117.765	1.84706
Smox	171.405	31.926	0.186261		Fam46c	116.129	21.2907	0.183336
Nudt4	93.3096	27.2534	0.292075		Rilpl2	52	117.771	2.26482
Rasgrp2	61.6833	10.3172	0.167261		Xdh	52.908	111.557	2.10851
Cxcl1	45.6576	10.9001	0.238736		Clec4b1	123.127	70.6895	0.574117
Igf1r	65.693	16.1407	0.245699		Wfdc17	52.2218	192.075	3.67807
Ggct	71.497	19.3018	0.269967		Fam89a	187.211	105.703	0.564619
Junb	1261.14	435.06	0.344975		Igf1	37.096	108.822	2.93351
Slc25a37	101.465	29.4454	0.290202		Clec7a	741.275	1640.34	2.21286
Kctd12	127.66	39.14	0.306596		Cd63	1081.8	2640.04	2.44041
Cd2	45.9541	123.268	2.68242		Rpl38-ps2	109.275	74.5498	0.682223
Spaca6	23.7498	67.5688	2.84503		Snw1	239.923	162.819	0.67863
Hsph1	68.2604	20.5047	0.300389		Cluh	128.989	91.8632	0.712179
Ccnd2	2966.55	5781.31	1.94883		Osm	25.161	129.801	5.15884
mt-Nd1	434.368	809.643	1.86396		Yipf1	84.4137	142.338	1.68619
Tes	172.467	67.5247	0.391521		Spryd3	141.352	96.013	0.679249
Hba-a1	1814.53	188.892	0.1041		Cfp	59.7505	112.418	1.88146
RP23-59N15.4	108.13	21.5101	0.198928		Psme3	135.856	93.3298	0.686976
Bcl10	125.533	50.0409	0.398627		Cenpb	259.829	176.813	0.680495
Ube2j2	16.4311	51.9584	3.1622		Ppm1g	189.495	128.445	0.677824
Dazap1	52.4261	116.566	2.22344		Phf1	72.4078	148.935	2.05689
Zeb2	711.895	378.38	0.531512		Rab5c	3147.76	1941.66	0.616838
Bub1b	20.5781	63.3844	3.08019		Eci2	161.331	110.165	0.682852
mt-Ta	325.639	124.638	0.382748		Slc7a11	52.6385	191.387	3.63587
C3	261.232	101.747	0.38949		Mfsd7c	170.133	99.848	0.586882
Samhd1	291.503	112.567	0.386162		Pa2g4	241.184	173.772	0.720496
I830012O16Rik	26.5935	3.19922	0.120301		Rnf10	497.728	312.154	0.627158
mt-Tq	516.472	171.315	0.331702		Tsc22d3	123.26	285.433	2.31571
Snx20	116.855	50.9399	0.435923		Ctsz	1258.12	2241.49	1.78162
Slco2b1	15.6849	54.7129	3.48824		Hist1h1c	83.016	170.605	2.05508
Ddx54	29.4683	80.3252	2.72582		Gal	145.519	82.2825	0.565441
Trib1	541.049	194.407	0.359315		Jund	84.0595	146.586	1.74383
Gmfg	31.9601	6.50102	0.20341		Atp6v0d1	242.153	404.684	1.67119
Smc6	82.2883	172.774	2.09961		Tppp3	227.783	127.219	0.558509
Atp5g3	270.558	619.443	2.2895		Fcgr4	156.761	288.559	1.84076
Psmb8	105.294	46.2513	0.439258		Gga1	87.7083	149.023	1.69908
Cfb	668.691	307.009	0.459118		Rbm47	86.3468	155.959	1.80619
Net1	20.3515	56.7311	2.78756		B2m	1495.16	2789.68	1.86581
Clec4d	129.329	39.1151	0.302447		Dgat1	88.4432	207.087	2.34146
Irg1	650.094	91.4471	0.140667		Lsr	266.458	159.814	0.599771
Ifi204	56.6987	14.8712	0.262284		Sgk1	318.806	591.934	1.85672
Zfp36l1	175.236	58.8353	0.335749		Psma3	103.573	70.3907	0.679621
Ereg	21.0763	3.87204	0.183715		Prpf19	126.2	90.568	0.717653
Mbp	20.0969	58.7881	2.92524		Mgll	379.897	675.395	1.77784
Cmtm7	71.6845	23.4356	0.326927		E2f1	170.005	111.814	0.65771
Pigr	19.0261	97.4125	5.11994		Atic	263.455	158.51	0.601661
Tmem205	15.6767	2.47127	0.15764		Cmip	161.992	260.527	1.60827
Htatip2	3.6611	18.2036	4.97218		Sat1	80.1613	161.7	2.01718
Pilrb2	45.3439	10.1086	0.222932		Dctn3	177.369	129.21	0.728484
Cdh1	89.7833	180.915	2.01502		Spen	110.062	77.7125	0.706081
Ice1	10.7162	34.2764	3.19856		Mpc2	154.08	93.0302	0.603779
Tnfaip2	1878.41	1029.01	0.547807		Il1b	96.2858	518.218	5.38209
Kctd20	47.9502	11.8764	0.247682		Mrpl4	120.099	83.6928	0.696866
Ccl3	116.097	31.4767	0.271123		Fam134a	147.842	230.878	1.56166
Myo1e	19.9013	52.3217	2.62906		Lpl	3597.63	2241.7	0.623106
Rest	318.334	158.552	0.498067		Slirp	130.019	95.4675	0.734255
Sart1	21.9142	54.679	2.49514		Alas2	937.718	146.436	0.156162
Man2a2	77.3243	31.2214	0.403772		43531	55.1762	100.597	1.8232
Zdhhc18	47.032	13.6254	0.289705		Acp5	173.86	319.465	1.83749
Gys1	68.4791	25.7107	0.375453		Cd274	77.7313	171.463	2.20585
9330104G04Rik	53.9892	11.8197	0.218928		Unc93b1	157.007	292.18	1.86094
Ccrl2	86.6808	26.6422	0.30736		Pcbp1	222.356	166.229	0.747582
Il1rn	1203.24	578.199	0.480534		Tgfbr1	210.669	149.255	0.708481
Cd33	182.46	84.683	0.464118		Krt79	1429.03	958.604	0.670807
Whsc1l1	185.547	86.5816	0.466629		Cd300lf	758.102	1678.77	2.21444
Zfp84	11.8546	39.9452	3.3696		Ier3	95.0555	440.169	4.63066
Ell2	77.1143	27.3304	0.354415		Ncor2	154.512	101.028	0.653851
Snhg9	27.9125	81.2968	2.91256		Rassf4	330.093	239.705	0.726176
Hp	504.886	76.4209	0.151363		H2-K1	1241.67	2258.03	1.81855
Dgat1	193.256	55.567	0.287531		E430025E21Rik	109.435	76.6797	0.700689
Neurl1b	200.432	400.998	2.00067		Fnta	165.013	123.527	0.748587
Fosl2	284.674	137.896	0.484401		Srsf9	103.716	180.956	1.74473
Mt2	337.038	760.664	2.25691		Nlrx1	185.163	132.192	0.713922
Tacc2	11.2872	40.7693	3.612		Nap1l4	327.045	240.251	0.73461
Etv1	46.3051	9.07106	0.195898		Mvd	93.2537	163.476	1.75302
F10	267.253	153.492	0.574332		Hnrnpa0	555.914	417.796	0.751547
1200014J11Rik	23.3181	56.2716	2.41321		Slamf9	294.9	212.597	0.720912
Gyg	60.8049	21.1964	0.348597		Chil3	8056.12	19065.2	2.36655
Arfgap1	14.4779	41.4984	2.86632		Bckdk	74.5885	136.607	1.83148
Igsf6	127.823	63.141	0.493972		Serbp1	790.293	559.315	0.707731
Mndal	53.385	14.8901	0.27892		B3gnt7	78.8055	153.551	1.94848
Rsu1	11.575	37.1853	3.21256		Marco	1073.76	2358.97	2.19692
Rreb1	15.7559	49.0559	3.1135		Eef1g	99.6875	161.996	1.62504
Mob3a	99.0931	37.2154	0.37556		Il10rb	109.127	196.14	1.79736
Wfdc21	1142.23	581.033	0.508683		Trim41	62.5533	103.733	1.65831
Gdf15	181.357	95.456	0.526342		Stx16	101.501	74.2858	0.731872
Litaf	118.889	48.0114	0.403833		Dhx9	221.274	146.638	0.6627
Ier5	411.764	204.017	0.49547		Copz1	116.774	188.496	1.6142
Ncor2	66.8229	144.529	2.16287		Smap2	129.944	215.73	1.66017
Tap1	215.976	30.6554	0.141939		Neurl1b	163.512	116.337	0.711486
Arl4c	77.8038	26.4871	0.340434		Nmt1	232.515	170.048	0.731339
Entpd1	82.6821	22.6058	0.273406		Dusp6	91.189	174.057	1.90875
Dusp16	123.749	45.1518	0.364867		Cyp51	123.394	236.346	1.91537
Stk10	21.4019	65.2675	3.04961		Fbxl5	99.2368	170.671	1.71984
RP23-122P5.3	82.4644	27.8598	0.337841		Fabp1	203.511	111.918	0.549937
Kctd11	101.056	42.9075	0.424592		Gp49a	69.7635	141.064	2.02202
Nab1	57.4547	25.125	0.437301		Eif3g	136.402	99.272	0.72779
Nod1	97.5326	42.5109	0.435864		Ube2l6	118.289	51.9997	0.4396
Birc3	56.0019	17.3835	0.310409		Glud1	772.251	564.688	0.731224
Gltscr1l	8.27069	30.0123	3.62875		Rgcc	65.5285	197.391	3.0123
Ngrn	3.26726	17.4688	5.34662		Nr4a1	63.6255	223.499	3.51272
Triobp	59.4664	24.5937	0.413572		Fabp4	270.813	495.63	1.83016
Rpl19	26.2928	6.23008	0.23695		Trappc3	129.724	84.0247	0.647719
Skil	146.147	63.9949	0.43788		Atg101	69.768	115.502	1.65552
Ndufb8	71.0667	138.616	1.95051		Ctsb	506.671	844.495	1.66675
Fcgr3	505.178	247.352	0.489632		Ppp2r1b	103.566	75.2185	0.726289
Cdk14	24.0218	59.1823	2.46369		Ets2	49.3503	136.163	2.75912
Kpna4	145.156	71.3858	0.491786		Irf1	126.637	262.552	2.07325
Isg15	288.696	108.287	0.375089		Ddx24	204.685	139.18	0.67997
Rheb	8.79013	31.9612	3.63603		Aplp2	436.601	326.664	0.748199
Lmo7	39.5656	92.1795	2.32979		Aifm2	62.2743	108.431	1.74119
Brd9	63.1607	123.213	1.95079		H2-DMa	190.007	136.237	0.717009
Angel2	10.6258	36.308	3.41695		Psmd2	166.407	246.484	1.48121
Rab11fip1	120.112	52.6905	0.438677		Rpl9-ps6	98.0235	158.559	1.61756
Trem1	423.031	156.772	0.370592		Fnip1	70.336	120.113	1.70771
Hspd1	124.354	59.8708	0.481455		Brk1	214.485	169.364	0.789633
Dhrs3	16.9266	54.5494	3.2227		Cidec	666.714	409.167	0.613708
Dus1l	4.59772	20.7378	4.51046		Ear1	1725.72	1062.04	0.61542
Csf1r	270.163	139.902	0.517844		Ssbp4	151.918	252.948	1.66503
Tmem183a	60.8151	26.1052	0.429256		Arrdc1	89.189	148.167	1.66127
Lck	43.9584	9.48923	0.215869		Use1	121.75	86.326	0.70904
Krt79	445.729	761.583	1.70862		Chchd10	47.5095	103.874	2.18639
Fgd3	46.7357	12.7184	0.272135		Romo1	166.865	116.574	0.698615
Jak2	116.613	50.6729	0.434538		Tuba4a	544.384	380.84	0.69958
Hivep3	171.179	314.98	1.84007		Eif5b	280.799	219.495	0.78168
Samsn1	212.576	93.6111	0.440365		Lsp1	397.067	277.441	0.698727
Ndufv1	34.8886	100.733	2.88728		Unc119	343.548	260.511	0.758298
Gpbp1	88.5984	42.714	0.482108		Tap2	224.452	450.173	2.00566
Tax1bp1	295.826	154.962	0.523827		Acsl5	193.418	138.983	0.718564
2410002F23Rik	29.6605	75.0457	2.53016		Rpl35	327.577	229.514	0.700641
S100a8	7336.92	835.232	0.11384		Tsn	212.523	159.264	0.749399
Klf3	167.439	85.7456	0.5121		Rpl14	402.966	643.249	1.59628
Midn	94.5058	47.0665	0.498028		Psma2	348.264	268.109	0.769845
Clec4e	211.382	100.114	0.473618		Soat1	86.9657	137.353	1.5794
Tbce	7.39852	27.6121	3.73211		Sepp1	363.066	256.155	0.705533
Atp1a1	192.768	334.918	1.73742		Cybb	1461.1	2414.01	1.65219
Ncf4	38.2785	13.8549	0.361951		Cyba	874.114	1366.65	1.56347
Dnajb1	56.315	20.487	0.363793		Rnf6	110.626	74.515	0.673579
Scamp1	19.4553	48.1239	2.47356		Atf4	224.644	377.082	1.67858
Rnf25	5.90913	23.0373	3.89859		Pgls	250.759	416.64	1.66152
Gga1	90.5625	45.8936	0.506762		Plin3	82.3063	136.589	1.65952
Etnk2	22.0889	6.17378	0.279497		Tceb2	224.101	175.674	0.783906
Bhlhe41	60.7454	115.277	1.89771		Lrrc59	150.655	115.625	0.767481
Vav2	20.1978	55.7913	2.76225		Atxn10	275.967	210.31	0.762084
Mxd1	640.257	121.881	0.190362		Junb	132.399	286.716	2.16554
Tmed9	204.911	427.626	2.08689		Csnk1d	201.969	156.975	0.777228
Txnl1	17.4416	45.8797	2.63047		Znhit1	80.217	143.812	1.79278
Pygo2	83.8071	149.494	1.78379		Lage3	71.9257	115.436	1.60493
Hba-a2	649.794	85.7135	0.131909		Ubash3b	195.97	143.88	0.734196
Cpne2	60.3438	13.8413	0.229374		Pfkfb4	184.394	144.34	0.78278
Mtmr2	20.4396	4.85376	0.237469		S100a8	128.647	914.904	7.11171
Prdx5	252.17	137.683	0.545992		Gars	225.651	175.499	0.777747
Dip2a	20.6924	5.43928	0.262864		Psmd3	265.58	210.408	0.792259
Cdc42bpb	36.6343	89.6346	2.44674		Rpl28	432.112	315.26	0.72958
Chd7	279.712	115.41	0.412605		Coro1c	703.977	517.384	0.734944
Clec5a	125.595	54.521	0.434101		Hbb-bt	7363.8	1565.93	0.212652
S100a9	4684.37	471.43	0.100639		Nedd9	190.093	139.339	0.733005
Pacs2	17.284	43.1068	2.49403		Tmem259	109.229	164.188	1.50315
Hexim1	43.9494	14.3819	0.327238		R3hdm4	125.25	216.394	1.72771
2210013O21Rik	3.66773	16.0315	4.37095		Cebpb	310.25	617.323	1.98976
Mecom	76.5382	225.609	2.94767		Mtdh	285.483	203.667	0.713413
Slc7a11	348.761	149.716	0.42928		Atp6v1e1	348.576	530.703	1.52249
Casp4	105.679	45.5949	0.431449		Dhrs1	131.398	97.328	0.74071
Ccr1	88.961	38.6205	0.434128		Myo1f	194.121	135.593	0.698495
Socs2	54.3515	101.491	1.86732		Luzp1	111.675	80.8843	0.724281
Hcls1	211.545	123.537	0.583975		Amz1	527.108	356.836	0.67697
Pogz	5.53508	19.4597	3.51571		Cttnbp2nl	217.584	144.867	0.665799
mt-Tm	203.702	103.242	0.506826		Rpl36al	208.488	149.541	0.717262
Wdr45b	29.2968	65.9009	2.24942		Arpc5l	123.073	96.6538	0.785337
Vimp	57.4948	121.673	2.11624		Eif4g1	200.776	158.965	0.791756
1110008F13Rik	87.6717	38.7656	0.442167		Cyb5a	158.193	120.386	0.76101
Tnfaip8	152.367	76.5127	0.50216		Bzw2	184.755	138.426	0.749241
Dopey2	31.5075	10.6776	0.338891		Grina	325.745	542.865	1.66653
Sh3bp2	60.7658	127.904	2.10487		Arl8b	111.383	173.287	1.55578
Slc9a3r1	42.2711	15.5192	0.367136		Tor1aip2	175.724	139.083	0.791487
Zfp687	9.70334	30.6569	3.15942		Cd84	190.622	287.77	1.50963
Gtpbp8	27.8761	6.90025	0.247533		Hsp90aa1	107.435	73.259	0.68189
Nip7	5.23788	19.148	3.65567		Uhmk1	107.406	168.471	1.56854
Ube2h	58.1713	24.8849	0.427786		Commd7	188.108	151.9	0.807516
Adora2a	81.7444	29.7312	0.36371		Clec4n	1133.87	801.528	0.706898
Sec31a	23.6053	55.6106	2.35585		Ccl4	21.4545	177.005	8.25025
Klf9	39.3482	88.6141	2.25205		Gpd2	119.471	93.7335	0.784573
Nvl	4.35908	15.2676	3.50248		Lsm6	127.287	91.3483	0.717657
Vps8	18.5798	4.20594	0.226372		Rps16	453.844	348.418	0.767703
Ago3	14.0993	36.6069	2.59635		Tuba1b	380.802	263.08	0.690857
Zfp710	58.2004	28.9667	0.497706		Slco2b1	103.369	67.4043	0.652074
Tle3	114.812	62.0074	0.540076		Rps23	201.248	152.639	0.758466
Fpr1	252.937	135.606	0.536127		Cers2	195.286	293.968	1.50532
Ier3	1641.09	348.88	0.21259		P2ry13	474.626	319.513	0.673189
Dirc2	32.4142	11.8808	0.36653		Abhd17c	127.31	191.919	1.50749
mt-Nd2	3277.18	5577.55	1.70193		Tmsb10	64.8302	106.535	1.64329
Ogt	20.5096	61.1382	2.98095		Ear2	559.333	380.727	0.68068
Adprh	73.0595	32.8333	0.449405		Lmna	654.139	475.21	0.726467
Arid3a	60.6063	26.8395	0.44285		Klf13	400.89	314.488	0.784474
Plet1	430.092	794.126	1.84641		Alox5	232.07	156.886	0.676026
Rel	136.674	59.3532	0.43427		Rtfdc1	124.785	191.275	1.53283
Rnf213	56.6533	19.6182	0.346285		Fam96a	107.363	81.3372	0.757589
Cflar	463.397	271.435	0.585751		Dpm3	127.175	91.0067	0.7156
N4bp1	246.829	144.427	0.585129		Irg1	19.6625	142.014	7.22259
Rbpj	111.039	60.21	0.542243		H2afy	85.422	130.067	1.52264
Mroh2a	190.49	64.6535	0.339407		Ctsl	233.036	390.032	1.6737
Ppp3ca	130.113	75.5647	0.580763		Fam168b	129.664	102.497	0.79048
Hif1a	149.56	58.2097	0.389205		Rpl11	839.856	663.322	0.789804
Lilrb4	227.648	137.688	0.60483		Tyrobp	1593.86	1172.69	0.735756
Nol11	14.4062	38.6444	2.68247		Prkcd	103.106	160.865	1.5602
Wdr77	5.4644	20.4089	3.73488		Ddx5	256.629	390.027	1.51981
B230354K17Rik	31.0573	11.3958	0.366929		Anxa5	509.08	410.244	0.805854
Tef	33.2049	74.496	2.24352		Rac1	640.384	498.056	0.777746
Dctn5	37.8585	12.1703	0.321468		Plaur	75.297	137.309	1.82356
Mocs2	12.7235	36.2833	2.85167		Tpra1	61.2212	106.323	1.7367
Phf12	12.9164	37.5729	2.90892		Tcirg1	106.478	165.463	1.55395
G0s2	42.8143	12.7902	0.298736		Kazald1	108.686	62.7383	0.577244
Gng12	37.466	9.23705	0.246545		Fcgr3	372.83	591.772	1.58724
Actr3	119.491	61.5697	0.515265		Ccnl1	73.3773	121.082	1.65012
Fyn	10.5513	31.3964	2.97559		Cdh1	288.07	573.565	1.99106
Dhx38	110.68	45.4899	0.411004		Cpsf1	109.504	87.4522	0.798618
Nhlrc3	9.8097	26.9042	2.74261		Elavl1	80.3955	127.478	1.58564
Gm26740	32.4093	11.0125	0.339793		Sdhc	164.832	126.625	0.76821
Smim13	25.5044	8.99481	0.352676		Bst2	67.1713	124.265	1.84998
Slc6a6	197.119	304.295	1.54372		Stom	118.013	176.981	1.49967
G6pdx	38.3209	14.7514	0.384945		Gla	98.3438	151.257	1.53805
Fbxo33	17.3235	3.50408	0.202273		Spint1	111.822	79.215	0.708403
Tbkbp1	53.7967	24.2688	0.451121		S100a9	100.38	885.588	8.82236
Pnrc1	36.4168	14.7842	0.405973		Card11	165.977	127.448	0.767869
RP24-188H2.3	33.5444	9.01822	0.268844		Pip5k1a	106.017	76.7678	0.724106
Gabarap	958.282	649.039	0.677295		Chmp3	241.459	196.929	0.815578
					Fus	1560.6	1088.61	0.697559
					Vapb	385.75	299.845	0.777305
					Cd36	242.973	397.82	1.63731
					P2rx4	120.095	183.69	1.52953
					Vimp	123.428	186.321	1.50955
					6330416G13Rik	114.919	92.2555	0.802784
					Tuba1c	429.511	322.931	0.751857
					Pitpna	468.129	369.652	0.789637
					Sec63	126.159	183.995	1.45845
					Perp	115.482	81.7905	0.708255
					Gde1	87.7772	130.592	1.48776
					Scarb1	177.489	130.344	0.73438
					Spns1	140.847	215.741	1.53174
					Mapk3	787.683	1217.42	1.54558
					Nagpa	260.472	211.065	0.810315
					Ncl	658.076	514.28	0.781491
					Hcar2	189.137	370.668	1.95978
					Lasp1	169.807	268.799	1.58297
					Plcg2	108.259	82.0895	0.758271
					Mtmr6	159.968	124.182	0.776296
					Hmox1	160.218	255.739	1.59619
					Mtch1	113.8	171.403	1.50617
					Map2k2	413.39	300.046	0.72582
					Ddx21	189.624	139.531	0.735834
					Clptm1	164.038	131.06	0.798957
					Sod1	313.466	251.267	0.801576
					Nampt	194.489	318.564	1.63795
					Ahnak	847.04	648.87	0.766045
					Ch25h	98.8675	246.732	2.49559
					Pim1	106.148	200.588	1.88971
					Hsd17b11	264.792	200.923	0.758795
					Dlst	198.404	164.638	0.829813
					Ctsk	770.47	1373.86	1.78314
					Msmo1	99.813	158.7	1.58997
					Cbfb	137.765	109.034	0.791451
					Pfn1	225.532	383.04	1.69838
					Axl	816.289	643.693	0.78856
					Cd52	530.42	783.841	1.47777
					Mmp19	352.078	580.8	1.64963
					Srsf11	162.064	134.016	0.826934
					Pdia6	254.591	361.933	1.42163
					Atg2a	72.0465	112.704	1.56433
					Myl12a	393.193	315.75	0.80304
					Srebf2	164.369	246.589	1.50022
					Lhfpl2	96.2575	148.998	1.54791
					Camkk2	222.279	174.5	0.785049
					Map1lc3a	266.796	199.754	0.748715
					Mgat4b	286.105	231.938	0.810675
					Btg1	93.855	150.157	1.59988
					Slc9a4	171.064	132.418	0.774083
					Pltp	145.305	96.1755	0.661889
					Rps4x	126.952	97.655	0.769228
					Lfng	87.2175	126.728	1.45301
					Stk24	269.876	214.479	0.79473
					Fcgrt	237.428	172.474	0.726423
					Rpl31	820.711	621.664	0.757471
					Myh9	543.74	432.152	0.794777
					Arglu1	131.128	107.557	0.820243
					Bub1b	114.471	83.8202	0.73224
					Pafah1b1	212.989	175.574	0.824336
					Aldoa	602.476	896.739	1.48842
					Chic2	137.26	103.355	0.75299
					Ndufb11	108.493	85.9718	0.792416
					4933426M11Rik	82.4688	137.258	1.66436
					Emd	171.54	135.905	0.792264
					Hspa5	1307.23	2121.62	1.62299
					Gpx1	1996.74	1497.07	0.749755
					Pik3cd	147.867	234.529	1.58608
					Phlpp1	7.25775	3.88425	0.535187
					Toporsos	26.8153	17.8505	0.665685
					Plekhm2	155.121	229.873	1.4819
					Srgn	156.227	409.286	2.61982
					Rpl5	145.611	109.461	0.751733
					Parvg	158.326	121.737	0.768901
					Atp5h	167.935	131.277	0.781715
					Rps17	241.215	192.178	0.796709
					Pmepa1	105.06	77.9257	0.741728
					Cyb5r3	658.675	513.937	0.780259
					Basp1	95.8017	238.742	2.49204
					Phlda1	168.112	109.358	0.650509
					Tonsl	424.659	347.084	0.817322
					Sun2	221.057	179.965	0.814109
					Npepps	106.557	153.302	1.43868
					Fkbp1a	322.37	257.255	0.798012
					Ube2j1	225.484	183.915	0.815645
					Rpsa-ps10	12.122	6.755	0.557251
					Dgkz	246.135	380.238	1.54483
					Ralgds	370.533	573.03	1.5465
					Cnot1	166.704	262.829	1.57662
					Slc25a39	144.783	118.918	0.821355
					Tapbp	391.391	578.854	1.47897
					Rpl35a	204.141	154.827	0.758434
					Gnai3	86.4738	133.964	1.54919
					Ptafr	38.2692	100.177	2.61768
					Rps28	1226.97	977.796	0.796919
					Alox5ap	754.611	590.183	0.782102
					Nucb1	77.6138	114.093	1.47001
					Actr10	118.776	99.7818	0.840082
					Tacc1	159.931	128.286	0.802135
					Ndufb9	156.426	125.703	0.803591
					Actl6a	158.343	132.471	0.836608
					Ppp6r3	166.873	137.661	0.824949
					Rps29	1567.81	1208.59	0.770878
					Deptor	101.948	79.8762	0.7835
					Saraf	339.643	280.755	0.826618
					Anapc11	231.137	195.303	0.844967
					Atp5j	294.591	216.197	0.733887
					Capn2	247.263	203.016	0.821053
					Zswim8	147.844	214.272	1.44931
					Slc16a3	69.405	132.426	1.90801
					Marveld1	206.355	167.917	0.813728
					Kdm4a	129.787	104.163	0.802564
					Atp5e	619.394	886.84	1.43179
					Csnk2b	158.214	230.129	1.45454
					Hdc	57.7307	305.207	5.28674
					Klf10	109.179	89.6568	0.82119
					Atpif1	321.182	261.319	0.813617
					Jagn1	135.795	104.457	0.769224
					Arf1	301.238	246.762	0.819162
					Nasp	130.782	103.483	0.791258
					Wdfy3	121.289	96.5462	0.795998

## Sheet: 6A2 M vs 6A4 M
6A2-Males					6A4-Males						common genes between 6A2 vs 6A4
	average	average	fold			average	average	fold			6A2 Male					6A4 male
Associated_Gene_Name	male	Female	m/f		Associated_Gene_Name	male	Female	m/f			Associated_Gene_Name	male	Female	m/f		Associated_Gene_Name	male	Female	m/f
Xist	371.075	1005.57	0.369021		Xist	677.317	892.771	0.758669			Xist	371.075	1005.57	0.369021		Xist	677.317	892.771	0.758669
Lyz2	12104.3	15057.7	0.803859		Ddx3y	76.174	83.637	0.910769			Fbxw5	97.284	19.36	5.025		Fbxw5	36.6322	21.554	1.69956
Fbxw5	97.284	19.36	5.025		Cenpa	27.076	70.3923	0.384645			Socs3	51.0045	127.811	0.399063		Socs3	65.715	158.931	0.413481
Tnni2	20.8448	10.2538	2.03289		Ifi27l2a	5.377	22.543	0.238522			Fkbp5	119.066	282.897	0.420881		Fkbp5	301.295	146.736	2.05332
Smap2	70.822	190.123	0.372507		Srebf2	133.352	255.727	0.521461			Ikbkb	177.216	98.423	1.80055		Ikbkb	107.377	78.831	1.36212
Smarcb1	107.783	29.1092	3.70271		Plk1	37.463	95.9577	0.390411
Mgp	23.6018	115.692	0.204005		Adamtsl4	29.8065	12.5347	2.37791
Pafah1b3	75.6182	18.026	4.19495		Racgap1	15.7893	41.5877	0.379661
Trim47	121.085	41.1478	2.9427		Adcy6	7.9175	27.2287	0.290777			common	5
Nfix	121.992	42.4278	2.87528		Osbpl3	22.585	59.61	0.378879			up regulated in both	0
Dusp1	149.407	536.977	0.278238		Ptp4a1	75.2025	40.7405	1.84589			6A2 up-6A4 down	1	red
Wars	9.75325	71.7023	0.136024		Kdm6a	7.05625	20.9228	0.337253			6A2 down-6A4 up	1	black
Gp49a	56.2593	146.365	0.384375		Kdm5c	49.7818	86.3962	0.576203			6A2=6A4	3	green
Ndufb5	151.965	63.2495	2.40263		Deptor	119.49	70.166	1.70295
Hcst	63.6788	150.741	0.422439		Ap1s2	211.804	114.093	1.85642
Ubr2	203.255	90.1643	2.25428		Prickle2	31.8585	12.7767	2.49347
Fance	36.6645	119.069	0.307928		Cd276	22.958	6.67925	3.43721
Arl4c	56.4123	10.7782	5.2339		9230112E08Rik	8.74525	1.30225	6.71549
Rnpepl1	177.619	84.3345	2.10612		Dhcr24	14.3915	35.8507	0.401428
Cttnbp2nl	112.811	272.653	0.413752		Dcps	15.901	35.5068	0.44783
Krt15	115.89	33.0607	3.50537		Espl1	5.3185	16.0553	0.331262
Mylip	70.2145	18.2338	3.8508		Bcar3	106.229	57.9408	1.83341
Afap1	229.704	99.9705	2.29772		Zswim8	120.311	203.222	0.592014
Txlna	99.8545	29.8903	3.3407		Marco	1075.82	2559.97	0.42025
Mapkapk5	34.2582	4.6465	7.37292		Dpep2	139.409	88.7432	1.57092
Rfk	115.14	46.1782	2.49338		Pf4	6.57775	28.1825	0.233398
Timm13	199.527	100.754	1.98034		Ppp2r1b	128.966	83.7878	1.5392
Fth1	6546.13	8825.69	0.741714		Josd2	25.2305	59.0005	0.427632
Fuca2	74.9943	19.0763	3.93129		1810043H04Rik	81.593	130.2	0.626676
Bpifa1	2939.96	1020.44	2.88108		Trmt112	18.378	36.7215	0.50047
Pou2f1	99.4317	31.5622	3.15034		Ndc80	2.07925	9.082	0.228942
Tmod3	110.736	44.9965	2.461		Dnajc7	111.379	188.218	0.591752
Trem1	81.504	205.086	0.397413		Casz1	42.7678	74.9748	0.570429
Tpx2	12.1305	56.4	0.21508		Il1a	48.2568	175.386	0.275146
Dguok	108.196	33.4297	3.23652		Vta1	14.505	30.0373	0.4829
Tpm1	138.282	21.4445	6.44836		Ankrd13b	31.3425	14.1385	2.21682
Fam214a	32.7227	2.80175	11.6794		Hspbp1	33.5405	62.2382	0.538905
Sub1	302.19	131.458	2.29875		Psmg4	29.1055	54.2625	0.536383
Rcc2	174.398	74.5075	2.34067		Zbp1	15.3315	32.127	0.477215
Sertad3	98.165	33.2245	2.9546		Acad8	34.8208	20.4675	1.70127
Ccdc80	94.464	24.2235	3.89968		Cmtm7	39.481	78.9838	0.499862
Cyhr1	103.059	29.5145	3.49183		Treml4	21.214	48.7428	0.435224
Rufy1	61.8353	17.0055	3.63619		Srsf10	33.3865	56.0105	0.596076
Zfand6	143.594	66.4308	2.16156		6330416G13Rik	125.711	86.3805	1.45531
Papd4	0.526	14.845	0.0354328		Kifc1	11.3773	26.2118	0.434052
Cd151	44.9498	111.899	0.4017		Khk	47.05	25.3897	1.85311
Nr3c1	165.537	88.9375	1.86127		Cxcl3	80.899	374.42	0.216065
B3gnt8	209.686	90.2657	2.32299		D6Wsu163e	14.8905	28.23	0.527471
Rgp1	9.75525	46.0388	0.211892		Pgap1	67.6342	40.353	1.67606
Mrpl24	53.2257	11.506	4.62591		Ate1	66.5563	42.238	1.57574
Rpl38-ps1	41.8743	107.588	0.389211		Pja2	29.9467	56.2828	0.532077
Mt2	475.407	1092.03	0.435342		Man2a2	66.9898	41.7018	1.6064
Fryl	90.5613	30.0075	3.01795		Pdhb	41.5207	25.1763	1.6492
Mrpl40	9.39225	54.4822	0.172391		Tmem104	55.1357	35.575	1.54985
Stub1	97.7672	42.187	2.31747		Lsm1	9.95475	21.6522	0.459756
Ilvbl	78.7168	26.2695	2.99651		AI607873	68.269	40.2732	1.69515
Hdac7	43.2843	11.4887	3.76753		Ypel2	15.5593	6.4215	2.42299
Kdm5a	123.334	62.2588	1.98099		Gna11	19.697	44.5315	0.442316
Tk2	53.5763	14.1878	3.77623		Zdhhc1	3.72975	12.1075	0.308053
Mt1	883.843	1616.44	0.546784		Aff1	45.2682	74.0228	0.611545
Erp44	30.9835	92.4487	0.335142		Tmem107	3.85175	12.1762	0.316333
Dgat2	32.049	91.4855	0.350318		Itpr3	2.83	11.5668	0.244667
Pbx1	191.192	100.136	1.90932		Mertk	567.274	360.007	1.57573
Mob3b	111.365	48.0962	2.31546		Tma7	13.8015	26.0577	0.52965
H2-Ab1	304.991	631.497	0.482965		Zscan21	10.0005	4.16125	2.40324
Fopnl	63.9892	17.4965	3.65726		Rcbtb1	7.1825	2.057	3.49174
Prune	39.9582	95.4182	0.418769		Dgcr2	39.9855	65.168	0.613576
Snrpd3	414.71	171.178	2.42269		Btbd1	38.8053	24.6982	1.57117
AY036118	23.404	80.0643	0.292315		Ces1d	10.7323	36.6815	0.292579
Brap	43.337	99.9968	0.433384		Cat	59.8745	36.551	1.63811
Ptprf	81.3067	21.4735	3.78638		Hira	21.1077	35.2935	0.598063
P4ha1	11.1365	53.357	0.208717		Ifi27	75.8725	116.59	0.650762
Stom	110.509	51.588	2.14215		Tap2	160.831	323.509	0.497147
Gtf2f1	29.8817	99.0435	0.301703		Rce1	15.2118	25.2568	0.602285
Abcd1	47.4325	11.5667	4.10076		Man1c1	131.505	81.9723	1.60427
Id2	182.014	376.464	0.483483		Eif2b2	54.1557	95.235	0.568654
Pnkp	58.8713	13.3837	4.39871		Tmem63b	48.7963	83.159	0.586783
Prkaca	202.002	85.1585	2.37207		Extl3	91.674	64.165	1.42872
Mettl1	17.7812	59.5185	0.298752		Zscan12	17.1887	8.19725	2.09689
Mrps12	55.2398	15.4865	3.56696		Rab3d	67.9213	41.2245	1.64759
Socs3	51.0045	127.811	0.399063		Tyw3	10.7752	3.958	2.7224
Lman1	78.352	154.443	0.507319		Otud6b	18.872	36.8062	0.512739
Btg1	197.361	90.1285	2.18978		Ythdf1	144.475	103.512	1.39573
Mvb12b	43.572	15.6378	2.78633		Erc2	18.681	9.72025	1.92186
mt-Nd1	3002.75	4386.68	0.684515		Eef1g	82.5665	126.57	0.652336
Stard3	58.787	127.228	0.46206		Foxj2	21.7	38.5995	0.562183
mt-Rnr2	24034.9	29322.9	0.819662		Reps1	6.614	14.8723	0.444721
Sdc4	43.865	8.20925	5.34336		Slc6a4	50.0478	31.1335	1.60752
Trim26	28.9263	91.371	0.31658		Fbxw5	36.6322	21.554	1.69956
Ndufa10	130.413	53.0288	2.4593		Rnf169	66.5495	42.8835	1.55187
Mad1l1	59.3107	13.4145	4.42139		Zfp219	110.143	74.5927	1.47659
Nfkbia	1065.28	1943.68	0.548074		Rnase4	34.6307	18.31	1.89136
Slc1a5	136.716	53.606	2.55038		Hif1an	69.365	44.3405	1.56437
Pltp	128.38	58.105	2.20945		Slc26a6	17.5067	7.63275	2.29364
Fam114a2	98.3433	45.7518	2.1495		Pex13	18.3047	9.0645	2.01939
Fkbp5	119.066	282.897	0.420881		Tnfaip3	37.2615	89.3552	0.417004
Rps7	50.471	114.781	0.439716		Crcp	15.4973	7.208	2.15001
Map3k2	76.7408	38.0062	2.01916		Vgll4	6.80125	18.1178	0.375392
Foxo3	108.38	49.3468	2.19628		Acadm	46.5222	29.2352	1.59131
Lyrm4	41.5697	107.716	0.38592		Lpin1	280.54	176.37	1.59063
Gdap10	47.1833	12.047	3.9166		1700023L04Rik	7.4255	1.824	4.071
Prdm2	68.802	23.1632	2.97031		Gabrp	14.459	55.8077	0.259086
Trim39	8.79875	41.7392	0.210803		Ccdc113	0.2305	4.989	0.0462016
Rap1a	97.1713	36.8445	2.63733		Fosb	14.2935	4.0195	3.55604
Abcf2	4.569	34.9377	0.130775		Mthfsd	7.1775	16.5185	0.434513
Rab11fip1	82.9785	32.519	2.55169		Cd274	80.5962	157.388	0.512086
Cyp4v3	46.288	107.043	0.432423		Ccdc37	4.03525	16.456	0.245215
Chil3	12065.9	9706.83	1.24303		Klhl6	69.8205	39.2968	1.77675
Tnfaip8l2	81.3175	29.347	2.7709		Osbpl9	114.2	77.8775	1.46641
Ap3m1	48.0785	98.8972	0.486146		Twistnb	30.1733	18.3565	1.64374
Set	113.547	56.339	2.01543		Ppp2r3c	12.3752	27.9458	0.442831
Gm17066	40.3473	95.8645	0.420878		Pcyox1l	4.0095	10.867	0.368961
Pxk	52.1752	12.0373	4.33448		Pilrb1	3.311	12.1547	0.272404
Brwd3	36.5365	86.9283	0.420306		Bloc1s3	19.428	38.4637	0.505099
H2-Eb1	289.882	611.686	0.473907		Col4a3bp	94.3768	67.2682	1.40299
Zfp106	143.099	76.9532	1.85956		Nckap1	32.3278	16.9695	1.90505
Ap1b1	104.421	51.4633	2.02904		Sqle	23.8265	44.2865	0.538008
Lactb2	6.07	34.5195	0.175843		Ppp1r35	10.9575	4.2185	2.59749
Zcchc17	22.7	67.5105	0.336244		Ccnb1	11.13	29.073	0.382829
Ncoa5	21.7005	73.7043	0.294427		Ttk	2.002	6.99175	0.286337
Pip5k1c	60.018	126.268	0.475321		Cd80	16.0042	32.8483	0.487218
Cbx3	61.5847	21.0595	2.92432		Acvrl1	62.2865	41.0005	1.51916
Brf1	6.442	39.86	0.161616		Bzrap1	6.34125	18.2447	0.347566
Pign	27.139	4.11925	6.58834		Hs3st3b1	6.01525	19.4937	0.308573
Chm	19.9495	65.5695	0.30425		Pdzd11	8.60325	17.0832	0.503607
Thoc3	44.9693	99.77	0.450729		Rps27	328.003	501.632	0.653872
Sppl3	146.747	71.6192	2.04899		Tmem86a	289.196	205.834	1.40499
Paip2	87.4197	34.5705	2.52874		Ccnb2	23.2805	47.4887	0.490232
Sh3gl1	65.6388	23.9898	2.73612		L1cam	34.019	18.1038	1.87911
Dapk1	183.689	362.351	0.506935		3110043O21Rik	45.7468	28.779	1.58959
Ankrd44	144.214	70.7843	2.03738		Gm17767	1.2285	5.32225	0.230823
Casp8	66.1758	136.702	0.484088		Katnal1	2.43225	10.355	0.234887
Fbxw7	74.3685	29.5497	2.51672		Sgpp1	68.1062	44.545	1.52893
Idh3a	34.4605	6.2385	5.52384		Ch25h	99.376	254.839	0.389956
Csf2rb	1004.17	1577.22	0.636669		Mrc1	1036.72	702.151	1.47649
Ap2a2	141.846	73.0633	1.94141		Slc25a39	149.006	105.657	1.41028
Pabpc1	1257.78	761.882	1.65088		Zadh2	61.8783	39.9915	1.54729
Psmd6	109.289	38.2537	2.85696		Mrfap1	106.656	71.3937	1.49391
Ikbkb	177.216	98.423	1.80055		Zfp606	10.5622	2.40525	4.39133
Akt1	229.554	422.678	0.543096		Cdc45	5.98975	14.4605	0.414215
Eci2	119.159	236.185	0.504516		Rint1	7.37925	2.63275	2.80287
Glrx5	109.854	217.889	0.504174		Ddhd2	78.1215	51.665	1.51208
Nr1h3	52.9243	110.672	0.47821		Napepld	5.897	16.2332	0.363267
Sec61b	86.3287	162.054	0.532716		Sftpd	9.963	34.2028	0.291292
Fam50a	64.3147	25.2177	2.55038		Psmb9	43.7953	74.7112	0.586194
Slc2a1	10.5913	45.7465	0.23152		Gstm5	5.25075	1.83	2.86926
Cndp2	135.647	65.2	2.08047		Dagla	12.3605	4.76225	2.59552
Hmg20b	86.6015	37.4655	2.3115		Eml2	127.014	222.912	0.569794
1810030O07Rik	88.6487	40.902	2.16735		1500011B03Rik	9.7245	3.62675	2.68133
Nbeal1	100.763	42.0658	2.39536		Ltb	14.9895	61.845	0.242372
Srpk1	39.241	109.958	0.356873		Cd82	224.044	351.828	0.636801
Jup	146.538	69.5335	2.10744		C530008M17Rik	32.8002	19.7067	1.66442
Leprot	150.884	80.9158	1.86471		Troap	7.63525	16.3818	0.466083
Ppm1g	88.1577	153.277	0.575152		Gpr84	5.182	21.0582	0.246079
1700020I14Rik	164.1	101.123	1.62278		Piga	10.332	4.13675	2.49761
Lhfpl2	125.893	69.7283	1.80548		Abca1	73.545	43.9958	1.67164
Rsl24d1	9.71325	46.6962	0.208009		Serpine1	229.066	113.792	2.01302
Psmc3	248.029	111.325	2.22796		Orai2	16.438	30.673	0.535911
Taf1	121.82	56.1337	2.17017		Spag11b	12.0995	31.5087	0.384004
Safb2	111.769	53.7225	2.08048		Tmem135	83.649	60.5085	1.38243
Ino80d	139.472	50.8062	2.74517		C1qa	24.5705	76.292	0.322059
Dnttip2	43.9565	11.94	3.68145		Tmem245	74.9855	51.4892	1.45633
Snx12	57.284	122.666	0.466991		Frk	5.92625	14.1675	0.418299
Chd8	101.092	51.2917	1.97091		Hbs1l	35.8005	23.5403	1.52082
Commd3	125.97	65.7905	1.91471		5330426P16Rik	44.1363	19.9485	2.21251
Nsmce2	31.765	74.337	0.427311		1190002F15Rik	6.955	18.4615	0.37673
Snord118	62.9085	24.2172	2.59767		Ms4a8a	679.613	482.168	1.40949
Sin3b	458.061	263.98	1.73521		Zdhhc2	2.59	8.18175	0.316558
Basp1	79.6227	153.721	0.517968		Zkscan14	8.3965	2.828	2.96906
Slc41a3	88.4398	39.9123	2.21585		Psma5	20.167	37.024	0.544701
Eid2b	7.325	34.222	0.214044		Leo1	31.2435	17.2963	1.80637
Hmbox1	41.0915	10.6695	3.85131		Csrp1	117.3	83.584	1.40338
Cd44	3399.77	4436.52	0.766314		Thap11	131.727	94.6262	1.39208
Pqlc2	11.151	42.5862	0.261845		Strip1	39.3025	61.0315	0.643971
Rnf19b	55.158	108.061	0.510434		Notch1	40.4475	27.1773	1.48829
Aldh1b1	17.8513	59.401	0.300521		Ets1	1.382	7.21725	0.191486
Gng5	110.427	204	0.54131		Cdkn2aipnl	44.2542	28.9922	1.52642
Tbc1d9b	116.102	62.5225	1.85696		Pmepa1	129.352	85.455	1.51368
Pkn2	95.8945	38.23	2.50836		Csf2ra	274.947	188.155	1.46127
Sbk1	25.6675	5.01625	5.11687		Eral1	3.87075	10.2505	0.377616
Kdelr1	400.589	664.268	0.603053		Pou2f2	17.3005	43.512	0.397603
Nolc1	48.534	98.4122	0.49317		Tacc2	25.316	13.779	1.83729
Hilpda	31.9965	81.4952	0.392618		Zkscan5	6.092	2.0195	3.01659
Creb1	105.662	42.8625	2.46515		Cd86	10.2447	19.7278	0.519307
Zmym4	54.356	19.3128	2.81451		Plcb3	7.13425	17.6872	0.403356
Add3	87.6775	45.0938	1.94434		Pdxdc1	29.2767	17.7725	1.64731
Galnt6	88.519	42.1358	2.10081		Gm6542	13.9195	6.858	2.02967
Pfn1	334.104	167.391	1.99595		Ccl22	43.6602	76.9115	0.567669
Prkx	69.7212	29.4365	2.36853		Ncoa6	97.5452	66.6072	1.46448
Lman2l	49.5022	16.834	2.94061		8030453O22Rik	11.7698	5.93175	1.9842
Ahcyl1	38.085	94.397	0.403456		Creb3l2	37.8555	24.9958	1.51448
Lpgat1	76.9287	31.7948	2.41954		Bpgm	124.089	49.264	2.51885
Sft2d2	86.4183	42.921	2.01343		Ifi35	39.2745	61.955	0.63392
Mbp	69.2562	135.433	0.51137		Ipo13	25.9585	16.0383	1.61854
Tpt1-ps3	29.9393	5.6035	5.34296		Slc2a6	5.54325	12.8377	0.431793
Mmp8	16.1425	86.6845	0.186221		Ubr7	29.9147	18.6	1.60832
					Pold2	14.1058	26.685	0.528602
					Ndufaf3	18.3182	31.7537	0.576885
					Chchd7	38.6985	24.9847	1.54888
					Il18r1	3.668	10.775	0.340418
					Slc25a13	13.9475	27.1025	0.51462
					Cldn3	7.777	22.8562	0.340257
					Mrpl3	23.2855	38.5877	0.603443
					Ikbkb	107.377	78.831	1.36212
					Fkbp5	301.295	146.736	2.05332
					Ick	11.694	22.0725	0.5298
					Wdfy3	154.528	111.969	1.3801
					Ptges	16.5362	41.1073	0.402271
					Hist1h1e	2.81225	11.0838	0.253727
					Ptpn7	60.1842	40.0145	1.50406
					Gtf2a2	44.4663	31.6397	1.40539
					Chd7	125.454	74.6745	1.68001
					B230307C23Rik	1.33125	5.339	0.249344
					Pspc1	24.9823	40.5782	0.615656
					Atp1b1	14.6062	42.8065	0.341216
					Zfyve9	19.754	10.6295	1.85841
					Gdi2	323.273	244.212	1.32374
					Gnl3l	30.3332	20.6465	1.46917
					Cdc20	11.763	26.0287	0.451923
					Sirt6	4.743	11.775	0.402803
					Bag4	25.495	16.7862	1.5188
					Frrs1	64.2295	48.4145	1.32666
					Socs3	65.715	158.931	0.413481
					Tbcel	12.0318	23.1185	0.520438
					Mndal	6.51975	15.8965	0.410137
					Zfand5	74.5697	44.2695	1.68445
					Il13ra1	82.4128	59.47	1.38579
					Ift52	41.2788	27.0295	1.52717
					Cirh1a	18.6327	9.71225	1.91848
					Enc1	64.535	43.1298	1.4963
					Gbp7	46.9275	30.82	1.52263
					Irgm2	10.71	22.3205	0.479828
					Dmd	6.85	14.9007	0.459708
					Ranbp3	46.5005	34.8872	1.33288
					Fam219b	40.3317	24.106	1.6731
					Cpt1a	331.114	243.794	1.35817
					Ms4a7	3.0295	7.8385	0.38649
					Plxnd1	63.0063	99.747	0.631661
					Slc30a7	40.4385	27.9375	1.44746
					Eif2s3x	14.681	25.9155	0.566495
					Gm12115	4.81525	1.16725	4.12529
					Fzd8	8.43375	3.29525	2.55937
					Brms1	9.9	18.712	0.529072
					Cd2	325.239	227.746	1.42808
					Gars	273.887	210.69	1.29995
					Ssh2	161.925	115.876	1.3974
					Pafah1b2	129.491	101.978	1.26979
					Serf2	72.0295	104.333	0.690379
					Itpkc	11.3963	22.9245	0.497121
					Rbfox2	4.30125	13.3325	0.322614
					Ly6a	12.36	44.533	0.277547
					Cic	151.246	113.926	1.32759
					Sort1	745.101	564.625	1.31964
					Flad1	11.4895	21.5577	0.532964
					Nudt4	50.3312	32.1538	1.56533
					Rab11fip2	6.8315	16.0978	0.424376
					Dgat1	204.326	120.55	1.69495
					Bckdha	26.928	45.5248	0.591502
					P2ry6	39.7037	25.411	1.56246
					Zfp369	19.7922	11.1913	1.76855
					Cnn2	42.22	24.012	1.75829
					Pomgnt2	17.7655	7.10825	2.49928
					Acp5	168.262	266.518	0.631336
					Trappc10	75.8825	54.2567	1.39858
					Ptrh1	3.7835	8.6325	0.438286
					Dock7	8.08025	15.6387	0.516681
					Cks1b	44.198	66.44	0.665232
					Zfp810	14.4123	7.19	2.00449
					Acaca	13.3187	25.1727	0.529094
					Sdc1	5.115	19.1935	0.266496
					Dcaf10	43.7885	30.7393	1.42451
					Zfand3	186.11	143.822	1.29403
					St3gal4	40.6773	63.8357	0.637217
					Senp3	29.3882	56.7415	0.517932
					Tcaim	23.1385	11.1125	2.0822
					Aurka	10.9068	20.8362	0.523451
					0610011F06Rik	8.15	2.797	2.91384
					Prr3	8.7075	3.507	2.48289
					Traf3	32.1245	52.9683	0.606486
					Cfp	75.4647	113.968	0.662154
					Fam96b	16.7003	33.2368	0.502463
					Zfp593	27.2553	44.617	0.610871
					Gab2	328.101	230.36	1.4243
					Zmynd11	79.0317	58.135	1.35945
					Mgat1	273.628	217.451	1.25835
					Piezo1	129.127	187.779	0.687655
					Sepp1	435.608	309.124	1.40917
					Ost4	43.2915	72.4145	0.597829
					Tmc5	14.7453	59.4948	0.247841
					Mapkapk3	114.054	165.812	0.68785
					Usp47	89.3067	63.217	1.4127
					Tmem141	51.5768	34.0733	1.5137
					Birc5	47.9085	92.3358	0.518851
					2700060E02Rik	48.1815	32.7527	1.47107
					Fech	51.166	27.2093	1.88046
					Klf13	487.35	372.361	1.30881
					Usp38	52.9678	34.8522	1.51978
					Bax	90.1178	135.925	0.662994
					Slfn8	2.85425	7.761	0.367768
					Fnbp1l	5.80175	14.5575	0.39854
					Enpp1	122.187	91.265	1.33882
					Cpeb3	9.814	3.69925	2.65297
					Cdca3	19.2587	36.677	0.525091
					Slc9a4	187.679	135.068	1.38951
					Wdr6	4.91475	10.7413	0.457558
					Bod1	17.8528	10.048	1.77675
					F3	4.43675	17.157	0.258597
					Gsto2	0.56625	3.314	0.170866
					Icam4	5.812	1.39075	4.17904
					Klhl36	8.20975	16.0293	0.512173
					Naf1	19.19	11.2415	1.70707
					Abcg4	9.789	3.9025	2.50839
					Lnx2	49.0568	36.2103	1.35478
					Cyb561d2	17.0123	30.74	0.553424
					Ehmt1	27.8283	18.2772	1.52256
					Trip10	7.896	17.0272	0.463727
					Chd3	49.0768	80.7955	0.607419
					Malt1	40.2923	77.8413	0.517621
					Rps6	23.2768	38.6205	0.602705
					Scel	8.2345	3.21025	2.56507
					Elac2	14.1623	24.187	0.585531
					Ppp1r11	47.3837	67.5135	0.701841
					Gon4l	41.651	27.278	1.52691
					Myo7a	116.614	89.5885	1.30167
					Prep	49.5878	35.1797	1.40955
					Rpl28	341.429	498.749	0.68457
					Maff	69.1792	124.362	0.556275
					Ftsj1	15.132	7.177	2.1084
					Cyfip2	9.573	21.3975	0.447389
					Slc25a10	19.3708	31.5525	0.613921
					Lrrc23	17.4187	47.8058	0.364365
					Phf1	77.9638	125.247	0.622481
					Rps11	376.781	611.219	0.616442
					C1qc	11.336	31.7172	0.357408
					Nfat5	23.873	42.2995	0.56438
					Rhbdd1	30.8298	20.4692	1.50615
					Yod1	16.4205	8.93475	1.83782
					Muc5b	24.4707	85.7372	0.285416
					RP23-328G14.2	60.2615	38.7923	1.55344
					Vopp1	103.826	76.773	1.35238
					Hfe	18.2643	9.8565	1.85302
					Kcnk6	77.9875	58.9825	1.32221
					Immp1l	24.8445	14.4655	1.7175
					Csrp2bp	28.6903	19.7855	1.45006
					Inpp5e	16.897	33.7035	0.501343
					Chek2	15.173	25.8295	0.587429
					2810417H13Rik	17.348	31.78	0.545878
					Bpifb1	16.275	57.0887	0.285082
					Cxcl1	10.3897	27.3863	0.379378
					Adgb	7.924	16.7587	0.472828
					Pex12	10.0875	5.02825	2.00617
					Dcun1d3	31.5665	22.5113	1.40225
					Rrs1	34.0213	58.6992	0.579586
					Fos	90.193	56.242	1.60366
					Lrrc10b	2.071	12.12	0.170875
					Ptplb	16.0353	28.4052	0.564517
					Adora2a	8.32125	22.2508	0.373976
					Adam10	83.3203	59.074	1.41044
					Gpalpp1	23.8738	15.459	1.54433
					Eif3j2	120.518	82.4483	1.46174
					Dctn4	106.328	80.1063	1.32734
					Idua	31.7985	21.7572	1.46151
					Ngrn	42.3585	28.9175	1.46481
					Ankrd49	24.379	13.791	1.76775
					Gm16845	7.39	2.91225	2.53756
					Gm16378	2.271	7.41475	0.306281
					AI987944	15.9313	26.611	0.598672
					Usp22	61.753	87.7715	0.703566
					Dnah9	7.916	35.2848	0.224346
					Hivep2	31.546	54.1355	0.582723
					Cenpv	16.7055	9.27375	1.80137
					Pim1	159.56	283.024	0.563769
					Dap3	36.6292	25.717	1.42432
					Foxred1	41.052	26.239	1.56454
					Zfp953	5.05775	1.739	2.90842
					Sdcbp2	2.009	7.68575	0.261393
					Fnbp4	28.3945	17.9393	1.58281
					1700003M02Rik	2.654	14.5367	0.182572
					Wdr46	16.347	28.322	0.577184
					Ppie	6.77675	11.9153	0.568746
					Gskip	28.8888	20.5398	1.40648
					Frs2	4.00175	10.3908	0.385126
					Gins4	29.8737	20.5412	1.45433
					Fbf1	5.37575	12.686	0.423755
					Ap3s1	7.9725	3.84575	2.07307
					Atp2c1	44.3398	32.4198	1.36768
					Mvd	82.99	124.633	0.665875
					Rps15a-ps4	3.52725	8.03325	0.439081
					Irak4	68.4193	41.8782	1.63377
					Ly6e	273.211	378.539	0.721751
					Emc3	81.7707	61.0505	1.3394
					Aacs	8.57025	15.7082	0.545589
					Mtg2	12.026	21.3478	0.563338
					Ifngr1	252.683	190.821	1.32419
					Zfp764	8.587	3.43625	2.49895
					Vdac3	10.652	5.15525	2.06624
					Trim6	13.7517	7.27175	1.89112
					Saa3	11.7878	64.1333	0.183801
					Pgrmc1	59.968	39.3312	1.52469
					Pus3	9.57025	4.512	2.12107
					Mmaa	3.14525	7.48275	0.420333
					Xpc	18.3595	10.7047	1.71508
					Aamdc	19.7765	10.861	1.82087
					Ube2v2	6.937	2.724	2.54662
					Slc6a9	1.721	6.9075	0.249149
					Msr1	24.5752	45.5695	0.539292
					Carhsp1	43.936	28.3045	1.55226
					Nabp1	285.444	199.49	1.43087
					Slco2b1	125.365	83.4878	1.5016
					Eif5a2	6.89475	2.4225	2.84613
					Sord	26.6738	18.499	1.4419
					Fuca1	331.249	259.373	1.27712
					Yif1a	46.185	70.2978	0.656991
					Dolpp1	15.342	24.511	0.625923
					Per1	162.487	96.7843	1.67885
					Heatr2	37.3478	58.628	0.637029
					Knstrn	7.10325	13.985	0.507919
					Derl2	79.088	113.839	0.694734
					Ddx28	104.831	78.583	1.33401
					Det1	15.3327	8.69675	1.76304
					Gemin7	56.595	39.9273	1.41745
					Fmnl3	22.249	38.0228	0.58515
					Rrp8	21	13.0715	1.60655
					Gm6377	4.67775	12.4135	0.376828
					Ring1	10.0135	18.7252	0.534759
					Atn1	7.64325	14.6797	0.520666
					Hdhd2	7.2975	14.0467	0.519515
					Isoc2b	2.79375	7.758	0.360112
					Trmt12	5.7065	11.1665	0.511037
					Fastk	42.568	70.701	0.602085
					Tti2	6.26725	13.3897	0.468063
					Fam210b	14.1945	7.69425	1.84482
					Prc1	27.4865	48.255	0.569609
					Bub1b	97.2595	145.406	0.668882
					Dnajc19	21.8145	35.3115	0.617773
					Akr1c13	24.0957	14.1758	1.69979
					Tnfrsf10b	1.245	4.3345	0.28723
					Fastkd3	21.3095	13.7518	1.54958
					Eif1b	123.048	93.7905	1.31195
					Ppt2	109.808	148.762	0.738141
					Nhlrc1	8.72525	4.448	1.96161
					Gstz1	8.115	15.0617	0.538782
					Hk2	74.5178	126.856	0.587421
					Ttc9c	53.2537	37.0215	1.43845
					Nob1	9.6635	18.4533	0.523675
					Rnf145	75.8898	117.658	0.645002
					Glrx3	77.1735	58.3267	1.32312
					Eepd1	102.21	68.6282	1.48932
					Eps15l1	8.116	14.283	0.568228
					Ctbs	10.284	18.4535	0.557293
					Mrpl54	55.8693	38.051	1.46827
					Sult4a1	4.31875	10.1343	0.426154
					Ptpn13	1.8125	6.05975	0.299105
					Fdx1	31.3385	46.0443	0.680617
					Tnf	32.0662	63.2103	0.507295
					Oas1c	8.18625	3.499	2.3396
					Aes	162.432	122.941	1.32122
					1110059E24Rik	28.8223	18.6247	1.54752
					Fam78b	19.5012	11.3338	1.72064
					Zfp646	7.55525	3.16575	2.38656
					Ptpru	3.87425	14.1782	0.273253
					Cnr2	39.7467	27.003	1.47194
					Atp7a	52.136	34.6307	1.50548
					Mag	21.8175	34.169	0.638517
					Zc3h12d	6.916	16.491	0.41938
					Rreb1	49.0628	34.3315	1.42909
					Flna	1535.17	1190.33	1.2897
					Cox16	4.349	9.03675	0.481257
					Pgm3	10.193	4.673	2.18125
					Usp48	65.8328	50.9065	1.29321
					Ttf1	23.0718	35.9105	0.642479
					Stk4	81.4188	62.6653	1.29926
					Fancf	3.899	1.14975	3.39117
					Rpf2	22.465	33.5205	0.670187
					Arhgap26	36.33	25.4513	1.42743
					Ckap2	6.03725	13.187	0.457818
					Rassf7	5.358	10.9722	0.488323
					Zbtb42	10.2287	17.3935	0.588079
					Grap2	11.9952	21.4738	0.558601
					Slc23a2	78.4472	115.174	0.681119
					Dnajc5	248.868	197.267	1.26158
					Rab3il1	37.892	55.739	0.679811
					Dnajc8	119.525	163.012	0.733225
					Dhrs7	90.9163	65.0415	1.39782
					Vasp	760.989	1103.82	0.689411
					Gstm1	464.854	350.35	1.32683
					Eif4e	55.4333	40.1075	1.38212
					Pip5k1a	83.5147	123.307	0.677293
					Tcf7l2	255.012	193.973	1.31467
					Sfxn5	19.594	11.1392	1.75901
					Strn3	49.1635	71.8247	0.684492
					Egr2	98.1072	167.874	0.584411
					Mtif3	22.737	14.3178	1.58803
					Ppip5k2	42.645	66.137	0.644798

## Sheet: 6A2 F vs 6A4 F
6A2-Females					6A4-Females						common genes between 6A2 vs 6A4
	average	average	fold			average	average	fold			6A2 Female					6A4 Female
Associated_Gene_Name	male	Female	f/m		Associated_Gene_Name	male	Female	f/m			Associated_Gene_Name	male	Female	f/m		Associated_Gene_Name	male	Female	f/m				6A2 Male	6A2 Female	6A4 male	6A4 Female
Xist	371.075	1005.57	2.70988		Xist	677.317	892.771	1.3181			Xist	371.075	1005.57	2.70988		Xist	677.317	892.771	1.3181			Xist	0.369021	2.70988	0.758669	1.3181
Lyz2	12104.3	15057.7	1.244		Ddx3y	76.174	83.637	1.09797			Fbxw5	97.284	19.36	0.199005		Fbxw5	36.6322	21.554	0.588389			Fbxw5	5.025	0.199005	1.69956	0.588389
Fbxw5	97.284	19.36	0.199005		Cenpa	27.076	70.3923	2.5998			Socs3	51.0045	127.811	2.50587		Socs3	65.715	158.931	2.41849			Socs3	0.399063	2.50587	0.413481	2.41849
Tnni2	20.8448	10.2538	0.49191		Ifi27l2a	5.377	22.543	4.19249			Fkbp5	119.066	282.897	2.37597		Fkbp5	301.295	146.736	0.487017			Fkbp5	0.420881	2.37597	2.05332	0.487017
Smap2	70.822	190.123	2.68452		Srebf2	133.352	255.727	1.91769			Ikbkb	177.216	98.423	0.555385		Ikbkb	107.377	78.831	0.734152			Ikbkb	1.80055	0.555385	1.36212	0.734152
Smarcb1	107.783	29.1092	0.270073		Plk1	37.463	95.9577	2.5614
Mgp	23.6018	115.692	4.90184		Adamtsl4	29.8065	12.5347	0.420537
Pafah1b3	75.6182	18.026	0.238382		Racgap1	15.7893	41.5877	2.63393			common	5
Trim47	121.085	41.1478	0.339824		Adcy6	7.9175	27.2287	3.43906			up regulated in both	1
Nfix	121.992	42.4278	0.347792		Osbpl3	22.585	59.61	2.63936			6A2 up-6A4 down	2	red
Dusp1	149.407	536.977	3.59405		Ptp4a1	75.2025	40.7405	0.541744			6A2 down-6A4 up	0
Wars	9.75325	71.7023	7.35163		Kdm6a	7.05625	20.9228	2.96514			6A2=6A4	2	green
Gp49a	56.2593	146.365	2.60163		Kdm5c	49.7818	86.3962	1.7355
Ndufb5	151.965	63.2495	0.416211		Deptor	119.49	70.166	0.587215
Hcst	63.6788	150.741	2.36721		Ap1s2	211.804	114.093	0.538673
Ubr2	203.255	90.1643	0.443601		Prickle2	31.8585	12.7767	0.401047
Fance	36.6645	119.069	3.24751		Cd276	22.958	6.67925	0.290933
Arl4c	56.4123	10.7782	0.191062		9230112E08Rik	8.74525	1.30225	0.148909
Rnpepl1	177.619	84.3345	0.474806		Dhcr24	14.3915	35.8507	2.49111
Cttnbp2nl	112.811	272.653	2.41691		Dcps	15.901	35.5068	2.23299
Krt15	115.89	33.0607	0.285276		Espl1	5.3185	16.0553	3.01876
Mylip	70.2145	18.2338	0.259686		Bcar3	106.229	57.9408	0.545431
Afap1	229.704	99.9705	0.435214		Zswim8	120.311	203.222	1.68915
Txlna	99.8545	29.8903	0.299338		Marco	1075.82	2559.97	2.37954
Mapkapk5	34.2582	4.6465	0.135632		Dpep2	139.409	88.7432	0.63657
Rfk	115.14	46.1782	0.401062		Pf4	6.57775	28.1825	4.28452
Timm13	199.527	100.754	0.504964		Ppp2r1b	128.966	83.7878	0.649687
Fth1	6546.13	8825.69	1.34823		Josd2	25.2305	59.0005	2.33846
Fuca2	74.9943	19.0763	0.25437		1810043H04Rik	81.593	130.2	1.59572
Bpifa1	2939.96	1020.44	0.347092		Trmt112	18.378	36.7215	1.99812
Pou2f1	99.4317	31.5622	0.317426		Ndc80	2.07925	9.082	4.36792
Tmod3	110.736	44.9965	0.406338		Dnajc7	111.379	188.218	1.6899
Trem1	81.504	205.086	2.51627		Casz1	42.7678	74.9748	1.75307
Tpx2	12.1305	56.4	4.64944		Il1a	48.2568	175.386	3.63443
Dguok	108.196	33.4297	0.308974		Vta1	14.505	30.0373	2.07082
Tpm1	138.282	21.4445	0.155078		Ankrd13b	31.3425	14.1385	0.451097
Fam214a	32.7227	2.80175	0.0856209		Hspbp1	33.5405	62.2382	1.85561
Sub1	302.19	131.458	0.435019		Psmg4	29.1055	54.2625	1.86434
Rcc2	174.398	74.5075	0.427227		Zbp1	15.3315	32.127	2.09549
Sertad3	98.165	33.2245	0.338456		Acad8	34.8208	20.4675	0.587796
Ccdc80	94.464	24.2235	0.256431		Cmtm7	39.481	78.9838	2.00055
Cyhr1	103.059	29.5145	0.286383		Treml4	21.214	48.7428	2.29767
Rufy1	61.8353	17.0055	0.275013		Srsf10	33.3865	56.0105	1.67764
Zfand6	143.594	66.4308	0.462628		6330416G13Rik	125.711	86.3805	0.687138
Papd4	0.526	14.845	28.2224		Kifc1	11.3773	26.2118	2.30387
Cd151	44.9498	111.899	2.48942		Khk	47.05	25.3897	0.539633
Nr3c1	165.537	88.9375	0.537267		Cxcl3	80.899	374.42	4.62824
B3gnt8	209.686	90.2657	0.43048		D6Wsu163e	14.8905	28.23	1.89584
Rgp1	9.75525	46.0388	4.71938		Pgap1	67.6342	40.353	0.596636
Mrpl24	53.2257	11.506	0.216174		Ate1	66.5563	42.238	0.634621
Rpl38-ps1	41.8743	107.588	2.5693		Pja2	29.9467	56.2828	1.87943
Mt2	475.407	1092.03	2.29704		Man2a2	66.9898	41.7018	0.622509
Fryl	90.5613	30.0075	0.33135		Pdhb	41.5207	25.1763	0.606353
Mrpl40	9.39225	54.4822	5.80077		Tmem104	55.1357	35.575	0.645226
Stub1	97.7672	42.187	0.431504		Lsm1	9.95475	21.6522	2.17507
Ilvbl	78.7168	26.2695	0.333722		AI607873	68.269	40.2732	0.58992
Hdac7	43.2843	11.4887	0.265426		Ypel2	15.5593	6.4215	0.412713
Kdm5a	123.334	62.2588	0.504797		Gna11	19.697	44.5315	2.26083
Tk2	53.5763	14.1878	0.264814		Zdhhc1	3.72975	12.1075	3.2462
Mt1	883.843	1616.44	1.82887		Aff1	45.2682	74.0228	1.6352
Erp44	30.9835	92.4487	2.98381		Tmem107	3.85175	12.1762	3.16123
Dgat2	32.049	91.4855	2.85455		Itpr3	2.83	11.5668	4.08719
Pbx1	191.192	100.136	0.523746		Mertk	567.274	360.007	0.634627
Mob3b	111.365	48.0962	0.431879		Tma7	13.8015	26.0577	1.88804
H2-Ab1	304.991	631.497	2.07054		Zscan21	10.0005	4.16125	0.416104
Fopnl	63.9892	17.4965	0.273429		Rcbtb1	7.1825	2.057	0.286391
Prune	39.9582	95.4182	2.38795		Dgcr2	39.9855	65.168	1.62979
Snrpd3	414.71	171.178	0.412765		Btbd1	38.8053	24.6982	0.636467
AY036118	23.404	80.0643	3.42096		Ces1d	10.7323	36.6815	3.41788
Brap	43.337	99.9968	2.30742		Cat	59.8745	36.551	0.61046
Ptprf	81.3067	21.4735	0.264105		Hira	21.1077	35.2935	1.67206
P4ha1	11.1365	53.357	4.79118		Ifi27	75.8725	116.59	1.53666
Stom	110.509	51.588	0.466821		Tap2	160.831	323.509	2.01148
Gtf2f1	29.8817	99.0435	3.31451		Rce1	15.2118	25.2568	1.66034
Abcd1	47.4325	11.5667	0.243857		Man1c1	131.505	81.9723	0.623338
Id2	182.014	376.464	2.06832		Eif2b2	54.1557	95.235	1.75854
Pnkp	58.8713	13.3837	0.227339		Tmem63b	48.7963	83.159	1.70421
Prkaca	202.002	85.1585	0.421573		Extl3	91.674	64.165	0.699926
Mettl1	17.7812	59.5185	3.34726		Zscan12	17.1887	8.19725	0.476896
Mrps12	55.2398	15.4865	0.280351		Rab3d	67.9213	41.2245	0.606946
Socs3	51.0045	127.811	2.50587		Tyw3	10.7752	3.958	0.367323
Lman1	78.352	154.443	1.97115		Otud6b	18.872	36.8062	1.95031
Btg1	197.361	90.1285	0.456667		Ythdf1	144.475	103.512	0.716472
Mvb12b	43.572	15.6378	0.358894		Erc2	18.681	9.72025	0.520328
mt-Nd1	3002.75	4386.68	1.46089		Eef1g	82.5665	126.57	1.53295
Stard3	58.787	127.228	2.16422		Foxj2	21.7	38.5995	1.77878
mt-Rnr2	24034.9	29322.9	1.22001		Reps1	6.614	14.8723	2.2486
Sdc4	43.865	8.20925	0.187148		Slc6a4	50.0478	31.1335	0.622076
Trim26	28.9263	91.371	3.15876		Fbxw5	36.6322	21.554	0.588389
Ndufa10	130.413	53.0288	0.40662		Rnf169	66.5495	42.8835	0.644385
Mad1l1	59.3107	13.4145	0.226173		Zfp219	110.143	74.5927	0.677237
Nfkbia	1065.28	1943.68	1.82457		Rnase4	34.6307	18.31	0.528721
Slc1a5	136.716	53.606	0.392098		Hif1an	69.365	44.3405	0.639234
Pltp	128.38	58.105	0.452601		Slc26a6	17.5067	7.63275	0.435989
Fam114a2	98.3433	45.7518	0.465225		Pex13	18.3047	9.0645	0.495199
Fkbp5	119.066	282.897	2.37597		Tnfaip3	37.2615	89.3552	2.39806
Rps7	50.471	114.781	2.2742		Crcp	15.4973	7.208	0.465115
Map3k2	76.7408	38.0062	0.495255		Vgll4	6.80125	18.1178	2.66389
Foxo3	108.38	49.3468	0.455314		Acadm	46.5222	29.2352	0.628414
Lyrm4	41.5697	107.716	2.59121		Lpin1	280.54	176.37	0.628682
Gdap10	47.1833	12.047	0.255324		1700023L04Rik	7.4255	1.824	0.24564
Prdm2	68.802	23.1632	0.336665		Gabrp	14.459	55.8077	3.85972
Trim39	8.79875	41.7392	4.74377		Ccdc113	0.2305	4.989	21.6443
Rap1a	97.1713	36.8445	0.379171		Fosb	14.2935	4.0195	0.281212
Abcf2	4.569	34.9377	7.6467		Mthfsd	7.1775	16.5185	2.30143
Rab11fip1	82.9785	32.519	0.391897		Cd274	80.5962	157.388	1.9528
Cyp4v3	46.288	107.043	2.31255		Ccdc37	4.03525	16.456	4.07806
Chil3	12065.9	9706.83	0.804486		Klhl6	69.8205	39.2968	0.562825
Tnfaip8l2	81.3175	29.347	0.360894		Osbpl9	114.2	77.8775	0.68194
Ap3m1	48.0785	98.8972	2.057		Twistnb	30.1733	18.3565	0.60837
Set	113.547	56.339	0.496172		Ppp2r3c	12.3752	27.9458	2.2582
Gm17066	40.3473	95.8645	2.37599		Pcyox1l	4.0095	10.867	2.71031
Pxk	52.1752	12.0373	0.230708		Pilrb1	3.311	12.1547	3.67102
Brwd3	36.5365	86.9283	2.37922		Bloc1s3	19.428	38.4637	1.97981
H2-Eb1	289.882	611.686	2.11012		Col4a3bp	94.3768	67.2682	0.712763
Zfp106	143.099	76.9532	0.537762		Nckap1	32.3278	16.9695	0.524921
Ap1b1	104.421	51.4633	0.492844		Sqle	23.8265	44.2865	1.85871
Lactb2	6.07	34.5195	5.6869		Ppp1r35	10.9575	4.2185	0.384987
Zcchc17	22.7	67.5105	2.97403		Ccnb1	11.13	29.073	2.61213
Ncoa5	21.7005	73.7043	3.39643		Ttk	2.002	6.99175	3.49238
Pip5k1c	60.018	126.268	2.10384		Cd80	16.0042	32.8483	2.05247
Cbx3	61.5847	21.0595	0.34196		Acvrl1	62.2865	41.0005	0.658257
Brf1	6.442	39.86	6.18752		Bzrap1	6.34125	18.2447	2.87715
Pign	27.139	4.11925	0.151783		Hs3st3b1	6.01525	19.4937	3.24072
Chm	19.9495	65.5695	3.28677		Pdzd11	8.60325	17.0832	1.98567
Thoc3	44.9693	99.77	2.21863		Rps27	328.003	501.632	1.52935
Sppl3	146.747	71.6192	0.488046		Tmem86a	289.196	205.834	0.711747
Paip2	87.4197	34.5705	0.395454		Ccnb2	23.2805	47.4887	2.03985
Sh3gl1	65.6388	23.9898	0.365482		L1cam	34.019	18.1038	0.532166
Dapk1	183.689	362.351	1.97264		3110043O21Rik	45.7468	28.779	0.629094
Ankrd44	144.214	70.7843	0.490827		Gm17767	1.2285	5.32225	4.33232
Casp8	66.1758	136.702	2.06574		Katnal1	2.43225	10.355	4.25737
Fbxw7	74.3685	29.5497	0.397342		Sgpp1	68.1062	44.545	0.654052
Idh3a	34.4605	6.2385	0.181033		Ch25h	99.376	254.839	2.56439
Csf2rb	1004.17	1577.22	1.57067		Mrc1	1036.72	702.151	0.677284
Ap2a2	141.846	73.0633	0.515089		Slc25a39	149.006	105.657	0.70908
Pabpc1	1257.78	761.882	0.605737		Zadh2	61.8783	39.9915	0.646293
Psmd6	109.289	38.2537	0.350023		Mrfap1	106.656	71.3937	0.669385
Ikbkb	177.216	98.423	0.555385		Zfp606	10.5622	2.40525	0.227721
Akt1	229.554	422.678	1.8413		Cdc45	5.98975	14.4605	2.41421
Eci2	119.159	236.185	1.9821		Rint1	7.37925	2.63275	0.356777
Glrx5	109.854	217.889	1.98344		Ddhd2	78.1215	51.665	0.661342
Nr1h3	52.9243	110.672	2.09113		Napepld	5.897	16.2332	2.7528
Sec61b	86.3287	162.054	1.87717		Sftpd	9.963	34.2028	3.43298
Fam50a	64.3147	25.2177	0.392099		Psmb9	43.7953	74.7112	1.70592
Slc2a1	10.5913	45.7465	4.31927		Gstm5	5.25075	1.83	0.348522
Cndp2	135.647	65.2	0.48066		Dagla	12.3605	4.76225	0.38528
Hmg20b	86.6015	37.4655	0.43262		Eml2	127.014	222.912	1.75502
1810030O07Rik	88.6487	40.902	0.461394		1500011B03Rik	9.7245	3.62675	0.37295
Nbeal1	100.763	42.0658	0.417474		Ltb	14.9895	61.845	4.12589
Srpk1	39.241	109.958	2.80212		Cd82	224.044	351.828	1.57035
Jup	146.538	69.5335	0.474508		C530008M17Rik	32.8002	19.7067	0.600811
Leprot	150.884	80.9158	0.536277		Troap	7.63525	16.3818	2.14554
Ppm1g	88.1577	153.277	1.73867		Gpr84	5.182	21.0582	4.06373
1700020I14Rik	164.1	101.123	0.616227		Piga	10.332	4.13675	0.400382
Lhfpl2	125.893	69.7283	0.553868		Abca1	73.545	43.9958	0.598215
Rsl24d1	9.71325	46.6962	4.80748		Serpine1	229.066	113.792	0.496765
Psmc3	248.029	111.325	0.44884		Orai2	16.438	30.673	1.86598
Taf1	121.82	56.1337	0.460794		Spag11b	12.0995	31.5087	2.60414
Safb2	111.769	53.7225	0.480659		Tmem135	83.649	60.5085	0.723362
Ino80d	139.472	50.8062	0.364276		C1qa	24.5705	76.292	3.10502
Dnttip2	43.9565	11.94	0.271632		Tmem245	74.9855	51.4892	0.686656
Snx12	57.284	122.666	2.14137		Frk	5.92625	14.1675	2.39063
Chd8	101.092	51.2917	0.507379		Hbs1l	35.8005	23.5403	0.65754
Commd3	125.97	65.7905	0.522273		5330426P16Rik	44.1363	19.9485	0.451975
Nsmce2	31.765	74.337	2.34022		1190002F15Rik	6.955	18.4615	2.65442
Snord118	62.9085	24.2172	0.38496		Ms4a8a	679.613	482.168	0.709475
Sin3b	458.061	263.98	0.576299		Zdhhc2	2.59	8.18175	3.15898
Basp1	79.6227	153.721	1.93062		Zkscan14	8.3965	2.828	0.336807
Slc41a3	88.4398	39.9123	0.451293		Psma5	20.167	37.024	1.83587
Eid2b	7.325	34.222	4.67195		Leo1	31.2435	17.2963	0.553595
Hmbox1	41.0915	10.6695	0.259652		Csrp1	117.3	83.584	0.712568
Cd44	3399.77	4436.52	1.30495		Thap11	131.727	94.6262	0.71835
Pqlc2	11.151	42.5862	3.81905		Strip1	39.3025	61.0315	1.55287
Rnf19b	55.158	108.061	1.95912		Notch1	40.4475	27.1773	0.671914
Aldh1b1	17.8513	59.401	3.32755		Ets1	1.382	7.21725	5.22232
Gng5	110.427	204	1.84737		Cdkn2aipnl	44.2542	28.9922	0.655129
Tbc1d9b	116.102	62.5225	0.538515		Pmepa1	129.352	85.455	0.66064
Pkn2	95.8945	38.23	0.398667		Csf2ra	274.947	188.155	0.684335
Sbk1	25.6675	5.01625	0.195432		Eral1	3.87075	10.2505	2.64819
Kdelr1	400.589	664.268	1.65823		Pou2f2	17.3005	43.512	2.51507
Nolc1	48.534	98.4122	2.0277		Tacc2	25.316	13.779	0.54428
Hilpda	31.9965	81.4952	2.54701		Zkscan5	6.092	2.0195	0.3315
Creb1	105.662	42.8625	0.405655		Cd86	10.2447	19.7278	1.92564
Zmym4	54.356	19.3128	0.355301		Plcb3	7.13425	17.6872	2.4792
Add3	87.6775	45.0938	0.514314		Pdxdc1	29.2767	17.7725	0.607052
Galnt6	88.519	42.1358	0.476008		Gm6542	13.9195	6.858	0.49269
Pfn1	334.104	167.391	0.501014		Ccl22	43.6602	76.9115	1.76159
Prkx	69.7212	29.4365	0.422203		Ncoa6	97.5452	66.6072	0.682834
Lman2l	49.5022	16.834	0.340065		8030453O22Rik	11.7698	5.93175	0.503983
Ahcyl1	38.085	94.397	2.47859		Creb3l2	37.8555	24.9958	0.660294
Lpgat1	76.9287	31.7948	0.413301		Bpgm	124.089	49.264	0.397006
Sft2d2	86.4183	42.921	0.496666		Ifi35	39.2745	61.955	1.57749
Mbp	69.2562	135.433	1.95553		Ipo13	25.9585	16.0383	0.617842
Tpt1-ps3	29.9393	5.6035	0.187162		Slc2a6	5.54325	12.8377	2.31592
Mmp8	16.1425	86.6845	5.36996		Ubr7	29.9147	18.6	0.621767
					Pold2	14.1058	26.685	1.89178
					Ndufaf3	18.3182	31.7537	1.73345
					Chchd7	38.6985	24.9847	0.645626
					Il18r1	3.668	10.775	2.93757
					Slc25a13	13.9475	27.1025	1.94318
					Cldn3	7.777	22.8562	2.93895
					Mrpl3	23.2855	38.5877	1.65716
					Ikbkb	107.377	78.831	0.734152
					Fkbp5	301.295	146.736	0.487017
					Ick	11.694	22.0725	1.88751
					Wdfy3	154.528	111.969	0.724588
					Ptges	16.5362	41.1073	2.48589
					Hist1h1e	2.81225	11.0838	3.94124
					Ptpn7	60.1842	40.0145	0.664867
					Gtf2a2	44.4663	31.6397	0.711545
					Chd7	125.454	74.6745	0.595235
					B230307C23Rik	1.33125	5.339	4.01052
					Pspc1	24.9823	40.5782	1.62428
					Atp1b1	14.6062	42.8065	2.9307
					Zfyve9	19.754	10.6295	0.538094
					Gdi2	323.273	244.212	0.755436
					Gnl3l	30.3332	20.6465	0.680656
					Cdc20	11.763	26.0287	2.21276
					Sirt6	4.743	11.775	2.48261
					Bag4	25.495	16.7862	0.658413
					Frrs1	64.2295	48.4145	0.753774
					Socs3	65.715	158.931	2.41849
					Tbcel	12.0318	23.1185	1.92146
					Mndal	6.51975	15.8965	2.43821
					Zfand5	74.5697	44.2695	0.593666
					Il13ra1	82.4128	59.47	0.721612
					Ift52	41.2788	27.0295	0.654804
					Cirh1a	18.6327	9.71225	0.521246
					Enc1	64.535	43.1298	0.668316
					Gbp7	46.9275	30.82	0.656758
					Irgm2	10.71	22.3205	2.08408
					Dmd	6.85	14.9007	2.17529
					Ranbp3	46.5005	34.8872	0.750255
					Fam219b	40.3317	24.106	0.597693
					Cpt1a	331.114	243.794	0.736285
					Ms4a7	3.0295	7.8385	2.58739
					Plxnd1	63.0063	99.747	1.58313
					Slc30a7	40.4385	27.9375	0.690864
					Eif2s3x	14.681	25.9155	1.76524
					Gm12115	4.81525	1.16725	0.242407
					Fzd8	8.43375	3.29525	0.390722
					Brms1	9.9	18.712	1.8901
					Cd2	325.239	227.746	0.700243
					Gars	273.887	210.69	0.769258
					Ssh2	161.925	115.876	0.715614
					Pafah1b2	129.491	101.978	0.787533
					Serf2	72.0295	104.333	1.44848
					Itpkc	11.3963	22.9245	2.01158
					Rbfox2	4.30125	13.3325	3.09968
					Ly6a	12.36	44.533	3.60299
					Cic	151.246	113.926	0.753247
					Sort1	745.101	564.625	0.757783
					Flad1	11.4895	21.5577	1.8763
					Nudt4	50.3312	32.1538	0.638843
					Rab11fip2	6.8315	16.0978	2.3564
					Dgat1	204.326	120.55	0.589987
					Bckdha	26.928	45.5248	1.69061
					P2ry6	39.7037	25.411	0.640015
					Zfp369	19.7922	11.1913	0.565436
					Cnn2	42.22	24.012	0.568735
					Pomgnt2	17.7655	7.10825	0.400115
					Acp5	168.262	266.518	1.58394
					Trappc10	75.8825	54.2567	0.71501
					Ptrh1	3.7835	8.6325	2.28162
					Dock7	8.08025	15.6387	1.93543
					Cks1b	44.198	66.44	1.50324
					Zfp810	14.4123	7.19	0.498881
					Acaca	13.3187	25.1727	1.89002
					Sdc1	5.115	19.1935	3.75239
					Dcaf10	43.7885	30.7393	0.701994
					Zfand3	186.11	143.822	0.772779
					St3gal4	40.6773	63.8357	1.56932
					Senp3	29.3882	56.7415	1.93075
					Tcaim	23.1385	11.1125	0.48026
					Aurka	10.9068	20.8362	1.9104
					0610011F06Rik	8.15	2.797	0.34319
					Prr3	8.7075	3.507	0.402756
					Traf3	32.1245	52.9683	1.64884
					Cfp	75.4647	113.968	1.51022
					Fam96b	16.7003	33.2368	1.99019
					Zfp593	27.2553	44.617	1.63701
					Gab2	328.101	230.36	0.7021
					Zmynd11	79.0317	58.135	0.73559
					Mgat1	273.628	217.451	0.794693
					Piezo1	129.127	187.779	1.45422
					Sepp1	435.608	309.124	0.709639
					Ost4	43.2915	72.4145	1.67272
					Tmc5	14.7453	59.4948	4.03484
					Mapkapk3	114.054	165.812	1.45381
					Usp47	89.3067	63.217	0.707864
					Tmem141	51.5768	34.0733	0.660632
					Birc5	47.9085	92.3358	1.92734
					2700060E02Rik	48.1815	32.7527	0.679779
					Fech	51.166	27.2093	0.531784
					Klf13	487.35	372.361	0.764052
					Usp38	52.9678	34.8522	0.65799
					Bax	90.1178	135.925	1.50831
					Slfn8	2.85425	7.761	2.7191
					Fnbp1l	5.80175	14.5575	2.50916
					Enpp1	122.187	91.265	0.746929
					Cpeb3	9.814	3.69925	0.376936
					Cdca3	19.2587	36.677	1.90443
					Slc9a4	187.679	135.068	0.719676
					Wdr6	4.91475	10.7413	2.18551
					Bod1	17.8528	10.048	0.562826
					F3	4.43675	17.157	3.86702
					Gsto2	0.56625	3.314	5.85254
					Icam4	5.812	1.39075	0.239289
					Klhl36	8.20975	16.0293	1.95247
					Naf1	19.19	11.2415	0.5858
					Abcg4	9.789	3.9025	0.398662
					Lnx2	49.0568	36.2103	0.73813
					Cyb561d2	17.0123	30.74	1.80693
					Ehmt1	27.8283	18.2772	0.656788
					Trip10	7.896	17.0272	2.15644
					Chd3	49.0768	80.7955	1.64631
					Malt1	40.2923	77.8413	1.93192
					Rps6	23.2768	38.6205	1.65919
					Scel	8.2345	3.21025	0.389854
					Elac2	14.1623	24.187	1.70785
					Ppp1r11	47.3837	67.5135	1.42482
					Gon4l	41.651	27.278	0.654918
					Myo7a	116.614	89.5885	0.768247
					Prep	49.5878	35.1797	0.709444
					Rpl28	341.429	498.749	1.46077
					Maff	69.1792	124.362	1.79767
					Ftsj1	15.132	7.177	0.474293
					Cyfip2	9.573	21.3975	2.23519
					Slc25a10	19.3708	31.5525	1.62887
					Lrrc23	17.4187	47.8058	2.7445
					Phf1	77.9638	125.247	1.60647
					Rps11	376.781	611.219	1.62221
					C1qc	11.336	31.7172	2.79792
					Nfat5	23.873	42.2995	1.77186
					Rhbdd1	30.8298	20.4692	0.663945
					Yod1	16.4205	8.93475	0.544122
					Muc5b	24.4707	85.7372	3.50366
					RP23-328G14.2	60.2615	38.7923	0.643732
					Vopp1	103.826	76.773	0.739437
					Hfe	18.2643	9.8565	0.539661
					Kcnk6	77.9875	58.9825	0.756307
					Immp1l	24.8445	14.4655	0.582242
					Csrp2bp	28.6903	19.7855	0.689625
					Inpp5e	16.897	33.7035	1.99464
					Chek2	15.173	25.8295	1.70233
					2810417H13Rik	17.348	31.78	1.83191
					Bpifb1	16.275	57.0887	3.50776
					Cxcl1	10.3897	27.3863	2.63589
					Adgb	7.924	16.7587	2.11494
					Pex12	10.0875	5.02825	0.498463
					Dcun1d3	31.5665	22.5113	0.713137
					Rrs1	34.0213	58.6992	1.72537
					Fos	90.193	56.242	0.623574
					Lrrc10b	2.071	12.12	5.85225
					Ptplb	16.0353	28.4052	1.77143
					Adora2a	8.32125	22.2508	2.67397
					Adam10	83.3203	59.074	0.708999
					Gpalpp1	23.8738	15.459	0.647531
					Eif3j2	120.518	82.4483	0.684117
					Dctn4	106.328	80.1063	0.753386
					Idua	31.7985	21.7572	0.684223
					Ngrn	42.3585	28.9175	0.682685
					Ankrd49	24.379	13.791	0.565692
					Gm16845	7.39	2.91225	0.39408
					Gm16378	2.271	7.41475	3.26497
					AI987944	15.9313	26.611	1.67036
					Usp22	61.753	87.7715	1.42133
					Dnah9	7.916	35.2848	4.4574
					Hivep2	31.546	54.1355	1.71608
					Cenpv	16.7055	9.27375	0.555132
					Pim1	159.56	283.024	1.77378
					Dap3	36.6292	25.717	0.702089
					Foxred1	41.052	26.239	0.639165
					Zfp953	5.05775	1.739	0.343829
					Sdcbp2	2.009	7.68575	3.82566
					Fnbp4	28.3945	17.9393	0.631786
					1700003M02Rik	2.654	14.5367	5.4773
					Wdr46	16.347	28.322	1.73255
					Ppie	6.77675	11.9153	1.75825
					Gskip	28.8888	20.5398	0.710995
					Frs2	4.00175	10.3908	2.59655
					Gins4	29.8737	20.5412	0.687602
					Fbf1	5.37575	12.686	2.35986
					Ap3s1	7.9725	3.84575	0.482377
					Atp2c1	44.3398	32.4198	0.731167
					Mvd	82.99	124.633	1.50178
					Rps15a-ps4	3.52725	8.03325	2.27748
					Irak4	68.4193	41.8782	0.612083
					Ly6e	273.211	378.539	1.38552
					Emc3	81.7707	61.0505	0.746606
					Aacs	8.57025	15.7082	1.83288
					Mtg2	12.026	21.3478	1.77513
					Ifngr1	252.683	190.821	0.755179
					Zfp764	8.587	3.43625	0.400169
					Vdac3	10.652	5.15525	0.48397
					Trim6	13.7517	7.27175	0.528787
					Saa3	11.7878	64.1333	5.44067
					Pgrmc1	59.968	39.3312	0.655871
					Pus3	9.57025	4.512	0.471461
					Mmaa	3.14525	7.48275	2.37906
					Xpc	18.3595	10.7047	0.583063
					Aamdc	19.7765	10.861	0.549187
					Ube2v2	6.937	2.724	0.392677
					Slc6a9	1.721	6.9075	4.01365
					Msr1	24.5752	45.5695	1.85428
					Carhsp1	43.936	28.3045	0.644221
					Nabp1	285.444	199.49	0.698875
					Slco2b1	125.365	83.4878	0.665955
					Eif5a2	6.89475	2.4225	0.351354
					Sord	26.6738	18.499	0.693528
					Fuca1	331.249	259.373	0.783014
					Yif1a	46.185	70.2978	1.52209
					Dolpp1	15.342	24.511	1.59764
					Per1	162.487	96.7843	0.595645
					Heatr2	37.3478	58.628	1.56979
					Knstrn	7.10325	13.985	1.96882
					Derl2	79.088	113.839	1.4394
					Ddx28	104.831	78.583	0.74962
					Det1	15.3327	8.69675	0.567201
					Gemin7	56.595	39.9273	0.705491
					Fmnl3	22.249	38.0228	1.70896
					Rrp8	21	13.0715	0.622452
					Gm6377	4.67775	12.4135	2.65373
					Ring1	10.0135	18.7252	1.87
					Atn1	7.64325	14.6797	1.92062
					Hdhd2	7.2975	14.0467	1.92487
					Isoc2b	2.79375	7.758	2.77691
					Trmt12	5.7065	11.1665	1.9568
					Fastk	42.568	70.701	1.6609
					Tti2	6.26725	13.3897	2.13646
					Fam210b	14.1945	7.69425	0.542059
					Prc1	27.4865	48.255	1.75559
					Bub1b	97.2595	145.406	1.49503
					Dnajc19	21.8145	35.3115	1.61872
					Akr1c13	24.0957	14.1758	0.588309
					Tnfrsf10b	1.245	4.3345	3.48153
					Fastkd3	21.3095	13.7518	0.645334
					Eif1b	123.048	93.7905	0.762224
					Ppt2	109.808	148.762	1.35475
					Nhlrc1	8.72525	4.448	0.509785
					Gstz1	8.115	15.0617	1.85604
					Hk2	74.5178	126.856	1.70236
					Ttc9c	53.2537	37.0215	0.69519
					Nob1	9.6635	18.4533	1.90958
					Rnf145	75.8898	117.658	1.55038
					Glrx3	77.1735	58.3267	0.755787
					Eepd1	102.21	68.6282	0.671445
					Eps15l1	8.116	14.283	1.75986
					Ctbs	10.284	18.4535	1.79439
					Mrpl54	55.8693	38.051	0.681072
					Sult4a1	4.31875	10.1343	2.34657
					Ptpn13	1.8125	6.05975	3.34331
					Fdx1	31.3385	46.0443	1.46926
					Tnf	32.0662	63.2103	1.97124
					Oas1c	8.18625	3.499	0.427424
					Aes	162.432	122.941	0.756876
					1110059E24Rik	28.8223	18.6247	0.646193
					Fam78b	19.5012	11.3338	0.581181
					Zfp646	7.55525	3.16575	0.419013
					Ptpru	3.87425	14.1782	3.65961
					Cnr2	39.7467	27.003	0.679376
					Atp7a	52.136	34.6307	0.664239
					Mag	21.8175	34.169	1.56613
					Zc3h12d	6.916	16.491	2.38447
					Rreb1	49.0628	34.3315	0.699747
					Flna	1535.17	1190.33	0.775377
					Cox16	4.349	9.03675	2.07789
					Pgm3	10.193	4.673	0.458452
					Usp48	65.8328	50.9065	0.77327
					Ttf1	23.0718	35.9105	1.55647
					Stk4	81.4188	62.6653	0.769666
					Fancf	3.899	1.14975	0.294883
					Rpf2	22.465	33.5205	1.49212
					Arhgap26	36.33	25.4513	0.700557
					Ckap2	6.03725	13.187	2.18427
					Rassf7	5.358	10.9722	2.04783
					Zbtb42	10.2287	17.3935	1.70045
					Grap2	11.9952	21.4738	1.79019
					Slc23a2	78.4472	115.174	1.46817
					Dnajc5	248.868	197.267	0.792657
					Rab3il1	37.892	55.739	1.471
					Dnajc8	119.525	163.012	1.36384
					Dhrs7	90.9163	65.0415	0.7154
					Vasp	760.989	1103.82	1.45051
					Gstm1	464.854	350.35	0.753677
					Eif4e	55.4333	40.1075	0.723528
					Pip5k1a	83.5147	123.307	1.47647
					Tcf7l2	255.012	193.973	0.760646
					Sfxn5	19.594	11.1392	0.568503
					Strn3	49.1635	71.8247	1.46094
					Egr2	98.1072	167.874	1.71112
					Mtif3	22.737	14.3178	0.629711
					Ppip5k2	42.645	66.137	1.55087

## Sheet: 1A0 M vs KO M
1A0-Males					KO-Males						common genes between 1A0 vs KO
	average	average	fold			average	average	fold			1A0 Male					KO Male
Associated.Gene.Name	male	Female	m/f		Associated_Gene_Name	male	Female	m/f			Associated_Gene_Name	male	Female	m/f		Associated_Gene_Name	male	Female	m/f
Itgam	258.132	25.8395	9.98984		Xist	526.585	523.463	1.00596			Tnip1	302.668	113.968	2.65573		Tnip1	275.8	136.693	2.01767
Lcn2	302.531	62.8187	4.81593		Rpl36al	214.576	809.139	0.26519			Hcar2	1364.44	347.572	3.92563		Hcar2	532.829	126.393	4.21565
Rsad2	204.589	36.9308	5.5398		Cd302	544.712	202.431	2.69085			Mmp8	370.583	63.4351	5.84192		Mmp8	69.414	141.066	0.492069
Inhba	111.759	11.7597	9.50356		Uqcc2	36.571	137.463	0.266042			Mir142hg	182.74	52.1853	3.50175		Mir142hg	123.093	46.5862	2.64227
Marcks	260.291	45.2995	5.746		Ralgds	1028.44	327.018	3.1449			Ets2	484.62	117.346	4.12985		Ets2	209.028	70.0675	2.98324
Kdm7a	169.83	46.7496	3.63276		Abhd17c	290.729	121.753	2.38786			Zfp36	309.084	61.2735	5.04433		Zfp36	202.57	90.0775	2.24884
Nfkbiz	164.888	22.3972	7.362		Icosl	176.678	37.6485	4.69282			Ifitm2	105.393	18.4067	5.72581		Ifitm2	130.598	56.3528	2.31751
Tnip1	302.668	113.968	2.65573		E130309D02Rik	187.056	68.2278	2.74164			Nfe2l2	367.539	137.892	2.66541		Nfe2l2	137.114	108.048	1.26901
Btg2	107.575	26.8232	4.0105		Lrrk1	104.952	39.5115	2.65623			Tnf	107.443	29.937	3.58897		Tnf	100.154	44.8855	2.23132
Hcar2	1364.44	347.572	3.92563		Rps11	656.696	2443.06	0.268801			H2-Ab1	407.535	102.574	3.97309		H2-Ab1	1750.08	1066.05	1.64165
Mmp8	370.583	63.4351	5.84192		Rpl28	486.17	1293.41	0.375883			Grina	825.792	277.98	2.97069		Grina	436.921	211.041	2.07031
Ptger4	10.4855	50.068	0.209425		Gm10320	91.9943	256.604	0.358507			Junb	1261.14	435.06	2.89876		Junb	496.691	230.738	2.15261
Cd52	560.831	233.463	2.40223		Sh3tc1	965.94	334.062	2.8915			Ccnd2	2966.55	5781.31	0.513128		Ccnd2	1860.31	1013.14	1.83618
S100a6	1071.06	246.121	4.35176		Rps6	43.5205	153.635	0.283272			Ube2j2	16.4311	51.9584	0.316236		Ube2j2	124.118	95.4897	1.29981
Mir142hg	182.74	52.1853	3.50175		mt-Co1	552.17	1522.47	0.36268			Bub1b	20.5781	63.3844	0.324656		Bub1b	165.379	113.238	1.46045
Gadd45b	135.944	24.0876	5.64373		Atpif1	296.411	705.594	0.420087			Trib1	541.049	194.407	2.78308		Trib1	192.613	93.1015	2.06885
Ets2	484.62	117.346	4.12985		Atp5j	305.241	993.511	0.307235			Tnfaip2	1878.41	1029.01	1.82546		Tnfaip2	1528.72	938.758	1.62844
Zfp36	309.084	61.2735	5.04433		Eef1a1	195.919	511.532	0.383004			Rsu1	11.575	37.1853	0.311278		Rsu1	97.1637	147.202	0.66007
Bcl2l11	352.694	110.59	3.18922		Serf2	93.1025	217.567	0.427926			Wfdc21	1142.23	581.033	1.96586		Wfdc21	1265.55	2692.78	0.469981
Ppp1r3b	151.962	32.3798	4.69311		Cav2	223.459	87.74	2.54684			Ier5	411.764	204.017	2.01828		Ier5	511.766	249.01	2.0552
Acp2	212.692	88.8966	2.39257		Rpl35	391.389	1096.22	0.357034			Ncor2	66.8229	144.529	0.462348		Ncor2	179.81	119.48	1.50494
Ifitm2	105.393	18.4067	5.72581		Hspe1	239.666	715.095	0.335153			Stk10	21.4019	65.2675	0.327911		Stk10	112.688	196.316	0.574015
Ccdc88b	54.175	13.9439	3.88522		Prkag1	253.341	115.266	2.19788			Skil	146.147	63.9949	2.28373		Skil	156.51	95.0877	1.64596
Snx18	118.163	33.8883	3.48685		Atp5h	160.732	413.785	0.388442			Isg15	288.696	108.287	2.66603		Isg15	288.971	119.329	2.42164
Lst1	61.7061	8.06127	7.65464		Rassf1	132.277	55.227	2.39515			Rab11fip1	120.112	52.6905	2.27958		Rab11fip1	105.823	57.5953	1.83735
Nfe2l2	367.539	137.892	2.66541		Dnajc19	34.4145	115.993	0.296694			Trem1	423.031	156.772	2.69838		Trem1	375.303	197.374	1.90149
Cd97	123.603	24.8568	4.9726		Pabpc4	232.262	85.5362	2.71537			Hspd1	124.354	59.8708	2.07704		Hspd1	58.3312	112.386	0.519028
Dnah12	14.4693	111.858	0.129355		Cox7a2	347.224	885.24	0.392237			Csf1r	270.163	139.902	1.93108		Csf1r	370.984	253.803	1.4617
Cxcr4	96.0983	20.981	4.58025		Rpl10	232.431	864.526	0.268854			Jak2	116.613	50.6729	2.3013		Jak2	112.384	59.7275	1.88161
Cd14	207.586	45.3932	4.57306		Ptbp1	192.455	97.6903	1.97005			Hivep3	171.179	314.98	0.543459		Hivep3	716.571	240.246	2.98266
Sh2b2	358.093	134.259	2.66719		Spi1	1414.95	604.172	2.34197			Mxd1	640.257	121.881	5.25315		Mxd1	233.518	66.6553	3.50337
Rif1	30.8011	92.2838	0.333764		Ube2j1	263.638	125.906	2.09392			Clec5a	125.595	54.521	2.30361		Clec5a	98.7338	151.427	0.652024
Il1b	2913.01	410.33	7.09918		Gm2962	37.176	150.105	0.247667			Socs2	54.3515	101.491	0.535528		Socs2	156.269	67.9838	2.29863
Tnf	107.443	29.937	3.58897		Zc3h12a	251.18	81.7322	3.07321			Tnfaip8	152.367	76.5127	1.9914		Tnfaip8	152.778	108.504	1.40804
Ptafr	237.274	61.354	3.8673		Myh9	692.495	332.638	2.08183			Ube2h	58.1713	24.8849	2.33762		Ube2h	133.749	70.0012	1.91066
Rab44	135.693	41.7891	3.24708		Anapc13	65.7005	162.507	0.404295			Tle3	114.812	62.0074	1.85159		Tle3	127.748	77.156	1.6557
Snap23	160.145	56.532	2.83281		Hcar2	532.829	126.393	4.21565			Ier3	1641.09	348.88	4.70389		Ier3	728.099	262.386	2.77491
Mcfd2	2.09125	21.2625	0.0983542		Ndufa5	317.129	725.609	0.437052			Cflar	463.397	271.435	1.70721		Cflar	285.801	139.805	2.04428
Usp46	2.81483	23.5415	0.119569		Asap1	208.494	104.987	1.9859			Ppp3ca	130.113	75.5647	1.72187		Ppp3ca	199.295	305.564	0.65222
Rtp4	56.1175	9.00441	6.23222		Usmg5	287.705	768.689	0.37428			Gabarap	958.282	649.039	1.47646		Gabarap	2105.88	1420.45	1.48255
Samd9l	53.6605	10.7133	5.00877		Rara	108.311	41.2897	2.6232
H2-Ab1	407.535	102.574	3.97309		Rps13-ps2	225.782	98.357	2.29554
Dgat2	104.418	26.7162	3.90841		Cnot1	187.475	72.9095	2.57134
Ifi203	75.2555	21.1673	3.55526		Hmgcl	1052.06	364.734	2.88446			common	40
Nlrp3	188.882	41.1966	4.5849		Zdhhc9	110.914	47.567	2.33175			up regulated in both	16	yellow background
Ccl5	101.664	16.858	6.03057		Gm10288	111.355	53.0117	2.10058			1A0 up-KO down	6	red
Grina	825.792	277.98	2.97069		Ndufb6	115.281	282.3	0.408363			1A0 down-KO up	2	black
Gbp2	99.6875	16.0439	6.21343		Trf	1922.07	831.48	2.31162			1A0=KO	16	green
Btg1	773.377	282.943	2.73333		Sec61b	216.829	514.889	0.421118
Fkbp15	78.3216	29.6039	2.64565		Snrpd2	64.6552	145.319	0.44492				40
Glul	262.438	596.79	0.439749		Rpl5	180.957	458.008	0.395096
Smox	171.405	31.926	5.36882		Triap1	243.108	115.557	2.10379
Nudt4	93.3096	27.2534	3.42377		Spp1	53.8835	208.334	0.258641
Rasgrp2	61.6833	10.3172	5.97867		Cd82	416.953	175.609	2.37433
Cxcl1	45.6576	10.9001	4.18873		Fmnl1	135.849	62.9285	2.15878
Igf1r	65.693	16.1407	4.07001		Rpl10a	64.3173	162.66	0.395409
Ggct	71.497	19.3018	3.70416		Myeov2	289.405	604.954	0.478392
Junb	1261.14	435.06	2.89876		Furin	1077.79	470.467	2.29089
Slc25a37	101.465	29.4454	3.44587		Rpl30	1045	2915.26	0.358458
Kctd12	127.66	39.14	3.26162		Ndufv3	129.921	268.712	0.483493
Cd2	45.9541	123.268	0.372798		Plekho2	561.736	151.288	3.71302
Spaca6	23.7498	67.5688	0.351491		Rpl35a	255.669	623.444	0.410092
Hsph1	68.2604	20.5047	3.32902		Minos1	174.699	351.509	0.496996
Ccnd2	2966.55	5781.31	0.513128		Prrc2a	103.276	39.1362	2.63888
mt-Nd1	434.368	809.643	0.536493		Srebf2	231.108	109.807	2.10468
Tes	172.467	67.5247	2.55414		Rhoa	4520.69	1591.27	2.84093
Hba-a1	1814.53	188.892	9.60617		Gm11598	32.4413	103.876	0.312308
RP23-59N15.4	108.13	21.5101	5.02696		Kif1c	141.161	77.275	1.82674
Bcl10	125.533	50.0409	2.50861		Snap29	95.3197	211.871	0.449895
Ube2j2	16.4311	51.9584	0.316236		Fabp5	95.0532	272.151	0.349267
Dazap1	52.4261	116.566	0.449753		Jag1	117.469	38.3177	3.06566
Zeb2	711.895	378.38	1.88143		Arl6ip5	427.56	165.727	2.57991
Bub1b	20.5781	63.3844	0.324656		Hist1h1c	117.433	327.603	0.358462
mt-Ta	325.639	124.638	2.61269		Ptk2b	230.796	109.852	2.10097
C3	261.232	101.747	2.56746		Ing1	110.653	44.4495	2.48941
Samhd1	291.503	112.567	2.58958		Scand1	104.614	58.7355	1.7811
I830012O16Rik	26.5935	3.19922	8.31247		Hivep3	716.571	240.246	2.98266
mt-Tq	516.472	171.315	3.01475		Rps15	279.725	566.33	0.493925
Snx20	116.855	50.9399	2.29399		Prmt1	219.658	91.0588	2.41227
Slco2b1	15.6849	54.7129	0.286677		Polr2f	116.294	245.512	0.473682
Ddx54	29.4683	80.3252	0.366862		Memo1	38.8188	123.337	0.314737
Trib1	541.049	194.407	2.78308		Lypla2	421.818	227.636	1.85304
Gmfg	31.9601	6.50102	4.91617		Dync1i2	306.826	161.435	1.90062
Smc6	82.2883	172.774	0.476278		Mfsd5	276.681	147.381	1.87731
Atp5g3	270.558	619.443	0.436777		Ola1	79.0653	162.665	0.486063
Psmb8	105.294	46.2513	2.27656		Ndufs5	29.1978	104.016	0.280704
Cfb	668.691	307.009	2.17809		Rps23	265.25	561.861	0.472093
Net1	20.3515	56.7311	0.358737		Iqsec1	355.526	180.716	1.96732
Clec4d	129.329	39.1151	3.30637		Rps3a1	169.881	390.286	0.435274
Irg1	650.094	91.4471	7.10897		Rps27l	117.737	257.883	0.456553
Ifi204	56.6987	14.8712	3.81266		Ap2b1	129.901	60.0345	2.16377
Zfp36l1	175.236	58.8353	2.97842		Ube2h	133.749	70.0012	1.91066
Ereg	21.0763	3.87204	5.4432		Mir142hg	123.093	46.5862	2.64227
Mbp	20.0969	58.7881	0.341853		Phf1	103.917	41.2022	2.52211
Cmtm7	71.6845	23.4356	3.05879		Fxr2	183.826	98.7947	1.86069
Pigr	19.0261	97.4125	0.195315		Dst	189.833	86.9935	2.18215
Tmem205	15.6767	2.47127	6.34358		Got2	179.951	95.8208	1.878
Htatip2	3.6611	18.2036	0.201119		Sec61g	70.1815	180.695	0.388397
Pilrb2	45.3439	10.1086	4.48568		Tmem11	159.334	87.5312	1.82031
Cdh1	89.7833	180.915	0.496273		Snw1	248.592	134.339	1.85047
Ice1	10.7162	34.2764	0.312641		Aup1	138.341	62.504	2.21331
Tnfaip2	1878.41	1029.01	1.82546		Rae1	113.97	61.1337	1.86426
Kctd20	47.9502	11.8764	4.03744		B4galt1	1088.14	555.501	1.95885
Ccl3	116.097	31.4767	3.68836		Rnf19b	153.302	54.2625	2.82519
Myo1e	19.9013	52.3217	0.380365		Stt3a	65.3307	127.197	0.513618
Rest	318.334	158.552	2.00776		Lfng	103.269	56.1333	1.83971
Sart1	21.9142	54.679	0.400778		Rhoc	721.574	376.248	1.91782
Man2a2	77.3243	31.2214	2.47664		Bst1	323.638	678.261	0.477158
Zdhhc18	47.032	13.6254	3.45179		Fcgr2b	113.174	266.75	0.424271
Gys1	68.4791	25.7107	2.66345		Dnajc7	127.838	64.0648	1.99546
9330104G04Rik	53.9892	11.8197	4.56772		Rps27a	191.297	386.512	0.494934
Ccrl2	86.6808	26.6422	3.25352		Pet100	51.307	120.457	0.425937
Il1rn	1203.24	578.199	2.08102		Ier5	511.766	249.01	2.0552
Cd33	182.46	84.683	2.15462		Gla	107.768	55.996	1.92457
Whsc1l1	185.547	86.5816	2.14303		Ifngr1	255.683	133.861	1.91007
Zfp84	11.8546	39.9452	0.296771		Psma3	96.852	193.922	0.499437
Ell2	77.1143	27.3304	2.82155		Slc25a4	142.74	271.707	0.525345
Snhg9	27.9125	81.2968	0.343341		Herpud1	233.39	125.918	1.85351
Hp	504.886	76.4209	6.60664		Rad23b	319.749	185.168	1.7268
Dgat1	193.256	55.567	3.47789		Ptpn12	537.44	286.201	1.87784
Neurl1b	200.432	400.998	0.499834		Chmp5	51.1545	104.359	0.490179
Fosl2	284.674	137.896	2.0644		Fam129b	787.552	396.339	1.98707
Mt2	337.038	760.664	0.443084		Lpcat3	549.702	235.446	2.33472
Tacc2	11.2872	40.7693	0.276855		Sh3pxd2b	765.518	389.529	1.96524
Etv1	46.3051	9.07106	5.1047		U2af2	450.808	216.669	2.08063
F10	267.253	153.492	1.74115		Ddx39b	254.322	139.141	1.8278
1200014J11Rik	23.3181	56.2716	0.414386		Dhx9	225.607	505.343	0.446444
Gyg	60.8049	21.1964	2.86865		Ociad1	350.175	204.309	1.71395
Arfgap1	14.4779	41.4984	0.34888		Dgkz	299.134	142.942	2.09269
Igsf6	127.823	63.141	2.02441		Mrpl20	63.035	131.795	0.478282
Mndal	53.385	14.8901	3.58526		Tpt1	374.363	934.817	0.400467
Rsu1	11.575	37.1853	0.311278		Dbi	789.422	1587.67	0.497221
Rreb1	15.7559	49.0559	0.321182		Arf5	439.08	223.064	1.9684
Mob3a	99.0931	37.2154	2.66269		Zswim8	164.916	88.577	1.86184
Wfdc21	1142.23	581.033	1.96586		Rpl6	389.689	740.436	0.526297
Gdf15	181.357	95.456	1.8999		Apbb1ip	434.474	252.916	1.71786
Litaf	118.889	48.0114	2.47627		Ndufa1	504.263	1091.78	0.461872
Ier5	411.764	204.017	2.01828		Rcl1	373.924	133.189	2.80746
Ncor2	66.8229	144.529	0.462348		Mrps18c	60.8407	175.542	0.346588
Tap1	215.976	30.6554	7.0453		Rps10	947.332	539.925	1.75456
Arl4c	77.8038	26.4871	2.93743		Mrps21	47.3825	108.632	0.436172
Entpd1	82.6821	22.6058	3.65756		Slc25a5	175.149	420.068	0.416953
Dusp16	123.749	45.1518	2.74073		Kdm6b	109.821	26.8818	4.08532
Stk10	21.4019	65.2675	0.327911		Bcl3	160.751	55.981	2.87153
RP23-122P5.3	82.4644	27.8598	2.95998		Rpl41	100.925	196.546	0.513497
Kctd11	101.056	42.9075	2.3552		Hsd17b12	624.653	342.292	1.82491
Nab1	57.4547	25.125	2.28676		Grina	436.921	211.041	2.07031
Nod1	97.5326	42.5109	2.2943		Aim2	152.633	72.419	2.10763
Birc3	56.0019	17.3835	3.22156		Lims1	57.2752	119.481	0.479369
Gltscr1l	8.27069	30.0123	0.275577		F7	499.978	958.009	0.521893
Ngrn	3.26726	17.4688	0.187034		Psmd4	365.16	185.215	1.97155
Triobp	59.4664	24.5937	2.41796		Ndufa13	301.806	531.274	0.568079
Rpl19	26.2928	6.23008	4.2203		Peli1	180.646	88.8985	2.03205
Skil	146.147	63.9949	2.28373		Polr2m	99.7548	223.798	0.445736
Ndufb8	71.0667	138.616	0.512688		Aldh2	317.683	152.79	2.07921
Fcgr3	505.178	247.352	2.04235		Evl	62.7832	146.971	0.42718
Cdk14	24.0218	59.1823	0.405895		Txn-ps1	59.451	156.084	0.38089
Kpna4	145.156	71.3858	2.0334		Csnk2b	171.882	98.7687	1.74025
Isg15	288.696	108.287	2.66603		Sec13	50.5403	100.339	0.503694
Rheb	8.79013	31.9612	0.275025		Eif2s2	351.207	188.637	1.86181
Lmo7	39.5656	92.1795	0.429223		Psma4	64.3595	154.238	0.417275
Brd9	63.1607	123.213	0.512612		Socs2	156.269	67.9838	2.29863
Angel2	10.6258	36.308	0.292658		Ubc	2580.15	961.772	2.68271
Rab11fip1	120.112	52.6905	2.27958		Mark2	191.698	87.5215	2.19029
Trem1	423.031	156.772	2.69838		Pabpc1	609.632	325.983	1.87014
Hspd1	124.354	59.8708	2.07704		Drap1	152.944	91.0945	1.67896
Dhrs3	16.9266	54.5494	0.310299		Spen	110.799	63.0722	1.7567
Dus1l	4.59772	20.7378	0.221707		Npc1	181.32	110.696	1.638
Csf1r	270.163	139.902	1.93108		Atp6v1a	269.823	478.839	0.563495
Tmem183a	60.8151	26.1052	2.32961		Glrx3	58.791	114.01	0.515668
Lck	43.9584	9.48923	4.63245		Rela	378.976	217.955	1.73878
Krt79	445.729	761.583	0.585266		Pip5k1a	136.461	67.6252	2.0179
Fgd3	46.7357	12.7184	3.67465		Polr2k	30.0292	102.944	0.291705
Jak2	116.613	50.6729	2.3013		Amdhd2	88.5478	163.467	0.541687
Hivep3	171.179	314.98	0.543459		Rps16	614.465	1117.22	0.549996
Samsn1	212.576	93.6111	2.27085		Dnaja2	182.186	114.917	1.58537
Ndufv1	34.8886	100.733	0.346347		Rps4x	144.769	280.36	0.516367
Gpbp1	88.5984	42.714	2.07422		Cap1	119.087	63.5755	1.87316
Tax1bp1	295.826	154.962	1.90903		Snrpd3	408.846	196.352	2.08221
2410002F23Rik	29.6605	75.0457	0.395232		Spcs3	79.6275	225.976	0.352372
S100a8	7336.92	835.232	8.78429		Prpf8	162.081	97.261	1.66645
Klf3	167.439	85.7456	1.95274		Arpc3	1010.06	554.845	1.82043
Midn	94.5058	47.0665	2.00792		Gnai2	1088.6	626.074	1.73878
Clec4e	211.382	100.114	2.11141		Jdp2	104.32	36.616	2.84903
Tbce	7.39852	27.6121	0.267945		2510039O18Rik	122.774	69.8465	1.75777
Atp1a1	192.768	334.918	0.575567		Rpl38-ps2	135.515	241.07	0.562139
Ncf4	38.2785	13.8549	2.76281		Eef1b2	605.011	1143.15	0.529247
Dnajb1	56.315	20.487	2.74881		Marveld1	163.276	94.7392	1.72342
Scamp1	19.4553	48.1239	0.404275		Arhgef2	185.129	105.664	1.75206
Rnf25	5.90913	23.0373	0.256503		Stx16	69.8425	124.049	0.563022
Gga1	90.5625	45.8936	1.97331		Clic1	781.86	379.704	2.05913
Etnk2	22.0889	6.17378	3.57786		Ino80b	25.9968	11.598	2.24149
Bhlhe41	60.7454	115.277	0.526951		Ndufa4	73.979	171.818	0.430567
Vav2	20.1978	55.7913	0.362024		Ftl1	1154.93	2646.44	0.436408
Mxd1	640.257	121.881	5.25315		Lrp1	714.821	431.562	1.65636
Tmed9	204.911	427.626	0.479183		Rpl18a	128.754	246.384	0.522572
Txnl1	17.4416	45.8797	0.38016		Atf4	352.309	185.392	1.90035
Pygo2	83.8071	149.494	0.560606		Tap2	276.924	108.946	2.54185
Hba-a2	649.794	85.7135	7.581		Tmem258	261.979	544.317	0.481299
Cpne2	60.3438	13.8413	4.35969		R3hdm4	123.149	58.9228	2.09001
Mtmr2	20.4396	4.85376	4.21107		Ssh2	111.817	59.7835	1.87036
Prdx5	252.17	137.683	1.83153		Tmem63a	116.582	69.23	1.68399
Dip2a	20.6924	5.43928	3.80425		Aldoc	44.58	102.621	0.434414
Cdc42bpb	36.6343	89.6346	0.408707		Hnrnpa2b1	244.947	560.658	0.436892
Chd7	279.712	115.41	2.42362		Tcf25	428.569	266.529	1.60796
Clec5a	125.595	54.521	2.30361		Cd74	704.118	322.809	2.18122
S100a9	4684.37	471.43	9.93651		Stk40	138.89	78.0993	1.77838
Pacs2	17.284	43.1068	0.400958		Fnip1	117.463	61.3012	1.91617
Hexim1	43.9494	14.3819	3.05588		Tmem50a	833.604	472.398	1.76462
2210013O21Rik	3.66773	16.0315	0.228783		Pycard	63.9557	126.043	0.50741
Mecom	76.5382	225.609	0.339251		Gripap1	118.075	67.948	1.73772
Slc7a11	348.761	149.716	2.32948		Chd8	121.497	71.971	1.68814
Casp4	105.679	45.5949	2.31777		Rpl38	558.69	965.777	0.578487
Ccr1	88.961	38.6205	2.30347		Nf2	103.492	60.2463	1.71781
Socs2	54.3515	101.491	0.535528		Hspd1	58.3312	112.386	0.519028
Hcls1	211.545	123.537	1.7124		Psap	3428.4	7479.63	0.458364
Pogz	5.53508	19.4597	0.284438		Rpl37a	3372.59	6925.63	0.486973
mt-Tm	203.702	103.242	1.97306		Btk	228.634	111.212	2.05583
Wdr45b	29.2968	65.9009	0.444558		Fus	2409.7	1166.51	2.06573
Vimp	57.4948	121.673	0.472536		Plekhg1	212.034	128.144	1.65466
1110008F13Rik	87.6717	38.7656	2.26159		Atp5f1	101.053	189.853	0.532268
Tnfaip8	152.367	76.5127	1.9914		Spcs1	138.32	238.653	0.579588
Dopey2	31.5075	10.6776	2.9508		Ehd1	820.473	370.421	2.21497
Sh3bp2	60.7658	127.904	0.475089		Atp5a1	591.273	1071.87	0.551627
Slc9a3r1	42.2711	15.5192	2.72378		Sin3b	496.865	255.577	1.94409
Zfp687	9.70334	30.6569	0.316514		Magoh	233.853	152.139	1.5371
Gtpbp8	27.8761	6.90025	4.03987		Ccdc47	90.2608	203.339	0.443892
Nip7	5.23788	19.148	0.273547		Anxa1	190.023	436.132	0.4357
Ube2h	58.1713	24.8849	2.33762		Rab11b	147.279	86.4732	1.70317
Adora2a	81.7444	29.7312	2.74944		Cisd2	63.23	110.701	0.57118
Sec31a	23.6053	55.6106	0.424475		Tmed3	81.4333	156.59	0.52004
Klf9	39.3482	88.6141	0.444039		Tmem167	99.5303	193.931	0.513224
Nvl	4.35908	15.2676	0.285512		Snrpe	192.053	347.096	0.553315
Vps8	18.5798	4.20594	4.4175		43532	117.238	215.399	0.544284
Ago3	14.0993	36.6069	0.385156		Rps12	227.614	454.664	0.500621
Zfp710	58.2004	28.9667	2.00922		43710	92.116	166.772	0.552349
Tle3	114.812	62.0074	1.85159		Arpp19	333.107	581.604	0.57274
Fpr1	252.937	135.606	1.86523		Add3	58.5523	103.965	0.563193
Ier3	1641.09	348.88	4.70389		Gde1	180.897	111.672	1.61989
Dirc2	32.4142	11.8808	2.72829		Slc48a1	465.265	261.782	1.7773
mt-Nd2	3277.18	5577.55	0.587567		Dynlrb1	115.32	215.37	0.53545
Ogt	20.5096	61.1382	0.335463		Ppp1r18	320.365	199.567	1.6053
Adprh	73.0595	32.8333	2.22516		Sec24c	55.873	102.364	0.545825
Arid3a	60.6063	26.8395	2.2581		Sema4a	247.442	145.585	1.69964
Plet1	430.092	794.126	0.541591		2410015M20Rik	118.862	206.186	0.576481
Rel	136.674	59.3532	2.30272		Golga2	133.571	82.704	1.61505
Rnf213	56.6533	19.6182	2.88779		Rps25	2874.72	1639.69	1.75321
Cflar	463.397	271.435	1.70721		Psme1	261.264	175.89	1.48539
N4bp1	246.829	144.427	1.70902		Setd8	265.31	152.108	1.74422
Rbpj	111.039	60.21	1.84419		Abracl	233.467	440.526	0.529973
Mroh2a	190.49	64.6535	2.94632		Psme2b	74.1243	132.323	0.560178
Ppp3ca	130.113	75.5647	1.72187		Gm5963	375.963	248.771	1.51128
Hif1a	149.56	58.2097	2.56934		Cisd1	64.5105	119.737	0.538769
Lilrb4	227.648	137.688	1.65336		Ak2	217.644	125.704	1.7314
Nol11	14.4062	38.6444	0.37279		Baz2b	147.218	90.7823	1.62166
Wdr77	5.4644	20.4089	0.267746		Chmp4b	1382.33	813.325	1.6996
B230354K17Rik	31.0573	11.3958	2.72532		Nmt1	215.114	133.972	1.60567
Tef	33.2049	74.496	0.445727		Eif3j2	105.212	52.4195	2.00711
Dctn5	37.8585	12.1703	3.11073		Riok3	225.939	138.847	1.62725
Mocs2	12.7235	36.2833	0.350671		Tspo	181.632	359.074	0.505834
Phf12	12.9164	37.5729	0.34377		Rtfdc1	145.632	88.8345	1.63936
G0s2	42.8143	12.7902	3.34744		Etfa	56.6803	128.624	0.440666
Gng12	37.466	9.23705	4.05605		Urm1	132.791	78.3023	1.69588
Actr3	119.491	61.5697	1.94075		Tle3	127.748	77.156	1.6557
Fyn	10.5513	31.3964	0.336068		Fam120a	251.026	163.881	1.53176
Dhx38	110.68	45.4899	2.43306		Acap2	97.0793	179.881	0.539686
Nhlrc3	9.8097	26.9042	0.364616		1810022K09Rik	128.132	249.155	0.514265
Gm26740	32.4093	11.0125	2.94297		Myd88	223.756	132.45	1.68936
Smim13	25.5044	8.99481	2.83546		Ndufs4	80.3852	137.143	0.586143
Slc6a6	197.119	304.295	0.647788		Trappc1	94.1692	171.242	0.549921
G6pdx	38.3209	14.7514	2.59777		Anxa2	6479.17	3516.63	1.84244
Fbxo33	17.3235	3.50408	4.94382		Mcoln3	63.9635	144.147	0.443738
Tbkbp1	53.7967	24.2688	2.2167		Notch2	137.744	274.039	0.502642
Pnrc1	36.4168	14.7842	2.46322		Tceb1	89.1243	212.673	0.419068
RP24-188H2.3	33.5444	9.01822	3.71962		Btf3	37.2215	100.874	0.368988
Gabarap	958.282	649.039	1.47646		Fabp4	414.801	824.474	0.503109
					Actn1	709.667	458.515	1.54775
					Btbd9	111.709	58.6937	1.90325
					Idh3g	124.589	71.8713	1.73351
					Ski	243.807	155.381	1.56909
					Uqcrq	236.194	386.341	0.611362
					Flna	1279.74	792.734	1.61434
					Rin3	138.066	74.8417	1.84477
					Spryd3	166.856	103.035	1.61942
					Cox8a	404.616	723.757	0.55905
					Ndufb2	62.88	137.723	0.456569
					Hr	140.192	55.107	2.54399
					Rnf10	387.003	208.84	1.8531
					Eny2	54.8798	108.391	0.506314
					Cebpa	949.655	424.294	2.2382
					Ndufab1	58.7945	108.346	0.542655
					Prpf19	101.828	167.939	0.606335
					Rnf6	124.893	68.9898	1.81031
					Bola2	300.871	481.058	0.625436
					Eml2	169.45	82.8272	2.04582
					Ddx24	250.138	143.72	1.74045
					Sec63	165.969	108.218	1.53364
					Ctsa	1471.02	910.432	1.61574
					Ctsl	241.813	466.905	0.517907
					Gnl1	111.117	71.3547	1.55724
					Selt	71.204	137.615	0.517415
					Huwe1	135.13	83.9672	1.60932
					Uqcrb	125.265	226.155	0.553889
					Cflar	285.801	139.805	2.04428
					Ear2	403.867	804.343	0.502109
					Srsf5	206.234	112.364	1.83542
					Gm6265	66.0482	125.685	0.525506
					Mdh2	334.986	214.394	1.56248
					Gak	170.421	111.085	1.53415
					Commd3	77.3135	128.626	0.601072
					Jagn1	134.629	77.5135	1.73684
					Taok3	167.863	98.0418	1.71216
					Nxf1	60.6423	115.251	0.526177
					Eif4h	189.764	325.144	0.58363
					Tagln2	3779.93	2201.14	1.71726
					Atrnl1	51.7375	121.013	0.427538
					Irf5	168.796	97.985	1.72267
					Lcp2	174.666	96.9032	1.80248
					Fam21	113.781	76.5853	1.48567
					Msn	886.571	562.048	1.57739
					Acin1	119.561	72.077	1.6588
					Rpl22	534.312	906.746	0.589263
					Mpdu1	308.412	189.464	1.62782
					S100a10	397.689	697.102	0.570488
					Pdia6	224.986	350.409	0.642067
					Srp14	218.988	354.221	0.618225
					Rps27	565.995	967.519	0.584997
					Wfdc21	1265.55	2692.78	0.469981
					Fam105a	81.559	168.736	0.483353
					Becn1	153.301	102.215	1.4998
					Stom	112.219	69.7493	1.60889
					Ctsc	535.654	968.795	0.552907
					Slc38a1	153.01	102.446	1.49357
					Ppp3r1	430.996	267.091	1.61367
					Uba1	253.979	168.995	1.50288
					Psmd13	285.211	181.33	1.57288
					Ptms	460.407	296.436	1.55314
					Nfkbib	180.343	92.9385	1.94046
					Cnih4	82.2283	139.442	0.589693
					Dohh	115.069	66.4813	1.73084
					Mkks	62.6295	120.008	0.521877
					Spag9	119.763	73.4103	1.63142
					Srxn1	177.375	106.215	1.66995
					Ufc1	80.0748	136.889	0.584959
					Dync1h1	221.868	143.586	1.5452
					Snord89	114.767	25.3795	4.52205
					Ndufc1	120.496	213.334	0.564826
					AI662270	115.167	68.2127	1.68835
					Rab11fip1	105.823	57.5953	1.83735
					Iqgap1	2463.99	1576.62	1.56283
					Atp6v0d2	641.176	1117.01	0.574009
					Atp13a2	91.7722	150.911	0.60812
					Stk38	210.867	123.378	1.70912
					Erp29	149.801	232.663	0.643856
					Eif3i	165.833	249.759	0.663971
					Zbtb22	108.102	65.9015	1.64036
					Prkaca	209.76	126.249	1.66148
					Cln5	257.807	166.848	1.54516
					Ets2	209.028	70.0675	2.98324
					Azin1	74.8785	120.858	0.619559
					Atp5g2	54.2165	118.185	0.458743
					Uhmk1	94.761	158.456	0.598028
					Smarcc2	225.85	113.619	1.98778
					Ly75	360.636	227.89	1.5825
					Fbxl14	87.4762	198.706	0.440231
					Pttg1	101.198	66.7843	1.5153
					2310047M10Rik	173.279	106.906	1.62085
					Ppm1a	165.066	107.281	1.53863
					Vat1	491.273	318.76	1.5412
					Unc119	322.051	212.856	1.513
					Vasp	1444.57	852.315	1.69488
					Rps2	158.564	278.992	0.568347
					Wasf2	127.307	83.9363	1.51671
					Bax	104.455	61.714	1.69257
					Flot2	170.77	109.984	1.55268
					Rpl39	1114.54	2013.32	0.553582
					Setd5	205.912	125.631	1.63902
					Pla2g16	75.2177	140.384	0.535799
					Kctd10	109.125	70.8383	1.54048
					Spn	50.7165	102.928	0.492739
					Gng5	104.076	197.759	0.526276
					Cd274	177.192	83.7225	2.11642
					Rcc2	129.407	79.3332	1.63118
					Pdia3	908.644	469.692	1.93455
					Slc7a5	238.205	129.714	1.83638
					Ctsk	769.175	1601.02	0.480429
					Acaa1b	424.653	201.548	2.10695
					Pltp	105.527	54.6453	1.93112
					Hmgcs1	121.603	195.24	0.622841
					Ndufv2	84.6925	141.938	0.596688
					Slc38a10	219.766	148.936	1.47557
					2310011J03Rik	124.128	79.869	1.55415
					Plec	591.832	361.81	1.63575
					Glyr1	228.673	421.75	0.5422
					Sirt2	359.034	254.216	1.41232
					Krtcap2	232.146	364.04	0.637695
					Axl	804.608	535.335	1.503
					Capn1	232.826	125.019	1.86232
					D8Ertd738e	93.9743	152.251	0.617231
					Rsl1d1	217.382	143.765	1.51207
					Anapc5	164.992	108.383	1.5223
					Cltc	442.226	302.2	1.46335
					Ppp1r9b	163.647	109.772	1.49078
					Hsdl1	104.534	173.172	0.603644
					Skil	156.51	95.0877	1.64596
					Rassf5	123.028	80.279	1.5325
					Lmnb1	356.356	120.545	2.9562
					Exosc5	114.504	77.658	1.47447
					Npepps	113.257	75.5408	1.49928
					Eif3h	364.396	231.617	1.57327
					Lcp1	1418.62	933.536	1.51962
					Atp6v1g1	170.647	283.683	0.60154
					Adrbk1	294.092	211.121	1.393
					Actl6a	129.446	88.7215	1.45901
					Kpnb1	103.044	178.52	0.577215
					Pcnxl3	139.145	58.6095	2.37411
					4930506M07Rik	321.407	202.121	1.59017
					Rpl27	871.094	1414.93	0.615644
					Apoa1bp	110.605	74.317	1.48828
					Cd300lf	1235.45	603.716	2.04642
					Klf13	465.657	314.341	1.48138
					Ncln	291.674	188.199	1.54982
					Zbtb7a	550.256	373.031	1.4751
					Sdhc	143.051	229.918	0.622181
					Cox5b	146.29	224.687	0.651084
					Gm22710	536.368	220.795	2.42926
					Diap2	254.609	160.404	1.5873
					Cpt1a	177.609	289.534	0.61343
					Tcp1	99.2215	162.766	0.609594
					Pip4k2c	129.26	86.2095	1.49936
					Psma1	103.848	169.532	0.612558
					Rabl6	105.553	64.2618	1.64254
					Crip1	190.854	444.356	0.429508
					Hebp1	190.632	332.228	0.573797
					Slc12a7	121.543	80.6855	1.50638
					Rab8a	353.186	234.053	1.50901
					1810037I17Rik	299.657	600.125	0.499324
					Pik3cd	166.571	99.7103	1.67055
					Gatad2a	124.996	87.409	1.43002
					Pea15a	116.842	77.6538	1.50465
					Syk	554.614	353.507	1.56889
					Stk24	388.366	258.469	1.50257
					Jak2	112.384	59.7275	1.88161
					Ifrd1	965.206	497.192	1.94131
					Cox14	103.073	154.276	0.668108
					Shfm1	740.105	1281.83	0.577381
					Mapkapk3	197.731	128.539	1.53829
					Rpl14	490.28	320.676	1.5289
					Tnfrsf21	231.653	140.975	1.64322
					Uxs1	182.64	116.469	1.56815
					D17Wsu92e	378.502	268.544	1.40946
					Cox7b	283.428	455.24	0.622592
					Ctbp1	221.145	156.06	1.41705
					Cd200r4	70.3155	112.036	0.627617
					Map2k3	268.438	183.068	1.46633
					Ctss	4608.74	8404.72	0.548351
					Vps72	129.037	67.3398	1.91621
					Zfp36	202.57	90.0775	2.24884
					Mgat4b	288.297	201.211	1.43281
					Atf6b	167.546	112.672	1.48702
					Rbms1	548.707	390.71	1.40438
					Dynll1	59.6213	101.496	0.587428
					Rnf7	61.403	108.941	0.563635
					Fn1	566.618	995.266	0.569313
					Rpn2	176.906	271.561	0.65144
					Coro1a	325.871	191.813	1.6989
					Ube2z	162.04	248.038	0.653289
					Yeats4	179.723	126.788	1.41751
					Rbx1	70.8153	112.973	0.626833
					Kmt2e	162.641	116.695	1.39372
					Junb	496.691	230.738	2.15261
					Eif3e	85.811	153.084	0.560549
					Ube2d3	332.213	223.772	1.4846
					Capns1	408.204	293.616	1.39027
					Gcnt2	130.196	210.704	0.617907
					Rpl36	231.287	383.03	0.603835
					Sap30l	102.659	65.4073	1.56954
					Bak1	121.817	85.156	1.43051
					Txn1	1808.15	3087.14	0.585704
					Rnf220	126.828	86.638	1.46388
					Snx5	524.27	339.227	1.54548
					Plaur	152.549	83.5445	1.82596
					Pim3	127.514	73.3893	1.73751
					Prcp	158.71	105.336	1.50671
					Abhd12	1078.97	699.012	1.54356
					Csnk1g2	246.611	172.925	1.42612
					Dnajb11	66.724	116.882	0.570869
					Aff1	105.231	69.0182	1.52468
					Rmnd5a	64.9022	121.716	0.533228
					Ppp3ca	199.295	305.564	0.65222
					Csde1	469.418	332.087	1.41354
					Mpeg1	866.298	1404.45	0.616823
					Gsk3b	154.324	101.886	1.51467
					2510009E07Rik	57.2137	101.169	0.565525
					Rps28	1404.56	2203.22	0.637503
					Ndufa3	226.322	333.253	0.679129
					Jup	215.304	109.32	1.96949
					Slirp	124.899	187.145	0.66739
					Supt6	108.789	71.3102	1.52557
					Ccdc115	218.702	153.524	1.42454
					Fam168b	118.734	177.588	0.668593
					Ccnl1	110.031	67.4378	1.6316
					Gabarap	2105.88	1420.45	1.48255
					Tubb4b	59.2332	100.536	0.589176
					Uqcrfs1	287.255	453.607	0.633268
					Snd1	118.877	82.227	1.44572
					Znfx1	65.1755	101.906	0.639563
					Rps18	356.965	526.714	0.67772
					Cmip	216.38	152.969	1.41453
					Pik3r1	111.552	71.0685	1.56964
					Ndufb5	133.229	205.394	0.648654
					Pafah1b1	221.397	326.743	0.677589
					Tonsl	439.23	305.096	1.43965
					Phb2	325.647	234.051	1.39135
					Brd4	148.79	96.6128	1.54007
					Tapbp	526.427	352.986	1.49135
					Atf5	183.983	105.558	1.74296
					Rsrp1	105.888	196.281	0.539473
					Mapkapk2	854.339	520.654	1.6409
					Pigt	271.427	156.043	1.73943
					Id2	266.579	174.087	1.5313
					Scap	182.36	119.66	1.52398
					Cic	115.311	80.1245	1.43914
					Isg15	288.971	119.329	2.42164
					Cpne5	111.409	65.181	1.70923
					Stk17b	86.7027	141.221	0.61395
					Hpcal1	450.718	277.776	1.62259
					Pbxip1	240.963	162.841	1.47974
					Actn4	250.431	177.768	1.40875
					Cct2	134.402	200.622	0.669929
					Tnfaip2	1528.72	938.758	1.62844
					Ccnd2	1860.31	1013.14	1.83618
					Fam96a	91.893	144.222	0.637164
					Copb2	102.937	71.7043	1.43558
					9130401M01Rik	83.8695	133.103	0.630107
					Rab1	242.9	377.594	0.643282
					Arhgef7	109.993	66.665	1.64993
					Hsp90ab1	1697.95	1021.62	1.66203
					Pex11a	325.763	203.045	1.60439
					Mbnl2	109.286	68.5233	1.59487
					Ap3d1	137.018	206.358	0.663984
					Magt1	85.654	133.549	0.641365
					Fam129a	246.712	151.936	1.62379
					BC031181	99.8815	143.81	0.69454
					Chmp1a	230.286	158.83	1.4499
					Tnip1	275.8	136.693	2.01767
					Tmx1	171.856	243.902	0.70461
					Nr4a1	215.039	70.3642	3.05608
					Cops5	149.804	104.669	1.43122
					AI413582	122.187	82.7495	1.47659
					Mxd1	233.518	66.6553	3.50337
					Tgfbr2	137.444	231.34	0.594118
					Fbxl5	113.835	179.393	0.634557
					Pqlc3	61.761	115.654	0.534015
					Rpl23	980.488	1635.19	0.599617
					Klc1	225.983	144.212	1.56702
					H2-K1	1569.84	1005.34	1.5615
					Psmc1	237.986	156.585	1.51985
					Bsg	268.429	199.52	1.34537
					Rbm17	81.4315	147.119	0.553507
					Ms4a6d	211.407	326.26	0.64797
					Eif5b	269.144	198.039	1.35904
					Tpp2	67.9047	115.733	0.586738
					Hdgf	344.645	239.028	1.44186
					Nucb1	74.154	112.079	0.661621
					Itgax	977.618	631.208	1.5488
					Rpl31	962.326	1536.57	0.626283
					Pfkfb4	172.41	126.002	1.36831
					Actr1b	119.198	81.594	1.46087
					Arl8b	110.824	166.068	0.667341
					Tsc22d4	103.231	69.3533	1.48847
					Naaa	290.851	479.946	0.606009
					Rpl36a	1234.06	2047.15	0.60282
					Fkbp2	144.917	227.007	0.638382
					Zfp703	199.577	118.369	1.68606
					Saraf	326.706	236.792	1.37972
					Vapb	346.01	242.571	1.42643
					Ddb1	568.413	409.919	1.38665
					Mmp8	69.414	141.066	0.492069
					Ndufb3	227.744	380.267	0.598907
					Ear1	1200.25	701.42	1.71118
					Ndufb9	137.862	205.227	0.671754
					Nop58	98.7318	153.018	0.645232
					Elovl1	158.145	110.727	1.42824
					Trib1	192.613	93.1015	2.06885
					Tkt	659.673	427.929	1.54155
					Tnf	100.154	44.8855	2.23132
					Skiv2l	67.175	109.61	0.612853
					Slc7a1	105.091	63.6963	1.64988
					Tardbp	69.624	116.187	0.59924
					Smarcd2	120.585	82.9507	1.45369
					Hyou1	110.123	61.653	1.78618
					Hmox1	144.613	92.33	1.56626
					Atp6v1f	1002.71	697.605	1.43737
					Rpl9	318.808	468.36	0.68069
					Psmb4	237.124	350.53	0.676473
					Rpl13a	690.875	1062.51	0.650229
					Sec22b	113.38	81.8347	1.38547
					Polr2g	68.1825	106.8	0.638416
					Sdf4	189.889	140.328	1.35318
					Rsu1	97.1637	147.202	0.66007
					Cox6b1	635.028	959.323	0.661954
					Pmepa1	195.152	124.531	1.5671
					Polr2a	183.985	135.718	1.35564
					Rnh1	1358.49	963.104	1.41053
					Ccnk	123.507	187.89	0.65734
					Qsox1	937.338	593.054	1.58053
					Nagpa	196.077	143.553	1.36589
					Irf8	136.845	94.2043	1.45264
					Hnrnpl	170	115.993	1.46561
					Grpel1	204.963	134.861	1.51981
					Card11	105.246	74.0393	1.4215
					Adam17	537.158	346.401	1.55068
					Lima1	766.382	482.322	1.58894
					Vcp	303.67	201.746	1.50521
					Srp9	75.3915	135.214	0.55757
					Hsd3b7	127.526	199.363	0.639666
					Ncor2	179.81	119.48	1.50494
					Rpl22l1	75.794	124.903	0.606822
					Mertk	372.732	245.469	1.51845
					C77080	69.336	117.477	0.59021
					Stk10	112.688	196.316	0.574015
					Purb	312.487	227.607	1.37292
					Mtdh	563.66	376.7	1.49631
					Calm2	177.257	264.63	0.669831
					Eif1ax	83.7302	124.85	0.670645
					Sqstm1	718.443	492.596	1.45848
					Swi5	278.007	182.842	1.52048
					Rpl37	1998.91	3192.47	0.626132
					Tpd52l2	73.4335	112.192	0.654534
					Fnta	129.529	185.767	0.697268
					Mapre1	334.756	243.106	1.377
					Stat6	118.912	86.2168	1.37922
					Plek	1440.86	842.166	1.7109
					Isoc2a	389.956	266.521	1.46314
					Slc39a11	151.725	102.372	1.4821
					Chmp2a	200.119	305.707	0.654608
					Sae1	259.555	170.529	1.52206
					Atp6ap1	1032.82	739.854	1.39598
					Emd	195.461	137.938	1.41702
					Mfsd12	230.37	155.506	1.48143
					Pfkfb3	121.651	69.7347	1.74449
					Srp19	71.01	108.787	0.652743
					Nabp1	165.946	270.986	0.612378
					Hck	593.209	377.3	1.57225
					Mpc2	124.069	206.648	0.600384
					Lhfpl2	74.8858	117.014	0.639971
					Rtcb	141.653	106.491	1.33018
					S100a11	526.694	355.828	1.48019
					Tm9sf4	166.801	99.8113	1.67117
					Irf1	175.645	96.873	1.81314
					Actb	13132.1	8168.34	1.60768
					Pim1	345.244	188.928	1.82738
					Atg3	77.5182	120.816	0.641625
					Cux1	102.123	69.7583	1.46395
					Atxn1	157.713	112.208	1.40554
					Rrs1	67.8377	124.041	0.546898
					P2ry14	408.208	276.199	1.47795
					Itpr2	208.002	146.86	1.41633
					Nfkb2	108.002	61.904	1.74466
					Cbfb	115.107	168.185	0.684406
					Bcl2a1d	171.973	348.869	0.492944
					Anp32a	156.504	98.0652	1.59591
					Naca	150.72	249.178	0.604869
					Rpl3	769.672	1135.6	0.677769
					Higd2a	136.042	103.348	1.31635
					Taok1	149.71	107.556	1.39193
					Crlf2	302.333	231.664	1.30505
					Atp6v1e1	520.16	383.972	1.35468
					Batf	108.378	70.3402	1.54077
					Tnfrsf1b	243.474	156.392	1.55682
					Rab5c	2786.89	1879.19	1.48303
					Mgst1	186.462	296.938	0.627951
					Hsbp1	108.52	163.421	0.664055
					Acaa1a	199.452	149.602	1.33322
					Lamtor1	288.989	187.481	1.54143
					43723	117.525	193.165	0.608416
					Sumo3	320.005	227.206	1.40844
					Gtf2h5	120.656	173.722	0.694534
					Tuba1c	561.35	387.354	1.44919
					Cotl1	4070.33	2796.34	1.45559
					Rps7	415.427	626.109	0.663506
					Snrpb2	160.268	117.006	1.36974
					Lrp10	173.302	123.77	1.40019
					St13	299.835	226.228	1.32537
					Sec11a	97.3817	141.365	0.688865
					Rps29	1772.04	1236.54	1.43306
					Pebp1	91.1192	132.844	0.685913
					Myl12b	259.955	185.209	1.40357
					Sidt2	125.326	94.0933	1.33194
					Ergic1	150.084	108.459	1.38379
					Rpl18	225.567	323.747	0.69674
					Tnfaip8	152.778	108.504	1.40804
					Ndufb10	100.837	155.438	0.64873
					Ifitm2	130.598	56.3528	2.31751
					Cox7c	225.274	319.103	0.705959
					Rplp0	704.875	1022.74	0.689202
					Rplp2	993.263	1451.28	0.684403
					Fam49b	316.121	220.394	1.43435
					Itpripl2	316.854	230.321	1.37571
					Psmb5	161.65	225.005	0.718428
					Gba	126.009	181.66	0.693656
					Gab2	262.672	178.617	1.47059
					Gar1	73.5457	114.211	0.643946
					Esrra	81.7627	119.431	0.684602
					Ddost	176.872	133.481	1.32507
					Zfp770	14.7745	7.835	1.88571
					Usp14	139.339	105.662	1.31872
					Eif4b	104.297	149.428	0.697975
					Ndufa6	214.606	307.828	0.69716
					Hvcn1	246.763	361.71	0.682213
					Mbnl1	255.685	192.972	1.32498
					Ehbp1l1	152.985	115.097	1.32918
					H2-DMb1	695.379	481.517	1.44414
					Bhlhe40	134.375	90.1515	1.49055
					Actr10	145.373	112.326	1.2942
					Arl2bp	99.1532	169.349	0.585498
					Gas5	236.435	347.968	0.679474
					Pgrmc2	117.022	84.8245	1.37958
					Abhd16a	127.401	92.4903	1.37745
					Tyrobp	1656.32	2449.06	0.676309
					Chtf8	202.05	125.801	1.60611
					Cdc42ep3	98.8893	166.85	0.592685
					Mgat1	225.685	176.601	1.27794
					Ufd1l	104.358	80.2295	1.30074
					Ddx50	66.806	102.05	0.654638
					Atp6v0a1	133.051	92.0433	1.44553
					Mob1a	184.415	288.951	0.638222
					Mdm2	134.821	96.5247	1.39675
					Atp6ap2	649.543	490.394	1.32453
					Gpcpd1	184.247	299.127	0.615949
					Hsd17b4	91.7097	142.918	0.641696
					H2-Eb1	810.211	445.362	1.81922
					Col4a3bp	90.2825	127.375	0.708796
					Psmd6	78.2668	112.242	0.697302
					Stx6	137.982	105.757	1.30472
					Arhgap1	106.237	74.986	1.41675
					Sp1	137.627	102.475	1.34303
					Snrnp70	329.282	459.4	0.716766
					Ddx6	485.125	349.065	1.38979
					Ubb	284.471	210.377	1.3522
					Fam32a	119.474	80.4485	1.4851
					Coro1c	700.299	1025.91	0.682615
					Gp49a	177.939	111.163	1.60069
					Higd1a	97.3482	136.446	0.713455
					Sec61a1	650.218	477.41	1.36197
					Ppig	121.973	86.1172	1.41636
					Atp10a	141.138	99.1905	1.4229
					Ythdf3	101.323	75.049	1.35009
					Pdcd6	77.6308	115.704	0.670943
					Hdc	373.147	74.67	4.99727
					Acads	209.739	158.501	1.32327
					Rab31	124.199	93.5695	1.32734
					Jak1	264.956	203.226	1.30375
					Csf1r	370.984	253.803	1.4617
					Wipf1	97.869	132.978	0.735976
					Ndufc2	132.494	188.688	0.702184
					Smdt1	167.662	234.452	0.715126
					Edf1	182.304	132.025	1.38082
					Soat1	72.0508	102.439	0.703351
					Ier3	728.099	262.386	2.77491
					Mgrn1	112.565	86.2608	1.30494
					Ccl9	1044.24	520.549	2.00603
					Marco	1334.49	2384.62	0.559625
					Rps24	2695.03	1821.55	1.47952
					Ube2j2	124.118	95.4897	1.29981
					Pcbp1	190.016	258.006	0.73648
					Ssbp4	147.496	104.183	1.41574
					Zranb2	75.8265	107.025	0.708493
					2310036O22Rik	160.476	121.184	1.32423
					Hspa4	188.404	283.267	0.665109
					Vav1	166.212	229.004	0.725808
					Rnf13	70.312	107.936	0.651422
					Eef2	2514.79	1797.83	1.39879
					Rpl12	334.596	468.552	0.714106
					Kdelr2	68.8417	102.008	0.674865
					Tmem189	69.55	103.614	0.671238
					Anxa4	340.292	259.685	1.3104
					Fth1	11275.4	19108.9	0.590063
					Ewsr1	107.425	167.154	0.642667
					Snrpf	78.4555	140.78	0.557292
					Emc7	122.767	186.745	0.657401
					Ncor1	152.204	107.189	1.41997
					Dstn	264.475	180.534	1.46495
					Fas	252.566	140.337	1.79971
					Canx	339.544	463.361	0.732785
					Per1	202.036	116.518	1.73394
					Bub1b	165.379	113.238	1.46045
					Tmem109	129.69	99.5855	1.30229
					Rps20	1944.48	1409.43	1.37962
					Sptlc2	116.305	160.726	0.723622
					Tmbim6	1200.64	879.357	1.36536
					Hexa	505.064	721.332	0.700183
					Cwc15	255.088	196.041	1.30119
					Hnrnpa0	617.525	477.754	1.29256
					Abcf1	129.946	101.331	1.2824
					Zfp706	111.411	153.697	0.724873
					Bud31	103.642	77.4537	1.33811
					Ankrd11	158.858	109.338	1.45291
					Atp5c1	76.223	109.769	0.694393
					Ccdc88a	260.093	179.576	1.44837
					Wbp11	68.7905	100.687	0.683211
					Cd24a	141.741	229.755	0.616924
					Nampt	432.411	304.702	1.41913
					Hsd17b11	277.601	399.691	0.694539
					Aamp	282.631	215.803	1.30967
					Mllt6	190.865	114.694	1.66412
					Hnrnpul2	221.794	160.687	1.38029
					Creg1	580.703	441.134	1.31639
					Pa2g4	192.208	148.03	1.29844
					Tcirg1	151.62	213.677	0.709577
					Arpc5l	88.3065	119.551	0.738651
					2010107E04Rik	354.817	494.616	0.717359
					B4galnt1	132.184	182.45	0.724496
					Man2a1	99.2185	153.1	0.648062
					Dynlt3	117.459	89.4675	1.31287
					Trem1	375.303	197.374	1.90149
					Nfe2l2	137.114	108.048	1.26901
					Adam15	146.558	104.953	1.39642
					Mfsd7c	97.6232	150.269	0.649658
					Cib2	106.178	71.385	1.4874
					Prdx2	118.269	159.062	0.743541
					Tmcc3	145.475	113.821	1.2781
					Malsu1	80.6808	124.057	0.650351
					Dock10	258.875	189.283	1.36766
					Fermt3	126.305	93.3985	1.35233
					Arhgap30	183.503	138.558	1.32438
					E430025E21Rik	85.0285	118.217	0.719258
					Ddx21	246.834	178.385	1.38371
					Srsf7	82.3923	113.839	0.723764
					Ppt2	123.085	163.888	0.751035
					Qdpr	144.287	199.573	0.722979
					Cox7a2l	107.678	77.3247	1.39254
					Clec5a	98.7338	151.427	0.652024
					Nckap1l	232.208	181.252	1.28113
					Srsf3	185.111	258.962	0.714819
					Slc7a2	1482.48	966.836	1.53334
					Fau	712.713	962.464	0.740509
					Pld3	953.688	717.668	1.32887
					H2-Ab1	1750.08	1066.05	1.64165
					Rock1	175.232	138.294	1.2671
					Tmem86a	204.806	155.817	1.3144
					Far1	96.9385	135.397	0.715958
					Sdha	157.129	212.793	0.738412
					Pkm	569.259	448.851	1.26826
					Lgals3bp	177.819	259.866	0.684273
					Sub1	235.004	305.964	0.768076
					Cybb	2186.9	1600.81	1.36612
					Cers2	206.119	158.225	1.3027
					Grn	910.191	675.668	1.3471
					Fgr	403.207	292.225	1.37978
					Zcchc2	79.0035	113.797	0.694246
					Picalm	837.72	638.201	1.31263
					Ufsp2	112.623	155.739	0.723148
					Arhgdia	402.255	316.787	1.2698
					Cct8	217.688	293.285	0.74224
					Ddx3x	385.718	281.781	1.36886
					Hdlbp	148.744	112.331	1.32416

## Sheet: 1A0 F vs KO F
1A0-Females					KO-Females						common genes between 1A0 vs KO
	average	average				average	average				1A0 Female					KO Female
Associated.Gene.Name	male	Female	f/m		Associated_Gene_Name	male	Female	f/m			Associated_Gene_Name	male	Female	f/m		Associated_Gene_Name	male	Female	f/m				1A0 Male	1A0 Female	KO male	KO Female
Itgam	258.132	25.8395	0.100102		Xist	526.585	523.463	0.994071			Tnip1	302.668	113.968	0.376544		Tnip1	275.8	136.693	0.495622			Tnip1	2.65573	0.376544	2.01767	0.495622
Lcn2	302.531	62.8187	0.207644		Rpl36al	214.576	809.139	3.77088			Hcar2	1364.44	347.572	0.254736		Hcar2	532.829	126.393	0.237211			Hcar2	3.92563	0.254736	4.21565	0.237211
Rsad2	204.589	36.9308	0.180512		Cd302	544.712	202.431	0.37163			Mmp8	370.583	63.4351	0.171177		Mmp8	69.414	141.066	2.03223			Mmp8	5.84192	0.171177	0.492069	2.03223
Inhba	111.759	11.7597	0.105224		Uqcc2	36.571	137.463	3.7588			Mir142hg	182.74	52.1853	0.285572		Mir142hg	123.093	46.5862	0.378462			Mir142hg	3.50175	0.285572	2.64227	0.378462
Marcks	260.291	45.2995	0.174034		Ralgds	1028.44	327.018	0.317975			Ets2	484.62	117.346	0.242139		Ets2	209.028	70.0675	0.335206			Ets2	4.12985	0.242139	2.98324	0.335206
Kdm7a	169.83	46.7496	0.275273		Abhd17c	290.729	121.753	0.418785			Zfp36	309.084	61.2735	0.198242		Zfp36	202.57	90.0775	0.444673			Zfp36	5.04433	0.198242	2.24884	0.444673
Nfkbiz	164.888	22.3972	0.135833		Icosl	176.678	37.6485	0.213092			Ifitm2	105.393	18.4067	0.174648		Ifitm2	130.598	56.3528	0.431497			Ifitm2	5.72581	0.174648	2.31751	0.431497
Tnip1	302.668	113.968	0.376544		E130309D02Rik	187.056	68.2278	0.364746			Nfe2l2	367.539	137.892	0.375176		Nfe2l2	137.114	108.048	0.788015			Nfe2l2	2.66541	0.375176	1.26901	0.788015
Btg2	107.575	26.8232	0.249346		Lrrk1	104.952	39.5115	0.376474			Tnf	107.443	29.937	0.278632		Tnf	100.154	44.8855	0.448166			Tnf	3.58897	0.278632	2.23132	0.448166
Hcar2	1364.44	347.572	0.254736		Rps11	656.696	2443.06	3.72022			H2-Ab1	407.535	102.574	0.251693		H2-Ab1	1750.08	1066.05	0.609144			H2-Ab1	3.97309	0.251693	1.64165	0.609144
Mmp8	370.583	63.4351	0.171177		Rpl28	486.17	1293.41	2.6604			Grina	825.792	277.98	0.336622		Grina	436.921	211.041	0.48302			Grina	2.97069	0.336622	2.07031	0.48302
Ptger4	10.4855	50.068	4.77499		Gm10320	91.9943	256.604	2.78935			Junb	1261.14	435.06	0.344975		Junb	496.691	230.738	0.464551			Junb	2.89876	0.344975	2.15261	0.464551
Cd52	560.831	233.463	0.41628		Sh3tc1	965.94	334.062	0.345841			Ccnd2	2966.55	5781.31	1.94883		Ccnd2	1860.31	1013.14	0.54461			Ccnd2	0.513128	1.94883	1.83618	0.54461
S100a6	1071.06	246.121	0.229792		Rps6	43.5205	153.635	3.53018			Ube2j2	16.4311	51.9584	3.1622		Ube2j2	124.118	95.4897	0.769345			Ube2j2	0.316236	3.1622	1.29981	0.769345
Mir142hg	182.74	52.1853	0.285572		mt-Co1	552.17	1522.47	2.75725			Bub1b	20.5781	63.3844	3.08019		Bub1b	165.379	113.238	0.68472			Bub1b	0.324656	3.08019	1.46045	0.68472
Gadd45b	135.944	24.0876	0.177188		Atpif1	296.411	705.594	2.38046			Trib1	541.049	194.407	0.359315		Trib1	192.613	93.1015	0.483361			Trib1	2.78308	0.359315	2.06885	0.483361
Ets2	484.62	117.346	0.242139		Atp5j	305.241	993.511	3.25484			Tnfaip2	1878.41	1029.01	0.547807		Tnfaip2	1528.72	938.758	0.614083			Tnfaip2	1.82546	0.547807	1.62844	0.614083
Zfp36	309.084	61.2735	0.198242		Eef1a1	195.919	511.532	2.61094			Rsu1	11.575	37.1853	3.21256		Rsu1	97.1637	147.202	1.51499			Rsu1	0.311278	3.21256	0.66007	1.51499
Bcl2l11	352.694	110.59	0.313557		Serf2	93.1025	217.567	2.33685			Wfdc21	1142.23	581.033	0.508683		Wfdc21	1265.55	2692.78	2.12775			Wfdc21	1.96586	0.508683	0.469981	2.12775
Ppp1r3b	151.962	32.3798	0.213078		Cav2	223.459	87.74	0.392644			Ier5	411.764	204.017	0.49547		Ier5	511.766	249.01	0.486571			Ier5	2.01828	0.49547	2.0552	0.486571
Acp2	212.692	88.8966	0.41796		Rpl35	391.389	1096.22	2.80085			Ncor2	66.8229	144.529	2.16287		Ncor2	179.81	119.48	0.664477			Ncor2	0.462348	2.16287	1.50494	0.664477
Ifitm2	105.393	18.4067	0.174648		Hspe1	239.666	715.095	2.98371			Stk10	21.4019	65.2675	3.04961		Stk10	112.688	196.316	1.74212			Stk10	0.327911	3.04961	0.574015	1.74212
Ccdc88b	54.175	13.9439	0.257386		Prkag1	253.341	115.266	0.454984			Skil	146.147	63.9949	0.43788		Skil	156.51	95.0877	0.60755			Skil	2.28373	0.43788	1.64596	0.60755
Snx18	118.163	33.8883	0.286792		Atp5h	160.732	413.785	2.57439			Isg15	288.696	108.287	0.375089		Isg15	288.971	119.329	0.412943			Isg15	2.66603	0.375089	2.42164	0.412943
Lst1	61.7061	8.06127	0.13064		Rassf1	132.277	55.227	0.41751			Rab11fip1	120.112	52.6905	0.438677		Rab11fip1	105.823	57.5953	0.544262			Rab11fip1	2.27958	0.438677	1.83735	0.544262
Nfe2l2	367.539	137.892	0.375176		Dnajc19	34.4145	115.993	3.37048			Trem1	423.031	156.772	0.370592		Trem1	375.303	197.374	0.525905			Trem1	2.69838	0.370592	1.90149	0.525905
Cd97	123.603	24.8568	0.201102		Pabpc4	232.262	85.5362	0.368274			Hspd1	124.354	59.8708	0.481455		Hspd1	58.3312	112.386	1.92668			Hspd1	2.07704	0.481455	0.519028	1.92668
Dnah12	14.4693	111.858	7.73068		Cox7a2	347.224	885.24	2.54948			Csf1r	270.163	139.902	0.517844		Csf1r	370.984	253.803	0.684136			Csf1r	1.93108	0.517844	1.4617	0.684136
Cxcr4	96.0983	20.981	0.218329		Rpl10	232.431	864.526	3.71949			Jak2	116.613	50.6729	0.434538		Jak2	112.384	59.7275	0.531459			Jak2	2.3013	0.434538	1.88161	0.531459
Cd14	207.586	45.3932	0.218672		Ptbp1	192.455	97.6903	0.5076			Hivep3	171.179	314.98	1.84007		Hivep3	716.571	240.246	0.335271			Hivep3	0.543459	1.84007	2.98266	0.335271
Sh2b2	358.093	134.259	0.374927		Spi1	1414.95	604.172	0.426991			Mxd1	640.257	121.881	0.190362		Mxd1	233.518	66.6553	0.28544			Mxd1	5.25315	0.190362	3.50337	0.28544
Rif1	30.8011	92.2838	2.99612		Ube2j1	263.638	125.906	0.477573			Clec5a	125.595	54.521	0.434101		Clec5a	98.7338	151.427	1.53369			Clec5a	2.30361	0.434101	0.652024	1.53369
Il1b	2913.01	410.33	0.140861		Gm2962	37.176	150.105	4.03769			Socs2	54.3515	101.491	1.86732		Socs2	156.269	67.9838	0.435042			Socs2	0.535528	1.86732	2.29863	0.435042
Tnf	107.443	29.937	0.278632		Zc3h12a	251.18	81.7322	0.325393			Tnfaip8	152.367	76.5127	0.50216		Tnfaip8	152.778	108.504	0.710206			Tnfaip8	1.9914	0.50216	1.40804	0.710206
Ptafr	237.274	61.354	0.258578		Myh9	692.495	332.638	0.480347			Ube2h	58.1713	24.8849	0.427786		Ube2h	133.749	70.0012	0.52338			Ube2h	2.33762	0.427786	1.91066	0.52338
Rab44	135.693	41.7891	0.307969		Anapc13	65.7005	162.507	2.47344			Tle3	114.812	62.0074	0.540076		Tle3	127.748	77.156	0.603973			Tle3	1.85159	0.540076	1.6557	0.603973
Snap23	160.145	56.532	0.353006		Hcar2	532.829	126.393	0.237211			Ier3	1641.09	348.88	0.21259		Ier3	728.099	262.386	0.360372			Ier3	4.70389	0.21259	2.77491	0.360372
Mcfd2	2.09125	21.2625	10.1673		Ndufa5	317.129	725.609	2.28806			Cflar	463.397	271.435	0.585751		Cflar	285.801	139.805	0.489169			Cflar	1.70721	0.585751	2.04428	0.489169
Usp46	2.81483	23.5415	8.36339		Asap1	208.494	104.987	0.50355			Ppp3ca	130.113	75.5647	0.580763		Ppp3ca	199.295	305.564	1.53323			Ppp3ca	1.72187	0.580763	0.65222	1.53323
Rtp4	56.1175	9.00441	0.160456		Usmg5	287.705	768.689	2.67179			Gabarap	958.282	649.039	0.677295		Gabarap	2105.88	1420.45	0.674515			Gabarap	1.47646	0.677295	1.48255	0.674515
Samd9l	53.6605	10.7133	0.19965		Rara	108.311	41.2897	0.381214
H2-Ab1	407.535	102.574	0.251693		Rps13-ps2	225.782	98.357	0.435628
Dgat2	104.418	26.7162	0.255858		Cnot1	187.475	72.9095	0.388902
Ifi203	75.2555	21.1673	0.281273		Hmgcl	1052.06	364.734	0.346685			common	40
Nlrp3	188.882	41.1966	0.218107		Zdhhc9	110.914	47.567	0.428862			up regulated in both	0	yellow background
Ccl5	101.664	16.858	0.165822		Gm10288	111.355	53.0117	0.47606			1A0 up-KO down	8	red
Grina	825.792	277.98	0.336622		Ndufb6	115.281	282.3	2.4488			1A0 down-KO up	3	black
Gbp2	99.6875	16.0439	0.160942		Trf	1922.07	831.48	0.432597			1A0=KO	29	green
Btg1	773.377	282.943	0.365854		Sec61b	216.829	514.889	2.37463
Fkbp15	78.3216	29.6039	0.377979		Snrpd2	64.6552	145.319	2.24759				40
Glul	262.438	596.79	2.27402		Rpl5	180.957	458.008	2.53103
Smox	171.405	31.926	0.186261		Triap1	243.108	115.557	0.475333
Nudt4	93.3096	27.2534	0.292075		Spp1	53.8835	208.334	3.86637
Rasgrp2	61.6833	10.3172	0.167261		Cd82	416.953	175.609	0.421172
Cxcl1	45.6576	10.9001	0.238736		Fmnl1	135.849	62.9285	0.463225
Igf1r	65.693	16.1407	0.245699		Rpl10a	64.3173	162.66	2.52903
Ggct	71.497	19.3018	0.269967		Myeov2	289.405	604.954	2.09034
Junb	1261.14	435.06	0.344975		Furin	1077.79	470.467	0.436512
Slc25a37	101.465	29.4454	0.290202		Rpl30	1045	2915.26	2.78972
Kctd12	127.66	39.14	0.306596		Ndufv3	129.921	268.712	2.06828
Cd2	45.9541	123.268	2.68242		Plekho2	561.736	151.288	0.269323
Spaca6	23.7498	67.5688	2.84503		Rpl35a	255.669	623.444	2.43848
Hsph1	68.2604	20.5047	0.300389		Minos1	174.699	351.509	2.01209
Ccnd2	2966.55	5781.31	1.94883		Prrc2a	103.276	39.1362	0.378948
mt-Nd1	434.368	809.643	1.86396		Srebf2	231.108	109.807	0.475131
Tes	172.467	67.5247	0.391521		Rhoa	4520.69	1591.27	0.351998
Hba-a1	1814.53	188.892	0.1041		Gm11598	32.4413	103.876	3.20197
RP23-59N15.4	108.13	21.5101	0.198928		Kif1c	141.161	77.275	0.547424
Bcl10	125.533	50.0409	0.398627		Snap29	95.3197	211.871	2.22274
Ube2j2	16.4311	51.9584	3.1622		Fabp5	95.0532	272.151	2.86314
Dazap1	52.4261	116.566	2.22344		Jag1	117.469	38.3177	0.326194
Zeb2	711.895	378.38	0.531512		Arl6ip5	427.56	165.727	0.387611
Bub1b	20.5781	63.3844	3.08019		Hist1h1c	117.433	327.603	2.7897
mt-Ta	325.639	124.638	0.382748		Ptk2b	230.796	109.852	0.475971
C3	261.232	101.747	0.38949		Ing1	110.653	44.4495	0.401702
Samhd1	291.503	112.567	0.386162		Scand1	104.614	58.7355	0.561451
I830012O16Rik	26.5935	3.19922	0.120301		Hivep3	716.571	240.246	0.335271
mt-Tq	516.472	171.315	0.331702		Rps15	279.725	566.33	2.0246
Snx20	116.855	50.9399	0.435923		Prmt1	219.658	91.0588	0.414547
Slco2b1	15.6849	54.7129	3.48824		Polr2f	116.294	245.512	2.11112
Ddx54	29.4683	80.3252	2.72582		Memo1	38.8188	123.337	3.17725
Trib1	541.049	194.407	0.359315		Lypla2	421.818	227.636	0.539655
Gmfg	31.9601	6.50102	0.20341		Dync1i2	306.826	161.435	0.526144
Smc6	82.2883	172.774	2.09961		Mfsd5	276.681	147.381	0.532676
Atp5g3	270.558	619.443	2.2895		Ola1	79.0653	162.665	2.05735
Psmb8	105.294	46.2513	0.439258		Ndufs5	29.1978	104.016	3.56247
Cfb	668.691	307.009	0.459118		Rps23	265.25	561.861	2.11823
Net1	20.3515	56.7311	2.78756		Iqsec1	355.526	180.716	0.508307
Clec4d	129.329	39.1151	0.302447		Rps3a1	169.881	390.286	2.2974
Irg1	650.094	91.4471	0.140667		Rps27l	117.737	257.883	2.19033
Ifi204	56.6987	14.8712	0.262284		Ap2b1	129.901	60.0345	0.462156
Zfp36l1	175.236	58.8353	0.335749		Ube2h	133.749	70.0012	0.52338
Ereg	21.0763	3.87204	0.183715		Mir142hg	123.093	46.5862	0.378462
Mbp	20.0969	58.7881	2.92524		Phf1	103.917	41.2022	0.396493
Cmtm7	71.6845	23.4356	0.326927		Fxr2	183.826	98.7947	0.537436
Pigr	19.0261	97.4125	5.11994		Dst	189.833	86.9935	0.458263
Tmem205	15.6767	2.47127	0.15764		Got2	179.951	95.8208	0.532481
Htatip2	3.6611	18.2036	4.97218		Sec61g	70.1815	180.695	2.57468
Pilrb2	45.3439	10.1086	0.222932		Tmem11	159.334	87.5312	0.549357
Cdh1	89.7833	180.915	2.01502		Snw1	248.592	134.339	0.540402
Ice1	10.7162	34.2764	3.19856		Aup1	138.341	62.504	0.451812
Tnfaip2	1878.41	1029.01	0.547807		Rae1	113.97	61.1337	0.536404
Kctd20	47.9502	11.8764	0.247682		B4galt1	1088.14	555.501	0.510504
Ccl3	116.097	31.4767	0.271123		Rnf19b	153.302	54.2625	0.353958
Myo1e	19.9013	52.3217	2.62906		Stt3a	65.3307	127.197	1.94697
Rest	318.334	158.552	0.498067		Lfng	103.269	56.1333	0.543563
Sart1	21.9142	54.679	2.49514		Rhoc	721.574	376.248	0.521426
Man2a2	77.3243	31.2214	0.403772		Bst1	323.638	678.261	2.09574
Zdhhc18	47.032	13.6254	0.289705		Fcgr2b	113.174	266.75	2.35698
Gys1	68.4791	25.7107	0.375453		Dnajc7	127.838	64.0648	0.501138
9330104G04Rik	53.9892	11.8197	0.218928		Rps27a	191.297	386.512	2.02047
Ccrl2	86.6808	26.6422	0.30736		Pet100	51.307	120.457	2.34776
Il1rn	1203.24	578.199	0.480534		Ier5	511.766	249.01	0.486571
Cd33	182.46	84.683	0.464118		Gla	107.768	55.996	0.519595
Whsc1l1	185.547	86.5816	0.466629		Ifngr1	255.683	133.861	0.523541
Zfp84	11.8546	39.9452	3.3696		Psma3	96.852	193.922	2.00225
Ell2	77.1143	27.3304	0.354415		Slc25a4	142.74	271.707	1.90351
Snhg9	27.9125	81.2968	2.91256		Herpud1	233.39	125.918	0.539518
Hp	504.886	76.4209	0.151363		Rad23b	319.749	185.168	0.579106
Dgat1	193.256	55.567	0.287531		Ptpn12	537.44	286.201	0.532526
Neurl1b	200.432	400.998	2.00067		Chmp5	51.1545	104.359	2.04007
Fosl2	284.674	137.896	0.484401		Fam129b	787.552	396.339	0.503254
Mt2	337.038	760.664	2.25691		Lpcat3	549.702	235.446	0.428316
Tacc2	11.2872	40.7693	3.612		Sh3pxd2b	765.518	389.529	0.508845
Etv1	46.3051	9.07106	0.195898		U2af2	450.808	216.669	0.480624
F10	267.253	153.492	0.574332		Ddx39b	254.322	139.141	0.547105
1200014J11Rik	23.3181	56.2716	2.41321		Dhx9	225.607	505.343	2.23992
Gyg	60.8049	21.1964	0.348597		Ociad1	350.175	204.309	0.583447
Arfgap1	14.4779	41.4984	2.86632		Dgkz	299.134	142.942	0.477854
Igsf6	127.823	63.141	0.493972		Mrpl20	63.035	131.795	2.09082
Mndal	53.385	14.8901	0.27892		Tpt1	374.363	934.817	2.49709
Rsu1	11.575	37.1853	3.21256		Dbi	789.422	1587.67	2.01118
Rreb1	15.7559	49.0559	3.1135		Arf5	439.08	223.064	0.508026
Mob3a	99.0931	37.2154	0.37556		Zswim8	164.916	88.577	0.537103
Wfdc21	1142.23	581.033	0.508683		Rpl6	389.689	740.436	1.90007
Gdf15	181.357	95.456	0.526342		Apbb1ip	434.474	252.916	0.58212
Litaf	118.889	48.0114	0.403833		Ndufa1	504.263	1091.78	2.1651
Ier5	411.764	204.017	0.49547		Rcl1	373.924	133.189	0.356193
Ncor2	66.8229	144.529	2.16287		Mrps18c	60.8407	175.542	2.88527
Tap1	215.976	30.6554	0.141939		Rps10	947.332	539.925	0.569942
Arl4c	77.8038	26.4871	0.340434		Mrps21	47.3825	108.632	2.29267
Entpd1	82.6821	22.6058	0.273406		Slc25a5	175.149	420.068	2.39835
Dusp16	123.749	45.1518	0.364867		Kdm6b	109.821	26.8818	0.244779
Stk10	21.4019	65.2675	3.04961		Bcl3	160.751	55.981	0.348246
RP23-122P5.3	82.4644	27.8598	0.337841		Rpl41	100.925	196.546	1.94743
Kctd11	101.056	42.9075	0.424592		Hsd17b12	624.653	342.292	0.547972
Nab1	57.4547	25.125	0.437301		Grina	436.921	211.041	0.48302
Nod1	97.5326	42.5109	0.435864		Aim2	152.633	72.419	0.474466
Birc3	56.0019	17.3835	0.310409		Lims1	57.2752	119.481	2.08608
Gltscr1l	8.27069	30.0123	3.62875		F7	499.978	958.009	1.9161
Ngrn	3.26726	17.4688	5.34662		Psmd4	365.16	185.215	0.507216
Triobp	59.4664	24.5937	0.413572		Ndufa13	301.806	531.274	1.76032
Rpl19	26.2928	6.23008	0.23695		Peli1	180.646	88.8985	0.492114
Skil	146.147	63.9949	0.43788		Polr2m	99.7548	223.798	2.24348
Ndufb8	71.0667	138.616	1.95051		Aldh2	317.683	152.79	0.480952
Fcgr3	505.178	247.352	0.489632		Evl	62.7832	146.971	2.34093
Cdk14	24.0218	59.1823	2.46369		Txn-ps1	59.451	156.084	2.62543
Kpna4	145.156	71.3858	0.491786		Csnk2b	171.882	98.7687	0.574631
Isg15	288.696	108.287	0.375089		Sec13	50.5403	100.339	1.98533
Rheb	8.79013	31.9612	3.63603		Eif2s2	351.207	188.637	0.537111
Lmo7	39.5656	92.1795	2.32979		Psma4	64.3595	154.238	2.3965
Brd9	63.1607	123.213	1.95079		Socs2	156.269	67.9838	0.435042
Angel2	10.6258	36.308	3.41695		Ubc	2580.15	961.772	0.372758
Rab11fip1	120.112	52.6905	0.438677		Mark2	191.698	87.5215	0.45656
Trem1	423.031	156.772	0.370592		Pabpc1	609.632	325.983	0.53472
Hspd1	124.354	59.8708	0.481455		Drap1	152.944	91.0945	0.595608
Dhrs3	16.9266	54.5494	3.2227		Spen	110.799	63.0722	0.569249
Dus1l	4.59772	20.7378	4.51046		Npc1	181.32	110.696	0.610501
Csf1r	270.163	139.902	0.517844		Atp6v1a	269.823	478.839	1.77464
Tmem183a	60.8151	26.1052	0.429256		Glrx3	58.791	114.01	1.93923
Lck	43.9584	9.48923	0.215869		Rela	378.976	217.955	0.575117
Krt79	445.729	761.583	1.70862		Pip5k1a	136.461	67.6252	0.495564
Fgd3	46.7357	12.7184	0.272135		Polr2k	30.0292	102.944	3.42812
Jak2	116.613	50.6729	0.434538		Amdhd2	88.5478	163.467	1.84609
Hivep3	171.179	314.98	1.84007		Rps16	614.465	1117.22	1.8182
Samsn1	212.576	93.6111	0.440365		Dnaja2	182.186	114.917	0.630767
Ndufv1	34.8886	100.733	2.88728		Rps4x	144.769	280.36	1.93661
Gpbp1	88.5984	42.714	0.482108		Cap1	119.087	63.5755	0.533858
Tax1bp1	295.826	154.962	0.523827		Snrpd3	408.846	196.352	0.480259
2410002F23Rik	29.6605	75.0457	2.53016		Spcs3	79.6275	225.976	2.83791
S100a8	7336.92	835.232	0.11384		Prpf8	162.081	97.261	0.600077
Klf3	167.439	85.7456	0.5121		Arpc3	1010.06	554.845	0.549321
Midn	94.5058	47.0665	0.498028		Gnai2	1088.6	626.074	0.575116
Clec4e	211.382	100.114	0.473618		Jdp2	104.32	36.616	0.350996
Tbce	7.39852	27.6121	3.73211		2510039O18Rik	122.774	69.8465	0.568902
Atp1a1	192.768	334.918	1.73742		Rpl38-ps2	135.515	241.07	1.77892
Ncf4	38.2785	13.8549	0.361951		Eef1b2	605.011	1143.15	1.88948
Dnajb1	56.315	20.487	0.363793		Marveld1	163.276	94.7392	0.580242
Scamp1	19.4553	48.1239	2.47356		Arhgef2	185.129	105.664	0.570758
Rnf25	5.90913	23.0373	3.89859		Stx16	69.8425	124.049	1.77613
Gga1	90.5625	45.8936	0.506762		Clic1	781.86	379.704	0.485643
Etnk2	22.0889	6.17378	0.279497		Ino80b	25.9968	11.598	0.446133
Bhlhe41	60.7454	115.277	1.89771		Ndufa4	73.979	171.818	2.32252
Vav2	20.1978	55.7913	2.76225		Ftl1	1154.93	2646.44	2.29143
Mxd1	640.257	121.881	0.190362		Lrp1	714.821	431.562	0.603735
Tmed9	204.911	427.626	2.08689		Rpl18a	128.754	246.384	1.91361
Txnl1	17.4416	45.8797	2.63047		Atf4	352.309	185.392	0.52622
Pygo2	83.8071	149.494	1.78379		Tap2	276.924	108.946	0.393415
Hba-a2	649.794	85.7135	0.131909		Tmem258	261.979	544.317	2.07771
Cpne2	60.3438	13.8413	0.229374		R3hdm4	123.149	58.9228	0.478466
Mtmr2	20.4396	4.85376	0.237469		Ssh2	111.817	59.7835	0.534657
Prdx5	252.17	137.683	0.545992		Tmem63a	116.582	69.23	0.593828
Dip2a	20.6924	5.43928	0.262864		Aldoc	44.58	102.621	2.30195
Cdc42bpb	36.6343	89.6346	2.44674		Hnrnpa2b1	244.947	560.658	2.2889
Chd7	279.712	115.41	0.412605		Tcf25	428.569	266.529	0.621905
Clec5a	125.595	54.521	0.434101		Cd74	704.118	322.809	0.45846
S100a9	4684.37	471.43	0.100639		Stk40	138.89	78.0993	0.562309
Pacs2	17.284	43.1068	2.49403		Fnip1	117.463	61.3012	0.521875
Hexim1	43.9494	14.3819	0.327238		Tmem50a	833.604	472.398	0.566694
2210013O21Rik	3.66773	16.0315	4.37095		Pycard	63.9557	126.043	1.97079
Mecom	76.5382	225.609	2.94767		Gripap1	118.075	67.948	0.575466
Slc7a11	348.761	149.716	0.42928		Chd8	121.497	71.971	0.592367
Casp4	105.679	45.5949	0.431449		Rpl38	558.69	965.777	1.72865
Ccr1	88.961	38.6205	0.434128		Nf2	103.492	60.2463	0.582136
Socs2	54.3515	101.491	1.86732		Hspd1	58.3312	112.386	1.92668
Hcls1	211.545	123.537	0.583975		Psap	3428.4	7479.63	2.18167
Pogz	5.53508	19.4597	3.51571		Rpl37a	3372.59	6925.63	2.0535
mt-Tm	203.702	103.242	0.506826		Btk	228.634	111.212	0.48642
Wdr45b	29.2968	65.9009	2.24942		Fus	2409.7	1166.51	0.48409
Vimp	57.4948	121.673	2.11624		Plekhg1	212.034	128.144	0.604354
1110008F13Rik	87.6717	38.7656	0.442167		Atp5f1	101.053	189.853	1.87875
Tnfaip8	152.367	76.5127	0.50216		Spcs1	138.32	238.653	1.72536
Dopey2	31.5075	10.6776	0.338891		Ehd1	820.473	370.421	0.451473
Sh3bp2	60.7658	127.904	2.10487		Atp5a1	591.273	1071.87	1.81282
Slc9a3r1	42.2711	15.5192	0.367136		Sin3b	496.865	255.577	0.51438
Zfp687	9.70334	30.6569	3.15942		Magoh	233.853	152.139	0.650575
Gtpbp8	27.8761	6.90025	0.247533		Ccdc47	90.2608	203.339	2.2528
Nip7	5.23788	19.148	3.65567		Anxa1	190.023	436.132	2.29516
Ube2h	58.1713	24.8849	0.427786		Rab11b	147.279	86.4732	0.587141
Adora2a	81.7444	29.7312	0.36371		Cisd2	63.23	110.701	1.75076
Sec31a	23.6053	55.6106	2.35585		Tmed3	81.4333	156.59	1.92293
Klf9	39.3482	88.6141	2.25205		Tmem167	99.5303	193.931	1.94847
Nvl	4.35908	15.2676	3.50248		Snrpe	192.053	347.096	1.80729
Vps8	18.5798	4.20594	0.226372		43532	117.238	215.399	1.83728
Ago3	14.0993	36.6069	2.59635		Rps12	227.614	454.664	1.99752
Zfp710	58.2004	28.9667	0.497706		43710	92.116	166.772	1.81045
Tle3	114.812	62.0074	0.540076		Arpp19	333.107	581.604	1.74599
Fpr1	252.937	135.606	0.536127		Add3	58.5523	103.965	1.77559
Ier3	1641.09	348.88	0.21259		Gde1	180.897	111.672	0.617325
Dirc2	32.4142	11.8808	0.36653		Slc48a1	465.265	261.782	0.562652
mt-Nd2	3277.18	5577.55	1.70193		Dynlrb1	115.32	215.37	1.86759
Ogt	20.5096	61.1382	2.98095		Ppp1r18	320.365	199.567	0.622936
Adprh	73.0595	32.8333	0.449405		Sec24c	55.873	102.364	1.83209
Arid3a	60.6063	26.8395	0.44285		Sema4a	247.442	145.585	0.588361
Plet1	430.092	794.126	1.84641		2410015M20Rik	118.862	206.186	1.73466
Rel	136.674	59.3532	0.43427		Golga2	133.571	82.704	0.619176
Rnf213	56.6533	19.6182	0.346285		Rps25	2874.72	1639.69	0.570382
Cflar	463.397	271.435	0.585751		Psme1	261.264	175.89	0.673226
N4bp1	246.829	144.427	0.585129		Setd8	265.31	152.108	0.573321
Rbpj	111.039	60.21	0.542243		Abracl	233.467	440.526	1.88689
Mroh2a	190.49	64.6535	0.339407		Psme2b	74.1243	132.323	1.78515
Ppp3ca	130.113	75.5647	0.580763		Gm5963	375.963	248.771	0.661691
Hif1a	149.56	58.2097	0.389205		Cisd1	64.5105	119.737	1.85608
Lilrb4	227.648	137.688	0.60483		Ak2	217.644	125.704	0.577567
Nol11	14.4062	38.6444	2.68247		Baz2b	147.218	90.7823	0.616651
Wdr77	5.4644	20.4089	3.73488		Chmp4b	1382.33	813.325	0.588374
B230354K17Rik	31.0573	11.3958	0.366929		Nmt1	215.114	133.972	0.622795
Tef	33.2049	74.496	2.24352		Eif3j2	105.212	52.4195	0.498229
Dctn5	37.8585	12.1703	0.321468		Riok3	225.939	138.847	0.614533
Mocs2	12.7235	36.2833	2.85167		Tspo	181.632	359.074	1.97693
Phf12	12.9164	37.5729	2.90892		Rtfdc1	145.632	88.8345	0.609993
G0s2	42.8143	12.7902	0.298736		Etfa	56.6803	128.624	2.26929
Gng12	37.466	9.23705	0.246545		Urm1	132.791	78.3023	0.589664
Actr3	119.491	61.5697	0.515265		Tle3	127.748	77.156	0.603973
Fyn	10.5513	31.3964	2.97559		Fam120a	251.026	163.881	0.652845
Dhx38	110.68	45.4899	0.411004		Acap2	97.0793	179.881	1.85293
Nhlrc3	9.8097	26.9042	2.74261		1810022K09Rik	128.132	249.155	1.94452
Gm26740	32.4093	11.0125	0.339793		Myd88	223.756	132.45	0.591939
Smim13	25.5044	8.99481	0.352676		Ndufs4	80.3852	137.143	1.70607
Slc6a6	197.119	304.295	1.54372		Trappc1	94.1692	171.242	1.81844
G6pdx	38.3209	14.7514	0.384945		Anxa2	6479.17	3516.63	0.542759
Fbxo33	17.3235	3.50408	0.202273		Mcoln3	63.9635	144.147	2.25358
Tbkbp1	53.7967	24.2688	0.451121		Notch2	137.744	274.039	1.98949
Pnrc1	36.4168	14.7842	0.405973		Tceb1	89.1243	212.673	2.38625
RP24-188H2.3	33.5444	9.01822	0.268844		Btf3	37.2215	100.874	2.71011
Gabarap	958.282	649.039	0.677295		Fabp4	414.801	824.474	1.98764
					Actn1	709.667	458.515	0.6461
					Btbd9	111.709	58.6937	0.525416
					Idh3g	124.589	71.8713	0.576866
					Ski	243.807	155.381	0.637312
					Uqcrq	236.194	386.341	1.63569
					Flna	1279.74	792.734	0.619448
					Rin3	138.066	74.8417	0.542072
					Spryd3	166.856	103.035	0.617505
					Cox8a	404.616	723.757	1.78875
					Ndufb2	62.88	137.723	2.19025
					Hr	140.192	55.107	0.393083
					Rnf10	387.003	208.84	0.539636
					Eny2	54.8798	108.391	1.97506
					Cebpa	949.655	424.294	0.446787
					Ndufab1	58.7945	108.346	1.84279
					Prpf19	101.828	167.939	1.64925
					Rnf6	124.893	68.9898	0.552392
					Bola2	300.871	481.058	1.59888
					Eml2	169.45	82.8272	0.488802
					Ddx24	250.138	143.72	0.574563
					Sec63	165.969	108.218	0.652041
					Ctsa	1471.02	910.432	0.618912
					Ctsl	241.813	466.905	1.93085
					Gnl1	111.117	71.3547	0.64216
					Selt	71.204	137.615	1.93269
					Huwe1	135.13	83.9672	0.62138
					Uqcrb	125.265	226.155	1.80541
					Cflar	285.801	139.805	0.489169
					Ear2	403.867	804.343	1.9916
					Srsf5	206.234	112.364	0.544835
					Gm6265	66.0482	125.685	1.90293
					Mdh2	334.986	214.394	0.640008
					Gak	170.421	111.085	0.651827
					Commd3	77.3135	128.626	1.66369
					Jagn1	134.629	77.5135	0.575757
					Taok3	167.863	98.0418	0.584059
					Nxf1	60.6423	115.251	1.9005
					Eif4h	189.764	325.144	1.71341
					Tagln2	3779.93	2201.14	0.582324
					Atrnl1	51.7375	121.013	2.33898
					Irf5	168.796	97.985	0.580493
					Lcp2	174.666	96.9032	0.554793
					Fam21	113.781	76.5853	0.673096
					Msn	886.571	562.048	0.633957
					Acin1	119.561	72.077	0.602847
					Rpl22	534.312	906.746	1.69703
					Mpdu1	308.412	189.464	0.614319
					S100a10	397.689	697.102	1.75288
					Pdia6	224.986	350.409	1.55747
					Srp14	218.988	354.221	1.61753
					Rps27	565.995	967.519	1.70941
					Wfdc21	1265.55	2692.78	2.12775
					Fam105a	81.559	168.736	2.06888
					Becn1	153.301	102.215	0.666757
					Stom	112.219	69.7493	0.621547
					Ctsc	535.654	968.795	1.80862
					Slc38a1	153.01	102.446	0.669536
					Ppp3r1	430.996	267.091	0.619706
					Uba1	253.979	168.995	0.665388
					Psmd13	285.211	181.33	0.635776
					Ptms	460.407	296.436	0.643856
					Nfkbib	180.343	92.9385	0.515343
					Cnih4	82.2283	139.442	1.6958
					Dohh	115.069	66.4813	0.577754
					Mkks	62.6295	120.008	1.91616
					Spag9	119.763	73.4103	0.612964
					Srxn1	177.375	106.215	0.598819
					Ufc1	80.0748	136.889	1.70952
					Dync1h1	221.868	143.586	0.647166
					Snord89	114.767	25.3795	0.221139
					Ndufc1	120.496	213.334	1.77046
					AI662270	115.167	68.2127	0.592296
					Rab11fip1	105.823	57.5953	0.544262
					Iqgap1	2463.99	1576.62	0.639864
					Atp6v0d2	641.176	1117.01	1.74213
					Atp13a2	91.7722	150.911	1.64441
					Stk38	210.867	123.378	0.585097
					Erp29	149.801	232.663	1.55314
					Eif3i	165.833	249.759	1.50609
					Zbtb22	108.102	65.9015	0.609623
					Prkaca	209.76	126.249	0.601875
					Cln5	257.807	166.848	0.647182
					Ets2	209.028	70.0675	0.335206
					Azin1	74.8785	120.858	1.61405
					Atp5g2	54.2165	118.185	2.17987
					Uhmk1	94.761	158.456	1.67216
					Smarcc2	225.85	113.619	0.503073
					Ly75	360.636	227.89	0.631911
					Fbxl14	87.4762	198.706	2.27154
					Pttg1	101.198	66.7843	0.659936
					2310047M10Rik	173.279	106.906	0.61696
					Ppm1a	165.066	107.281	0.649929
					Vat1	491.273	318.76	0.648844
					Unc119	322.051	212.856	0.66094
					Vasp	1444.57	852.315	0.590013
					Rps2	158.564	278.992	1.75949
					Wasf2	127.307	83.9363	0.659322
					Bax	104.455	61.714	0.590818
					Flot2	170.77	109.984	0.644046
					Rpl39	1114.54	2013.32	1.80642
					Setd5	205.912	125.631	0.610121
					Pla2g16	75.2177	140.384	1.86637
					Kctd10	109.125	70.8383	0.649148
					Spn	50.7165	102.928	2.02947
					Gng5	104.076	197.759	1.90014
					Cd274	177.192	83.7225	0.472496
					Rcc2	129.407	79.3332	0.613052
					Pdia3	908.644	469.692	0.516916
					Slc7a5	238.205	129.714	0.544548
					Ctsk	769.175	1601.02	2.08147
					Acaa1b	424.653	201.548	0.474619
					Pltp	105.527	54.6453	0.517833
					Hmgcs1	121.603	195.24	1.60555
					Ndufv2	84.6925	141.938	1.67592
					Slc38a10	219.766	148.936	0.677705
					2310011J03Rik	124.128	79.869	0.643438
					Plec	591.832	361.81	0.611339
					Glyr1	228.673	421.75	1.84434
					Sirt2	359.034	254.216	0.708056
					Krtcap2	232.146	364.04	1.56815
					Axl	804.608	535.335	0.665337
					Capn1	232.826	125.019	0.536966
					D8Ertd738e	93.9743	152.251	1.62014
					Rsl1d1	217.382	143.765	0.661347
					Anapc5	164.992	108.383	0.656901
					Cltc	442.226	302.2	0.683362
					Ppp1r9b	163.647	109.772	0.670788
					Hsdl1	104.534	173.172	1.65661
					Skil	156.51	95.0877	0.60755
					Rassf5	123.028	80.279	0.652528
					Lmnb1	356.356	120.545	0.338272
					Exosc5	114.504	77.658	0.678209
					Npepps	113.257	75.5408	0.666985
					Eif3h	364.396	231.617	0.635618
					Lcp1	1418.62	933.536	0.658061
					Atp6v1g1	170.647	283.683	1.6624
					Adrbk1	294.092	211.121	0.717874
					Actl6a	129.446	88.7215	0.685397
					Kpnb1	103.044	178.52	1.73246
					Pcnxl3	139.145	58.6095	0.42121
					4930506M07Rik	321.407	202.121	0.628865
					Rpl27	871.094	1414.93	1.62432
					Apoa1bp	110.605	74.317	0.671915
					Cd300lf	1235.45	603.716	0.488659
					Klf13	465.657	314.341	0.675048
					Ncln	291.674	188.199	0.645238
					Zbtb7a	550.256	373.031	0.677922
					Sdhc	143.051	229.918	1.60725
					Cox5b	146.29	224.687	1.5359
					Gm22710	536.368	220.795	0.411649
					Diap2	254.609	160.404	0.63
					Cpt1a	177.609	289.534	1.63018
					Tcp1	99.2215	162.766	1.64044
					Pip4k2c	129.26	86.2095	0.666949
					Psma1	103.848	169.532	1.6325
					Rabl6	105.553	64.2618	0.608813
					Crip1	190.854	444.356	2.32825
					Hebp1	190.632	332.228	1.74278
					Slc12a7	121.543	80.6855	0.663842
					Rab8a	353.186	234.053	0.662688
					1810037I17Rik	299.657	600.125	2.00271
					Pik3cd	166.571	99.7103	0.598606
					Gatad2a	124.996	87.409	0.699292
					Pea15a	116.842	77.6538	0.664605
					Syk	554.614	353.507	0.637392
					Stk24	388.366	258.469	0.665528
					Jak2	112.384	59.7275	0.531459
					Ifrd1	965.206	497.192	0.515115
					Cox14	103.073	154.276	1.49676
					Shfm1	740.105	1281.83	1.73196
					Mapkapk3	197.731	128.539	0.650072
					Rpl14	490.28	320.676	0.654067
					Tnfrsf21	231.653	140.975	0.608562
					Uxs1	182.64	116.469	0.637693
					D17Wsu92e	378.502	268.544	0.709492
					Cox7b	283.428	455.24	1.60619
					Ctbp1	221.145	156.06	0.705692
					Cd200r4	70.3155	112.036	1.59333
					Map2k3	268.438	183.068	0.681974
					Ctss	4608.74	8404.72	1.82365
					Vps72	129.037	67.3398	0.521864
					Zfp36	202.57	90.0775	0.444673
					Mgat4b	288.297	201.211	0.697929
					Atf6b	167.546	112.672	0.672485
					Rbms1	548.707	390.71	0.712056
					Dynll1	59.6213	101.496	1.70234
					Rnf7	61.403	108.941	1.7742
					Fn1	566.618	995.266	1.7565
					Rpn2	176.906	271.561	1.53506
					Coro1a	325.871	191.813	0.588618
					Ube2z	162.04	248.038	1.53072
					Yeats4	179.723	126.788	0.705464
					Rbx1	70.8153	112.973	1.59532
					Kmt2e	162.641	116.695	0.717503
					Junb	496.691	230.738	0.464551
					Eif3e	85.811	153.084	1.78396
					Ube2d3	332.213	223.772	0.67358
					Capns1	408.204	293.616	0.719287
					Gcnt2	130.196	210.704	1.61837
					Rpl36	231.287	383.03	1.65608
					Sap30l	102.659	65.4073	0.63713
					Bak1	121.817	85.156	0.69905
					Txn1	1808.15	3087.14	1.70735
					Rnf220	126.828	86.638	0.683115
					Snx5	524.27	339.227	0.647046
					Plaur	152.549	83.5445	0.547657
					Pim3	127.514	73.3893	0.575537
					Prcp	158.71	105.336	0.6637
					Abhd12	1078.97	699.012	0.647852
					Csnk1g2	246.611	172.925	0.701204
					Dnajb11	66.724	116.882	1.75172
					Aff1	105.231	69.0182	0.655877
					Rmnd5a	64.9022	121.716	1.87537
					Ppp3ca	199.295	305.564	1.53323
					Csde1	469.418	332.087	0.707443
					Mpeg1	866.298	1404.45	1.62121
					Gsk3b	154.324	101.886	0.660211
					2510009E07Rik	57.2137	101.169	1.76827
					Rps28	1404.56	2203.22	1.56862
					Ndufa3	226.322	333.253	1.47247
					Jup	215.304	109.32	0.507747
					Slirp	124.899	187.145	1.49837
					Supt6	108.789	71.3102	0.655493
					Ccdc115	218.702	153.524	0.701979
					Fam168b	118.734	177.588	1.49568
					Ccnl1	110.031	67.4378	0.612895
					Gabarap	2105.88	1420.45	0.674515
					Tubb4b	59.2332	100.536	1.69729
					Uqcrfs1	287.255	453.607	1.57911
					Snd1	118.877	82.227	0.691695
					Znfx1	65.1755	101.906	1.56357
					Rps18	356.965	526.714	1.47553
					Cmip	216.38	152.969	0.706947
					Pik3r1	111.552	71.0685	0.637087
					Ndufb5	133.229	205.394	1.54165
					Pafah1b1	221.397	326.743	1.47582
					Tonsl	439.23	305.096	0.694615
					Phb2	325.647	234.051	0.718726
					Brd4	148.79	96.6128	0.649322
					Tapbp	526.427	352.986	0.670532
					Atf5	183.983	105.558	0.573736
					Rsrp1	105.888	196.281	1.85366
					Mapkapk2	854.339	520.654	0.609423
					Pigt	271.427	156.043	0.574901
					Id2	266.579	174.087	0.65304
					Scap	182.36	119.66	0.656175
					Cic	115.311	80.1245	0.694857
					Isg15	288.971	119.329	0.412943
					Cpne5	111.409	65.181	0.585059
					Stk17b	86.7027	141.221	1.6288
					Hpcal1	450.718	277.776	0.616297
					Pbxip1	240.963	162.841	0.675793
					Actn4	250.431	177.768	0.709849
					Cct2	134.402	200.622	1.49269
					Tnfaip2	1528.72	938.758	0.614083
					Ccnd2	1860.31	1013.14	0.54461
					Fam96a	91.893	144.222	1.56946
					Copb2	102.937	71.7043	0.696584
					9130401M01Rik	83.8695	133.103	1.58703
					Rab1	242.9	377.594	1.55453
					Arhgef7	109.993	66.665	0.606087
					Hsp90ab1	1697.95	1021.62	0.601675
					Pex11a	325.763	203.045	0.62329
					Mbnl2	109.286	68.5233	0.62701
					Ap3d1	137.018	206.358	1.50606
					Magt1	85.654	133.549	1.55917
					Fam129a	246.712	151.936	0.615843
					BC031181	99.8815	143.81	1.4398
					Chmp1a	230.286	158.83	0.689705
					Tnip1	275.8	136.693	0.495622
					Tmx1	171.856	243.902	1.41922
					Nr4a1	215.039	70.3642	0.327217
					Cops5	149.804	104.669	0.698703
					AI413582	122.187	82.7495	0.677238
					Mxd1	233.518	66.6553	0.28544
					Tgfbr2	137.444	231.34	1.68317
					Fbxl5	113.835	179.393	1.5759
					Pqlc3	61.761	115.654	1.87261
					Rpl23	980.488	1635.19	1.66773
					Klc1	225.983	144.212	0.638155
					H2-K1	1569.84	1005.34	0.640411
					Psmc1	237.986	156.585	0.657959
					Bsg	268.429	199.52	0.743288
					Rbm17	81.4315	147.119	1.80666
					Ms4a6d	211.407	326.26	1.54328
					Eif5b	269.144	198.039	0.735811
					Tpp2	67.9047	115.733	1.70434
					Hdgf	344.645	239.028	0.693548
					Nucb1	74.154	112.079	1.51144
					Itgax	977.618	631.208	0.64566
					Rpl31	962.326	1536.57	1.59672
					Pfkfb4	172.41	126.002	0.730827
					Actr1b	119.198	81.594	0.684523
					Arl8b	110.824	166.068	1.49849
					Tsc22d4	103.231	69.3533	0.671829
					Naaa	290.851	479.946	1.65014
					Rpl36a	1234.06	2047.15	1.65887
					Fkbp2	144.917	227.007	1.56646
					Zfp703	199.577	118.369	0.593099
					Saraf	326.706	236.792	0.724785
					Vapb	346.01	242.571	0.701051
					Ddb1	568.413	409.919	0.721165
					Mmp8	69.414	141.066	2.03223
					Ndufb3	227.744	380.267	1.66971
					Ear1	1200.25	701.42	0.584393
					Ndufb9	137.862	205.227	1.48864
					Nop58	98.7318	153.018	1.54983
					Elovl1	158.145	110.727	0.700161
					Trib1	192.613	93.1015	0.483361
					Tkt	659.673	427.929	0.648699
					Tnf	100.154	44.8855	0.448166
					Skiv2l	67.175	109.61	1.63171
					Slc7a1	105.091	63.6963	0.606106
					Tardbp	69.624	116.187	1.66878
					Smarcd2	120.585	82.9507	0.687903
					Hyou1	110.123	61.653	0.559855
					Hmox1	144.613	92.33	0.638465
					Atp6v1f	1002.71	697.605	0.695717
					Rpl9	318.808	468.36	1.4691
					Psmb4	237.124	350.53	1.47825
					Rpl13a	690.875	1062.51	1.53792
					Sec22b	113.38	81.8347	0.721774
					Polr2g	68.1825	106.8	1.56638
					Sdf4	189.889	140.328	0.739001
					Rsu1	97.1637	147.202	1.51499
					Cox6b1	635.028	959.323	1.51068
					Pmepa1	195.152	124.531	0.638123
					Polr2a	183.985	135.718	0.737658
					Rnh1	1358.49	963.104	0.708952
					Ccnk	123.507	187.89	1.52128
					Qsox1	937.338	593.054	0.6327
					Nagpa	196.077	143.553	0.732123
					Irf8	136.845	94.2043	0.6884
					Hnrnpl	170	115.993	0.682309
					Grpel1	204.963	134.861	0.657976
					Card11	105.246	74.0393	0.703484
					Adam17	537.158	346.401	0.644876
					Lima1	766.382	482.322	0.62935
					Vcp	303.67	201.746	0.664358
					Srp9	75.3915	135.214	1.7935
					Hsd3b7	127.526	199.363	1.56332
					Ncor2	179.81	119.48	0.664477
					Rpl22l1	75.794	124.903	1.64793
					Mertk	372.732	245.469	0.658566
					C77080	69.336	117.477	1.69431
					Stk10	112.688	196.316	1.74212
					Purb	312.487	227.607	0.728372
					Mtdh	563.66	376.7	0.66831
					Calm2	177.257	264.63	1.49291
					Eif1ax	83.7302	124.85	1.4911
					Sqstm1	718.443	492.596	0.685644
					Swi5	278.007	182.842	0.657687
					Rpl37	1998.91	3192.47	1.59711
					Tpd52l2	73.4335	112.192	1.5278
					Fnta	129.529	185.767	1.43417
					Mapre1	334.756	243.106	0.726218
					Stat6	118.912	86.2168	0.725045
					Plek	1440.86	842.166	0.584487
					Isoc2a	389.956	266.521	0.683464
					Slc39a11	151.725	102.372	0.67472
					Chmp2a	200.119	305.707	1.52763
					Sae1	259.555	170.529	0.657005
					Atp6ap1	1032.82	739.854	0.716344
					Emd	195.461	137.938	0.705705
					Mfsd12	230.37	155.506	0.675025
					Pfkfb3	121.651	69.7347	0.573234
					Srp19	71.01	108.787	1.532
					Nabp1	165.946	270.986	1.63298
					Hck	593.209	377.3	0.636033
					Mpc2	124.069	206.648	1.6656
					Lhfpl2	74.8858	117.014	1.56257
					Rtcb	141.653	106.491	0.751777
					S100a11	526.694	355.828	0.675589
					Tm9sf4	166.801	99.8113	0.598383
					Irf1	175.645	96.873	0.551528
					Actb	13132.1	8168.34	0.622014
					Pim1	345.244	188.928	0.547232
					Atg3	77.5182	120.816	1.55854
					Cux1	102.123	69.7583	0.683084
					Atxn1	157.713	112.208	0.711471
					Rrs1	67.8377	124.041	1.8285
					P2ry14	408.208	276.199	0.676613
					Itpr2	208.002	146.86	0.706051
					Nfkb2	108.002	61.904	0.573177
					Cbfb	115.107	168.185	1.46112
					Bcl2a1d	171.973	348.869	2.02863
					Anp32a	156.504	98.0652	0.6266
					Naca	150.72	249.178	1.65325
					Rpl3	769.672	1135.6	1.47543
					Higd2a	136.042	103.348	0.759679
					Taok1	149.71	107.556	0.718425
					Crlf2	302.333	231.664	0.766253
					Atp6v1e1	520.16	383.972	0.73818
					Batf	108.378	70.3402	0.649027
					Tnfrsf1b	243.474	156.392	0.642336
					Rab5c	2786.89	1879.19	0.674296
					Mgst1	186.462	296.938	1.59248
					Hsbp1	108.52	163.421	1.5059
					Acaa1a	199.452	149.602	0.750062
					Lamtor1	288.989	187.481	0.648748
					43723	117.525	193.165	1.64361
					Sumo3	320.005	227.206	0.710007
					Gtf2h5	120.656	173.722	1.43981
					Tuba1c	561.35	387.354	0.690041
					Cotl1	4070.33	2796.34	0.687006
					Rps7	415.427	626.109	1.50715
					Snrpb2	160.268	117.006	0.730067
					Lrp10	173.302	123.77	0.714187
					St13	299.835	226.228	0.754506
					Sec11a	97.3817	141.365	1.45166
					Rps29	1772.04	1236.54	0.697808
					Pebp1	91.1192	132.844	1.45791
					Myl12b	259.955	185.209	0.712467
					Sidt2	125.326	94.0933	0.750785
					Ergic1	150.084	108.459	0.722651
					Rpl18	225.567	323.747	1.43526
					Tnfaip8	152.778	108.504	0.710206
					Ndufb10	100.837	155.438	1.54147
					Ifitm2	130.598	56.3528	0.431497
					Cox7c	225.274	319.103	1.41651
					Rplp0	704.875	1022.74	1.45095
					Rplp2	993.263	1451.28	1.46113
					Fam49b	316.121	220.394	0.697182
					Itpripl2	316.854	230.321	0.7269
					Psmb5	161.65	225.005	1.39193
					Gba	126.009	181.66	1.44164
					Gab2	262.672	178.617	0.68
					Gar1	73.5457	114.211	1.55292
					Esrra	81.7627	119.431	1.4607
					Ddost	176.872	133.481	0.754677
					Zfp770	14.7745	7.835	0.530306
					Usp14	139.339	105.662	0.758309
					Eif4b	104.297	149.428	1.43272
					Ndufa6	214.606	307.828	1.43439
					Hvcn1	246.763	361.71	1.46582
					Mbnl1	255.685	192.972	0.754727
					Ehbp1l1	152.985	115.097	0.752341
					H2-DMb1	695.379	481.517	0.692452
					Bhlhe40	134.375	90.1515	0.670895
					Actr10	145.373	112.326	0.772676
					Arl2bp	99.1532	169.349	1.70795
					Gas5	236.435	347.968	1.47173
					Pgrmc2	117.022	84.8245	0.724856
					Abhd16a	127.401	92.4903	0.725977
					Tyrobp	1656.32	2449.06	1.47861
					Chtf8	202.05	125.801	0.622623
					Cdc42ep3	98.8893	166.85	1.68724
					Mgat1	225.685	176.601	0.782509
					Ufd1l	104.358	80.2295	0.768793
					Ddx50	66.806	102.05	1.52756
					Atp6v0a1	133.051	92.0433	0.691789
					Mob1a	184.415	288.951	1.56685
					Mdm2	134.821	96.5247	0.715946
					Atp6ap2	649.543	490.394	0.754984
					Gpcpd1	184.247	299.127	1.62351
					Hsd17b4	91.7097	142.918	1.55837
					H2-Eb1	810.211	445.362	0.549686
					Col4a3bp	90.2825	127.375	1.41084
					Psmd6	78.2668	112.242	1.4341
					Stx6	137.982	105.757	0.76645
					Arhgap1	106.237	74.986	0.70584
					Sp1	137.627	102.475	0.744586
					Snrnp70	329.282	459.4	1.39515
					Ddx6	485.125	349.065	0.719535
					Ubb	284.471	210.377	0.739538
					Fam32a	119.474	80.4485	0.673356
					Coro1c	700.299	1025.91	1.46495
					Gp49a	177.939	111.163	0.62473
					Higd1a	97.3482	136.446	1.40163
					Sec61a1	650.218	477.41	0.734231
					Ppig	121.973	86.1172	0.706035
					Atp10a	141.138	99.1905	0.70279
					Ythdf3	101.323	75.049	0.740692
					Pdcd6	77.6308	115.704	1.49044
					Hdc	373.147	74.67	0.200109
					Acads	209.739	158.501	0.755705
					Rab31	124.199	93.5695	0.753385
					Jak1	264.956	203.226	0.76702
					Csf1r	370.984	253.803	0.684136
					Wipf1	97.869	132.978	1.35874
					Ndufc2	132.494	188.688	1.42413
					Smdt1	167.662	234.452	1.39836
					Edf1	182.304	132.025	0.724205
					Soat1	72.0508	102.439	1.42177
					Ier3	728.099	262.386	0.360372
					Mgrn1	112.565	86.2608	0.766319
					Ccl9	1044.24	520.549	0.498497
					Marco	1334.49	2384.62	1.78691
					Rps24	2695.03	1821.55	0.675893
					Ube2j2	124.118	95.4897	0.769345
					Pcbp1	190.016	258.006	1.35781
					Ssbp4	147.496	104.183	0.706346
					Zranb2	75.8265	107.025	1.41145
					2310036O22Rik	160.476	121.184	0.755154
					Hspa4	188.404	283.267	1.50351
					Vav1	166.212	229.004	1.37778
					Rnf13	70.312	107.936	1.5351
					Eef2	2514.79	1797.83	0.714902
					Rpl12	334.596	468.552	1.40035
					Kdelr2	68.8417	102.008	1.48178
					Tmem189	69.55	103.614	1.48978
					Anxa4	340.292	259.685	0.763125
					Fth1	11275.4	19108.9	1.69473
					Ewsr1	107.425	167.154	1.55601
					Snrpf	78.4555	140.78	1.79439
					Emc7	122.767	186.745	1.52114
					Ncor1	152.204	107.189	0.704242
					Dstn	264.475	180.534	0.682615
					Fas	252.566	140.337	0.555645
					Canx	339.544	463.361	1.36466
					Per1	202.036	116.518	0.576722
					Bub1b	165.379	113.238	0.68472
					Tmem109	129.69	99.5855	0.767876
					Rps20	1944.48	1409.43	0.724836
					Sptlc2	116.305	160.726	1.38194
					Tmbim6	1200.64	879.357	0.732408
					Hexa	505.064	721.332	1.4282
					Cwc15	255.088	196.041	0.768525
					Hnrnpa0	617.525	477.754	0.773659
					Abcf1	129.946	101.331	0.77979
					Zfp706	111.411	153.697	1.37955
					Bud31	103.642	77.4537	0.747324
					Ankrd11	158.858	109.338	0.688273
					Atp5c1	76.223	109.769	1.44011
					Ccdc88a	260.093	179.576	0.690429
					Wbp11	68.7905	100.687	1.46368
					Cd24a	141.741	229.755	1.62094
					Nampt	432.411	304.702	0.704657
					Hsd17b11	277.601	399.691	1.4398
					Aamp	282.631	215.803	0.763549
					Mllt6	190.865	114.694	0.600918
					Hnrnpul2	221.794	160.687	0.724488
					Creg1	580.703	441.134	0.759655
					Pa2g4	192.208	148.03	0.770156
					Tcirg1	151.62	213.677	1.40929
					Arpc5l	88.3065	119.551	1.35382
					2010107E04Rik	354.817	494.616	1.394
					B4galnt1	132.184	182.45	1.38027
					Man2a1	99.2185	153.1	1.54306
					Dynlt3	117.459	89.4675	0.761688
					Trem1	375.303	197.374	0.525905
					Nfe2l2	137.114	108.048	0.788015
					Adam15	146.558	104.953	0.716116
					Mfsd7c	97.6232	150.269	1.53927
					Cib2	106.178	71.385	0.672314
					Prdx2	118.269	159.062	1.34492
					Tmcc3	145.475	113.821	0.78241
					Malsu1	80.6808	124.057	1.53763
					Dock10	258.875	189.283	0.731177
					Fermt3	126.305	93.3985	0.739465
					Arhgap30	183.503	138.558	0.755068
					E430025E21Rik	85.0285	118.217	1.39032
					Ddx21	246.834	178.385	0.722696
					Srsf7	82.3923	113.839	1.38167
					Ppt2	123.085	163.888	1.3315
					Qdpr	144.287	199.573	1.38317
					Cox7a2l	107.678	77.3247	0.718111
					Clec5a	98.7338	151.427	1.53369
					Nckap1l	232.208	181.252	0.78056
					Srsf3	185.111	258.962	1.39896
					Slc7a2	1482.48	966.836	0.652173
					Fau	712.713	962.464	1.35042
					Pld3	953.688	717.668	0.752519
					H2-Ab1	1750.08	1066.05	0.609144
					Rock1	175.232	138.294	0.789207
					Tmem86a	204.806	155.817	0.760801
					Far1	96.9385	135.397	1.39673
					Sdha	157.129	212.793	1.35426
					Pkm	569.259	448.851	0.788484
					Lgals3bp	177.819	259.866	1.46141
					Sub1	235.004	305.964	1.30195
					Cybb	2186.9	1600.81	0.732001
					Cers2	206.119	158.225	0.767638
					Grn	910.191	675.668	0.742336
					Fgr	403.207	292.225	0.724753
					Zcchc2	79.0035	113.797	1.44041
					Picalm	837.72	638.201	0.761831
					Ufsp2	112.623	155.739	1.38284
					Arhgdia	402.255	316.787	0.787527
					Cct8	217.688	293.285	1.34727
					Ddx3x	385.718	281.781	0.730536
					Hdlbp	148.744	112.331	0.755197

## Sheet: 1A3 M vs KO M
1A3-Males					KO-Males					common genes between 1A3 vs KO
	average	average	fold			average	average	fold		1A3 Male					KO Male
Associated_Gene_Name	male	Female	m/f		Associated_Gene_Name	male	Female	m/f		Associated_Gene_Name	male	Female	m/f		Associated_Gene_Name	male	Female	m/f
Xist	788.545	1075.06	0.733489		Xist	526.585	523.463	1.00596		Xist	788.545	1075.06	0.733489		Xist	526.585	523.463	1.00596
Mfge8	29.7752	627.277	0.0474675		Rpl36al	214.576	809.139	0.26519		Zfp36	89.9068	447.543	0.20089		Zfp36	202.57	90.0775	2.24884
Agpat1	42.2325	116.626	0.362121		Cd302	544.712	202.431	2.69085		Tmx1	192.19	127.505	1.50731		Tmx1	171.856	243.902	0.70461
Zfp36	89.9068	447.543	0.20089		Uqcc2	36.571	137.463	0.266042		Spp1	53.2658	160.678	0.331507		Spp1	53.8835	208.334	0.258641
Trem2	30.6412	100.475	0.304965		Ralgds	1028.44	327.018	3.1449		Cox7a2l	77.3483	164.557	0.47004		Cox7a2l	107.678	77.3247	1.39254
Mmp12	6.08475	328.624	0.0185158		Abhd17c	290.729	121.753	2.38786		Bhlhe40	82.9235	187.947	0.441208		Bhlhe40	134.375	90.1515	1.49055
Tap1	37.4625	113.152	0.331082		Icosl	176.678	37.6485	4.69282		Herpud1	151.73	288.232	0.526415		Herpud1	233.39	125.918	1.85351
Bpgm	170.264	28.9962	5.87193		E130309D02Rik	187.056	68.2278	2.74164		Mmp8	42.9562	126.708	0.339018		Mmp8	69.414	141.066	0.492069
Plxnd1	61.521	157.115	0.391565		Lrrk1	104.952	39.5115	2.65623		Rpl36	185.954	108.534	1.71333		Rpl36	231.287	383.03	0.603835
Manf	150.504	378.147	0.398005		Rps11	656.696	2443.06	0.268801		2310036O22Rik	178.597	321.485	0.555536		2310036O22Rik	160.476	121.184	1.32423
AA467197	66.971	523.491	0.127932		Rpl28	486.17	1293.41	0.375883		Rpl38-ps2	109.275	74.5498	1.4658		Rpl38-ps2	135.515	241.07	0.562139
Kdm5c	52.9733	106.303	0.498322		Gm10320	91.9943	256.604	0.358507		Snw1	239.923	162.819	1.47356		Snw1	248.592	134.339	1.85047
Tmx1	192.19	127.505	1.50731		Sh3tc1	965.94	334.062	2.8915		Spryd3	141.352	96.013	1.47221		Spryd3	166.856	103.035	1.61942
Lgmn	39.3695	108.172	0.363952		Rps6	43.5205	153.635	0.283272		Phf1	72.4078	148.935	0.48617		Phf1	103.917	41.2022	2.52211
Angptl4	204.242	96.839	2.10908		mt-Co1	552.17	1522.47	0.36268		Rab5c	3147.76	1941.66	1.62117		Rab5c	2786.89	1879.19	1.48303
Spp1	53.2658	160.678	0.331507		Atpif1	296.411	705.594	0.420087		Mfsd7c	170.133	99.848	1.70392		Mfsd7c	97.6232	150.269	0.649658
Ldlr	126.979	270.607	0.469237		Atp5j	305.241	993.511	0.307235		Pa2g4	241.184	173.772	1.38793		Pa2g4	192.208	148.03	1.29844
S100a1	319.43	656.503	0.486563		Eef1a1	195.919	511.532	0.383004		Rnf10	497.728	312.154	1.59449		Rnf10	387.003	208.84	1.8531
Cox7a2l	77.3483	164.557	0.47004		Serf2	93.1025	217.567	0.427926		Hist1h1c	83.016	170.605	0.486598		Hist1h1c	117.433	327.603	0.358462
Gpnmb	854.082	1650.35	0.517514		Cav2	223.459	87.74	2.54684		Psma3	103.573	70.3907	1.47141		Psma3	96.852	193.922	0.499437
Nars	170.495	110.434	1.54387		Rpl35	391.389	1096.22	0.357034		Prpf19	126.2	90.568	1.39343		Prpf19	101.828	167.939	0.606335
Bhlhe40	82.9235	187.947	0.441208		Hspe1	239.666	715.095	0.335153		Cmip	161.992	260.527	0.621787		Cmip	216.38	152.969	1.41453
Fam220a	132.891	39.1833	3.39153		Prkag1	253.341	115.266	2.19788		Spen	110.062	77.7125	1.41627		Spen	110.799	63.0722	1.7567
Lipf	138.55	25.7115	5.38864		Atp5h	160.732	413.785	0.388442		Mpc2	154.08	93.0302	1.65624		Mpc2	124.069	206.648	0.600384
Hba-a1	13144.8	942.052	13.9534		Rassf1	132.277	55.227	2.39515		Slirp	130.019	95.4675	1.36192		Slirp	124.899	187.145	0.66739
Foxk1	69.759	144.019	0.484374		Dnajc19	34.4145	115.993	0.296694		Cd274	77.7313	171.463	0.453341		Cd274	177.192	83.7225	2.11642
Herpud1	151.73	288.232	0.526415		Pabpc4	232.262	85.5362	2.71537		Pcbp1	222.356	166.229	1.33765		Pcbp1	190.016	258.006	0.73648
C3	110.783	264.017	0.419607		Cox7a2	347.224	885.24	0.392237		Cd300lf	758.102	1678.77	0.451582		Cd300lf	1235.45	603.716	2.04642
Il11ra1	74.958	165.258	0.453582		Rpl10	232.431	864.526	0.268854		Ier3	95.0555	440.169	0.215952		Ier3	728.099	262.386	2.77491
Lrg1	30.5647	211.008	0.144851		Ptbp1	192.455	97.6903	1.97005		Ncor2	154.512	101.028	1.5294		Ncor2	179.81	119.48	1.50494
Rnase2a	1.4085	152.51	0.00923549		Spi1	1414.95	604.172	2.34197		H2-K1	1241.67	2258.03	0.54989		H2-K1	1569.84	1005.34	1.5615
Hba-a2	9315.65	719.827	12.9415		Ube2j1	263.638	125.906	2.09392		E430025E21Rik	109.435	76.6797	1.42717		E430025E21Rik	85.0285	118.217	0.719258
Dpp3	135.225	90.9273	1.48718		Gm2962	37.176	150.105	0.247667		Fnta	165.013	123.527	1.33585		Fnta	129.529	185.767	0.697268
Mmp8	42.9562	126.708	0.339018		Zc3h12a	251.18	81.7322	3.07321		Hnrnpa0	555.914	417.796	1.33059		Hnrnpa0	617.525	477.754	1.29256
Rpl36	185.954	108.534	1.71333		Myh9	692.495	332.638	2.08183		Marco	1073.76	2358.97	0.455183		Marco	1334.49	2384.62	0.559625
Ccl17	44.0175	220.125	0.199966		Anapc13	65.7005	162.507	0.404295		Stx16	101.501	74.2858	1.36636		Stx16	69.8425	124.049	0.563022
Marcks	25.1013	178.102	0.140937		Hcar2	532.829	126.393	4.21565		Dhx9	221.274	146.638	1.50898		Dhx9	225.607	505.343	0.446444
Gins2	104.465	61.6665	1.69402		Ndufa5	317.129	725.609	0.437052		Nmt1	232.515	170.048	1.36735		Nmt1	215.114	133.972	1.60567
Hbb-bs	46650.7	3655.26	12.7626		Asap1	208.494	104.987	1.9859		Fbxl5	99.2368	170.671	0.581451		Fbxl5	113.835	179.393	0.634557
Aprt	330.608	231.024	1.43106		Usmg5	287.705	768.689	0.37428		Gp49a	69.7635	141.064	0.494554		Gp49a	177.939	111.163	1.60069
2310036O22Rik	178.597	321.485	0.555536		Rara	108.311	41.2897	2.6232		Nr4a1	63.6255	223.499	0.28468		Nr4a1	215.039	70.3642	3.05608
Glg1	243.889	157.425	1.54924		Rps13-ps2	225.782	98.357	2.29554		Fabp4	270.813	495.63	0.546402		Fabp4	414.801	824.474	0.503109
Gdf15	78.4617	214.124	0.366431		Cnot1	187.475	72.9095	2.57134		Ets2	49.3503	136.163	0.362434		Ets2	209.028	70.0675	2.98324
Mcm3	125.595	72.0913	1.74217		Hmgcl	1052.06	364.734	2.88446		Irf1	126.637	262.552	0.482333		Irf1	175.645	96.873	1.81314
Mkrn1	255.694	137.155	1.86427		Zdhhc9	110.914	47.567	2.33175		Ddx24	204.685	139.18	1.47065		Ddx24	250.138	143.72	1.74045
Myl6	498.7	321.693	1.55023		Gm10288	111.355	53.0117	2.10058		Fnip1	70.336	120.113	0.585581		Fnip1	117.463	61.3012	1.91617
Ybx1	186.633	396.106	0.47117		Ndufb6	115.281	282.3	0.408363		Ear1	1725.72	1062.04	1.62491		Ear1	1200.25	701.42	1.71118
Tmem216	155.115	95.5675	1.62309		Trf	1922.07	831.48	2.31162		Ssbp4	151.918	252.948	0.60059		Ssbp4	147.496	104.183	1.41574
Cd93	38.278	121.77	0.314345		Sec61b	216.829	514.889	0.421118		Eif5b	280.799	219.495	1.2793		Eif5b	269.144	198.039	1.35904
Serp1	241.579	415.224	0.581804		Snrpd2	64.6552	145.319	0.44492		Unc119	343.548	260.511	1.31874		Unc119	322.051	212.856	1.513
Cdk11b	63.758	117.765	0.541401		Rpl5	180.957	458.008	0.395096		Tap2	224.452	450.173	0.498589		Tap2	276.924	108.946	2.54185
Fam46c	116.129	21.2907	5.45446		Triap1	243.108	115.557	2.10379		Rpl35	327.577	229.514	1.42726		Rpl35	391.389	1096.22	0.357034
Rilpl2	52	117.771	0.441536		Spp1	53.8835	208.334	0.258641		Rpl14	402.966	643.249	0.626455		Rpl14	490.28	320.676	1.5289
Xdh	52.908	111.557	0.474268		Cd82	416.953	175.609	2.37433		Soat1	86.9657	137.353	0.633153		Soat1	72.0508	102.439	0.703351
Clec4b1	123.127	70.6895	1.7418		Fmnl1	135.849	62.9285	2.15878		Cybb	1461.1	2414.01	0.605258		Cybb	2186.9	1600.81	1.36612
Wfdc17	52.2218	192.075	0.271882		Rpl10a	64.3173	162.66	0.395409		Rnf6	110.626	74.515	1.48461		Rnf6	124.893	68.9898	1.81031
Fam89a	187.211	105.703	1.77111		Myeov2	289.405	604.954	0.478392		Atf4	224.644	377.082	0.595743		Atf4	352.309	185.392	1.90035
Igf1	37.096	108.822	0.340889		Furin	1077.79	470.467	2.29089		Junb	132.399	286.716	0.461778		Junb	496.691	230.738	2.15261
Clec7a	741.275	1640.34	0.451903		Rpl30	1045	2915.26	0.358458		Pfkfb4	184.394	144.34	1.2775		Pfkfb4	172.41	126.002	1.36831
Cd63	1081.8	2640.04	0.409768		Ndufv3	129.921	268.712	0.483493		Rpl28	432.112	315.26	1.37065		Rpl28	486.17	1293.41	0.375883
Rpl38-ps2	109.275	74.5498	1.4658		Plekho2	561.736	151.288	3.71302		Coro1c	703.977	517.384	1.36065		Coro1c	700.299	1025.91	0.682615
Snw1	239.923	162.819	1.47356		Rpl35a	255.669	623.444	0.410092		R3hdm4	125.25	216.394	0.578802		R3hdm4	123.149	58.9228	2.09001
Cluh	128.989	91.8632	1.40414		Minos1	174.699	351.509	0.496996		Mtdh	285.483	203.667	1.40171		Mtdh	563.66	376.7	1.49631
Osm	25.161	129.801	0.193842		Prrc2a	103.276	39.1362	2.63888		Atp6v1e1	348.576	530.703	0.656819		Atp6v1e1	520.16	383.972	1.35468
Yipf1	84.4137	142.338	0.593052		Srebf2	231.108	109.807	2.10468		Rpl36al	208.488	149.541	1.39419		Rpl36al	214.576	809.139	0.26519
Spryd3	141.352	96.013	1.47221		Rhoa	4520.69	1591.27	2.84093		Arpc5l	123.073	96.6538	1.27334		Arpc5l	88.3065	119.551	0.738651
Cfp	59.7505	112.418	0.531503		Gm11598	32.4413	103.876	0.312308		Grina	325.745	542.865	0.600048		Grina	436.921	211.041	2.07031
Psme3	135.856	93.3298	1.45566		Kif1c	141.161	77.275	1.82674		Arl8b	111.383	173.287	0.642764		Arl8b	110.824	166.068	0.667341
Cenpb	259.829	176.813	1.46952		Snap29	95.3197	211.871	0.449895		Uhmk1	107.406	168.471	0.637534		Uhmk1	94.761	158.456	0.598028
Ppm1g	189.495	128.445	1.47531		Fabp5	95.0532	272.151	0.349267		Rps16	453.844	348.418	1.30259		Rps16	614.465	1117.22	0.549996
Phf1	72.4078	148.935	0.48617		Jag1	117.469	38.3177	3.06566		Rps23	201.248	152.639	1.31845		Rps23	265.25	561.861	0.472093
Rab5c	3147.76	1941.66	1.62117		Arl6ip5	427.56	165.727	2.57991		Cers2	195.286	293.968	0.664312		Cers2	206.119	158.225	1.3027
Eci2	161.331	110.165	1.46445		Hist1h1c	117.433	327.603	0.358462		Abhd17c	127.31	191.919	0.663353		Abhd17c	290.729	121.753	2.38786
Slc7a11	52.6385	191.387	0.275038		Ptk2b	230.796	109.852	2.10097		Ear2	559.333	380.727	1.46912		Ear2	403.867	804.343	0.502109
Mfsd7c	170.133	99.848	1.70392		Ing1	110.653	44.4495	2.48941		Klf13	400.89	314.488	1.27474		Klf13	465.657	314.341	1.48138
Pa2g4	241.184	173.772	1.38793		Scand1	104.614	58.7355	1.7811		Rtfdc1	124.785	191.275	0.652387		Rtfdc1	145.632	88.8345	1.63936
Rnf10	497.728	312.154	1.59449		Hivep3	716.571	240.246	2.98266		Fam96a	107.363	81.3372	1.31998		Fam96a	91.893	144.222	0.637164
Tsc22d3	123.26	285.433	0.431833		Rps15	279.725	566.33	0.493925		Ctsl	233.036	390.032	0.59748		Ctsl	241.813	466.905	0.517907
Ctsz	1258.12	2241.49	0.561285		Prmt1	219.658	91.0588	2.41227		Fam168b	129.664	102.497	1.26505		Fam168b	118.734	177.588	0.668593
Hist1h1c	83.016	170.605	0.486598		Polr2f	116.294	245.512	0.473682		Tyrobp	1593.86	1172.69	1.35915		Tyrobp	1656.32	2449.06	0.676309
Gal	145.519	82.2825	1.76853		Memo1	38.8188	123.337	0.314737		Plaur	75.297	137.309	0.548378		Plaur	152.549	83.5445	1.82596
Jund	84.0595	146.586	0.573449		Lypla2	421.818	227.636	1.85304		Tcirg1	106.478	165.463	0.643519		Tcirg1	151.62	213.677	0.709577
Atp6v0d1	242.153	404.684	0.598375		Dync1i2	306.826	161.435	1.90062		Ccnl1	73.3773	121.082	0.606015		Ccnl1	110.031	67.4378	1.6316
Tppp3	227.783	127.219	1.79048		Mfsd5	276.681	147.381	1.87731		Sdhc	164.832	126.625	1.30173		Sdhc	143.051	229.918	0.622181
Fcgr4	156.761	288.559	0.543255		Ola1	79.0653	162.665	0.486063		Stom	118.013	176.981	0.666814		Stom	112.219	69.7493	1.60889
Gga1	87.7083	149.023	0.588553		Ndufs5	29.1978	104.016	0.280704		Gla	98.3438	151.257	0.650175		Gla	107.768	55.996	1.92457
Rbm47	86.3468	155.959	0.553651		Rps23	265.25	561.861	0.472093		Card11	165.977	127.448	1.30231		Card11	105.246	74.0393	1.4215
B2m	1495.16	2789.68	0.53596		Iqsec1	355.526	180.716	1.96732		Pip5k1a	106.017	76.7678	1.38101		Pip5k1a	136.461	67.6252	2.0179
Dgat1	88.4432	207.087	0.427083		Rps3a1	169.881	390.286	0.435274		Fus	1560.6	1088.61	1.43357		Fus	2409.7	1166.51	2.06573
Lsr	266.458	159.814	1.6673		Rps27l	117.737	257.883	0.456553		Vapb	385.75	299.845	1.2865		Vapb	346.01	242.571	1.42643
Sgk1	318.806	591.934	0.538584		Ap2b1	129.901	60.0345	2.16377		Tuba1c	429.511	322.931	1.33004		Tuba1c	561.35	387.354	1.44919
Psma3	103.573	70.3907	1.47141		Ube2h	133.749	70.0012	1.91066		Sec63	126.159	183.995	0.685662		Sec63	165.969	108.218	1.53364
Prpf19	126.2	90.568	1.39343		Mir142hg	123.093	46.5862	2.64227		Gde1	87.7772	130.592	0.67215		Gde1	180.897	111.672	1.61989
Mgll	379.897	675.395	0.562482		Phf1	103.917	41.2022	2.52211		Nagpa	260.472	211.065	1.23409		Nagpa	196.077	143.553	1.36589
E2f1	170.005	111.814	1.52043		Fxr2	183.826	98.7947	1.86069		Hcar2	189.137	370.668	0.51026		Hcar2	532.829	126.393	4.21565
Atic	263.455	158.51	1.66206		Dst	189.833	86.9935	2.18215		Hmox1	160.218	255.739	0.626491		Hmox1	144.613	92.33	1.56626
Cmip	161.992	260.527	0.621787		Got2	179.951	95.8208	1.878		Ddx21	189.624	139.531	1.359		Ddx21	246.834	178.385	1.38371
Sat1	80.1613	161.7	0.495742		Sec61g	70.1815	180.695	0.388397		Nampt	194.489	318.564	0.610518		Nampt	432.411	304.702	1.41913
Dctn3	177.369	129.21	1.37271		Tmem11	159.334	87.5312	1.82031		Pim1	106.148	200.588	0.529183		Pim1	345.244	188.928	1.82738
Spen	110.062	77.7125	1.41627		Snw1	248.592	134.339	1.85047		Hsd17b11	264.792	200.923	1.31788		Hsd17b11	277.601	399.691	0.694539
Mpc2	154.08	93.0302	1.65624		Aup1	138.341	62.504	2.21331		Ctsk	770.47	1373.86	0.560808		Ctsk	769.175	1601.02	0.480429
Il1b	96.2858	518.218	0.185802		Rae1	113.97	61.1337	1.86426		Cbfb	137.765	109.034	1.2635		Cbfb	115.107	168.185	0.684406
Mrpl4	120.099	83.6928	1.435		B4galt1	1088.14	555.501	1.95885		Axl	816.289	643.693	1.26813		Axl	804.608	535.335	1.503
Fam134a	147.842	230.878	0.640345		Rnf19b	153.302	54.2625	2.82519		Pdia6	254.591	361.933	0.703419		Pdia6	224.986	350.409	0.642067
Lpl	3597.63	2241.7	1.60486		Stt3a	65.3307	127.197	0.513618		Srebf2	164.369	246.589	0.666569		Srebf2	231.108	109.807	2.10468
Slirp	130.019	95.4675	1.36192		Lfng	103.269	56.1333	1.83971		Lhfpl2	96.2575	148.998	0.646032		Lhfpl2	74.8858	117.014	0.639971
Alas2	937.718	146.436	6.40363		Rhoc	721.574	376.248	1.91782		Mgat4b	286.105	231.938	1.23354		Mgat4b	288.297	201.211	1.43281
43531	55.1762	100.597	0.548485		Bst1	323.638	678.261	0.477158		Pltp	145.305	96.1755	1.51083		Pltp	105.527	54.6453	1.93112
Acp5	173.86	319.465	0.544222		Fcgr2b	113.174	266.75	0.424271		Rps4x	126.952	97.655	1.30001		Rps4x	144.769	280.36	0.516367
Cd274	77.7313	171.463	0.453341		Dnajc7	127.838	64.0648	1.99546		Lfng	87.2175	126.728	0.688226		Lfng	103.269	56.1333	1.83971
Unc93b1	157.007	292.18	0.537362		Rps27a	191.297	386.512	0.494934		Stk24	269.876	214.479	1.25829		Stk24	388.366	258.469	1.50257
Pcbp1	222.356	166.229	1.33765		Pet100	51.307	120.457	0.425937		Rpl31	820.711	621.664	1.32018		Rpl31	962.326	1536.57	0.626283
Tgfbr1	210.669	149.255	1.41147		Ier5	511.766	249.01	2.0552		Myh9	543.74	432.152	1.25821		Myh9	692.495	332.638	2.08183
Krt79	1429.03	958.604	1.49074		Gla	107.768	55.996	1.92457		Bub1b	114.471	83.8202	1.36567		Bub1b	165.379	113.238	1.46045
Cd300lf	758.102	1678.77	0.451582		Ifngr1	255.683	133.861	1.91007		Pafah1b1	212.989	175.574	1.2131		Pafah1b1	221.397	326.743	0.677589
Ier3	95.0555	440.169	0.215952		Psma3	96.852	193.922	0.499437		Emd	171.54	135.905	1.26221		Emd	195.461	137.938	1.41702
Ncor2	154.512	101.028	1.5294		Slc25a4	142.74	271.707	0.525345		Pik3cd	147.867	234.529	0.630483		Pik3cd	166.571	99.7103	1.67055
Rassf4	330.093	239.705	1.37708		Herpud1	233.39	125.918	1.85351		Rpl5	145.611	109.461	1.33026		Rpl5	180.957	458.008	0.395096
H2-K1	1241.67	2258.03	0.54989		Rad23b	319.749	185.168	1.7268		Atp5h	167.935	131.277	1.27924		Atp5h	160.732	413.785	0.388442
E430025E21Rik	109.435	76.6797	1.42717		Ptpn12	537.44	286.201	1.87784		Pmepa1	105.06	77.9257	1.3482		Pmepa1	195.152	124.531	1.5671
Fnta	165.013	123.527	1.33585		Chmp5	51.1545	104.359	0.490179		Tonsl	424.659	347.084	1.22351		Tonsl	439.23	305.096	1.43965
Srsf9	103.716	180.956	0.573156		Fam129b	787.552	396.339	1.98707		Npepps	106.557	153.302	0.695081		Npepps	113.257	75.5408	1.49928
Nlrx1	185.163	132.192	1.40071		Lpcat3	549.702	235.446	2.33472		Ube2j1	225.484	183.915	1.22602		Ube2j1	263.638	125.906	2.09392
Nap1l4	327.045	240.251	1.36127		Sh3pxd2b	765.518	389.529	1.96524		Dgkz	246.135	380.238	0.647319		Dgkz	299.134	142.942	2.09269
Mvd	93.2537	163.476	0.570444		U2af2	450.808	216.669	2.08063		Ralgds	370.533	573.03	0.64662		Ralgds	1028.44	327.018	3.1449
Hnrnpa0	555.914	417.796	1.33059		Ddx39b	254.322	139.141	1.8278		Cnot1	166.704	262.829	0.63427		Cnot1	187.475	72.9095	2.57134
Slamf9	294.9	212.597	1.38713		Dhx9	225.607	505.343	0.446444		Tapbp	391.391	578.854	0.676147		Tapbp	526.427	352.986	1.49135
Chil3	8056.12	19065.2	0.422555		Ociad1	350.175	204.309	1.71395		Rpl35a	204.141	154.827	1.31851		Rpl35a	255.669	623.444	0.410092
Bckdk	74.5885	136.607	0.546006		Dgkz	299.134	142.942	2.09269		Rps28	1226.97	977.796	1.25483		Rps28	1404.56	2203.22	0.637503
Serbp1	790.293	559.315	1.41297		Mrpl20	63.035	131.795	0.478282		Nucb1	77.6138	114.093	0.680267		Nucb1	74.154	112.079	0.661621
B3gnt7	78.8055	153.551	0.51322		Tpt1	374.363	934.817	0.400467		Actr10	118.776	99.7818	1.19036		Actr10	145.373	112.326	1.2942
Marco	1073.76	2358.97	0.455183		Dbi	789.422	1587.67	0.497221		Ndufb9	156.426	125.703	1.24441		Ndufb9	137.862	205.227	0.671754
Eef1g	99.6875	161.996	0.61537		Arf5	439.08	223.064	1.9684		Actl6a	158.343	132.471	1.1953		Actl6a	129.446	88.7215	1.45901
Il10rb	109.127	196.14	0.556372		Zswim8	164.916	88.577	1.86184		Rps29	1567.81	1208.59	1.29722		Rps29	1772.04	1236.54	1.43306
Trim41	62.5533	103.733	0.603023		Rpl6	389.689	740.436	0.526297		Saraf	339.643	280.755	1.20975		Saraf	326.706	236.792	1.37972
Stx16	101.501	74.2858	1.36636		Apbb1ip	434.474	252.916	1.71786		Atp5j	294.591	216.197	1.36261		Atp5j	305.241	993.511	0.307235
Dhx9	221.274	146.638	1.50898		Ndufa1	504.263	1091.78	0.461872		Zswim8	147.844	214.272	0.689983		Zswim8	164.916	88.577	1.86184
Copz1	116.774	188.496	0.619502		Rcl1	373.924	133.189	2.80746		Marveld1	206.355	167.917	1.22891		Marveld1	163.276	94.7392	1.72342
Smap2	129.944	215.73	0.602348		Mrps18c	60.8407	175.542	0.346588		Csnk2b	158.214	230.129	0.687504		Csnk2b	171.882	98.7687	1.74025
Neurl1b	163.512	116.337	1.40551		Rps10	947.332	539.925	1.75456		Hdc	57.7307	305.207	0.189153		Hdc	373.147	74.67	4.99727
Nmt1	232.515	170.048	1.36735		Mrps21	47.3825	108.632	0.436172		Atpif1	321.182	261.319	1.22908		Atpif1	296.411	705.594	0.420087
Dusp6	91.189	174.057	0.523904		Slc25a5	175.149	420.068	0.416953		Jagn1	135.795	104.457	1.30001		Jagn1	134.629	77.5135	1.73684
Cyp51	123.394	236.346	0.522092		Kdm6b	109.821	26.8818	4.08532
Fbxl5	99.2368	170.671	0.581451		Bcl3	160.751	55.981	2.87153
Fabp1	203.511	111.918	1.81839		Rpl41	100.925	196.546	0.513497		common	142
Gp49a	69.7635	141.064	0.494554		Hsd17b12	624.653	342.292	1.82491		up regulated in both	0	yellow background
Eif3g	136.402	99.272	1.37402		Grina	436.921	211.041	2.07031		1A3 up-KO down	0	red
Ube2l6	118.289	51.9997	2.27479		Aim2	152.633	72.419	2.10763		1A3 down-KO up	19	black
Glud1	772.251	564.688	1.36757		Lims1	57.2752	119.481	0.479369		1A3=KO	123	green
Rgcc	65.5285	197.391	0.331973		F7	499.978	958.009	0.521893
Nr4a1	63.6255	223.499	0.28468		Psmd4	365.16	185.215	1.97155			142
Fabp4	270.813	495.63	0.546402		Ndufa13	301.806	531.274	0.568079
Trappc3	129.724	84.0247	1.54388		Peli1	180.646	88.8985	2.03205
Atg101	69.768	115.502	0.604039		Polr2m	99.7548	223.798	0.445736
Ctsb	506.671	844.495	0.59997		Aldh2	317.683	152.79	2.07921
Ppp2r1b	103.566	75.2185	1.37686		Evl	62.7832	146.971	0.42718
Ets2	49.3503	136.163	0.362434		Txn-ps1	59.451	156.084	0.38089
Irf1	126.637	262.552	0.482333		Csnk2b	171.882	98.7687	1.74025
Ddx24	204.685	139.18	1.47065		Sec13	50.5403	100.339	0.503694
Aplp2	436.601	326.664	1.33654		Eif2s2	351.207	188.637	1.86181
Aifm2	62.2743	108.431	0.574319		Psma4	64.3595	154.238	0.417275
H2-DMa	190.007	136.237	1.39468		Socs2	156.269	67.9838	2.29863
Psmd2	166.407	246.484	0.675126		Ubc	2580.15	961.772	2.68271
Rpl9-ps6	98.0235	158.559	0.618214		Mark2	191.698	87.5215	2.19029
Fnip1	70.336	120.113	0.585581		Pabpc1	609.632	325.983	1.87014
Brk1	214.485	169.364	1.26641		Drap1	152.944	91.0945	1.67896
Cidec	666.714	409.167	1.62944		Spen	110.799	63.0722	1.7567
Ear1	1725.72	1062.04	1.62491		Npc1	181.32	110.696	1.638
Ssbp4	151.918	252.948	0.60059		Atp6v1a	269.823	478.839	0.563495
Arrdc1	89.189	148.167	0.601949		Glrx3	58.791	114.01	0.515668
Use1	121.75	86.326	1.41036		Rela	378.976	217.955	1.73878
Chchd10	47.5095	103.874	0.457375		Pip5k1a	136.461	67.6252	2.0179
Romo1	166.865	116.574	1.4314		Polr2k	30.0292	102.944	0.291705
Tuba4a	544.384	380.84	1.42943		Amdhd2	88.5478	163.467	0.541687
Eif5b	280.799	219.495	1.2793		Rps16	614.465	1117.22	0.549996
Lsp1	397.067	277.441	1.43117		Dnaja2	182.186	114.917	1.58537
Unc119	343.548	260.511	1.31874		Rps4x	144.769	280.36	0.516367
Tap2	224.452	450.173	0.498589		Cap1	119.087	63.5755	1.87316
Acsl5	193.418	138.983	1.39166		Snrpd3	408.846	196.352	2.08221
Rpl35	327.577	229.514	1.42726		Spcs3	79.6275	225.976	0.352372
Tsn	212.523	159.264	1.3344		Prpf8	162.081	97.261	1.66645
Rpl14	402.966	643.249	0.626455		Arpc3	1010.06	554.845	1.82043
Psma2	348.264	268.109	1.29896		Gnai2	1088.6	626.074	1.73878
Soat1	86.9657	137.353	0.633153		Jdp2	104.32	36.616	2.84903
Sepp1	363.066	256.155	1.41737		2510039O18Rik	122.774	69.8465	1.75777
Cybb	1461.1	2414.01	0.605258		Rpl38-ps2	135.515	241.07	0.562139
Cyba	874.114	1366.65	0.639602		Eef1b2	605.011	1143.15	0.529247
Rnf6	110.626	74.515	1.48461		Marveld1	163.276	94.7392	1.72342
Atf4	224.644	377.082	0.595743		Arhgef2	185.129	105.664	1.75206
Pgls	250.759	416.64	0.60186		Stx16	69.8425	124.049	0.563022
Plin3	82.3063	136.589	0.602584		Clic1	781.86	379.704	2.05913
Tceb2	224.101	175.674	1.27566		Ino80b	25.9968	11.598	2.24149
Lrrc59	150.655	115.625	1.30296		Ndufa4	73.979	171.818	0.430567
Atxn10	275.967	210.31	1.31219		Ftl1	1154.93	2646.44	0.436408
Junb	132.399	286.716	0.461778		Lrp1	714.821	431.562	1.65636
Csnk1d	201.969	156.975	1.28662		Rpl18a	128.754	246.384	0.522572
Znhit1	80.217	143.812	0.557792		Atf4	352.309	185.392	1.90035
Lage3	71.9257	115.436	0.62308		Tap2	276.924	108.946	2.54185
Ubash3b	195.97	143.88	1.36203		Tmem258	261.979	544.317	0.481299
Pfkfb4	184.394	144.34	1.2775		R3hdm4	123.149	58.9228	2.09001
S100a8	128.647	914.904	0.140613		Ssh2	111.817	59.7835	1.87036
Gars	225.651	175.499	1.28576		Tmem63a	116.582	69.23	1.68399
Psmd3	265.58	210.408	1.26221		Aldoc	44.58	102.621	0.434414
Rpl28	432.112	315.26	1.37065		Hnrnpa2b1	244.947	560.658	0.436892
Coro1c	703.977	517.384	1.36065		Tcf25	428.569	266.529	1.60796
Hbb-bt	7363.8	1565.93	4.70252		Cd74	704.118	322.809	2.18122
Nedd9	190.093	139.339	1.36425		Stk40	138.89	78.0993	1.77838
Tmem259	109.229	164.188	0.66527		Fnip1	117.463	61.3012	1.91617
R3hdm4	125.25	216.394	0.578802		Tmem50a	833.604	472.398	1.76462
Cebpb	310.25	617.323	0.502574		Pycard	63.9557	126.043	0.50741
Mtdh	285.483	203.667	1.40171		Gripap1	118.075	67.948	1.73772
Atp6v1e1	348.576	530.703	0.656819		Chd8	121.497	71.971	1.68814
Dhrs1	131.398	97.328	1.35006		Rpl38	558.69	965.777	0.578487
Myo1f	194.121	135.593	1.43165		Nf2	103.492	60.2463	1.71781
Luzp1	111.675	80.8843	1.38068		Hspd1	58.3312	112.386	0.519028
Amz1	527.108	356.836	1.47717		Psap	3428.4	7479.63	0.458364
Cttnbp2nl	217.584	144.867	1.50196		Rpl37a	3372.59	6925.63	0.486973
Rpl36al	208.488	149.541	1.39419		Btk	228.634	111.212	2.05583
Arpc5l	123.073	96.6538	1.27334		Fus	2409.7	1166.51	2.06573
Eif4g1	200.776	158.965	1.26301		Plekhg1	212.034	128.144	1.65466
Cyb5a	158.193	120.386	1.31404		Atp5f1	101.053	189.853	0.532268
Bzw2	184.755	138.426	1.33468		Spcs1	138.32	238.653	0.579588
Grina	325.745	542.865	0.600048		Ehd1	820.473	370.421	2.21497
Arl8b	111.383	173.287	0.642764		Atp5a1	591.273	1071.87	0.551627
Tor1aip2	175.724	139.083	1.26344		Sin3b	496.865	255.577	1.94409
Cd84	190.622	287.77	0.662413		Magoh	233.853	152.139	1.5371
Hsp90aa1	107.435	73.259	1.46651		Ccdc47	90.2608	203.339	0.443892
Uhmk1	107.406	168.471	0.637534		Anxa1	190.023	436.132	0.4357
Commd7	188.108	151.9	1.23837		Rab11b	147.279	86.4732	1.70317
Clec4n	1133.87	801.528	1.41463		Cisd2	63.23	110.701	0.57118
Ccl4	21.4545	177.005	0.121208		Tmed3	81.4333	156.59	0.52004
Gpd2	119.471	93.7335	1.27458		Tmem167	99.5303	193.931	0.513224
Lsm6	127.287	91.3483	1.39342		Snrpe	192.053	347.096	0.553315
Rps16	453.844	348.418	1.30259		43532	117.238	215.399	0.544284
Tuba1b	380.802	263.08	1.44748		Rps12	227.614	454.664	0.500621
Slco2b1	103.369	67.4043	1.53357		43710	92.116	166.772	0.552349
Rps23	201.248	152.639	1.31845		Arpp19	333.107	581.604	0.57274
Cers2	195.286	293.968	0.664312		Add3	58.5523	103.965	0.563193
P2ry13	474.626	319.513	1.48547		Gde1	180.897	111.672	1.61989
Abhd17c	127.31	191.919	0.663353		Slc48a1	465.265	261.782	1.7773
Tmsb10	64.8302	106.535	0.608535		Dynlrb1	115.32	215.37	0.53545
Ear2	559.333	380.727	1.46912		Ppp1r18	320.365	199.567	1.6053
Lmna	654.139	475.21	1.37652		Sec24c	55.873	102.364	0.545825
Klf13	400.89	314.488	1.27474		Sema4a	247.442	145.585	1.69964
Alox5	232.07	156.886	1.47923		2410015M20Rik	118.862	206.186	0.576481
Rtfdc1	124.785	191.275	0.652387		Golga2	133.571	82.704	1.61505
Fam96a	107.363	81.3372	1.31998		Rps25	2874.72	1639.69	1.75321
Dpm3	127.175	91.0067	1.39743		Psme1	261.264	175.89	1.48539
Irg1	19.6625	142.014	0.138454		Setd8	265.31	152.108	1.74422
H2afy	85.422	130.067	0.656755		Abracl	233.467	440.526	0.529973
Ctsl	233.036	390.032	0.59748		Psme2b	74.1243	132.323	0.560178
Fam168b	129.664	102.497	1.26505		Gm5963	375.963	248.771	1.51128
Rpl11	839.856	663.322	1.26614		Cisd1	64.5105	119.737	0.538769
Tyrobp	1593.86	1172.69	1.35915		Ak2	217.644	125.704	1.7314
Prkcd	103.106	160.865	0.640945		Baz2b	147.218	90.7823	1.62166
Ddx5	256.629	390.027	0.657977		Chmp4b	1382.33	813.325	1.6996
Anxa5	509.08	410.244	1.24092		Nmt1	215.114	133.972	1.60567
Rac1	640.384	498.056	1.28577		Eif3j2	105.212	52.4195	2.00711
Plaur	75.297	137.309	0.548378		Riok3	225.939	138.847	1.62725
Tpra1	61.2212	106.323	0.575804		Tspo	181.632	359.074	0.505834
Tcirg1	106.478	165.463	0.643519		Rtfdc1	145.632	88.8345	1.63936
Kazald1	108.686	62.7383	1.73237		Etfa	56.6803	128.624	0.440666
Fcgr3	372.83	591.772	0.630023		Urm1	132.791	78.3023	1.69588
Ccnl1	73.3773	121.082	0.606015		Tle3	127.748	77.156	1.6557
Cdh1	288.07	573.565	0.502244		Fam120a	251.026	163.881	1.53176
Cpsf1	109.504	87.4522	1.25216		Acap2	97.0793	179.881	0.539686
Elavl1	80.3955	127.478	0.630661		1810022K09Rik	128.132	249.155	0.514265
Sdhc	164.832	126.625	1.30173		Myd88	223.756	132.45	1.68936
Bst2	67.1713	124.265	0.540547		Ndufs4	80.3852	137.143	0.586143
Stom	118.013	176.981	0.666814		Trappc1	94.1692	171.242	0.549921
Gla	98.3438	151.257	0.650175		Anxa2	6479.17	3516.63	1.84244
Spint1	111.822	79.215	1.41163		Mcoln3	63.9635	144.147	0.443738
S100a9	100.38	885.588	0.113348		Notch2	137.744	274.039	0.502642
Card11	165.977	127.448	1.30231		Tceb1	89.1243	212.673	0.419068
Pip5k1a	106.017	76.7678	1.38101		Btf3	37.2215	100.874	0.368988
Chmp3	241.459	196.929	1.22612		Fabp4	414.801	824.474	0.503109
Fus	1560.6	1088.61	1.43357		Actn1	709.667	458.515	1.54775
Vapb	385.75	299.845	1.2865		Btbd9	111.709	58.6937	1.90325
Cd36	242.973	397.82	0.61076		Idh3g	124.589	71.8713	1.73351
P2rx4	120.095	183.69	0.653796		Ski	243.807	155.381	1.56909
Vimp	123.428	186.321	0.662449		Uqcrq	236.194	386.341	0.611362
6330416G13Rik	114.919	92.2555	1.24567		Flna	1279.74	792.734	1.61434
Tuba1c	429.511	322.931	1.33004		Rin3	138.066	74.8417	1.84477
Pitpna	468.129	369.652	1.26641		Spryd3	166.856	103.035	1.61942
Sec63	126.159	183.995	0.685662		Cox8a	404.616	723.757	0.55905
Perp	115.482	81.7905	1.41192		Ndufb2	62.88	137.723	0.456569
Gde1	87.7772	130.592	0.67215		Hr	140.192	55.107	2.54399
Scarb1	177.489	130.344	1.36169		Rnf10	387.003	208.84	1.8531
Spns1	140.847	215.741	0.652851		Eny2	54.8798	108.391	0.506314
Mapk3	787.683	1217.42	0.647008		Cebpa	949.655	424.294	2.2382
Nagpa	260.472	211.065	1.23409		Ndufab1	58.7945	108.346	0.542655
Ncl	658.076	514.28	1.27961		Prpf19	101.828	167.939	0.606335
Hcar2	189.137	370.668	0.51026		Rnf6	124.893	68.9898	1.81031
Lasp1	169.807	268.799	0.631724		Bola2	300.871	481.058	0.625436
Plcg2	108.259	82.0895	1.31879		Eml2	169.45	82.8272	2.04582
Mtmr6	159.968	124.182	1.28817		Ddx24	250.138	143.72	1.74045
Hmox1	160.218	255.739	0.626491		Sec63	165.969	108.218	1.53364
Mtch1	113.8	171.403	0.663935		Ctsa	1471.02	910.432	1.61574
Map2k2	413.39	300.046	1.37775		Ctsl	241.813	466.905	0.517907
Ddx21	189.624	139.531	1.359		Gnl1	111.117	71.3547	1.55724
Clptm1	164.038	131.06	1.25163		Selt	71.204	137.615	0.517415
Sod1	313.466	251.267	1.24754		Huwe1	135.13	83.9672	1.60932
Nampt	194.489	318.564	0.610518		Uqcrb	125.265	226.155	0.553889
Ahnak	847.04	648.87	1.30541		Cflar	285.801	139.805	2.04428
Ch25h	98.8675	246.732	0.400708		Ear2	403.867	804.343	0.502109
Pim1	106.148	200.588	0.529183		Srsf5	206.234	112.364	1.83542
Hsd17b11	264.792	200.923	1.31788		Gm6265	66.0482	125.685	0.525506
Dlst	198.404	164.638	1.20509		Mdh2	334.986	214.394	1.56248
Ctsk	770.47	1373.86	0.560808		Gak	170.421	111.085	1.53415
Msmo1	99.813	158.7	0.628942		Commd3	77.3135	128.626	0.601072
Cbfb	137.765	109.034	1.2635		Jagn1	134.629	77.5135	1.73684
Pfn1	225.532	383.04	0.588796		Taok3	167.863	98.0418	1.71216
Axl	816.289	643.693	1.26813		Nxf1	60.6423	115.251	0.526177
Cd52	530.42	783.841	0.676694		Eif4h	189.764	325.144	0.58363
Mmp19	352.078	580.8	0.606195		Tagln2	3779.93	2201.14	1.71726
Srsf11	162.064	134.016	1.20929		Atrnl1	51.7375	121.013	0.427538
Pdia6	254.591	361.933	0.703419		Irf5	168.796	97.985	1.72267
Atg2a	72.0465	112.704	0.639253		Lcp2	174.666	96.9032	1.80248
Myl12a	393.193	315.75	1.24527		Fam21	113.781	76.5853	1.48567
Srebf2	164.369	246.589	0.666569		Msn	886.571	562.048	1.57739
Lhfpl2	96.2575	148.998	0.646032		Acin1	119.561	72.077	1.6588
Camkk2	222.279	174.5	1.27381		Rpl22	534.312	906.746	0.589263
Map1lc3a	266.796	199.754	1.33562		Mpdu1	308.412	189.464	1.62782
Mgat4b	286.105	231.938	1.23354		S100a10	397.689	697.102	0.570488
Btg1	93.855	150.157	0.625046		Pdia6	224.986	350.409	0.642067
Slc9a4	171.064	132.418	1.29185		Srp14	218.988	354.221	0.618225
Pltp	145.305	96.1755	1.51083		Rps27	565.995	967.519	0.584997
Rps4x	126.952	97.655	1.30001		Wfdc21	1265.55	2692.78	0.469981
Lfng	87.2175	126.728	0.688226		Fam105a	81.559	168.736	0.483353
Stk24	269.876	214.479	1.25829		Becn1	153.301	102.215	1.4998
Fcgrt	237.428	172.474	1.37661		Stom	112.219	69.7493	1.60889
Rpl31	820.711	621.664	1.32018		Ctsc	535.654	968.795	0.552907
Myh9	543.74	432.152	1.25821		Slc38a1	153.01	102.446	1.49357
Arglu1	131.128	107.557	1.21915		Ppp3r1	430.996	267.091	1.61367
Bub1b	114.471	83.8202	1.36567		Uba1	253.979	168.995	1.50288
Pafah1b1	212.989	175.574	1.2131		Psmd13	285.211	181.33	1.57288
Aldoa	602.476	896.739	0.671852		Ptms	460.407	296.436	1.55314
Chic2	137.26	103.355	1.32804		Nfkbib	180.343	92.9385	1.94046
Ndufb11	108.493	85.9718	1.26196		Cnih4	82.2283	139.442	0.589693
4933426M11Rik	82.4688	137.258	0.600831		Dohh	115.069	66.4813	1.73084
Emd	171.54	135.905	1.26221		Mkks	62.6295	120.008	0.521877
Hspa5	1307.23	2121.62	0.616147		Spag9	119.763	73.4103	1.63142
Gpx1	1996.74	1497.07	1.33377		Srxn1	177.375	106.215	1.66995
Pik3cd	147.867	234.529	0.630483		Ufc1	80.0748	136.889	0.584959
Phlpp1	7.25775	3.88425	1.86851		Dync1h1	221.868	143.586	1.5452
Toporsos	26.8153	17.8505	1.50221		Snord89	114.767	25.3795	4.52205
Plekhm2	155.121	229.873	0.67481		Ndufc1	120.496	213.334	0.564826
Srgn	156.227	409.286	0.381705		AI662270	115.167	68.2127	1.68835
Rpl5	145.611	109.461	1.33026		Rab11fip1	105.823	57.5953	1.83735
Parvg	158.326	121.737	1.30056		Iqgap1	2463.99	1576.62	1.56283
Atp5h	167.935	131.277	1.27924		Atp6v0d2	641.176	1117.01	0.574009
Rps17	241.215	192.178	1.25516		Atp13a2	91.7722	150.911	0.60812
Pmepa1	105.06	77.9257	1.3482		Stk38	210.867	123.378	1.70912
Cyb5r3	658.675	513.937	1.28163		Erp29	149.801	232.663	0.643856
Basp1	95.8017	238.742	0.401278		Eif3i	165.833	249.759	0.663971
Phlda1	168.112	109.358	1.53726		Zbtb22	108.102	65.9015	1.64036
Tonsl	424.659	347.084	1.22351		Prkaca	209.76	126.249	1.66148
Sun2	221.057	179.965	1.22834		Cln5	257.807	166.848	1.54516
Npepps	106.557	153.302	0.695081		Ets2	209.028	70.0675	2.98324
Fkbp1a	322.37	257.255	1.25311		Azin1	74.8785	120.858	0.619559
Ube2j1	225.484	183.915	1.22602		Atp5g2	54.2165	118.185	0.458743
Rpsa-ps10	12.122	6.755	1.79452		Uhmk1	94.761	158.456	0.598028
Dgkz	246.135	380.238	0.647319		Smarcc2	225.85	113.619	1.98778
Ralgds	370.533	573.03	0.64662		Ly75	360.636	227.89	1.5825
Cnot1	166.704	262.829	0.63427		Fbxl14	87.4762	198.706	0.440231
Slc25a39	144.783	118.918	1.2175		Pttg1	101.198	66.7843	1.5153
Tapbp	391.391	578.854	0.676147		2310047M10Rik	173.279	106.906	1.62085
Rpl35a	204.141	154.827	1.31851		Ppm1a	165.066	107.281	1.53863
Gnai3	86.4738	133.964	0.6455		Vat1	491.273	318.76	1.5412
Ptafr	38.2692	100.177	0.382017		Unc119	322.051	212.856	1.513
Rps28	1226.97	977.796	1.25483		Vasp	1444.57	852.315	1.69488
Alox5ap	754.611	590.183	1.27861		Rps2	158.564	278.992	0.568347
Nucb1	77.6138	114.093	0.680267		Wasf2	127.307	83.9363	1.51671
Actr10	118.776	99.7818	1.19036		Bax	104.455	61.714	1.69257
Tacc1	159.931	128.286	1.24667		Flot2	170.77	109.984	1.55268
Ndufb9	156.426	125.703	1.24441		Rpl39	1114.54	2013.32	0.553582
Actl6a	158.343	132.471	1.1953		Setd5	205.912	125.631	1.63902
Ppp6r3	166.873	137.661	1.2122		Pla2g16	75.2177	140.384	0.535799
Rps29	1567.81	1208.59	1.29722		Kctd10	109.125	70.8383	1.54048
Deptor	101.948	79.8762	1.27632		Spn	50.7165	102.928	0.492739
Saraf	339.643	280.755	1.20975		Gng5	104.076	197.759	0.526276
Anapc11	231.137	195.303	1.18348		Cd274	177.192	83.7225	2.11642
Atp5j	294.591	216.197	1.36261		Rcc2	129.407	79.3332	1.63118
Capn2	247.263	203.016	1.21795		Pdia3	908.644	469.692	1.93455
Zswim8	147.844	214.272	0.689983		Slc7a5	238.205	129.714	1.83638
Slc16a3	69.405	132.426	0.524105		Ctsk	769.175	1601.02	0.480429
Marveld1	206.355	167.917	1.22891		Acaa1b	424.653	201.548	2.10695
Kdm4a	129.787	104.163	1.24601		Pltp	105.527	54.6453	1.93112
Atp5e	619.394	886.84	0.698428		Hmgcs1	121.603	195.24	0.622841
Csnk2b	158.214	230.129	0.687504		Ndufv2	84.6925	141.938	0.596688
Hdc	57.7307	305.207	0.189153		Slc38a10	219.766	148.936	1.47557
Klf10	109.179	89.6568	1.21774		2310011J03Rik	124.128	79.869	1.55415
Atpif1	321.182	261.319	1.22908		Plec	591.832	361.81	1.63575
Jagn1	135.795	104.457	1.30001		Glyr1	228.673	421.75	0.5422
Arf1	301.238	246.762	1.22076		Sirt2	359.034	254.216	1.41232
Nasp	130.782	103.483	1.26381		Krtcap2	232.146	364.04	0.637695
Wdfy3	121.289	96.5462	1.25628		Axl	804.608	535.335	1.503
					Capn1	232.826	125.019	1.86232
					D8Ertd738e	93.9743	152.251	0.617231
					Rsl1d1	217.382	143.765	1.51207
					Anapc5	164.992	108.383	1.5223
					Cltc	442.226	302.2	1.46335
					Ppp1r9b	163.647	109.772	1.49078
					Hsdl1	104.534	173.172	0.603644
					Skil	156.51	95.0877	1.64596
					Rassf5	123.028	80.279	1.5325
					Lmnb1	356.356	120.545	2.9562
					Exosc5	114.504	77.658	1.47447
					Npepps	113.257	75.5408	1.49928
					Eif3h	364.396	231.617	1.57327
					Lcp1	1418.62	933.536	1.51962
					Atp6v1g1	170.647	283.683	0.60154
					Adrbk1	294.092	211.121	1.393
					Actl6a	129.446	88.7215	1.45901
					Kpnb1	103.044	178.52	0.577215
					Pcnxl3	139.145	58.6095	2.37411
					4930506M07Rik	321.407	202.121	1.59017
					Rpl27	871.094	1414.93	0.615644
					Apoa1bp	110.605	74.317	1.48828
					Cd300lf	1235.45	603.716	2.04642
					Klf13	465.657	314.341	1.48138
					Ncln	291.674	188.199	1.54982
					Zbtb7a	550.256	373.031	1.4751
					Sdhc	143.051	229.918	0.622181
					Cox5b	146.29	224.687	0.651084
					Gm22710	536.368	220.795	2.42926
					Diap2	254.609	160.404	1.5873
					Cpt1a	177.609	289.534	0.61343
					Tcp1	99.2215	162.766	0.609594
					Pip4k2c	129.26	86.2095	1.49936
					Psma1	103.848	169.532	0.612558
					Rabl6	105.553	64.2618	1.64254
					Crip1	190.854	444.356	0.429508
					Hebp1	190.632	332.228	0.573797
					Slc12a7	121.543	80.6855	1.50638
					Rab8a	353.186	234.053	1.50901
					1810037I17Rik	299.657	600.125	0.499324
					Pik3cd	166.571	99.7103	1.67055
					Gatad2a	124.996	87.409	1.43002
					Pea15a	116.842	77.6538	1.50465
					Syk	554.614	353.507	1.56889
					Stk24	388.366	258.469	1.50257
					Jak2	112.384	59.7275	1.88161
					Ifrd1	965.206	497.192	1.94131
					Cox14	103.073	154.276	0.668108
					Shfm1	740.105	1281.83	0.577381
					Mapkapk3	197.731	128.539	1.53829
					Rpl14	490.28	320.676	1.5289
					Tnfrsf21	231.653	140.975	1.64322
					Uxs1	182.64	116.469	1.56815
					D17Wsu92e	378.502	268.544	1.40946
					Cox7b	283.428	455.24	0.622592
					Ctbp1	221.145	156.06	1.41705
					Cd200r4	70.3155	112.036	0.627617
					Map2k3	268.438	183.068	1.46633
					Ctss	4608.74	8404.72	0.548351
					Vps72	129.037	67.3398	1.91621
					Zfp36	202.57	90.0775	2.24884
					Mgat4b	288.297	201.211	1.43281
					Atf6b	167.546	112.672	1.48702
					Rbms1	548.707	390.71	1.40438
					Dynll1	59.6213	101.496	0.587428
					Rnf7	61.403	108.941	0.563635
					Fn1	566.618	995.266	0.569313
					Rpn2	176.906	271.561	0.65144
					Coro1a	325.871	191.813	1.6989
					Ube2z	162.04	248.038	0.653289
					Yeats4	179.723	126.788	1.41751
					Rbx1	70.8153	112.973	0.626833
					Kmt2e	162.641	116.695	1.39372
					Junb	496.691	230.738	2.15261
					Eif3e	85.811	153.084	0.560549
					Ube2d3	332.213	223.772	1.4846
					Capns1	408.204	293.616	1.39027
					Gcnt2	130.196	210.704	0.617907
					Rpl36	231.287	383.03	0.603835
					Sap30l	102.659	65.4073	1.56954
					Bak1	121.817	85.156	1.43051
					Txn1	1808.15	3087.14	0.585704
					Rnf220	126.828	86.638	1.46388
					Snx5	524.27	339.227	1.54548
					Plaur	152.549	83.5445	1.82596
					Pim3	127.514	73.3893	1.73751
					Prcp	158.71	105.336	1.50671
					Abhd12	1078.97	699.012	1.54356
					Csnk1g2	246.611	172.925	1.42612
					Dnajb11	66.724	116.882	0.570869
					Aff1	105.231	69.0182	1.52468
					Rmnd5a	64.9022	121.716	0.533228
					Ppp3ca	199.295	305.564	0.65222
					Csde1	469.418	332.087	1.41354
					Mpeg1	866.298	1404.45	0.616823
					Gsk3b	154.324	101.886	1.51467
					2510009E07Rik	57.2137	101.169	0.565525
					Rps28	1404.56	2203.22	0.637503
					Ndufa3	226.322	333.253	0.679129
					Jup	215.304	109.32	1.96949
					Slirp	124.899	187.145	0.66739
					Supt6	108.789	71.3102	1.52557
					Ccdc115	218.702	153.524	1.42454
					Fam168b	118.734	177.588	0.668593
					Ccnl1	110.031	67.4378	1.6316
					Gabarap	2105.88	1420.45	1.48255
					Tubb4b	59.2332	100.536	0.589176
					Uqcrfs1	287.255	453.607	0.633268
					Snd1	118.877	82.227	1.44572
					Znfx1	65.1755	101.906	0.639563
					Rps18	356.965	526.714	0.67772
					Cmip	216.38	152.969	1.41453
					Pik3r1	111.552	71.0685	1.56964
					Ndufb5	133.229	205.394	0.648654
					Pafah1b1	221.397	326.743	0.677589
					Tonsl	439.23	305.096	1.43965
					Phb2	325.647	234.051	1.39135
					Brd4	148.79	96.6128	1.54007
					Tapbp	526.427	352.986	1.49135
					Atf5	183.983	105.558	1.74296
					Rsrp1	105.888	196.281	0.539473
					Mapkapk2	854.339	520.654	1.6409
					Pigt	271.427	156.043	1.73943
					Id2	266.579	174.087	1.5313
					Scap	182.36	119.66	1.52398
					Cic	115.311	80.1245	1.43914
					Isg15	288.971	119.329	2.42164
					Cpne5	111.409	65.181	1.70923
					Stk17b	86.7027	141.221	0.61395
					Hpcal1	450.718	277.776	1.62259
					Pbxip1	240.963	162.841	1.47974
					Actn4	250.431	177.768	1.40875
					Cct2	134.402	200.622	0.669929
					Tnfaip2	1528.72	938.758	1.62844
					Ccnd2	1860.31	1013.14	1.83618
					Fam96a	91.893	144.222	0.637164
					Copb2	102.937	71.7043	1.43558
					9130401M01Rik	83.8695	133.103	0.630107
					Rab1	242.9	377.594	0.643282
					Arhgef7	109.993	66.665	1.64993
					Hsp90ab1	1697.95	1021.62	1.66203
					Pex11a	325.763	203.045	1.60439
					Mbnl2	109.286	68.5233	1.59487
					Ap3d1	137.018	206.358	0.663984
					Magt1	85.654	133.549	0.641365
					Fam129a	246.712	151.936	1.62379
					BC031181	99.8815	143.81	0.69454
					Chmp1a	230.286	158.83	1.4499
					Tnip1	275.8	136.693	2.01767
					Tmx1	171.856	243.902	0.70461
					Nr4a1	215.039	70.3642	3.05608
					Cops5	149.804	104.669	1.43122
					AI413582	122.187	82.7495	1.47659
					Mxd1	233.518	66.6553	3.50337
					Tgfbr2	137.444	231.34	0.594118
					Fbxl5	113.835	179.393	0.634557
					Pqlc3	61.761	115.654	0.534015
					Rpl23	980.488	1635.19	0.599617
					Klc1	225.983	144.212	1.56702
					H2-K1	1569.84	1005.34	1.5615
					Psmc1	237.986	156.585	1.51985
					Bsg	268.429	199.52	1.34537
					Rbm17	81.4315	147.119	0.553507
					Ms4a6d	211.407	326.26	0.64797
					Eif5b	269.144	198.039	1.35904
					Tpp2	67.9047	115.733	0.586738
					Hdgf	344.645	239.028	1.44186
					Nucb1	74.154	112.079	0.661621
					Itgax	977.618	631.208	1.5488
					Rpl31	962.326	1536.57	0.626283
					Pfkfb4	172.41	126.002	1.36831
					Actr1b	119.198	81.594	1.46087
					Arl8b	110.824	166.068	0.667341
					Tsc22d4	103.231	69.3533	1.48847
					Naaa	290.851	479.946	0.606009
					Rpl36a	1234.06	2047.15	0.60282
					Fkbp2	144.917	227.007	0.638382
					Zfp703	199.577	118.369	1.68606
					Saraf	326.706	236.792	1.37972
					Vapb	346.01	242.571	1.42643
					Ddb1	568.413	409.919	1.38665
					Mmp8	69.414	141.066	0.492069
					Ndufb3	227.744	380.267	0.598907
					Ear1	1200.25	701.42	1.71118
					Ndufb9	137.862	205.227	0.671754
					Nop58	98.7318	153.018	0.645232
					Elovl1	158.145	110.727	1.42824
					Trib1	192.613	93.1015	2.06885
					Tkt	659.673	427.929	1.54155
					Tnf	100.154	44.8855	2.23132
					Skiv2l	67.175	109.61	0.612853
					Slc7a1	105.091	63.6963	1.64988
					Tardbp	69.624	116.187	0.59924
					Smarcd2	120.585	82.9507	1.45369
					Hyou1	110.123	61.653	1.78618
					Hmox1	144.613	92.33	1.56626
					Atp6v1f	1002.71	697.605	1.43737
					Rpl9	318.808	468.36	0.68069
					Psmb4	237.124	350.53	0.676473
					Rpl13a	690.875	1062.51	0.650229
					Sec22b	113.38	81.8347	1.38547
					Polr2g	68.1825	106.8	0.638416
					Sdf4	189.889	140.328	1.35318
					Rsu1	97.1637	147.202	0.66007
					Cox6b1	635.028	959.323	0.661954
					Pmepa1	195.152	124.531	1.5671
					Polr2a	183.985	135.718	1.35564
					Rnh1	1358.49	963.104	1.41053
					Ccnk	123.507	187.89	0.65734
					Qsox1	937.338	593.054	1.58053
					Nagpa	196.077	143.553	1.36589
					Irf8	136.845	94.2043	1.45264
					Hnrnpl	170	115.993	1.46561
					Grpel1	204.963	134.861	1.51981
					Card11	105.246	74.0393	1.4215
					Adam17	537.158	346.401	1.55068
					Lima1	766.382	482.322	1.58894
					Vcp	303.67	201.746	1.50521
					Srp9	75.3915	135.214	0.55757
					Hsd3b7	127.526	199.363	0.639666
					Ncor2	179.81	119.48	1.50494
					Rpl22l1	75.794	124.903	0.606822
					Mertk	372.732	245.469	1.51845
					C77080	69.336	117.477	0.59021
					Stk10	112.688	196.316	0.574015
					Purb	312.487	227.607	1.37292
					Mtdh	563.66	376.7	1.49631
					Calm2	177.257	264.63	0.669831
					Eif1ax	83.7302	124.85	0.670645
					Sqstm1	718.443	492.596	1.45848
					Swi5	278.007	182.842	1.52048
					Rpl37	1998.91	3192.47	0.626132
					Tpd52l2	73.4335	112.192	0.654534
					Fnta	129.529	185.767	0.697268
					Mapre1	334.756	243.106	1.377
					Stat6	118.912	86.2168	1.37922
					Plek	1440.86	842.166	1.7109
					Isoc2a	389.956	266.521	1.46314
					Slc39a11	151.725	102.372	1.4821
					Chmp2a	200.119	305.707	0.654608
					Sae1	259.555	170.529	1.52206
					Atp6ap1	1032.82	739.854	1.39598
					Emd	195.461	137.938	1.41702
					Mfsd12	230.37	155.506	1.48143
					Pfkfb3	121.651	69.7347	1.74449
					Srp19	71.01	108.787	0.652743
					Nabp1	165.946	270.986	0.612378
					Hck	593.209	377.3	1.57225
					Mpc2	124.069	206.648	0.600384
					Lhfpl2	74.8858	117.014	0.639971
					Rtcb	141.653	106.491	1.33018
					S100a11	526.694	355.828	1.48019
					Tm9sf4	166.801	99.8113	1.67117
					Irf1	175.645	96.873	1.81314
					Actb	13132.1	8168.34	1.60768
					Pim1	345.244	188.928	1.82738
					Atg3	77.5182	120.816	0.641625
					Cux1	102.123	69.7583	1.46395
					Atxn1	157.713	112.208	1.40554
					Rrs1	67.8377	124.041	0.546898
					P2ry14	408.208	276.199	1.47795
					Itpr2	208.002	146.86	1.41633
					Nfkb2	108.002	61.904	1.74466
					Cbfb	115.107	168.185	0.684406
					Bcl2a1d	171.973	348.869	0.492944
					Anp32a	156.504	98.0652	1.59591
					Naca	150.72	249.178	0.604869
					Rpl3	769.672	1135.6	0.677769
					Higd2a	136.042	103.348	1.31635
					Taok1	149.71	107.556	1.39193
					Crlf2	302.333	231.664	1.30505
					Atp6v1e1	520.16	383.972	1.35468
					Batf	108.378	70.3402	1.54077
					Tnfrsf1b	243.474	156.392	1.55682
					Rab5c	2786.89	1879.19	1.48303
					Mgst1	186.462	296.938	0.627951
					Hsbp1	108.52	163.421	0.664055
					Acaa1a	199.452	149.602	1.33322
					Lamtor1	288.989	187.481	1.54143
					43723	117.525	193.165	0.608416
					Sumo3	320.005	227.206	1.40844
					Gtf2h5	120.656	173.722	0.694534
					Tuba1c	561.35	387.354	1.44919
					Cotl1	4070.33	2796.34	1.45559
					Rps7	415.427	626.109	0.663506
					Snrpb2	160.268	117.006	1.36974
					Lrp10	173.302	123.77	1.40019
					St13	299.835	226.228	1.32537
					Sec11a	97.3817	141.365	0.688865
					Rps29	1772.04	1236.54	1.43306
					Pebp1	91.1192	132.844	0.685913
					Myl12b	259.955	185.209	1.40357
					Sidt2	125.326	94.0933	1.33194
					Ergic1	150.084	108.459	1.38379
					Rpl18	225.567	323.747	0.69674
					Tnfaip8	152.778	108.504	1.40804
					Ndufb10	100.837	155.438	0.64873
					Ifitm2	130.598	56.3528	2.31751
					Cox7c	225.274	319.103	0.705959
					Rplp0	704.875	1022.74	0.689202
					Rplp2	993.263	1451.28	0.684403
					Fam49b	316.121	220.394	1.43435
					Itpripl2	316.854	230.321	1.37571
					Psmb5	161.65	225.005	0.718428
					Gba	126.009	181.66	0.693656
					Gab2	262.672	178.617	1.47059
					Gar1	73.5457	114.211	0.643946
					Esrra	81.7627	119.431	0.684602
					Ddost	176.872	133.481	1.32507
					Zfp770	14.7745	7.835	1.88571
					Usp14	139.339	105.662	1.31872
					Eif4b	104.297	149.428	0.697975
					Ndufa6	214.606	307.828	0.69716
					Hvcn1	246.763	361.71	0.682213
					Mbnl1	255.685	192.972	1.32498
					Ehbp1l1	152.985	115.097	1.32918
					H2-DMb1	695.379	481.517	1.44414
					Bhlhe40	134.375	90.1515	1.49055
					Actr10	145.373	112.326	1.2942
					Arl2bp	99.1532	169.349	0.585498
					Gas5	236.435	347.968	0.679474
					Pgrmc2	117.022	84.8245	1.37958
					Abhd16a	127.401	92.4903	1.37745
					Tyrobp	1656.32	2449.06	0.676309
					Chtf8	202.05	125.801	1.60611
					Cdc42ep3	98.8893	166.85	0.592685
					Mgat1	225.685	176.601	1.27794
					Ufd1l	104.358	80.2295	1.30074
					Ddx50	66.806	102.05	0.654638
					Atp6v0a1	133.051	92.0433	1.44553
					Mob1a	184.415	288.951	0.638222
					Mdm2	134.821	96.5247	1.39675
					Atp6ap2	649.543	490.394	1.32453
					Gpcpd1	184.247	299.127	0.615949
					Hsd17b4	91.7097	142.918	0.641696
					H2-Eb1	810.211	445.362	1.81922
					Col4a3bp	90.2825	127.375	0.708796
					Psmd6	78.2668	112.242	0.697302
					Stx6	137.982	105.757	1.30472
					Arhgap1	106.237	74.986	1.41675
					Sp1	137.627	102.475	1.34303
					Snrnp70	329.282	459.4	0.716766
					Ddx6	485.125	349.065	1.38979
					Ubb	284.471	210.377	1.3522
					Fam32a	119.474	80.4485	1.4851
					Coro1c	700.299	1025.91	0.682615
					Gp49a	177.939	111.163	1.60069
					Higd1a	97.3482	136.446	0.713455
					Sec61a1	650.218	477.41	1.36197
					Ppig	121.973	86.1172	1.41636
					Atp10a	141.138	99.1905	1.4229
					Ythdf3	101.323	75.049	1.35009
					Pdcd6	77.6308	115.704	0.670943
					Hdc	373.147	74.67	4.99727
					Acads	209.739	158.501	1.32327
					Rab31	124.199	93.5695	1.32734
					Jak1	264.956	203.226	1.30375
					Csf1r	370.984	253.803	1.4617
					Wipf1	97.869	132.978	0.735976
					Ndufc2	132.494	188.688	0.702184
					Smdt1	167.662	234.452	0.715126
					Edf1	182.304	132.025	1.38082
					Soat1	72.0508	102.439	0.703351
					Ier3	728.099	262.386	2.77491
					Mgrn1	112.565	86.2608	1.30494
					Ccl9	1044.24	520.549	2.00603
					Marco	1334.49	2384.62	0.559625
					Rps24	2695.03	1821.55	1.47952
					Ube2j2	124.118	95.4897	1.29981
					Pcbp1	190.016	258.006	0.73648
					Ssbp4	147.496	104.183	1.41574
					Zranb2	75.8265	107.025	0.708493
					2310036O22Rik	160.476	121.184	1.32423
					Hspa4	188.404	283.267	0.665109
					Vav1	166.212	229.004	0.725808
					Rnf13	70.312	107.936	0.651422
					Eef2	2514.79	1797.83	1.39879
					Rpl12	334.596	468.552	0.714106
					Kdelr2	68.8417	102.008	0.674865
					Tmem189	69.55	103.614	0.671238
					Anxa4	340.292	259.685	1.3104
					Fth1	11275.4	19108.9	0.590063
					Ewsr1	107.425	167.154	0.642667
					Snrpf	78.4555	140.78	0.557292
					Emc7	122.767	186.745	0.657401
					Ncor1	152.204	107.189	1.41997
					Dstn	264.475	180.534	1.46495
					Fas	252.566	140.337	1.79971
					Canx	339.544	463.361	0.732785
					Per1	202.036	116.518	1.73394
					Bub1b	165.379	113.238	1.46045
					Tmem109	129.69	99.5855	1.30229
					Rps20	1944.48	1409.43	1.37962
					Sptlc2	116.305	160.726	0.723622
					Tmbim6	1200.64	879.357	1.36536
					Hexa	505.064	721.332	0.700183
					Cwc15	255.088	196.041	1.30119
					Hnrnpa0	617.525	477.754	1.29256
					Abcf1	129.946	101.331	1.2824
					Zfp706	111.411	153.697	0.724873
					Bud31	103.642	77.4537	1.33811
					Ankrd11	158.858	109.338	1.45291
					Atp5c1	76.223	109.769	0.694393
					Ccdc88a	260.093	179.576	1.44837
					Wbp11	68.7905	100.687	0.683211
					Cd24a	141.741	229.755	0.616924
					Nampt	432.411	304.702	1.41913
					Hsd17b11	277.601	399.691	0.694539
					Aamp	282.631	215.803	1.30967
					Mllt6	190.865	114.694	1.66412
					Hnrnpul2	221.794	160.687	1.38029
					Creg1	580.703	441.134	1.31639
					Pa2g4	192.208	148.03	1.29844
					Tcirg1	151.62	213.677	0.709577
					Arpc5l	88.3065	119.551	0.738651
					2010107E04Rik	354.817	494.616	0.717359
					B4galnt1	132.184	182.45	0.724496
					Man2a1	99.2185	153.1	0.648062
					Dynlt3	117.459	89.4675	1.31287
					Trem1	375.303	197.374	1.90149
					Nfe2l2	137.114	108.048	1.26901
					Adam15	146.558	104.953	1.39642
					Mfsd7c	97.6232	150.269	0.649658
					Cib2	106.178	71.385	1.4874
					Prdx2	118.269	159.062	0.743541
					Tmcc3	145.475	113.821	1.2781
					Malsu1	80.6808	124.057	0.650351
					Dock10	258.875	189.283	1.36766
					Fermt3	126.305	93.3985	1.35233
					Arhgap30	183.503	138.558	1.32438
					E430025E21Rik	85.0285	118.217	0.719258
					Ddx21	246.834	178.385	1.38371
					Srsf7	82.3923	113.839	0.723764
					Ppt2	123.085	163.888	0.751035
					Qdpr	144.287	199.573	0.722979
					Cox7a2l	107.678	77.3247	1.39254
					Clec5a	98.7338	151.427	0.652024
					Nckap1l	232.208	181.252	1.28113
					Srsf3	185.111	258.962	0.714819
					Slc7a2	1482.48	966.836	1.53334
					Fau	712.713	962.464	0.740509
					Pld3	953.688	717.668	1.32887
					H2-Ab1	1750.08	1066.05	1.64165
					Rock1	175.232	138.294	1.2671
					Tmem86a	204.806	155.817	1.3144
					Far1	96.9385	135.397	0.715958
					Sdha	157.129	212.793	0.738412
					Pkm	569.259	448.851	1.26826
					Lgals3bp	177.819	259.866	0.684273
					Sub1	235.004	305.964	0.768076
					Cybb	2186.9	1600.81	1.36612
					Cers2	206.119	158.225	1.3027
					Grn	910.191	675.668	1.3471
					Fgr	403.207	292.225	1.37978
					Zcchc2	79.0035	113.797	0.694246
					Picalm	837.72	638.201	1.31263
					Ufsp2	112.623	155.739	0.723148
					Arhgdia	402.255	316.787	1.2698
					Cct8	217.688	293.285	0.74224
					Ddx3x	385.718	281.781	1.36886
					Hdlbp	148.744	112.331	1.32416

## Sheet: 1A3 F vs KO F
1A3-Females					KO-Females					common genes between 1A3 vs KO
	average	average	fold			average	average	fold		1A3 Female					KO Female
Associated_Gene_Name	male	Female	f/m		Associated_Gene_Name	male	Female	f/m		Associated_Gene_Name	male	Female	f/m		Associated_Gene_Name	male	Female	f/m				1A3 Male	1A3 Female	KO male	KO Female
Xist	788.545	1075.06	1.36335		Xist	526.585	523.463	0.994071		Xist	788.545	1075.06	1.36335		Xist	526.585	523.463	0.994071			Xist	0.733489	1.36335	0.994071	1.00596
Mfge8	29.7752	627.277	21.0671		Rpl36al	214.576	809.139	3.77088		Zfp36	89.9068	447.543	4.97786		Zfp36	202.57	90.0775	0.444673			Zfp36	0.20089	4.97786	0.444673	2.24884
Agpat1	42.2325	116.626	2.76151		Cd302	544.712	202.431	0.37163		Tmx1	192.19	127.505	0.663432		Tmx1	171.856	243.902	1.41922			Tmx1	1.50731	0.663432	1.41922	0.70461
Zfp36	89.9068	447.543	4.97786		Uqcc2	36.571	137.463	3.7588		Spp1	53.2658	160.678	3.01653		Spp1	53.8835	208.334	3.86637			Spp1	0.331507	3.01653	3.86637	0.258641
Trem2	30.6412	100.475	3.27906		Ralgds	1028.44	327.018	0.317975		Cox7a2l	77.3483	164.557	2.12748		Cox7a2l	107.678	77.3247	0.718111			Cox7a2l	0.47004	2.12748	0.718111	1.39254
Mmp12	6.08475	328.624	54.0078		Abhd17c	290.729	121.753	0.418785		Bhlhe40	82.9235	187.947	2.2665		Bhlhe40	134.375	90.1515	0.670895			Bhlhe40	0.441208	2.2665	0.670895	1.49055
Tap1	37.4625	113.152	3.0204		Icosl	176.678	37.6485	0.213092		Herpud1	151.73	288.232	1.89964		Herpud1	233.39	125.918	0.539518			Herpud1	0.526415	1.89964	0.539518	1.85351
Bpgm	170.264	28.9962	0.170302		E130309D02Rik	187.056	68.2278	0.364746		Mmp8	42.9562	126.708	2.9497		Mmp8	69.414	141.066	2.03223			Mmp8	0.339018	2.9497	2.03223	0.492069
Plxnd1	61.521	157.115	2.55385		Lrrk1	104.952	39.5115	0.376474		Rpl36	185.954	108.534	0.58366		Rpl36	231.287	383.03	1.65608			Rpl36	1.71333	0.58366	1.65608	0.603835
Manf	150.504	378.147	2.51253		Rps11	656.696	2443.06	3.72022		2310036O22Rik	178.597	321.485	1.80006		2310036O22Rik	160.476	121.184	0.755154			2310036O22Rik	0.555536	1.80006	0.755154	1.32423
AA467197	66.971	523.491	7.81668		Rpl28	486.17	1293.41	2.6604		Rpl38-ps2	109.275	74.5498	0.682223		Rpl38-ps2	135.515	241.07	1.77892			Rpl38-ps2	1.4658	0.682223	1.77892	0.562139
Kdm5c	52.9733	106.303	2.00673		Gm10320	91.9943	256.604	2.78935		Snw1	239.923	162.819	0.67863		Snw1	248.592	134.339	0.540402			Snw1	1.47356	0.67863	0.540402	1.85047
Tmx1	192.19	127.505	0.663432		Sh3tc1	965.94	334.062	0.345841		Spryd3	141.352	96.013	0.679249		Spryd3	166.856	103.035	0.617505			Spryd3	1.47221	0.679249	0.617505	1.61942
Lgmn	39.3695	108.172	2.74762		Rps6	43.5205	153.635	3.53018		Phf1	72.4078	148.935	2.05689		Phf1	103.917	41.2022	0.396493			Phf1	0.48617	2.05689	0.396493	2.52211
Angptl4	204.242	96.839	0.47414		mt-Co1	552.17	1522.47	2.75725		Rab5c	3147.76	1941.66	0.616838		Rab5c	2786.89	1879.19	0.674296			Rab5c	1.62117	0.616838	0.674296	1.48303
Spp1	53.2658	160.678	3.01653		Atpif1	296.411	705.594	2.38046		Mfsd7c	170.133	99.848	0.586882		Mfsd7c	97.6232	150.269	1.53927			Mfsd7c	1.70392	0.586882	1.53927	0.649658
Ldlr	126.979	270.607	2.13112		Atp5j	305.241	993.511	3.25484		Pa2g4	241.184	173.772	0.720496		Pa2g4	192.208	148.03	0.770156			Pa2g4	1.38793	0.720496	0.770156	1.29844
S100a1	319.43	656.503	2.05523		Eef1a1	195.919	511.532	2.61094		Rnf10	497.728	312.154	0.627158		Rnf10	387.003	208.84	0.539636			Rnf10	1.59449	0.627158	0.539636	1.8531
Cox7a2l	77.3483	164.557	2.12748		Serf2	93.1025	217.567	2.33685		Hist1h1c	83.016	170.605	2.05508		Hist1h1c	117.433	327.603	2.7897			Hist1h1c	0.486598	2.05508	2.7897	0.358462
Gpnmb	854.082	1650.35	1.93231		Cav2	223.459	87.74	0.392644		Psma3	103.573	70.3907	0.679621		Psma3	96.852	193.922	2.00225			Psma3	1.47141	0.679621	2.00225	0.499437
Nars	170.495	110.434	0.647722		Rpl35	391.389	1096.22	2.80085		Prpf19	126.2	90.568	0.717653		Prpf19	101.828	167.939	1.64925			Prpf19	1.39343	0.717653	1.64925	0.606335
Bhlhe40	82.9235	187.947	2.2665		Hspe1	239.666	715.095	2.98371		Cmip	161.992	260.527	1.60827		Cmip	216.38	152.969	0.706947			Cmip	0.621787	1.60827	0.706947	1.41453
Fam220a	132.891	39.1833	0.294852		Prkag1	253.341	115.266	0.454984		Spen	110.062	77.7125	0.706081		Spen	110.799	63.0722	0.569249			Spen	1.41627	0.706081	0.569249	1.7567
Lipf	138.55	25.7115	0.185576		Atp5h	160.732	413.785	2.57439		Mpc2	154.08	93.0302	0.603779		Mpc2	124.069	206.648	1.6656			Mpc2	1.65624	0.603779	1.6656	0.600384
Hba-a1	13144.8	942.052	0.0716671		Rassf1	132.277	55.227	0.41751		Slirp	130.019	95.4675	0.734255		Slirp	124.899	187.145	1.49837			Slirp	1.36192	0.734255	1.49837	0.66739
Foxk1	69.759	144.019	2.06452		Dnajc19	34.4145	115.993	3.37048		Cd274	77.7313	171.463	2.20585		Cd274	177.192	83.7225	0.472496			Cd274	0.453341	2.20585	0.472496	2.11642
Herpud1	151.73	288.232	1.89964		Pabpc4	232.262	85.5362	0.368274		Pcbp1	222.356	166.229	0.747582		Pcbp1	190.016	258.006	1.35781			Pcbp1	1.33765	0.747582	1.35781	0.73648
C3	110.783	264.017	2.38319		Cox7a2	347.224	885.24	2.54948		Cd300lf	758.102	1678.77	2.21444		Cd300lf	1235.45	603.716	0.488659			Cd300lf	0.451582	2.21444	0.488659	2.04642
Il11ra1	74.958	165.258	2.20467		Rpl10	232.431	864.526	3.71949		Ier3	95.0555	440.169	4.63066		Ier3	728.099	262.386	0.360372			Ier3	0.215952	4.63066	0.360372	2.77491
Lrg1	30.5647	211.008	6.90365		Ptbp1	192.455	97.6903	0.5076		Ncor2	154.512	101.028	0.653851		Ncor2	179.81	119.48	0.664477			Ncor2	1.5294	0.653851	0.664477	1.50494
Rnase2a	1.4085	152.51	108.278		Spi1	1414.95	604.172	0.426991		H2-K1	1241.67	2258.03	1.81855		H2-K1	1569.84	1005.34	0.640411			H2-K1	0.54989	1.81855	0.640411	1.5615
Hba-a2	9315.65	719.827	0.0772708		Ube2j1	263.638	125.906	0.477573		E430025E21Rik	109.435	76.6797	0.700689		E430025E21Rik	85.0285	118.217	1.39032			E430025E21Rik	1.42717	0.700689	1.39032	0.719258
Dpp3	135.225	90.9273	0.672416		Gm2962	37.176	150.105	4.03769		Fnta	165.013	123.527	0.748587		Fnta	129.529	185.767	1.43417			Fnta	1.33585	0.748587	1.43417	0.697268
Mmp8	42.9562	126.708	2.9497		Zc3h12a	251.18	81.7322	0.325393		Hnrnpa0	555.914	417.796	0.751547		Hnrnpa0	617.525	477.754	0.773659			Hnrnpa0	1.33059	0.751547	0.773659	1.29256
Rpl36	185.954	108.534	0.58366		Myh9	692.495	332.638	0.480347		Marco	1073.76	2358.97	2.19692		Marco	1334.49	2384.62	1.78691			Marco	0.455183	2.19692	1.78691	0.559625
Ccl17	44.0175	220.125	5.00085		Anapc13	65.7005	162.507	2.47344		Stx16	101.501	74.2858	0.731872		Stx16	69.8425	124.049	1.77613			Stx16	1.36636	0.731872	1.77613	0.563022
Marcks	25.1013	178.102	7.09534		Hcar2	532.829	126.393	0.237211		Dhx9	221.274	146.638	0.6627		Dhx9	225.607	505.343	2.23992			Dhx9	1.50898	0.6627	2.23992	0.446444
Gins2	104.465	61.6665	0.590311		Ndufa5	317.129	725.609	2.28806		Nmt1	232.515	170.048	0.731339		Nmt1	215.114	133.972	0.622795			Nmt1	1.36735	0.731339	0.622795	1.60567
Hbb-bs	46650.7	3655.26	0.0783538		Asap1	208.494	104.987	0.50355		Fbxl5	99.2368	170.671	1.71984		Fbxl5	113.835	179.393	1.5759			Fbxl5	0.581451	1.71984	1.5759	0.634557
Aprt	330.608	231.024	0.698785		Usmg5	287.705	768.689	2.67179		Gp49a	69.7635	141.064	2.02202		Gp49a	177.939	111.163	0.62473			Gp49a	0.494554	2.02202	0.62473	1.60069
2310036O22Rik	178.597	321.485	1.80006		Rara	108.311	41.2897	0.381214		Nr4a1	63.6255	223.499	3.51272		Nr4a1	215.039	70.3642	0.327217			Nr4a1	0.28468	3.51272	0.327217	3.05608
Glg1	243.889	157.425	0.645477		Rps13-ps2	225.782	98.357	0.435628		Fabp4	270.813	495.63	1.83016		Fabp4	414.801	824.474	1.98764			Fabp4	0.546402	1.83016	1.98764	0.503109
Gdf15	78.4617	214.124	2.72902		Cnot1	187.475	72.9095	0.388902		Ets2	49.3503	136.163	2.75912		Ets2	209.028	70.0675	0.335206			Ets2	0.362434	2.75912	0.335206	2.98324
Mcm3	125.595	72.0913	0.573997		Hmgcl	1052.06	364.734	0.346685		Irf1	126.637	262.552	2.07325		Irf1	175.645	96.873	0.551528			Irf1	0.482333	2.07325	0.551528	1.81314
Mkrn1	255.694	137.155	0.536402		Zdhhc9	110.914	47.567	0.428862		Ddx24	204.685	139.18	0.67997		Ddx24	250.138	143.72	0.574563			Ddx24	1.47065	0.67997	0.574563	1.74045
Myl6	498.7	321.693	0.645064		Gm10288	111.355	53.0117	0.47606		Fnip1	70.336	120.113	1.70771		Fnip1	117.463	61.3012	0.521875			Fnip1	0.585581	1.70771	0.521875	1.91617
Ybx1	186.633	396.106	2.12238		Ndufb6	115.281	282.3	2.4488		Ear1	1725.72	1062.04	0.61542		Ear1	1200.25	701.42	0.584393			Ear1	1.62491	0.61542	0.584393	1.71118
Tmem216	155.115	95.5675	0.616107		Trf	1922.07	831.48	0.432597		Ssbp4	151.918	252.948	1.66503		Ssbp4	147.496	104.183	0.706346			Ssbp4	0.60059	1.66503	0.706346	1.41574
Cd93	38.278	121.77	3.18121		Sec61b	216.829	514.889	2.37463		Eif5b	280.799	219.495	0.78168		Eif5b	269.144	198.039	0.735811			Eif5b	1.2793	0.78168	0.735811	1.35904
Serp1	241.579	415.224	1.71879		Snrpd2	64.6552	145.319	2.24759		Unc119	343.548	260.511	0.758298		Unc119	322.051	212.856	0.66094			Unc119	1.31874	0.758298	0.66094	1.513
Cdk11b	63.758	117.765	1.84706		Rpl5	180.957	458.008	2.53103		Tap2	224.452	450.173	2.00566		Tap2	276.924	108.946	0.393415			Tap2	0.498589	2.00566	0.393415	2.54185
Fam46c	116.129	21.2907	0.183336		Triap1	243.108	115.557	0.475333		Rpl35	327.577	229.514	0.700641		Rpl35	391.389	1096.22	2.80085			Rpl35	1.42726	0.700641	2.80085	0.357034
Rilpl2	52	117.771	2.26482		Spp1	53.8835	208.334	3.86637		Rpl14	402.966	643.249	1.59628		Rpl14	490.28	320.676	0.654067			Rpl14	0.626455	1.59628	0.654067	1.5289
Xdh	52.908	111.557	2.10851		Cd82	416.953	175.609	0.421172		Soat1	86.9657	137.353	1.5794		Soat1	72.0508	102.439	1.42177			Soat1	0.633153	1.5794	1.42177	0.703351
Clec4b1	123.127	70.6895	0.574117		Fmnl1	135.849	62.9285	0.463225		Cybb	1461.1	2414.01	1.65219		Cybb	2186.9	1600.81	0.732001			Cybb	0.605258	1.65219	0.732001	1.36612
Wfdc17	52.2218	192.075	3.67807		Rpl10a	64.3173	162.66	2.52903		Rnf6	110.626	74.515	0.673579		Rnf6	124.893	68.9898	0.552392			Rnf6	1.48461	0.673579	0.552392	1.81031
Fam89a	187.211	105.703	0.564619		Myeov2	289.405	604.954	2.09034		Atf4	224.644	377.082	1.67858		Atf4	352.309	185.392	0.52622			Atf4	0.595743	1.67858	0.52622	1.90035
Igf1	37.096	108.822	2.93351		Furin	1077.79	470.467	0.436512		Junb	132.399	286.716	2.16554		Junb	496.691	230.738	0.464551			Junb	0.461778	2.16554	0.464551	2.15261
Clec7a	741.275	1640.34	2.21286		Rpl30	1045	2915.26	2.78972		Pfkfb4	184.394	144.34	0.78278		Pfkfb4	172.41	126.002	0.730827			Pfkfb4	1.2775	0.78278	0.730827	1.36831
Cd63	1081.8	2640.04	2.44041		Ndufv3	129.921	268.712	2.06828		Rpl28	432.112	315.26	0.72958		Rpl28	486.17	1293.41	2.6604			Rpl28	1.37065	0.72958	2.6604	0.375883
Rpl38-ps2	109.275	74.5498	0.682223		Plekho2	561.736	151.288	0.269323		Coro1c	703.977	517.384	0.734944		Coro1c	700.299	1025.91	1.46495			Coro1c	1.36065	0.734944	1.46495	0.682615
Snw1	239.923	162.819	0.67863		Rpl35a	255.669	623.444	2.43848		R3hdm4	125.25	216.394	1.72771		R3hdm4	123.149	58.9228	0.478466			R3hdm4	0.578802	1.72771	0.478466	2.09001
Cluh	128.989	91.8632	0.712179		Minos1	174.699	351.509	2.01209		Mtdh	285.483	203.667	0.713413		Mtdh	563.66	376.7	0.66831			Mtdh	1.40171	0.713413	0.66831	1.49631
Osm	25.161	129.801	5.15884		Prrc2a	103.276	39.1362	0.378948		Atp6v1e1	348.576	530.703	1.52249		Atp6v1e1	520.16	383.972	0.73818			Atp6v1e1	0.656819	1.52249	0.73818	1.35468
Yipf1	84.4137	142.338	1.68619		Srebf2	231.108	109.807	0.475131		Rpl36al	208.488	149.541	0.717262		Rpl36al	214.576	809.139	3.77088			Rpl36al	1.39419	0.717262	3.77088	0.26519
Spryd3	141.352	96.013	0.679249		Rhoa	4520.69	1591.27	0.351998		Arpc5l	123.073	96.6538	0.785337		Arpc5l	88.3065	119.551	1.35382			Arpc5l	1.27334	0.785337	1.35382	0.738651
Cfp	59.7505	112.418	1.88146		Gm11598	32.4413	103.876	3.20197		Grina	325.745	542.865	1.66653		Grina	436.921	211.041	0.48302			Grina	0.600048	1.66653	0.48302	2.07031
Psme3	135.856	93.3298	0.686976		Kif1c	141.161	77.275	0.547424		Arl8b	111.383	173.287	1.55578		Arl8b	110.824	166.068	1.49849			Arl8b	0.642764	1.55578	1.49849	0.667341
Cenpb	259.829	176.813	0.680495		Snap29	95.3197	211.871	2.22274		Uhmk1	107.406	168.471	1.56854		Uhmk1	94.761	158.456	1.67216			Uhmk1	0.637534	1.56854	1.67216	0.598028
Ppm1g	189.495	128.445	0.677824		Fabp5	95.0532	272.151	2.86314		Rps16	453.844	348.418	0.767703		Rps16	614.465	1117.22	1.8182			Rps16	1.30259	0.767703	1.8182	0.549996
Phf1	72.4078	148.935	2.05689		Jag1	117.469	38.3177	0.326194		Rps23	201.248	152.639	0.758466		Rps23	265.25	561.861	2.11823			Rps23	1.31845	0.758466	2.11823	0.472093
Rab5c	3147.76	1941.66	0.616838		Arl6ip5	427.56	165.727	0.387611		Cers2	195.286	293.968	1.50532		Cers2	206.119	158.225	0.767638			Cers2	0.664312	1.50532	0.767638	1.3027
Eci2	161.331	110.165	0.682852		Hist1h1c	117.433	327.603	2.7897		Abhd17c	127.31	191.919	1.50749		Abhd17c	290.729	121.753	0.418785			Abhd17c	0.663353	1.50749	0.418785	2.38786
Slc7a11	52.6385	191.387	3.63587		Ptk2b	230.796	109.852	0.475971		Ear2	559.333	380.727	0.68068		Ear2	403.867	804.343	1.9916			Ear2	1.46912	0.68068	1.9916	0.502109
Mfsd7c	170.133	99.848	0.586882		Ing1	110.653	44.4495	0.401702		Klf13	400.89	314.488	0.784474		Klf13	465.657	314.341	0.675048			Klf13	1.27474	0.784474	0.675048	1.48138
Pa2g4	241.184	173.772	0.720496		Scand1	104.614	58.7355	0.561451		Rtfdc1	124.785	191.275	1.53283		Rtfdc1	145.632	88.8345	0.609993			Rtfdc1	0.652387	1.53283	0.609993	1.63936
Rnf10	497.728	312.154	0.627158		Hivep3	716.571	240.246	0.335271		Fam96a	107.363	81.3372	0.757589		Fam96a	91.893	144.222	1.56946			Fam96a	1.31998	0.757589	1.56946	0.637164
Tsc22d3	123.26	285.433	2.31571		Rps15	279.725	566.33	2.0246		Ctsl	233.036	390.032	1.6737		Ctsl	241.813	466.905	1.93085			Ctsl	0.59748	1.6737	1.93085	0.517907
Ctsz	1258.12	2241.49	1.78162		Prmt1	219.658	91.0588	0.414547		Fam168b	129.664	102.497	0.79048		Fam168b	118.734	177.588	1.49568			Fam168b	1.26505	0.79048	1.49568	0.668593
Hist1h1c	83.016	170.605	2.05508		Polr2f	116.294	245.512	2.11112		Tyrobp	1593.86	1172.69	0.735756		Tyrobp	1656.32	2449.06	1.47861			Tyrobp	1.35915	0.735756	1.47861	0.676309
Gal	145.519	82.2825	0.565441		Memo1	38.8188	123.337	3.17725		Plaur	75.297	137.309	1.82356		Plaur	152.549	83.5445	0.547657			Plaur	0.548378	1.82356	0.547657	1.82596
Jund	84.0595	146.586	1.74383		Lypla2	421.818	227.636	0.539655		Tcirg1	106.478	165.463	1.55395		Tcirg1	151.62	213.677	1.40929			Tcirg1	0.643519	1.55395	1.40929	0.709577
Atp6v0d1	242.153	404.684	1.67119		Dync1i2	306.826	161.435	0.526144		Ccnl1	73.3773	121.082	1.65012		Ccnl1	110.031	67.4378	0.612895			Ccnl1	0.606015	1.65012	0.612895	1.6316
Tppp3	227.783	127.219	0.558509		Mfsd5	276.681	147.381	0.532676		Sdhc	164.832	126.625	0.76821		Sdhc	143.051	229.918	1.60725			Sdhc	1.30173	0.76821	1.60725	0.622181
Fcgr4	156.761	288.559	1.84076		Ola1	79.0653	162.665	2.05735		Stom	118.013	176.981	1.49967		Stom	112.219	69.7493	0.621547			Stom	0.666814	1.49967	0.621547	1.60889
Gga1	87.7083	149.023	1.69908		Ndufs5	29.1978	104.016	3.56247		Gla	98.3438	151.257	1.53805		Gla	107.768	55.996	0.519595			Gla	0.650175	1.53805	0.519595	1.92457
Rbm47	86.3468	155.959	1.80619		Rps23	265.25	561.861	2.11823		Card11	165.977	127.448	0.767869		Card11	105.246	74.0393	0.703484			Card11	1.30231	0.767869	0.703484	1.4215
B2m	1495.16	2789.68	1.86581		Iqsec1	355.526	180.716	0.508307		Pip5k1a	106.017	76.7678	0.724106		Pip5k1a	136.461	67.6252	0.495564			Pip5k1a	1.38101	0.724106	0.495564	2.0179
Dgat1	88.4432	207.087	2.34146		Rps3a1	169.881	390.286	2.2974		Fus	1560.6	1088.61	0.697559		Fus	2409.7	1166.51	0.48409			Fus	1.43357	0.697559	0.48409	2.06573
Lsr	266.458	159.814	0.599771		Rps27l	117.737	257.883	2.19033		Vapb	385.75	299.845	0.777305		Vapb	346.01	242.571	0.701051			Vapb	1.2865	0.777305	0.701051	1.42643
Sgk1	318.806	591.934	1.85672		Ap2b1	129.901	60.0345	0.462156		Tuba1c	429.511	322.931	0.751857		Tuba1c	561.35	387.354	0.690041			Tuba1c	1.33004	0.751857	0.690041	1.44919
Psma3	103.573	70.3907	0.679621		Ube2h	133.749	70.0012	0.52338		Sec63	126.159	183.995	1.45845		Sec63	165.969	108.218	0.652041			Sec63	0.685662	1.45845	0.652041	1.53364
Prpf19	126.2	90.568	0.717653		Mir142hg	123.093	46.5862	0.378462		Gde1	87.7772	130.592	1.48776		Gde1	180.897	111.672	0.617325			Gde1	0.67215	1.48776	0.617325	1.61989
Mgll	379.897	675.395	1.77784		Phf1	103.917	41.2022	0.396493		Nagpa	260.472	211.065	0.810315		Nagpa	196.077	143.553	0.732123			Nagpa	1.23409	0.810315	0.732123	1.36589
E2f1	170.005	111.814	0.65771		Fxr2	183.826	98.7947	0.537436		Hcar2	189.137	370.668	1.95978		Hcar2	532.829	126.393	0.237211			Hcar2	0.51026	1.95978	0.237211	4.21565
Atic	263.455	158.51	0.601661		Dst	189.833	86.9935	0.458263		Hmox1	160.218	255.739	1.59619		Hmox1	144.613	92.33	0.638465			Hmox1	0.626491	1.59619	0.638465	1.56626
Cmip	161.992	260.527	1.60827		Got2	179.951	95.8208	0.532481		Ddx21	189.624	139.531	0.735834		Ddx21	246.834	178.385	0.722696			Ddx21	1.359	0.735834	0.722696	1.38371
Sat1	80.1613	161.7	2.01718		Sec61g	70.1815	180.695	2.57468		Nampt	194.489	318.564	1.63795		Nampt	432.411	304.702	0.704657			Nampt	0.610518	1.63795	0.704657	1.41913
Dctn3	177.369	129.21	0.728484		Tmem11	159.334	87.5312	0.549357		Pim1	106.148	200.588	1.88971		Pim1	345.244	188.928	0.547232			Pim1	0.529183	1.88971	0.547232	1.82738
Spen	110.062	77.7125	0.706081		Snw1	248.592	134.339	0.540402		Hsd17b11	264.792	200.923	0.758795		Hsd17b11	277.601	399.691	1.4398			Hsd17b11	1.31788	0.758795	1.4398	0.694539
Mpc2	154.08	93.0302	0.603779		Aup1	138.341	62.504	0.451812		Ctsk	770.47	1373.86	1.78314		Ctsk	769.175	1601.02	2.08147			Ctsk	0.560808	1.78314	2.08147	0.480429
Il1b	96.2858	518.218	5.38209		Rae1	113.97	61.1337	0.536404		Cbfb	137.765	109.034	0.791451		Cbfb	115.107	168.185	1.46112			Cbfb	1.2635	0.791451	1.46112	0.684406
Mrpl4	120.099	83.6928	0.696866		B4galt1	1088.14	555.501	0.510504		Axl	816.289	643.693	0.78856		Axl	804.608	535.335	0.665337			Axl	1.26813	0.78856	0.665337	1.503
Fam134a	147.842	230.878	1.56166		Rnf19b	153.302	54.2625	0.353958		Pdia6	254.591	361.933	1.42163		Pdia6	224.986	350.409	1.55747			Pdia6	0.703419	1.42163	1.55747	0.642067
Lpl	3597.63	2241.7	0.623106		Stt3a	65.3307	127.197	1.94697		Srebf2	164.369	246.589	1.50022		Srebf2	231.108	109.807	0.475131			Srebf2	0.666569	1.50022	0.475131	2.10468
Slirp	130.019	95.4675	0.734255		Lfng	103.269	56.1333	0.543563		Lhfpl2	96.2575	148.998	1.54791		Lhfpl2	74.8858	117.014	1.56257			Lhfpl2	0.646032	1.54791	1.56257	0.639971
Alas2	937.718	146.436	0.156162		Rhoc	721.574	376.248	0.521426		Mgat4b	286.105	231.938	0.810675		Mgat4b	288.297	201.211	0.697929			Mgat4b	1.23354	0.810675	0.697929	1.43281
43531	55.1762	100.597	1.8232		Bst1	323.638	678.261	2.09574		Pltp	145.305	96.1755	0.661889		Pltp	105.527	54.6453	0.517833			Pltp	1.51083	0.661889	0.517833	1.93112
Acp5	173.86	319.465	1.83749		Fcgr2b	113.174	266.75	2.35698		Rps4x	126.952	97.655	0.769228		Rps4x	144.769	280.36	1.93661			Rps4x	1.30001	0.769228	1.93661	0.516367
Cd274	77.7313	171.463	2.20585		Dnajc7	127.838	64.0648	0.501138		Lfng	87.2175	126.728	1.45301		Lfng	103.269	56.1333	0.543563			Lfng	0.688226	1.45301	0.543563	1.83971
Unc93b1	157.007	292.18	1.86094		Rps27a	191.297	386.512	2.02047		Stk24	269.876	214.479	0.79473		Stk24	388.366	258.469	0.665528			Stk24	1.25829	0.79473	0.665528	1.50257
Pcbp1	222.356	166.229	0.747582		Pet100	51.307	120.457	2.34776		Rpl31	820.711	621.664	0.757471		Rpl31	962.326	1536.57	1.59672			Rpl31	1.32018	0.757471	1.59672	0.626283
Tgfbr1	210.669	149.255	0.708481		Ier5	511.766	249.01	0.486571		Myh9	543.74	432.152	0.794777		Myh9	692.495	332.638	0.480347			Myh9	1.25821	0.794777	0.480347	2.08183
Krt79	1429.03	958.604	0.670807		Gla	107.768	55.996	0.519595		Bub1b	114.471	83.8202	0.73224		Bub1b	165.379	113.238	0.68472			Bub1b	1.36567	0.73224	0.68472	1.46045
Cd300lf	758.102	1678.77	2.21444		Ifngr1	255.683	133.861	0.523541		Pafah1b1	212.989	175.574	0.824336		Pafah1b1	221.397	326.743	1.47582			Pafah1b1	1.2131	0.824336	1.47582	0.677589
Ier3	95.0555	440.169	4.63066		Psma3	96.852	193.922	2.00225		Emd	171.54	135.905	0.792264		Emd	195.461	137.938	0.705705			Emd	1.26221	0.792264	0.705705	1.41702
Ncor2	154.512	101.028	0.653851		Slc25a4	142.74	271.707	1.90351		Pik3cd	147.867	234.529	1.58608		Pik3cd	166.571	99.7103	0.598606			Pik3cd	0.630483	1.58608	0.598606	1.67055
Rassf4	330.093	239.705	0.726176		Herpud1	233.39	125.918	0.539518		Rpl5	145.611	109.461	0.751733		Rpl5	180.957	458.008	2.53103			Rpl5	1.33026	0.751733	2.53103	0.395096
H2-K1	1241.67	2258.03	1.81855		Rad23b	319.749	185.168	0.579106		Atp5h	167.935	131.277	0.781715		Atp5h	160.732	413.785	2.57439			Atp5h	1.27924	0.781715	2.57439	0.388442
E430025E21Rik	109.435	76.6797	0.700689		Ptpn12	537.44	286.201	0.532526		Pmepa1	105.06	77.9257	0.741728		Pmepa1	195.152	124.531	0.638123			Pmepa1	1.3482	0.741728	0.638123	1.5671
Fnta	165.013	123.527	0.748587		Chmp5	51.1545	104.359	2.04007		Tonsl	424.659	347.084	0.817322		Tonsl	439.23	305.096	0.694615			Tonsl	1.22351	0.817322	0.694615	1.43965
Srsf9	103.716	180.956	1.74473		Fam129b	787.552	396.339	0.503254		Npepps	106.557	153.302	1.43868		Npepps	113.257	75.5408	0.666985			Npepps	0.695081	1.43868	0.666985	1.49928
Nlrx1	185.163	132.192	0.713922		Lpcat3	549.702	235.446	0.428316		Ube2j1	225.484	183.915	0.815645		Ube2j1	263.638	125.906	0.477573			Ube2j1	1.22602	0.815645	0.477573	2.09392
Nap1l4	327.045	240.251	0.73461		Sh3pxd2b	765.518	389.529	0.508845		Dgkz	246.135	380.238	1.54483		Dgkz	299.134	142.942	0.477854			Dgkz	0.647319	1.54483	0.477854	2.09269
Mvd	93.2537	163.476	1.75302		U2af2	450.808	216.669	0.480624		Ralgds	370.533	573.03	1.5465		Ralgds	1028.44	327.018	0.317975			Ralgds	0.64662	1.5465	0.317975	3.1449
Hnrnpa0	555.914	417.796	0.751547		Ddx39b	254.322	139.141	0.547105		Cnot1	166.704	262.829	1.57662		Cnot1	187.475	72.9095	0.388902			Cnot1	0.63427	1.57662	0.388902	2.57134
Slamf9	294.9	212.597	0.720912		Dhx9	225.607	505.343	2.23992		Tapbp	391.391	578.854	1.47897		Tapbp	526.427	352.986	0.670532			Tapbp	0.676147	1.47897	0.670532	1.49135
Chil3	8056.12	19065.2	2.36655		Ociad1	350.175	204.309	0.583447		Rpl35a	204.141	154.827	0.758434		Rpl35a	255.669	623.444	2.43848			Rpl35a	1.31851	0.758434	2.43848	0.410092
Bckdk	74.5885	136.607	1.83148		Dgkz	299.134	142.942	0.477854		Rps28	1226.97	977.796	0.796919		Rps28	1404.56	2203.22	1.56862			Rps28	1.25483	0.796919	1.56862	0.637503
Serbp1	790.293	559.315	0.707731		Mrpl20	63.035	131.795	2.09082		Nucb1	77.6138	114.093	1.47001		Nucb1	74.154	112.079	1.51144			Nucb1	0.680267	1.47001	1.51144	0.661621
B3gnt7	78.8055	153.551	1.94848		Tpt1	374.363	934.817	2.49709		Actr10	118.776	99.7818	0.840082		Actr10	145.373	112.326	0.772676			Actr10	1.19036	0.840082	0.772676	1.2942
Marco	1073.76	2358.97	2.19692		Dbi	789.422	1587.67	2.01118		Ndufb9	156.426	125.703	0.803591		Ndufb9	137.862	205.227	1.48864			Ndufb9	1.24441	0.803591	1.48864	0.671754
Eef1g	99.6875	161.996	1.62504		Arf5	439.08	223.064	0.508026		Actl6a	158.343	132.471	0.836608		Actl6a	129.446	88.7215	0.685397			Actl6a	1.1953	0.836608	0.685397	1.45901
Il10rb	109.127	196.14	1.79736		Zswim8	164.916	88.577	0.537103		Rps29	1567.81	1208.59	0.770878		Rps29	1772.04	1236.54	0.697808			Rps29	1.29722	0.770878	0.697808	1.43306
Trim41	62.5533	103.733	1.65831		Rpl6	389.689	740.436	1.90007		Saraf	339.643	280.755	0.826618		Saraf	326.706	236.792	0.724785			Saraf	1.20975	0.826618	0.724785	1.37972
Stx16	101.501	74.2858	0.731872		Apbb1ip	434.474	252.916	0.58212		Atp5j	294.591	216.197	0.733887		Atp5j	305.241	993.511	3.25484			Atp5j	1.36261	0.733887	3.25484	0.307235
Dhx9	221.274	146.638	0.6627		Ndufa1	504.263	1091.78	2.1651		Zswim8	147.844	214.272	1.44931		Zswim8	164.916	88.577	0.537103			Zswim8	0.689983	1.44931	0.537103	1.86184
Copz1	116.774	188.496	1.6142		Rcl1	373.924	133.189	0.356193		Marveld1	206.355	167.917	0.813728		Marveld1	163.276	94.7392	0.580242			Marveld1	1.22891	0.813728	0.580242	1.72342
Smap2	129.944	215.73	1.66017		Mrps18c	60.8407	175.542	2.88527		Csnk2b	158.214	230.129	1.45454		Csnk2b	171.882	98.7687	0.574631			Csnk2b	0.687504	1.45454	0.574631	1.74025
Neurl1b	163.512	116.337	0.711486		Rps10	947.332	539.925	0.569942		Hdc	57.7307	305.207	5.28674		Hdc	373.147	74.67	0.200109			Hdc	0.189153	5.28674	0.200109	4.99727
Nmt1	232.515	170.048	0.731339		Mrps21	47.3825	108.632	2.29267		Atpif1	321.182	261.319	0.813617		Atpif1	296.411	705.594	2.38046			Atpif1	1.22908	0.813617	2.38046	0.420087
Dusp6	91.189	174.057	1.90875		Slc25a5	175.149	420.068	2.39835		Jagn1	135.795	104.457	0.769224		Jagn1	134.629	77.5135	0.575757			Jagn1	1.30001	0.769224	0.575757	1.73684
Cyp51	123.394	236.346	1.91537		Kdm6b	109.821	26.8818	0.244779
Fbxl5	99.2368	170.671	1.71984		Bcl3	160.751	55.981	0.348246
Fabp1	203.511	111.918	0.549937		Rpl41	100.925	196.546	1.94743		common	142
Gp49a	69.7635	141.064	2.02202		Hsd17b12	624.653	342.292	0.547972		up regulated in both	3	yellow background
Eif3g	136.402	99.272	0.72779		Grina	436.921	211.041	0.48302		1A3 up-KO down	16	red
Ube2l6	118.289	51.9997	0.4396		Aim2	152.633	72.419	0.474466		1A3 down-KO up	13	black
Glud1	772.251	564.688	0.731224		Lims1	57.2752	119.481	2.08608		1A3=KO	110	green
Rgcc	65.5285	197.391	3.0123		F7	499.978	958.009	1.9161
Nr4a1	63.6255	223.499	3.51272		Psmd4	365.16	185.215	0.507216			142
Fabp4	270.813	495.63	1.83016		Ndufa13	301.806	531.274	1.76032
Trappc3	129.724	84.0247	0.647719		Peli1	180.646	88.8985	0.492114
Atg101	69.768	115.502	1.65552		Polr2m	99.7548	223.798	2.24348
Ctsb	506.671	844.495	1.66675		Aldh2	317.683	152.79	0.480952
Ppp2r1b	103.566	75.2185	0.726289		Evl	62.7832	146.971	2.34093
Ets2	49.3503	136.163	2.75912		Txn-ps1	59.451	156.084	2.62543
Irf1	126.637	262.552	2.07325		Csnk2b	171.882	98.7687	0.574631
Ddx24	204.685	139.18	0.67997		Sec13	50.5403	100.339	1.98533
Aplp2	436.601	326.664	0.748199		Eif2s2	351.207	188.637	0.537111
Aifm2	62.2743	108.431	1.74119		Psma4	64.3595	154.238	2.3965
H2-DMa	190.007	136.237	0.717009		Socs2	156.269	67.9838	0.435042
Psmd2	166.407	246.484	1.48121		Ubc	2580.15	961.772	0.372758
Rpl9-ps6	98.0235	158.559	1.61756		Mark2	191.698	87.5215	0.45656
Fnip1	70.336	120.113	1.70771		Pabpc1	609.632	325.983	0.53472
Brk1	214.485	169.364	0.789633		Drap1	152.944	91.0945	0.595608
Cidec	666.714	409.167	0.613708		Spen	110.799	63.0722	0.569249
Ear1	1725.72	1062.04	0.61542		Npc1	181.32	110.696	0.610501
Ssbp4	151.918	252.948	1.66503		Atp6v1a	269.823	478.839	1.77464
Arrdc1	89.189	148.167	1.66127		Glrx3	58.791	114.01	1.93923
Use1	121.75	86.326	0.70904		Rela	378.976	217.955	0.575117
Chchd10	47.5095	103.874	2.18639		Pip5k1a	136.461	67.6252	0.495564
Romo1	166.865	116.574	0.698615		Polr2k	30.0292	102.944	3.42812
Tuba4a	544.384	380.84	0.69958		Amdhd2	88.5478	163.467	1.84609
Eif5b	280.799	219.495	0.78168		Rps16	614.465	1117.22	1.8182
Lsp1	397.067	277.441	0.698727		Dnaja2	182.186	114.917	0.630767
Unc119	343.548	260.511	0.758298		Rps4x	144.769	280.36	1.93661
Tap2	224.452	450.173	2.00566		Cap1	119.087	63.5755	0.533858
Acsl5	193.418	138.983	0.718564		Snrpd3	408.846	196.352	0.480259
Rpl35	327.577	229.514	0.700641		Spcs3	79.6275	225.976	2.83791
Tsn	212.523	159.264	0.749399		Prpf8	162.081	97.261	0.600077
Rpl14	402.966	643.249	1.59628		Arpc3	1010.06	554.845	0.549321
Psma2	348.264	268.109	0.769845		Gnai2	1088.6	626.074	0.575116
Soat1	86.9657	137.353	1.5794		Jdp2	104.32	36.616	0.350996
Sepp1	363.066	256.155	0.705533		2510039O18Rik	122.774	69.8465	0.568902
Cybb	1461.1	2414.01	1.65219		Rpl38-ps2	135.515	241.07	1.77892
Cyba	874.114	1366.65	1.56347		Eef1b2	605.011	1143.15	1.88948
Rnf6	110.626	74.515	0.673579		Marveld1	163.276	94.7392	0.580242
Atf4	224.644	377.082	1.67858		Arhgef2	185.129	105.664	0.570758
Pgls	250.759	416.64	1.66152		Stx16	69.8425	124.049	1.77613
Plin3	82.3063	136.589	1.65952		Clic1	781.86	379.704	0.485643
Tceb2	224.101	175.674	0.783906		Ino80b	25.9968	11.598	0.446133
Lrrc59	150.655	115.625	0.767481		Ndufa4	73.979	171.818	2.32252
Atxn10	275.967	210.31	0.762084		Ftl1	1154.93	2646.44	2.29143
Junb	132.399	286.716	2.16554		Lrp1	714.821	431.562	0.603735
Csnk1d	201.969	156.975	0.777228		Rpl18a	128.754	246.384	1.91361
Znhit1	80.217	143.812	1.79278		Atf4	352.309	185.392	0.52622
Lage3	71.9257	115.436	1.60493		Tap2	276.924	108.946	0.393415
Ubash3b	195.97	143.88	0.734196		Tmem258	261.979	544.317	2.07771
Pfkfb4	184.394	144.34	0.78278		R3hdm4	123.149	58.9228	0.478466
S100a8	128.647	914.904	7.11171		Ssh2	111.817	59.7835	0.534657
Gars	225.651	175.499	0.777747		Tmem63a	116.582	69.23	0.593828
Psmd3	265.58	210.408	0.792259		Aldoc	44.58	102.621	2.30195
Rpl28	432.112	315.26	0.72958		Hnrnpa2b1	244.947	560.658	2.2889
Coro1c	703.977	517.384	0.734944		Tcf25	428.569	266.529	0.621905
Hbb-bt	7363.8	1565.93	0.212652		Cd74	704.118	322.809	0.45846
Nedd9	190.093	139.339	0.733005		Stk40	138.89	78.0993	0.562309
Tmem259	109.229	164.188	1.50315		Fnip1	117.463	61.3012	0.521875
R3hdm4	125.25	216.394	1.72771		Tmem50a	833.604	472.398	0.566694
Cebpb	310.25	617.323	1.98976		Pycard	63.9557	126.043	1.97079
Mtdh	285.483	203.667	0.713413		Gripap1	118.075	67.948	0.575466
Atp6v1e1	348.576	530.703	1.52249		Chd8	121.497	71.971	0.592367
Dhrs1	131.398	97.328	0.74071		Rpl38	558.69	965.777	1.72865
Myo1f	194.121	135.593	0.698495		Nf2	103.492	60.2463	0.582136
Luzp1	111.675	80.8843	0.724281		Hspd1	58.3312	112.386	1.92668
Amz1	527.108	356.836	0.67697		Psap	3428.4	7479.63	2.18167
Cttnbp2nl	217.584	144.867	0.665799		Rpl37a	3372.59	6925.63	2.0535
Rpl36al	208.488	149.541	0.717262		Btk	228.634	111.212	0.48642
Arpc5l	123.073	96.6538	0.785337		Fus	2409.7	1166.51	0.48409
Eif4g1	200.776	158.965	0.791756		Plekhg1	212.034	128.144	0.604354
Cyb5a	158.193	120.386	0.76101		Atp5f1	101.053	189.853	1.87875
Bzw2	184.755	138.426	0.749241		Spcs1	138.32	238.653	1.72536
Grina	325.745	542.865	1.66653		Ehd1	820.473	370.421	0.451473
Arl8b	111.383	173.287	1.55578		Atp5a1	591.273	1071.87	1.81282
Tor1aip2	175.724	139.083	0.791487		Sin3b	496.865	255.577	0.51438
Cd84	190.622	287.77	1.50963		Magoh	233.853	152.139	0.650575
Hsp90aa1	107.435	73.259	0.68189		Ccdc47	90.2608	203.339	2.2528
Uhmk1	107.406	168.471	1.56854		Anxa1	190.023	436.132	2.29516
Commd7	188.108	151.9	0.807516		Rab11b	147.279	86.4732	0.587141
Clec4n	1133.87	801.528	0.706898		Cisd2	63.23	110.701	1.75076
Ccl4	21.4545	177.005	8.25025		Tmed3	81.4333	156.59	1.92293
Gpd2	119.471	93.7335	0.784573		Tmem167	99.5303	193.931	1.94847
Lsm6	127.287	91.3483	0.717657		Snrpe	192.053	347.096	1.80729
Rps16	453.844	348.418	0.767703		43532	117.238	215.399	1.83728
Tuba1b	380.802	263.08	0.690857		Rps12	227.614	454.664	1.99752
Slco2b1	103.369	67.4043	0.652074		43710	92.116	166.772	1.81045
Rps23	201.248	152.639	0.758466		Arpp19	333.107	581.604	1.74599
Cers2	195.286	293.968	1.50532		Add3	58.5523	103.965	1.77559
P2ry13	474.626	319.513	0.673189		Gde1	180.897	111.672	0.617325
Abhd17c	127.31	191.919	1.50749		Slc48a1	465.265	261.782	0.562652
Tmsb10	64.8302	106.535	1.64329		Dynlrb1	115.32	215.37	1.86759
Ear2	559.333	380.727	0.68068		Ppp1r18	320.365	199.567	0.622936
Lmna	654.139	475.21	0.726467		Sec24c	55.873	102.364	1.83209
Klf13	400.89	314.488	0.784474		Sema4a	247.442	145.585	0.588361
Alox5	232.07	156.886	0.676026		2410015M20Rik	118.862	206.186	1.73466
Rtfdc1	124.785	191.275	1.53283		Golga2	133.571	82.704	0.619176
Fam96a	107.363	81.3372	0.757589		Rps25	2874.72	1639.69	0.570382
Dpm3	127.175	91.0067	0.7156		Psme1	261.264	175.89	0.673226
Irg1	19.6625	142.014	7.22259		Setd8	265.31	152.108	0.573321
H2afy	85.422	130.067	1.52264		Abracl	233.467	440.526	1.88689
Ctsl	233.036	390.032	1.6737		Psme2b	74.1243	132.323	1.78515
Fam168b	129.664	102.497	0.79048		Gm5963	375.963	248.771	0.661691
Rpl11	839.856	663.322	0.789804		Cisd1	64.5105	119.737	1.85608
Tyrobp	1593.86	1172.69	0.735756		Ak2	217.644	125.704	0.577567
Prkcd	103.106	160.865	1.5602		Baz2b	147.218	90.7823	0.616651
Ddx5	256.629	390.027	1.51981		Chmp4b	1382.33	813.325	0.588374
Anxa5	509.08	410.244	0.805854		Nmt1	215.114	133.972	0.622795
Rac1	640.384	498.056	0.777746		Eif3j2	105.212	52.4195	0.498229
Plaur	75.297	137.309	1.82356		Riok3	225.939	138.847	0.614533
Tpra1	61.2212	106.323	1.7367		Tspo	181.632	359.074	1.97693
Tcirg1	106.478	165.463	1.55395		Rtfdc1	145.632	88.8345	0.609993
Kazald1	108.686	62.7383	0.577244		Etfa	56.6803	128.624	2.26929
Fcgr3	372.83	591.772	1.58724		Urm1	132.791	78.3023	0.589664
Ccnl1	73.3773	121.082	1.65012		Tle3	127.748	77.156	0.603973
Cdh1	288.07	573.565	1.99106		Fam120a	251.026	163.881	0.652845
Cpsf1	109.504	87.4522	0.798618		Acap2	97.0793	179.881	1.85293
Elavl1	80.3955	127.478	1.58564		1810022K09Rik	128.132	249.155	1.94452
Sdhc	164.832	126.625	0.76821		Myd88	223.756	132.45	0.591939
Bst2	67.1713	124.265	1.84998		Ndufs4	80.3852	137.143	1.70607
Stom	118.013	176.981	1.49967		Trappc1	94.1692	171.242	1.81844
Gla	98.3438	151.257	1.53805		Anxa2	6479.17	3516.63	0.542759
Spint1	111.822	79.215	0.708403		Mcoln3	63.9635	144.147	2.25358
S100a9	100.38	885.588	8.82236		Notch2	137.744	274.039	1.98949
Card11	165.977	127.448	0.767869		Tceb1	89.1243	212.673	2.38625
Pip5k1a	106.017	76.7678	0.724106		Btf3	37.2215	100.874	2.71011
Chmp3	241.459	196.929	0.815578		Fabp4	414.801	824.474	1.98764
Fus	1560.6	1088.61	0.697559		Actn1	709.667	458.515	0.6461
Vapb	385.75	299.845	0.777305		Btbd9	111.709	58.6937	0.525416
Cd36	242.973	397.82	1.63731		Idh3g	124.589	71.8713	0.576866
P2rx4	120.095	183.69	1.52953		Ski	243.807	155.381	0.637312
Vimp	123.428	186.321	1.50955		Uqcrq	236.194	386.341	1.63569
6330416G13Rik	114.919	92.2555	0.802784		Flna	1279.74	792.734	0.619448
Tuba1c	429.511	322.931	0.751857		Rin3	138.066	74.8417	0.542072
Pitpna	468.129	369.652	0.789637		Spryd3	166.856	103.035	0.617505
Sec63	126.159	183.995	1.45845		Cox8a	404.616	723.757	1.78875
Perp	115.482	81.7905	0.708255		Ndufb2	62.88	137.723	2.19025
Gde1	87.7772	130.592	1.48776		Hr	140.192	55.107	0.393083
Scarb1	177.489	130.344	0.73438		Rnf10	387.003	208.84	0.539636
Spns1	140.847	215.741	1.53174		Eny2	54.8798	108.391	1.97506
Mapk3	787.683	1217.42	1.54558		Cebpa	949.655	424.294	0.446787
Nagpa	260.472	211.065	0.810315		Ndufab1	58.7945	108.346	1.84279
Ncl	658.076	514.28	0.781491		Prpf19	101.828	167.939	1.64925
Hcar2	189.137	370.668	1.95978		Rnf6	124.893	68.9898	0.552392
Lasp1	169.807	268.799	1.58297		Bola2	300.871	481.058	1.59888
Plcg2	108.259	82.0895	0.758271		Eml2	169.45	82.8272	0.488802
Mtmr6	159.968	124.182	0.776296		Ddx24	250.138	143.72	0.574563
Hmox1	160.218	255.739	1.59619		Sec63	165.969	108.218	0.652041
Mtch1	113.8	171.403	1.50617		Ctsa	1471.02	910.432	0.618912
Map2k2	413.39	300.046	0.72582		Ctsl	241.813	466.905	1.93085
Ddx21	189.624	139.531	0.735834		Gnl1	111.117	71.3547	0.64216
Clptm1	164.038	131.06	0.798957		Selt	71.204	137.615	1.93269
Sod1	313.466	251.267	0.801576		Huwe1	135.13	83.9672	0.62138
Nampt	194.489	318.564	1.63795		Uqcrb	125.265	226.155	1.80541
Ahnak	847.04	648.87	0.766045		Cflar	285.801	139.805	0.489169
Ch25h	98.8675	246.732	2.49559		Ear2	403.867	804.343	1.9916
Pim1	106.148	200.588	1.88971		Srsf5	206.234	112.364	0.544835
Hsd17b11	264.792	200.923	0.758795		Gm6265	66.0482	125.685	1.90293
Dlst	198.404	164.638	0.829813		Mdh2	334.986	214.394	0.640008
Ctsk	770.47	1373.86	1.78314		Gak	170.421	111.085	0.651827
Msmo1	99.813	158.7	1.58997		Commd3	77.3135	128.626	1.66369
Cbfb	137.765	109.034	0.791451		Jagn1	134.629	77.5135	0.575757
Pfn1	225.532	383.04	1.69838		Taok3	167.863	98.0418	0.584059
Axl	816.289	643.693	0.78856		Nxf1	60.6423	115.251	1.9005
Cd52	530.42	783.841	1.47777		Eif4h	189.764	325.144	1.71341
Mmp19	352.078	580.8	1.64963		Tagln2	3779.93	2201.14	0.582324
Srsf11	162.064	134.016	0.826934		Atrnl1	51.7375	121.013	2.33898
Pdia6	254.591	361.933	1.42163		Irf5	168.796	97.985	0.580493
Atg2a	72.0465	112.704	1.56433		Lcp2	174.666	96.9032	0.554793
Myl12a	393.193	315.75	0.80304		Fam21	113.781	76.5853	0.673096
Srebf2	164.369	246.589	1.50022		Msn	886.571	562.048	0.633957
Lhfpl2	96.2575	148.998	1.54791		Acin1	119.561	72.077	0.602847
Camkk2	222.279	174.5	0.785049		Rpl22	534.312	906.746	1.69703
Map1lc3a	266.796	199.754	0.748715		Mpdu1	308.412	189.464	0.614319
Mgat4b	286.105	231.938	0.810675		S100a10	397.689	697.102	1.75288
Btg1	93.855	150.157	1.59988		Pdia6	224.986	350.409	1.55747
Slc9a4	171.064	132.418	0.774083		Srp14	218.988	354.221	1.61753
Pltp	145.305	96.1755	0.661889		Rps27	565.995	967.519	1.70941
Rps4x	126.952	97.655	0.769228		Wfdc21	1265.55	2692.78	2.12775
Lfng	87.2175	126.728	1.45301		Fam105a	81.559	168.736	2.06888
Stk24	269.876	214.479	0.79473		Becn1	153.301	102.215	0.666757
Fcgrt	237.428	172.474	0.726423		Stom	112.219	69.7493	0.621547
Rpl31	820.711	621.664	0.757471		Ctsc	535.654	968.795	1.80862
Myh9	543.74	432.152	0.794777		Slc38a1	153.01	102.446	0.669536
Arglu1	131.128	107.557	0.820243		Ppp3r1	430.996	267.091	0.619706
Bub1b	114.471	83.8202	0.73224		Uba1	253.979	168.995	0.665388
Pafah1b1	212.989	175.574	0.824336		Psmd13	285.211	181.33	0.635776
Aldoa	602.476	896.739	1.48842		Ptms	460.407	296.436	0.643856
Chic2	137.26	103.355	0.75299		Nfkbib	180.343	92.9385	0.515343
Ndufb11	108.493	85.9718	0.792416		Cnih4	82.2283	139.442	1.6958
4933426M11Rik	82.4688	137.258	1.66436		Dohh	115.069	66.4813	0.577754
Emd	171.54	135.905	0.792264		Mkks	62.6295	120.008	1.91616
Hspa5	1307.23	2121.62	1.62299		Spag9	119.763	73.4103	0.612964
Gpx1	1996.74	1497.07	0.749755		Srxn1	177.375	106.215	0.598819
Pik3cd	147.867	234.529	1.58608		Ufc1	80.0748	136.889	1.70952
Phlpp1	7.25775	3.88425	0.535187		Dync1h1	221.868	143.586	0.647166
Toporsos	26.8153	17.8505	0.665685		Snord89	114.767	25.3795	0.221139
Plekhm2	155.121	229.873	1.4819		Ndufc1	120.496	213.334	1.77046
Srgn	156.227	409.286	2.61982		AI662270	115.167	68.2127	0.592296
Rpl5	145.611	109.461	0.751733		Rab11fip1	105.823	57.5953	0.544262
Parvg	158.326	121.737	0.768901		Iqgap1	2463.99	1576.62	0.639864
Atp5h	167.935	131.277	0.781715		Atp6v0d2	641.176	1117.01	1.74213
Rps17	241.215	192.178	0.796709		Atp13a2	91.7722	150.911	1.64441
Pmepa1	105.06	77.9257	0.741728		Stk38	210.867	123.378	0.585097
Cyb5r3	658.675	513.937	0.780259		Erp29	149.801	232.663	1.55314
Basp1	95.8017	238.742	2.49204		Eif3i	165.833	249.759	1.50609
Phlda1	168.112	109.358	0.650509		Zbtb22	108.102	65.9015	0.609623
Tonsl	424.659	347.084	0.817322		Prkaca	209.76	126.249	0.601875
Sun2	221.057	179.965	0.814109		Cln5	257.807	166.848	0.647182
Npepps	106.557	153.302	1.43868		Ets2	209.028	70.0675	0.335206
Fkbp1a	322.37	257.255	0.798012		Azin1	74.8785	120.858	1.61405
Ube2j1	225.484	183.915	0.815645		Atp5g2	54.2165	118.185	2.17987
Rpsa-ps10	12.122	6.755	0.557251		Uhmk1	94.761	158.456	1.67216
Dgkz	246.135	380.238	1.54483		Smarcc2	225.85	113.619	0.503073
Ralgds	370.533	573.03	1.5465		Ly75	360.636	227.89	0.631911
Cnot1	166.704	262.829	1.57662		Fbxl14	87.4762	198.706	2.27154
Slc25a39	144.783	118.918	0.821355		Pttg1	101.198	66.7843	0.659936
Tapbp	391.391	578.854	1.47897		2310047M10Rik	173.279	106.906	0.61696
Rpl35a	204.141	154.827	0.758434		Ppm1a	165.066	107.281	0.649929
Gnai3	86.4738	133.964	1.54919		Vat1	491.273	318.76	0.648844
Ptafr	38.2692	100.177	2.61768		Unc119	322.051	212.856	0.66094
Rps28	1226.97	977.796	0.796919		Vasp	1444.57	852.315	0.590013
Alox5ap	754.611	590.183	0.782102		Rps2	158.564	278.992	1.75949
Nucb1	77.6138	114.093	1.47001		Wasf2	127.307	83.9363	0.659322
Actr10	118.776	99.7818	0.840082		Bax	104.455	61.714	0.590818
Tacc1	159.931	128.286	0.802135		Flot2	170.77	109.984	0.644046
Ndufb9	156.426	125.703	0.803591		Rpl39	1114.54	2013.32	1.80642
Actl6a	158.343	132.471	0.836608		Setd5	205.912	125.631	0.610121
Ppp6r3	166.873	137.661	0.824949		Pla2g16	75.2177	140.384	1.86637
Rps29	1567.81	1208.59	0.770878		Kctd10	109.125	70.8383	0.649148
Deptor	101.948	79.8762	0.7835		Spn	50.7165	102.928	2.02947
Saraf	339.643	280.755	0.826618		Gng5	104.076	197.759	1.90014
Anapc11	231.137	195.303	0.844967		Cd274	177.192	83.7225	0.472496
Atp5j	294.591	216.197	0.733887		Rcc2	129.407	79.3332	0.613052
Capn2	247.263	203.016	0.821053		Pdia3	908.644	469.692	0.516916
Zswim8	147.844	214.272	1.44931		Slc7a5	238.205	129.714	0.544548
Slc16a3	69.405	132.426	1.90801		Ctsk	769.175	1601.02	2.08147
Marveld1	206.355	167.917	0.813728		Acaa1b	424.653	201.548	0.474619
Kdm4a	129.787	104.163	0.802564		Pltp	105.527	54.6453	0.517833
Atp5e	619.394	886.84	1.43179		Hmgcs1	121.603	195.24	1.60555
Csnk2b	158.214	230.129	1.45454		Ndufv2	84.6925	141.938	1.67592
Hdc	57.7307	305.207	5.28674		Slc38a10	219.766	148.936	0.677705
Klf10	109.179	89.6568	0.82119		2310011J03Rik	124.128	79.869	0.643438
Atpif1	321.182	261.319	0.813617		Plec	591.832	361.81	0.611339
Jagn1	135.795	104.457	0.769224		Glyr1	228.673	421.75	1.84434
Arf1	301.238	246.762	0.819162		Sirt2	359.034	254.216	0.708056
Nasp	130.782	103.483	0.791258		Krtcap2	232.146	364.04	1.56815
Wdfy3	121.289	96.5462	0.795998		Axl	804.608	535.335	0.665337
					Capn1	232.826	125.019	0.536966
					D8Ertd738e	93.9743	152.251	1.62014
					Rsl1d1	217.382	143.765	0.661347
					Anapc5	164.992	108.383	0.656901
					Cltc	442.226	302.2	0.683362
					Ppp1r9b	163.647	109.772	0.670788
					Hsdl1	104.534	173.172	1.65661
					Skil	156.51	95.0877	0.60755
					Rassf5	123.028	80.279	0.652528
					Lmnb1	356.356	120.545	0.338272
					Exosc5	114.504	77.658	0.678209
					Npepps	113.257	75.5408	0.666985
					Eif3h	364.396	231.617	0.635618
					Lcp1	1418.62	933.536	0.658061
					Atp6v1g1	170.647	283.683	1.6624
					Adrbk1	294.092	211.121	0.717874
					Actl6a	129.446	88.7215	0.685397
					Kpnb1	103.044	178.52	1.73246
					Pcnxl3	139.145	58.6095	0.42121
					4930506M07Rik	321.407	202.121	0.628865
					Rpl27	871.094	1414.93	1.62432
					Apoa1bp	110.605	74.317	0.671915
					Cd300lf	1235.45	603.716	0.488659
					Klf13	465.657	314.341	0.675048
					Ncln	291.674	188.199	0.645238
					Zbtb7a	550.256	373.031	0.677922
					Sdhc	143.051	229.918	1.60725
					Cox5b	146.29	224.687	1.5359
					Gm22710	536.368	220.795	0.411649
					Diap2	254.609	160.404	0.63
					Cpt1a	177.609	289.534	1.63018
					Tcp1	99.2215	162.766	1.64044
					Pip4k2c	129.26	86.2095	0.666949
					Psma1	103.848	169.532	1.6325
					Rabl6	105.553	64.2618	0.608813
					Crip1	190.854	444.356	2.32825
					Hebp1	190.632	332.228	1.74278
					Slc12a7	121.543	80.6855	0.663842
					Rab8a	353.186	234.053	0.662688
					1810037I17Rik	299.657	600.125	2.00271
					Pik3cd	166.571	99.7103	0.598606
					Gatad2a	124.996	87.409	0.699292
					Pea15a	116.842	77.6538	0.664605
					Syk	554.614	353.507	0.637392
					Stk24	388.366	258.469	0.665528
					Jak2	112.384	59.7275	0.531459
					Ifrd1	965.206	497.192	0.515115
					Cox14	103.073	154.276	1.49676
					Shfm1	740.105	1281.83	1.73196
					Mapkapk3	197.731	128.539	0.650072
					Rpl14	490.28	320.676	0.654067
					Tnfrsf21	231.653	140.975	0.608562
					Uxs1	182.64	116.469	0.637693
					D17Wsu92e	378.502	268.544	0.709492
					Cox7b	283.428	455.24	1.60619
					Ctbp1	221.145	156.06	0.705692
					Cd200r4	70.3155	112.036	1.59333
					Map2k3	268.438	183.068	0.681974
					Ctss	4608.74	8404.72	1.82365
					Vps72	129.037	67.3398	0.521864
					Zfp36	202.57	90.0775	0.444673
					Mgat4b	288.297	201.211	0.697929
					Atf6b	167.546	112.672	0.672485
					Rbms1	548.707	390.71	0.712056
					Dynll1	59.6213	101.496	1.70234
					Rnf7	61.403	108.941	1.7742
					Fn1	566.618	995.266	1.7565
					Rpn2	176.906	271.561	1.53506
					Coro1a	325.871	191.813	0.588618
					Ube2z	162.04	248.038	1.53072
					Yeats4	179.723	126.788	0.705464
					Rbx1	70.8153	112.973	1.59532
					Kmt2e	162.641	116.695	0.717503
					Junb	496.691	230.738	0.464551
					Eif3e	85.811	153.084	1.78396
					Ube2d3	332.213	223.772	0.67358
					Capns1	408.204	293.616	0.719287
					Gcnt2	130.196	210.704	1.61837
					Rpl36	231.287	383.03	1.65608
					Sap30l	102.659	65.4073	0.63713
					Bak1	121.817	85.156	0.69905
					Txn1	1808.15	3087.14	1.70735
					Rnf220	126.828	86.638	0.683115
					Snx5	524.27	339.227	0.647046
					Plaur	152.549	83.5445	0.547657
					Pim3	127.514	73.3893	0.575537
					Prcp	158.71	105.336	0.6637
					Abhd12	1078.97	699.012	0.647852
					Csnk1g2	246.611	172.925	0.701204
					Dnajb11	66.724	116.882	1.75172
					Aff1	105.231	69.0182	0.655877
					Rmnd5a	64.9022	121.716	1.87537
					Ppp3ca	199.295	305.564	1.53323
					Csde1	469.418	332.087	0.707443
					Mpeg1	866.298	1404.45	1.62121
					Gsk3b	154.324	101.886	0.660211
					2510009E07Rik	57.2137	101.169	1.76827
					Rps28	1404.56	2203.22	1.56862
					Ndufa3	226.322	333.253	1.47247
					Jup	215.304	109.32	0.507747
					Slirp	124.899	187.145	1.49837
					Supt6	108.789	71.3102	0.655493
					Ccdc115	218.702	153.524	0.701979
					Fam168b	118.734	177.588	1.49568
					Ccnl1	110.031	67.4378	0.612895
					Gabarap	2105.88	1420.45	0.674515
					Tubb4b	59.2332	100.536	1.69729
					Uqcrfs1	287.255	453.607	1.57911
					Snd1	118.877	82.227	0.691695
					Znfx1	65.1755	101.906	1.56357
					Rps18	356.965	526.714	1.47553
					Cmip	216.38	152.969	0.706947
					Pik3r1	111.552	71.0685	0.637087
					Ndufb5	133.229	205.394	1.54165
					Pafah1b1	221.397	326.743	1.47582
					Tonsl	439.23	305.096	0.694615
					Phb2	325.647	234.051	0.718726
					Brd4	148.79	96.6128	0.649322
					Tapbp	526.427	352.986	0.670532
					Atf5	183.983	105.558	0.573736
					Rsrp1	105.888	196.281	1.85366
					Mapkapk2	854.339	520.654	0.609423
					Pigt	271.427	156.043	0.574901
					Id2	266.579	174.087	0.65304
					Scap	182.36	119.66	0.656175
					Cic	115.311	80.1245	0.694857
					Isg15	288.971	119.329	0.412943
					Cpne5	111.409	65.181	0.585059
					Stk17b	86.7027	141.221	1.6288
					Hpcal1	450.718	277.776	0.616297
					Pbxip1	240.963	162.841	0.675793
					Actn4	250.431	177.768	0.709849
					Cct2	134.402	200.622	1.49269
					Tnfaip2	1528.72	938.758	0.614083
					Ccnd2	1860.31	1013.14	0.54461
					Fam96a	91.893	144.222	1.56946
					Copb2	102.937	71.7043	0.696584
					9130401M01Rik	83.8695	133.103	1.58703
					Rab1	242.9	377.594	1.55453
					Arhgef7	109.993	66.665	0.606087
					Hsp90ab1	1697.95	1021.62	0.601675
					Pex11a	325.763	203.045	0.62329
					Mbnl2	109.286	68.5233	0.62701
					Ap3d1	137.018	206.358	1.50606
					Magt1	85.654	133.549	1.55917
					Fam129a	246.712	151.936	0.615843
					BC031181	99.8815	143.81	1.4398
					Chmp1a	230.286	158.83	0.689705
					Tnip1	275.8	136.693	0.495622
					Tmx1	171.856	243.902	1.41922
					Nr4a1	215.039	70.3642	0.327217
					Cops5	149.804	104.669	0.698703
					AI413582	122.187	82.7495	0.677238
					Mxd1	233.518	66.6553	0.28544
					Tgfbr2	137.444	231.34	1.68317
					Fbxl5	113.835	179.393	1.5759
					Pqlc3	61.761	115.654	1.87261
					Rpl23	980.488	1635.19	1.66773
					Klc1	225.983	144.212	0.638155
					H2-K1	1569.84	1005.34	0.640411
					Psmc1	237.986	156.585	0.657959
					Bsg	268.429	199.52	0.743288
					Rbm17	81.4315	147.119	1.80666
					Ms4a6d	211.407	326.26	1.54328
					Eif5b	269.144	198.039	0.735811
					Tpp2	67.9047	115.733	1.70434
					Hdgf	344.645	239.028	0.693548
					Nucb1	74.154	112.079	1.51144
					Itgax	977.618	631.208	0.64566
					Rpl31	962.326	1536.57	1.59672
					Pfkfb4	172.41	126.002	0.730827
					Actr1b	119.198	81.594	0.684523
					Arl8b	110.824	166.068	1.49849
					Tsc22d4	103.231	69.3533	0.671829
					Naaa	290.851	479.946	1.65014
					Rpl36a	1234.06	2047.15	1.65887
					Fkbp2	144.917	227.007	1.56646
					Zfp703	199.577	118.369	0.593099
					Saraf	326.706	236.792	0.724785
					Vapb	346.01	242.571	0.701051
					Ddb1	568.413	409.919	0.721165
					Mmp8	69.414	141.066	2.03223
					Ndufb3	227.744	380.267	1.66971
					Ear1	1200.25	701.42	0.584393
					Ndufb9	137.862	205.227	1.48864
					Nop58	98.7318	153.018	1.54983
					Elovl1	158.145	110.727	0.700161
					Trib1	192.613	93.1015	0.483361
					Tkt	659.673	427.929	0.648699
					Tnf	100.154	44.8855	0.448166
					Skiv2l	67.175	109.61	1.63171
					Slc7a1	105.091	63.6963	0.606106
					Tardbp	69.624	116.187	1.66878
					Smarcd2	120.585	82.9507	0.687903
					Hyou1	110.123	61.653	0.559855
					Hmox1	144.613	92.33	0.638465
					Atp6v1f	1002.71	697.605	0.695717
					Rpl9	318.808	468.36	1.4691
					Psmb4	237.124	350.53	1.47825
					Rpl13a	690.875	1062.51	1.53792
					Sec22b	113.38	81.8347	0.721774
					Polr2g	68.1825	106.8	1.56638
					Sdf4	189.889	140.328	0.739001
					Rsu1	97.1637	147.202	1.51499
					Cox6b1	635.028	959.323	1.51068
					Pmepa1	195.152	124.531	0.638123
					Polr2a	183.985	135.718	0.737658
					Rnh1	1358.49	963.104	0.708952
					Ccnk	123.507	187.89	1.52128
					Qsox1	937.338	593.054	0.6327
					Nagpa	196.077	143.553	0.732123
					Irf8	136.845	94.2043	0.6884
					Hnrnpl	170	115.993	0.682309
					Grpel1	204.963	134.861	0.657976
					Card11	105.246	74.0393	0.703484
					Adam17	537.158	346.401	0.644876
					Lima1	766.382	482.322	0.62935
					Vcp	303.67	201.746	0.664358
					Srp9	75.3915	135.214	1.7935
					Hsd3b7	127.526	199.363	1.56332
					Ncor2	179.81	119.48	0.664477
					Rpl22l1	75.794	124.903	1.64793
					Mertk	372.732	245.469	0.658566
					C77080	69.336	117.477	1.69431
					Stk10	112.688	196.316	1.74212
					Purb	312.487	227.607	0.728372
					Mtdh	563.66	376.7	0.66831
					Calm2	177.257	264.63	1.49291
					Eif1ax	83.7302	124.85	1.4911
					Sqstm1	718.443	492.596	0.685644
					Swi5	278.007	182.842	0.657687
					Rpl37	1998.91	3192.47	1.59711
					Tpd52l2	73.4335	112.192	1.5278
					Fnta	129.529	185.767	1.43417
					Mapre1	334.756	243.106	0.726218
					Stat6	118.912	86.2168	0.725045
					Plek	1440.86	842.166	0.584487
					Isoc2a	389.956	266.521	0.683464
					Slc39a11	151.725	102.372	0.67472
					Chmp2a	200.119	305.707	1.52763
					Sae1	259.555	170.529	0.657005
					Atp6ap1	1032.82	739.854	0.716344
					Emd	195.461	137.938	0.705705
					Mfsd12	230.37	155.506	0.675025
					Pfkfb3	121.651	69.7347	0.573234
					Srp19	71.01	108.787	1.532
					Nabp1	165.946	270.986	1.63298
					Hck	593.209	377.3	0.636033
					Mpc2	124.069	206.648	1.6656
					Lhfpl2	74.8858	117.014	1.56257
					Rtcb	141.653	106.491	0.751777
					S100a11	526.694	355.828	0.675589
					Tm9sf4	166.801	99.8113	0.598383
					Irf1	175.645	96.873	0.551528
					Actb	13132.1	8168.34	0.622014
					Pim1	345.244	188.928	0.547232
					Atg3	77.5182	120.816	1.55854
					Cux1	102.123	69.7583	0.683084
					Atxn1	157.713	112.208	0.711471
					Rrs1	67.8377	124.041	1.8285
					P2ry14	408.208	276.199	0.676613
					Itpr2	208.002	146.86	0.706051
					Nfkb2	108.002	61.904	0.573177
					Cbfb	115.107	168.185	1.46112
					Bcl2a1d	171.973	348.869	2.02863
					Anp32a	156.504	98.0652	0.6266
					Naca	150.72	249.178	1.65325
					Rpl3	769.672	1135.6	1.47543
					Higd2a	136.042	103.348	0.759679
					Taok1	149.71	107.556	0.718425
					Crlf2	302.333	231.664	0.766253
					Atp6v1e1	520.16	383.972	0.73818
					Batf	108.378	70.3402	0.649027
					Tnfrsf1b	243.474	156.392	0.642336
					Rab5c	2786.89	1879.19	0.674296
					Mgst1	186.462	296.938	1.59248
					Hsbp1	108.52	163.421	1.5059
					Acaa1a	199.452	149.602	0.750062
					Lamtor1	288.989	187.481	0.648748
					43723	117.525	193.165	1.64361
					Sumo3	320.005	227.206	0.710007
					Gtf2h5	120.656	173.722	1.43981
					Tuba1c	561.35	387.354	0.690041
					Cotl1	4070.33	2796.34	0.687006
					Rps7	415.427	626.109	1.50715
					Snrpb2	160.268	117.006	0.730067
					Lrp10	173.302	123.77	0.714187
					St13	299.835	226.228	0.754506
					Sec11a	97.3817	141.365	1.45166
					Rps29	1772.04	1236.54	0.697808
					Pebp1	91.1192	132.844	1.45791
					Myl12b	259.955	185.209	0.712467
					Sidt2	125.326	94.0933	0.750785
					Ergic1	150.084	108.459	0.722651
					Rpl18	225.567	323.747	1.43526
					Tnfaip8	152.778	108.504	0.710206
					Ndufb10	100.837	155.438	1.54147
					Ifitm2	130.598	56.3528	0.431497
					Cox7c	225.274	319.103	1.41651
					Rplp0	704.875	1022.74	1.45095
					Rplp2	993.263	1451.28	1.46113
					Fam49b	316.121	220.394	0.697182
					Itpripl2	316.854	230.321	0.7269
					Psmb5	161.65	225.005	1.39193
					Gba	126.009	181.66	1.44164
					Gab2	262.672	178.617	0.68
					Gar1	73.5457	114.211	1.55292
					Esrra	81.7627	119.431	1.4607
					Ddost	176.872	133.481	0.754677
					Zfp770	14.7745	7.835	0.530306
					Usp14	139.339	105.662	0.758309
					Eif4b	104.297	149.428	1.43272
					Ndufa6	214.606	307.828	1.43439
					Hvcn1	246.763	361.71	1.46582
					Mbnl1	255.685	192.972	0.754727
					Ehbp1l1	152.985	115.097	0.752341
					H2-DMb1	695.379	481.517	0.692452
					Bhlhe40	134.375	90.1515	0.670895
					Actr10	145.373	112.326	0.772676
					Arl2bp	99.1532	169.349	1.70795
					Gas5	236.435	347.968	1.47173
					Pgrmc2	117.022	84.8245	0.724856
					Abhd16a	127.401	92.4903	0.725977
					Tyrobp	1656.32	2449.06	1.47861
					Chtf8	202.05	125.801	0.622623
					Cdc42ep3	98.8893	166.85	1.68724
					Mgat1	225.685	176.601	0.782509
					Ufd1l	104.358	80.2295	0.768793
					Ddx50	66.806	102.05	1.52756
					Atp6v0a1	133.051	92.0433	0.691789
					Mob1a	184.415	288.951	1.56685
					Mdm2	134.821	96.5247	0.715946
					Atp6ap2	649.543	490.394	0.754984
					Gpcpd1	184.247	299.127	1.62351
					Hsd17b4	91.7097	142.918	1.55837
					H2-Eb1	810.211	445.362	0.549686
					Col4a3bp	90.2825	127.375	1.41084
					Psmd6	78.2668	112.242	1.4341
					Stx6	137.982	105.757	0.76645
					Arhgap1	106.237	74.986	0.70584
					Sp1	137.627	102.475	0.744586
					Snrnp70	329.282	459.4	1.39515
					Ddx6	485.125	349.065	0.719535
					Ubb	284.471	210.377	0.739538
					Fam32a	119.474	80.4485	0.673356
					Coro1c	700.299	1025.91	1.46495
					Gp49a	177.939	111.163	0.62473
					Higd1a	97.3482	136.446	1.40163
					Sec61a1	650.218	477.41	0.734231
					Ppig	121.973	86.1172	0.706035
					Atp10a	141.138	99.1905	0.70279
					Ythdf3	101.323	75.049	0.740692
					Pdcd6	77.6308	115.704	1.49044
					Hdc	373.147	74.67	0.200109
					Acads	209.739	158.501	0.755705
					Rab31	124.199	93.5695	0.753385
					Jak1	264.956	203.226	0.76702
					Csf1r	370.984	253.803	0.684136
					Wipf1	97.869	132.978	1.35874
					Ndufc2	132.494	188.688	1.42413
					Smdt1	167.662	234.452	1.39836
					Edf1	182.304	132.025	0.724205
					Soat1	72.0508	102.439	1.42177
					Ier3	728.099	262.386	0.360372
					Mgrn1	112.565	86.2608	0.766319
					Ccl9	1044.24	520.549	0.498497
					Marco	1334.49	2384.62	1.78691
					Rps24	2695.03	1821.55	0.675893
					Ube2j2	124.118	95.4897	0.769345
					Pcbp1	190.016	258.006	1.35781
					Ssbp4	147.496	104.183	0.706346
					Zranb2	75.8265	107.025	1.41145
					2310036O22Rik	160.476	121.184	0.755154
					Hspa4	188.404	283.267	1.50351
					Vav1	166.212	229.004	1.37778
					Rnf13	70.312	107.936	1.5351
					Eef2	2514.79	1797.83	0.714902
					Rpl12	334.596	468.552	1.40035
					Kdelr2	68.8417	102.008	1.48178
					Tmem189	69.55	103.614	1.48978
					Anxa4	340.292	259.685	0.763125
					Fth1	11275.4	19108.9	1.69473
					Ewsr1	107.425	167.154	1.55601
					Snrpf	78.4555	140.78	1.79439
					Emc7	122.767	186.745	1.52114
					Ncor1	152.204	107.189	0.704242
					Dstn	264.475	180.534	0.682615
					Fas	252.566	140.337	0.555645
					Canx	339.544	463.361	1.36466
					Per1	202.036	116.518	0.576722
					Bub1b	165.379	113.238	0.68472
					Tmem109	129.69	99.5855	0.767876
					Rps20	1944.48	1409.43	0.724836
					Sptlc2	116.305	160.726	1.38194
					Tmbim6	1200.64	879.357	0.732408
					Hexa	505.064	721.332	1.4282
					Cwc15	255.088	196.041	0.768525
					Hnrnpa0	617.525	477.754	0.773659
					Abcf1	129.946	101.331	0.77979
					Zfp706	111.411	153.697	1.37955
					Bud31	103.642	77.4537	0.747324
					Ankrd11	158.858	109.338	0.688273
					Atp5c1	76.223	109.769	1.44011
					Ccdc88a	260.093	179.576	0.690429
					Wbp11	68.7905	100.687	1.46368
					Cd24a	141.741	229.755	1.62094
					Nampt	432.411	304.702	0.704657
					Hsd17b11	277.601	399.691	1.4398
					Aamp	282.631	215.803	0.763549
					Mllt6	190.865	114.694	0.600918
					Hnrnpul2	221.794	160.687	0.724488
					Creg1	580.703	441.134	0.759655
					Pa2g4	192.208	148.03	0.770156
					Tcirg1	151.62	213.677	1.40929
					Arpc5l	88.3065	119.551	1.35382
					2010107E04Rik	354.817	494.616	1.394
					B4galnt1	132.184	182.45	1.38027
					Man2a1	99.2185	153.1	1.54306
					Dynlt3	117.459	89.4675	0.761688
					Trem1	375.303	197.374	0.525905
					Nfe2l2	137.114	108.048	0.788015
					Adam15	146.558	104.953	0.716116
					Mfsd7c	97.6232	150.269	1.53927
					Cib2	106.178	71.385	0.672314
					Prdx2	118.269	159.062	1.34492
					Tmcc3	145.475	113.821	0.78241
					Malsu1	80.6808	124.057	1.53763
					Dock10	258.875	189.283	0.731177
					Fermt3	126.305	93.3985	0.739465
					Arhgap30	183.503	138.558	0.755068
					E430025E21Rik	85.0285	118.217	1.39032
					Ddx21	246.834	178.385	0.722696
					Srsf7	82.3923	113.839	1.38167
					Ppt2	123.085	163.888	1.3315
					Qdpr	144.287	199.573	1.38317
					Cox7a2l	107.678	77.3247	0.718111
					Clec5a	98.7338	151.427	1.53369
					Nckap1l	232.208	181.252	0.78056
					Srsf3	185.111	258.962	1.39896
					Slc7a2	1482.48	966.836	0.652173
					Fau	712.713	962.464	1.35042
					Pld3	953.688	717.668	0.752519
					H2-Ab1	1750.08	1066.05	0.609144
					Rock1	175.232	138.294	0.789207
					Tmem86a	204.806	155.817	0.760801
					Far1	96.9385	135.397	1.39673
					Sdha	157.129	212.793	1.35426
					Pkm	569.259	448.851	0.788484
					Lgals3bp	177.819	259.866	1.46141
					Sub1	235.004	305.964	1.30195
					Cybb	2186.9	1600.81	0.732001
					Cers2	206.119	158.225	0.767638
					Grn	910.191	675.668	0.742336
					Fgr	403.207	292.225	0.724753
					Zcchc2	79.0035	113.797	1.44041
					Picalm	837.72	638.201	0.761831
					Ufsp2	112.623	155.739	1.38284
					Arhgdia	402.255	316.787	0.787527
					Cct8	217.688	293.285	1.34727
					Ddx3x	385.718	281.781	0.730536
					Hdlbp	148.744	112.331	0.755197

## Sheet: 6A2 M vs KO M
6A2-Males						KO-Males						common genes between 6A2 vs KO
	average	average	fold				average	average	fold			6A2 Male					KO Male
Associated_Gene_Name	male	Female	m/f			Associated_Gene_Name	male	Female	m/f			Associated_Gene_Name	male	Female	m/f		Associated_Gene_Name	male	Female	m/f
Xist	371.075	1005.57	0.369021	2.70988		Xist	526.585	523.463	1.00596	0.994071		Xist	371.075	1005.57	0.369021		Xist	526.585	523.463	1.00596
Lyz2	12104.3	15057.7	0.803859	1.244		Rpl36al	214.576	809.139	0.26519	3.77088		Gp49a	56.2593	146.365	0.384375		Gp49a	177.939	111.163	1.60069
Fbxw5	97.284	19.36	5.025	0.199005		Cd302	544.712	202.431	2.69085	0.37163		Ndufb5	151.965	63.2495	2.40263		Ndufb5	133.229	205.394	0.648654
Tnni2	20.8448	10.2538	2.03289	0.49191		Uqcc2	36.571	137.463	0.266042	3.7588		Fth1	6546.13	8825.69	0.741714		Fth1	11275.4	19108.9	0.590063
Smap2	70.822	190.123	0.372507	2.68452		Ralgds	1028.44	327.018	3.1449	0.317975		Trem1	81.504	205.086	0.397413		Trem1	375.303	197.374	1.90149
Smarcb1	107.783	29.1092	3.70271	0.270073		Abhd17c	290.729	121.753	2.38786	0.418785		Sub1	302.19	131.458	2.29875		Sub1	235.004	305.964	0.768076
Mgp	23.6018	115.692	0.204005	4.90184		Icosl	176.678	37.6485	4.69282	0.213092		Rcc2	174.398	74.5075	2.34067		Rcc2	129.407	79.3332	1.63118
Pafah1b3	75.6182	18.026	4.19495	0.238382		E130309D02Rik	187.056	68.2278	2.74164	0.364746		H2-Ab1	304.991	631.497	0.482965		H2-Ab1	1750.08	1066.05	1.64165
Trim47	121.085	41.1478	2.9427	0.339824		Lrrk1	104.952	39.5115	2.65623	0.376474		Snrpd3	414.71	171.178	2.42269		Snrpd3	408.846	196.352	2.08221
Nfix	121.992	42.4278	2.87528	0.347792		Rps11	656.696	2443.06	0.268801	3.72022		Stom	110.509	51.588	2.14215		Stom	112.219	69.7493	1.60889
Dusp1	149.407	536.977	0.278238	3.59405		Rpl28	486.17	1293.41	0.375883	2.6604		Id2	182.014	376.464	0.483483		Id2	266.579	174.087	1.5313
Wars	9.75325	71.7023	0.136024	7.35163		Gm10320	91.9943	256.604	0.358507	2.78935		Prkaca	202.002	85.1585	2.37207		Prkaca	209.76	126.249	1.66148
Gp49a	56.2593	146.365	0.384375	2.60163		Sh3tc1	965.94	334.062	2.8915	0.345841		Pltp	128.38	58.105	2.20945		Pltp	105.527	54.6453	1.93112
Ndufb5	151.965	63.2495	2.40263	0.416211		Rps6	43.5205	153.635	0.283272	3.53018		Rps7	50.471	114.781	0.439716		Rps7	415.427	626.109	0.663506
Hcst	63.6788	150.741	0.422439	2.36721		mt-Co1	552.17	1522.47	0.36268	2.75725		Rab11fip1	82.9785	32.519	2.55169		Rab11fip1	105.823	57.5953	1.83735
Ubr2	203.255	90.1643	2.25428	0.443601		Atpif1	296.411	705.594	0.420087	2.38046		H2-Eb1	289.882	611.686	0.473907		H2-Eb1	810.211	445.362	1.81922
Fance	36.6645	119.069	0.307928	3.24751		Atp5j	305.241	993.511	0.307235	3.25484		Pabpc1	1257.78	761.882	1.65088		Pabpc1	609.632	325.983	1.87014
Arl4c	56.4123	10.7782	5.2339	0.191062		Eef1a1	195.919	511.532	0.383004	2.61094		Psmd6	109.289	38.2537	2.85696		Psmd6	78.2668	112.242	0.697302
Rnpepl1	177.619	84.3345	2.10612	0.474806		Serf2	93.1025	217.567	0.427926	2.33685		Sec61b	86.3287	162.054	0.532716		Sec61b	216.829	514.889	0.421118
Cttnbp2nl	112.811	272.653	0.413752	2.41691		Cav2	223.459	87.74	2.54684	0.392644		Jup	146.538	69.5335	2.10744		Jup	215.304	109.32	1.96949
Krt15	115.89	33.0607	3.50537	0.285276		Rpl35	391.389	1096.22	0.357034	2.80085		Lhfpl2	125.893	69.7283	1.80548		Lhfpl2	74.8858	117.014	0.639971
Mylip	70.2145	18.2338	3.8508	0.259686		Hspe1	239.666	715.095	0.335153	2.98371		Chd8	101.092	51.2917	1.97091		Chd8	121.497	71.971	1.68814
Afap1	229.704	99.9705	2.29772	0.435214		Prkag1	253.341	115.266	2.19788	0.454984		Commd3	125.97	65.7905	1.91471		Commd3	77.3135	128.626	0.601072
Txlna	99.8545	29.8903	3.3407	0.299338		Atp5h	160.732	413.785	0.388442	2.57439		Sin3b	458.061	263.98	1.73521		Sin3b	496.865	255.577	1.94409
Mapkapk5	34.2582	4.6465	7.37292	0.135632		Rassf1	132.277	55.227	2.39515	0.41751		Rnf19b	55.158	108.061	0.510434		Rnf19b	153.302	54.2625	2.82519
Rfk	115.14	46.1782	2.49338	0.401062		Dnajc19	34.4145	115.993	0.296694	3.37048		Gng5	110.427	204	0.54131		Gng5	104.076	197.759	0.526276
Timm13	199.527	100.754	1.98034	0.504964		Pabpc4	232.262	85.5362	2.71537	0.368274		Add3	87.6775	45.0938	1.94434		Add3	58.5523	103.965	0.563193
Fth1	6546.13	8825.69	0.741714	1.34823		Cox7a2	347.224	885.24	0.392237	2.54948
Fuca2	74.9943	19.0763	3.93129	0.25437		Rpl10	232.431	864.526	0.268854	3.71949		common	27
Bpifa1	2939.96	1020.44	2.88108	0.347092		Ptbp1	192.455	97.6903	1.97005	0.5076		up regulated in both	2	yellow background
Pou2f1	99.4317	31.5622	3.15034	0.317426		Spi1	1414.95	604.172	2.34197	0.426991		6A2 up-KO down	8	red
Tmod3	110.736	44.9965	2.461	0.406338		Ube2j1	263.638	125.906	2.09392	0.477573		6A2 down-KO up	1	black
Trem1	81.504	205.086	0.397413	2.51627		Gm2962	37.176	150.105	0.247667	4.03769		6A2=KO	16	green
Tpx2	12.1305	56.4	0.21508	4.64944		Zc3h12a	251.18	81.7322	3.07321	0.325393
Dguok	108.196	33.4297	3.23652	0.308974		Myh9	692.495	332.638	2.08183	0.480347			27
Tpm1	138.282	21.4445	6.44836	0.155078		Anapc13	65.7005	162.507	0.404295	2.47344
Fam214a	32.7227	2.80175	11.6794	0.0856209		Hcar2	532.829	126.393	4.21565	0.237211
Sub1	302.19	131.458	2.29875	0.435019		Ndufa5	317.129	725.609	0.437052	2.28806
Rcc2	174.398	74.5075	2.34067	0.427227		Asap1	208.494	104.987	1.9859	0.50355
Sertad3	98.165	33.2245	2.9546	0.338456		Usmg5	287.705	768.689	0.37428	2.67179
Ccdc80	94.464	24.2235	3.89968	0.256431		Rara	108.311	41.2897	2.6232	0.381214
Cyhr1	103.059	29.5145	3.49183	0.286383		Rps13-ps2	225.782	98.357	2.29554	0.435628
Rufy1	61.8353	17.0055	3.63619	0.275013		Cnot1	187.475	72.9095	2.57134	0.388902
Zfand6	143.594	66.4308	2.16156	0.462628		Hmgcl	1052.06	364.734	2.88446	0.346685
Papd4	0.526	14.845	0.0354328	28.2224		Zdhhc9	110.914	47.567	2.33175	0.428862
Cd151	44.9498	111.899	0.4017	2.48942		Gm10288	111.355	53.0117	2.10058	0.47606
Nr3c1	165.537	88.9375	1.86127	0.537267		Ndufb6	115.281	282.3	0.408363	2.4488
B3gnt8	209.686	90.2657	2.32299	0.43048		Trf	1922.07	831.48	2.31162	0.432597
Rgp1	9.75525	46.0388	0.211892	4.71938		Sec61b	216.829	514.889	0.421118	2.37463
Mrpl24	53.2257	11.506	4.62591	0.216174		Snrpd2	64.6552	145.319	0.44492	2.24759
Rpl38-ps1	41.8743	107.588	0.389211	2.5693		Rpl5	180.957	458.008	0.395096	2.53103
Mt2	475.407	1092.03	0.435342	2.29704		Triap1	243.108	115.557	2.10379	0.475333
Fryl	90.5613	30.0075	3.01795	0.33135		Spp1	53.8835	208.334	0.258641	3.86637
Mrpl40	9.39225	54.4822	0.172391	5.80077		Cd82	416.953	175.609	2.37433	0.421172
Stub1	97.7672	42.187	2.31747	0.431504		Fmnl1	135.849	62.9285	2.15878	0.463225
Ilvbl	78.7168	26.2695	2.99651	0.333722		Rpl10a	64.3173	162.66	0.395409	2.52903
Hdac7	43.2843	11.4887	3.76753	0.265426		Myeov2	289.405	604.954	0.478392	2.09034
Kdm5a	123.334	62.2588	1.98099	0.504797		Furin	1077.79	470.467	2.29089	0.436512
Tk2	53.5763	14.1878	3.77623	0.264814		Rpl30	1045	2915.26	0.358458	2.78972
Mt1	883.843	1616.44	0.546784	1.82887		Ndufv3	129.921	268.712	0.483493	2.06828
Erp44	30.9835	92.4487	0.335142	2.98381		Plekho2	561.736	151.288	3.71302	0.269323
Dgat2	32.049	91.4855	0.350318	2.85455		Rpl35a	255.669	623.444	0.410092	2.43848
Pbx1	191.192	100.136	1.90932	0.523746		Minos1	174.699	351.509	0.496996	2.01209
Mob3b	111.365	48.0962	2.31546	0.431879		Prrc2a	103.276	39.1362	2.63888	0.378948
H2-Ab1	304.991	631.497	0.482965	2.07054		Srebf2	231.108	109.807	2.10468	0.475131
Fopnl	63.9892	17.4965	3.65726	0.273429		Rhoa	4520.69	1591.27	2.84093	0.351998
Prune	39.9582	95.4182	0.418769	2.38795		Gm11598	32.4413	103.876	0.312308	3.20197
Snrpd3	414.71	171.178	2.42269	0.412765		Kif1c	141.161	77.275	1.82674	0.547424
AY036118	23.404	80.0643	0.292315	3.42096		Snap29	95.3197	211.871	0.449895	2.22274
Brap	43.337	99.9968	0.433384	2.30742		Fabp5	95.0532	272.151	0.349267	2.86314
Ptprf	81.3067	21.4735	3.78638	0.264105		Jag1	117.469	38.3177	3.06566	0.326194
P4ha1	11.1365	53.357	0.208717	4.79118		Arl6ip5	427.56	165.727	2.57991	0.387611
Stom	110.509	51.588	2.14215	0.466821		Hist1h1c	117.433	327.603	0.358462	2.7897
Gtf2f1	29.8817	99.0435	0.301703	3.31451		Ptk2b	230.796	109.852	2.10097	0.475971
Abcd1	47.4325	11.5667	4.10076	0.243857		Ing1	110.653	44.4495	2.48941	0.401702
Id2	182.014	376.464	0.483483	2.06832		Scand1	104.614	58.7355	1.7811	0.561451
Pnkp	58.8713	13.3837	4.39871	0.227339		Hivep3	716.571	240.246	2.98266	0.335271
Prkaca	202.002	85.1585	2.37207	0.421573		Rps15	279.725	566.33	0.493925	2.0246
Mettl1	17.7812	59.5185	0.298752	3.34726		Prmt1	219.658	91.0588	2.41227	0.414547
Mrps12	55.2398	15.4865	3.56696	0.280351		Polr2f	116.294	245.512	0.473682	2.11112
Socs3	51.0045	127.811	0.399063	2.50587		Memo1	38.8188	123.337	0.314737	3.17725
Lman1	78.352	154.443	0.507319	1.97115		Lypla2	421.818	227.636	1.85304	0.539655
Btg1	197.361	90.1285	2.18978	0.456667		Dync1i2	306.826	161.435	1.90062	0.526144
Mvb12b	43.572	15.6378	2.78633	0.358894		Mfsd5	276.681	147.381	1.87731	0.532676
mt-Nd1	3002.75	4386.68	0.684515	1.46089		Ola1	79.0653	162.665	0.486063	2.05735
Stard3	58.787	127.228	0.46206	2.16422		Ndufs5	29.1978	104.016	0.280704	3.56247
mt-Rnr2	24034.9	29322.9	0.819662	1.22001		Rps23	265.25	561.861	0.472093	2.11823
Sdc4	43.865	8.20925	5.34336	0.187148		Iqsec1	355.526	180.716	1.96732	0.508307
Trim26	28.9263	91.371	0.31658	3.15876		Rps3a1	169.881	390.286	0.435274	2.2974
Ndufa10	130.413	53.0288	2.4593	0.40662		Rps27l	117.737	257.883	0.456553	2.19033
Mad1l1	59.3107	13.4145	4.42139	0.226173		Ap2b1	129.901	60.0345	2.16377	0.462156
Nfkbia	1065.28	1943.68	0.548074	1.82457		Ube2h	133.749	70.0012	1.91066	0.52338
Slc1a5	136.716	53.606	2.55038	0.392098		Mir142hg	123.093	46.5862	2.64227	0.378462
Pltp	128.38	58.105	2.20945	0.452601		Phf1	103.917	41.2022	2.52211	0.396493
Fam114a2	98.3433	45.7518	2.1495	0.465225		Fxr2	183.826	98.7947	1.86069	0.537436
Fkbp5	119.066	282.897	0.420881	2.37597		Dst	189.833	86.9935	2.18215	0.458263
Rps7	50.471	114.781	0.439716	2.2742		Got2	179.951	95.8208	1.878	0.532481
Map3k2	76.7408	38.0062	2.01916	0.495255		Sec61g	70.1815	180.695	0.388397	2.57468
Foxo3	108.38	49.3468	2.19628	0.455314		Tmem11	159.334	87.5312	1.82031	0.549357
Lyrm4	41.5697	107.716	0.38592	2.59121		Snw1	248.592	134.339	1.85047	0.540402
Gdap10	47.1833	12.047	3.9166	0.255324		Aup1	138.341	62.504	2.21331	0.451812
Prdm2	68.802	23.1632	2.97031	0.336665		Rae1	113.97	61.1337	1.86426	0.536404
Trim39	8.79875	41.7392	0.210803	4.74377		B4galt1	1088.14	555.501	1.95885	0.510504
Rap1a	97.1713	36.8445	2.63733	0.379171		Rnf19b	153.302	54.2625	2.82519	0.353958
Abcf2	4.569	34.9377	0.130775	7.6467		Stt3a	65.3307	127.197	0.513618	1.94697
Rab11fip1	82.9785	32.519	2.55169	0.391897		Lfng	103.269	56.1333	1.83971	0.543563
Cyp4v3	46.288	107.043	0.432423	2.31255		Rhoc	721.574	376.248	1.91782	0.521426
Chil3	12065.9	9706.83	1.24303	0.804486		Bst1	323.638	678.261	0.477158	2.09574
Tnfaip8l2	81.3175	29.347	2.7709	0.360894		Fcgr2b	113.174	266.75	0.424271	2.35698
Ap3m1	48.0785	98.8972	0.486146	2.057		Dnajc7	127.838	64.0648	1.99546	0.501138
Set	113.547	56.339	2.01543	0.496172		Rps27a	191.297	386.512	0.494934	2.02047
Gm17066	40.3473	95.8645	0.420878	2.37599		Pet100	51.307	120.457	0.425937	2.34776
Pxk	52.1752	12.0373	4.33448	0.230708		Ier5	511.766	249.01	2.0552	0.486571
Brwd3	36.5365	86.9283	0.420306	2.37922		Gla	107.768	55.996	1.92457	0.519595
H2-Eb1	289.882	611.686	0.473907	2.11012		Ifngr1	255.683	133.861	1.91007	0.523541
Zfp106	143.099	76.9532	1.85956	0.537762		Psma3	96.852	193.922	0.499437	2.00225
Ap1b1	104.421	51.4633	2.02904	0.492844		Slc25a4	142.74	271.707	0.525345	1.90351
Lactb2	6.07	34.5195	0.175843	5.6869		Herpud1	233.39	125.918	1.85351	0.539518
Zcchc17	22.7	67.5105	0.336244	2.97403		Rad23b	319.749	185.168	1.7268	0.579106
Ncoa5	21.7005	73.7043	0.294427	3.39643		Ptpn12	537.44	286.201	1.87784	0.532526
Pip5k1c	60.018	126.268	0.475321	2.10384		Chmp5	51.1545	104.359	0.490179	2.04007
Cbx3	61.5847	21.0595	2.92432	0.34196		Fam129b	787.552	396.339	1.98707	0.503254
Brf1	6.442	39.86	0.161616	6.18752		Lpcat3	549.702	235.446	2.33472	0.428316
Pign	27.139	4.11925	6.58834	0.151783		Sh3pxd2b	765.518	389.529	1.96524	0.508845
Chm	19.9495	65.5695	0.30425	3.28677		U2af2	450.808	216.669	2.08063	0.480624
Thoc3	44.9693	99.77	0.450729	2.21863		Ddx39b	254.322	139.141	1.8278	0.547105
Sppl3	146.747	71.6192	2.04899	0.488046		Dhx9	225.607	505.343	0.446444	2.23992
Paip2	87.4197	34.5705	2.52874	0.395454		Ociad1	350.175	204.309	1.71395	0.583447
Sh3gl1	65.6388	23.9898	2.73612	0.365482		Dgkz	299.134	142.942	2.09269	0.477854
Dapk1	183.689	362.351	0.506935	1.97264		Mrpl20	63.035	131.795	0.478282	2.09082
Ankrd44	144.214	70.7843	2.03738	0.490827		Tpt1	374.363	934.817	0.400467	2.49709
Casp8	66.1758	136.702	0.484088	2.06574		Dbi	789.422	1587.67	0.497221	2.01118
Fbxw7	74.3685	29.5497	2.51672	0.397342		Arf5	439.08	223.064	1.9684	0.508026
Idh3a	34.4605	6.2385	5.52384	0.181033		Zswim8	164.916	88.577	1.86184	0.537103
Csf2rb	1004.17	1577.22	0.636669	1.57067		Rpl6	389.689	740.436	0.526297	1.90007
Ap2a2	141.846	73.0633	1.94141	0.515089		Apbb1ip	434.474	252.916	1.71786	0.58212
Pabpc1	1257.78	761.882	1.65088	0.605737		Ndufa1	504.263	1091.78	0.461872	2.1651
Psmd6	109.289	38.2537	2.85696	0.350023		Rcl1	373.924	133.189	2.80746	0.356193
Ikbkb	177.216	98.423	1.80055	0.555385		Mrps18c	60.8407	175.542	0.346588	2.88527
Akt1	229.554	422.678	0.543096	1.8413		Rps10	947.332	539.925	1.75456	0.569942
Eci2	119.159	236.185	0.504516	1.9821		Mrps21	47.3825	108.632	0.436172	2.29267
Glrx5	109.854	217.889	0.504174	1.98344		Slc25a5	175.149	420.068	0.416953	2.39835
Nr1h3	52.9243	110.672	0.47821	2.09113		Kdm6b	109.821	26.8818	4.08532	0.244779
Sec61b	86.3287	162.054	0.532716	1.87717		Bcl3	160.751	55.981	2.87153	0.348246
Fam50a	64.3147	25.2177	2.55038	0.392099		Rpl41	100.925	196.546	0.513497	1.94743
Slc2a1	10.5913	45.7465	0.23152	4.31927		Hsd17b12	624.653	342.292	1.82491	0.547972
Cndp2	135.647	65.2	2.08047	0.48066		Grina	436.921	211.041	2.07031	0.48302
Hmg20b	86.6015	37.4655	2.3115	0.43262		Aim2	152.633	72.419	2.10763	0.474466
1810030O07Rik	88.6487	40.902	2.16735	0.461394		Lims1	57.2752	119.481	0.479369	2.08608
Nbeal1	100.763	42.0658	2.39536	0.417474		F7	499.978	958.009	0.521893	1.9161
Srpk1	39.241	109.958	0.356873	2.80212		Psmd4	365.16	185.215	1.97155	0.507216
Jup	146.538	69.5335	2.10744	0.474508		Ndufa13	301.806	531.274	0.568079	1.76032
Leprot	150.884	80.9158	1.86471	0.536277		Peli1	180.646	88.8985	2.03205	0.492114
Ppm1g	88.1577	153.277	0.575152	1.73867		Polr2m	99.7548	223.798	0.445736	2.24348
1700020I14Rik	164.1	101.123	1.62278	0.616227		Aldh2	317.683	152.79	2.07921	0.480952
Lhfpl2	125.893	69.7283	1.80548	0.553868		Evl	62.7832	146.971	0.42718	2.34093
Rsl24d1	9.71325	46.6962	0.208009	4.80748		Txn-ps1	59.451	156.084	0.38089	2.62543
Psmc3	248.029	111.325	2.22796	0.44884		Csnk2b	171.882	98.7687	1.74025	0.574631
Taf1	121.82	56.1337	2.17017	0.460794		Sec13	50.5403	100.339	0.503694	1.98533
Safb2	111.769	53.7225	2.08048	0.480659		Eif2s2	351.207	188.637	1.86181	0.537111
Ino80d	139.472	50.8062	2.74517	0.364276		Psma4	64.3595	154.238	0.417275	2.3965
Dnttip2	43.9565	11.94	3.68145	0.271632		Socs2	156.269	67.9838	2.29863	0.435042
Snx12	57.284	122.666	0.466991	2.14137		Ubc	2580.15	961.772	2.68271	0.372758
Chd8	101.092	51.2917	1.97091	0.507379		Mark2	191.698	87.5215	2.19029	0.45656
Commd3	125.97	65.7905	1.91471	0.522273		Pabpc1	609.632	325.983	1.87014	0.53472
Nsmce2	31.765	74.337	0.427311	2.34022		Drap1	152.944	91.0945	1.67896	0.595608
Snord118	62.9085	24.2172	2.59767	0.38496		Spen	110.799	63.0722	1.7567	0.569249
Sin3b	458.061	263.98	1.73521	0.576299		Npc1	181.32	110.696	1.638	0.610501
Basp1	79.6227	153.721	0.517968	1.93062		Atp6v1a	269.823	478.839	0.563495	1.77464
Slc41a3	88.4398	39.9123	2.21585	0.451293		Glrx3	58.791	114.01	0.515668	1.93923
Eid2b	7.325	34.222	0.214044	4.67195		Rela	378.976	217.955	1.73878	0.575117
Hmbox1	41.0915	10.6695	3.85131	0.259652		Pip5k1a	136.461	67.6252	2.0179	0.495564
Cd44	3399.77	4436.52	0.766314	1.30495		Polr2k	30.0292	102.944	0.291705	3.42812
Pqlc2	11.151	42.5862	0.261845	3.81905		Amdhd2	88.5478	163.467	0.541687	1.84609
Rnf19b	55.158	108.061	0.510434	1.95912		Rps16	614.465	1117.22	0.549996	1.8182
Aldh1b1	17.8513	59.401	0.300521	3.32755		Dnaja2	182.186	114.917	1.58537	0.630767
Gng5	110.427	204	0.54131	1.84737		Rps4x	144.769	280.36	0.516367	1.93661
Tbc1d9b	116.102	62.5225	1.85696	0.538515		Cap1	119.087	63.5755	1.87316	0.533858
Pkn2	95.8945	38.23	2.50836	0.398667		Snrpd3	408.846	196.352	2.08221	0.480259
Sbk1	25.6675	5.01625	5.11687	0.195432		Spcs3	79.6275	225.976	0.352372	2.83791
Kdelr1	400.589	664.268	0.603053	1.65823		Prpf8	162.081	97.261	1.66645	0.600077
Nolc1	48.534	98.4122	0.49317	2.0277		Arpc3	1010.06	554.845	1.82043	0.549321
Hilpda	31.9965	81.4952	0.392618	2.54701		Gnai2	1088.6	626.074	1.73878	0.575116
Creb1	105.662	42.8625	2.46515	0.405655		Jdp2	104.32	36.616	2.84903	0.350996
Zmym4	54.356	19.3128	2.81451	0.355301		2510039O18Rik	122.774	69.8465	1.75777	0.568902
Add3	87.6775	45.0938	1.94434	0.514314		Rpl38-ps2	135.515	241.07	0.562139	1.77892
Galnt6	88.519	42.1358	2.10081	0.476008		Eef1b2	605.011	1143.15	0.529247	1.88948
Pfn1	334.104	167.391	1.99595	0.501014		Marveld1	163.276	94.7392	1.72342	0.580242
Prkx	69.7212	29.4365	2.36853	0.422203		Arhgef2	185.129	105.664	1.75206	0.570758
Lman2l	49.5022	16.834	2.94061	0.340065		Stx16	69.8425	124.049	0.563022	1.77613
Ahcyl1	38.085	94.397	0.403456	2.47859		Clic1	781.86	379.704	2.05913	0.485643
Lpgat1	76.9287	31.7948	2.41954	0.413301		Ino80b	25.9968	11.598	2.24149	0.446133
Sft2d2	86.4183	42.921	2.01343	0.496666		Ndufa4	73.979	171.818	0.430567	2.32252
Mbp	69.2562	135.433	0.51137	1.95553		Ftl1	1154.93	2646.44	0.436408	2.29143
Tpt1-ps3	29.9393	5.6035	5.34296	0.187162		Lrp1	714.821	431.562	1.65636	0.603735
Mmp8	16.1425	86.6845	0.186221	5.36996		Rpl18a	128.754	246.384	0.522572	1.91361
						Atf4	352.309	185.392	1.90035	0.52622
						Tap2	276.924	108.946	2.54185	0.393415
						Tmem258	261.979	544.317	0.481299	2.07771
						R3hdm4	123.149	58.9228	2.09001	0.478466
						Ssh2	111.817	59.7835	1.87036	0.534657
						Tmem63a	116.582	69.23	1.68399	0.593828
						Aldoc	44.58	102.621	0.434414	2.30195
						Hnrnpa2b1	244.947	560.658	0.436892	2.2889
						Tcf25	428.569	266.529	1.60796	0.621905
						Cd74	704.118	322.809	2.18122	0.45846
						Stk40	138.89	78.0993	1.77838	0.562309
						Fnip1	117.463	61.3012	1.91617	0.521875
						Tmem50a	833.604	472.398	1.76462	0.566694
						Pycard	63.9557	126.043	0.50741	1.97079
						Gripap1	118.075	67.948	1.73772	0.575466
						Chd8	121.497	71.971	1.68814	0.592367
						Rpl38	558.69	965.777	0.578487	1.72865
						Nf2	103.492	60.2463	1.71781	0.582136
						Hspd1	58.3312	112.386	0.519028	1.92668
						Psap	3428.4	7479.63	0.458364	2.18167
						Rpl37a	3372.59	6925.63	0.486973	2.0535
						Btk	228.634	111.212	2.05583	0.48642
						Fus	2409.7	1166.51	2.06573	0.48409
						Plekhg1	212.034	128.144	1.65466	0.604354
						Atp5f1	101.053	189.853	0.532268	1.87875
						Spcs1	138.32	238.653	0.579588	1.72536
						Ehd1	820.473	370.421	2.21497	0.451473
						Atp5a1	591.273	1071.87	0.551627	1.81282
						Sin3b	496.865	255.577	1.94409	0.51438
						Magoh	233.853	152.139	1.5371	0.650575
						Ccdc47	90.2608	203.339	0.443892	2.2528
						Anxa1	190.023	436.132	0.4357	2.29516
						Rab11b	147.279	86.4732	1.70317	0.587141
						Cisd2	63.23	110.701	0.57118	1.75076
						Tmed3	81.4333	156.59	0.52004	1.92293
						Tmem167	99.5303	193.931	0.513224	1.94847
						Snrpe	192.053	347.096	0.553315	1.80729
						43532	117.238	215.399	0.544284	1.83728
						Rps12	227.614	454.664	0.500621	1.99752
						43710	92.116	166.772	0.552349	1.81045
						Arpp19	333.107	581.604	0.57274	1.74599
						Add3	58.5523	103.965	0.563193	1.77559
						Gde1	180.897	111.672	1.61989	0.617325
						Slc48a1	465.265	261.782	1.7773	0.562652
						Dynlrb1	115.32	215.37	0.53545	1.86759
						Ppp1r18	320.365	199.567	1.6053	0.622936
						Sec24c	55.873	102.364	0.545825	1.83209
						Sema4a	247.442	145.585	1.69964	0.588361
						2410015M20Rik	118.862	206.186	0.576481	1.73466
						Golga2	133.571	82.704	1.61505	0.619176
						Rps25	2874.72	1639.69	1.75321	0.570382
						Psme1	261.264	175.89	1.48539	0.673226
						Setd8	265.31	152.108	1.74422	0.573321
						Abracl	233.467	440.526	0.529973	1.88689
						Psme2b	74.1243	132.323	0.560178	1.78515
						Gm5963	375.963	248.771	1.51128	0.661691
						Cisd1	64.5105	119.737	0.538769	1.85608
						Ak2	217.644	125.704	1.7314	0.577567
						Baz2b	147.218	90.7823	1.62166	0.616651
						Chmp4b	1382.33	813.325	1.6996	0.588374
						Nmt1	215.114	133.972	1.60567	0.622795
						Eif3j2	105.212	52.4195	2.00711	0.498229
						Riok3	225.939	138.847	1.62725	0.614533
						Tspo	181.632	359.074	0.505834	1.97693
						Rtfdc1	145.632	88.8345	1.63936	0.609993
						Etfa	56.6803	128.624	0.440666	2.26929
						Urm1	132.791	78.3023	1.69588	0.589664
						Tle3	127.748	77.156	1.6557	0.603973
						Fam120a	251.026	163.881	1.53176	0.652845
						Acap2	97.0793	179.881	0.539686	1.85293
						1810022K09Rik	128.132	249.155	0.514265	1.94452
						Myd88	223.756	132.45	1.68936	0.591939
						Ndufs4	80.3852	137.143	0.586143	1.70607
						Trappc1	94.1692	171.242	0.549921	1.81844
						Anxa2	6479.17	3516.63	1.84244	0.542759
						Mcoln3	63.9635	144.147	0.443738	2.25358
						Notch2	137.744	274.039	0.502642	1.98949
						Tceb1	89.1243	212.673	0.419068	2.38625
						Btf3	37.2215	100.874	0.368988	2.71011
						Fabp4	414.801	824.474	0.503109	1.98764
						Actn1	709.667	458.515	1.54775	0.6461
						Btbd9	111.709	58.6937	1.90325	0.525416
						Idh3g	124.589	71.8713	1.73351	0.576866
						Ski	243.807	155.381	1.56909	0.637312
						Uqcrq	236.194	386.341	0.611362	1.63569
						Flna	1279.74	792.734	1.61434	0.619448
						Rin3	138.066	74.8417	1.84477	0.542072
						Spryd3	166.856	103.035	1.61942	0.617505
						Cox8a	404.616	723.757	0.55905	1.78875
						Ndufb2	62.88	137.723	0.456569	2.19025
						Hr	140.192	55.107	2.54399	0.393083
						Rnf10	387.003	208.84	1.8531	0.539636
						Eny2	54.8798	108.391	0.506314	1.97506
						Cebpa	949.655	424.294	2.2382	0.446787
						Ndufab1	58.7945	108.346	0.542655	1.84279
						Prpf19	101.828	167.939	0.606335	1.64925
						Rnf6	124.893	68.9898	1.81031	0.552392
						Bola2	300.871	481.058	0.625436	1.59888
						Eml2	169.45	82.8272	2.04582	0.488802
						Ddx24	250.138	143.72	1.74045	0.574563
						Sec63	165.969	108.218	1.53364	0.652041
						Ctsa	1471.02	910.432	1.61574	0.618912
						Ctsl	241.813	466.905	0.517907	1.93085
						Gnl1	111.117	71.3547	1.55724	0.64216
						Selt	71.204	137.615	0.517415	1.93269
						Huwe1	135.13	83.9672	1.60932	0.62138
						Uqcrb	125.265	226.155	0.553889	1.80541
						Cflar	285.801	139.805	2.04428	0.489169
						Ear2	403.867	804.343	0.502109	1.9916
						Srsf5	206.234	112.364	1.83542	0.544835
						Gm6265	66.0482	125.685	0.525506	1.90293
						Mdh2	334.986	214.394	1.56248	0.640008
						Gak	170.421	111.085	1.53415	0.651827
						Commd3	77.3135	128.626	0.601072	1.66369
						Jagn1	134.629	77.5135	1.73684	0.575757
						Taok3	167.863	98.0418	1.71216	0.584059
						Nxf1	60.6423	115.251	0.526177	1.9005
						Eif4h	189.764	325.144	0.58363	1.71341
						Tagln2	3779.93	2201.14	1.71726	0.582324
						Atrnl1	51.7375	121.013	0.427538	2.33898
						Irf5	168.796	97.985	1.72267	0.580493
						Lcp2	174.666	96.9032	1.80248	0.554793
						Fam21	113.781	76.5853	1.48567	0.673096
						Msn	886.571	562.048	1.57739	0.633957
						Acin1	119.561	72.077	1.6588	0.602847
						Rpl22	534.312	906.746	0.589263	1.69703
						Mpdu1	308.412	189.464	1.62782	0.614319
						S100a10	397.689	697.102	0.570488	1.75288
						Pdia6	224.986	350.409	0.642067	1.55747
						Srp14	218.988	354.221	0.618225	1.61753
						Rps27	565.995	967.519	0.584997	1.70941
						Wfdc21	1265.55	2692.78	0.469981	2.12775
						Fam105a	81.559	168.736	0.483353	2.06888
						Becn1	153.301	102.215	1.4998	0.666757
						Stom	112.219	69.7493	1.60889	0.621547
						Ctsc	535.654	968.795	0.552907	1.80862
						Slc38a1	153.01	102.446	1.49357	0.669536
						Ppp3r1	430.996	267.091	1.61367	0.619706
						Uba1	253.979	168.995	1.50288	0.665388
						Psmd13	285.211	181.33	1.57288	0.635776
						Ptms	460.407	296.436	1.55314	0.643856
						Nfkbib	180.343	92.9385	1.94046	0.515343
						Cnih4	82.2283	139.442	0.589693	1.6958
						Dohh	115.069	66.4813	1.73084	0.577754
						Mkks	62.6295	120.008	0.521877	1.91616
						Spag9	119.763	73.4103	1.63142	0.612964
						Srxn1	177.375	106.215	1.66995	0.598819
						Ufc1	80.0748	136.889	0.584959	1.70952
						Dync1h1	221.868	143.586	1.5452	0.647166
						Snord89	114.767	25.3795	4.52205	0.221139
						Ndufc1	120.496	213.334	0.564826	1.77046
						AI662270	115.167	68.2127	1.68835	0.592296
						Rab11fip1	105.823	57.5953	1.83735	0.544262
						Iqgap1	2463.99	1576.62	1.56283	0.639864
						Atp6v0d2	641.176	1117.01	0.574009	1.74213
						Atp13a2	91.7722	150.911	0.60812	1.64441
						Stk38	210.867	123.378	1.70912	0.585097
						Erp29	149.801	232.663	0.643856	1.55314
						Eif3i	165.833	249.759	0.663971	1.50609
						Zbtb22	108.102	65.9015	1.64036	0.609623
						Prkaca	209.76	126.249	1.66148	0.601875
						Cln5	257.807	166.848	1.54516	0.647182
						Ets2	209.028	70.0675	2.98324	0.335206
						Azin1	74.8785	120.858	0.619559	1.61405
						Atp5g2	54.2165	118.185	0.458743	2.17987
						Uhmk1	94.761	158.456	0.598028	1.67216
						Smarcc2	225.85	113.619	1.98778	0.503073
						Ly75	360.636	227.89	1.5825	0.631911
						Fbxl14	87.4762	198.706	0.440231	2.27154
						Pttg1	101.198	66.7843	1.5153	0.659936
						2310047M10Rik	173.279	106.906	1.62085	0.61696
						Ppm1a	165.066	107.281	1.53863	0.649929
						Vat1	491.273	318.76	1.5412	0.648844
						Unc119	322.051	212.856	1.513	0.66094
						Vasp	1444.57	852.315	1.69488	0.590013
						Rps2	158.564	278.992	0.568347	1.75949
						Wasf2	127.307	83.9363	1.51671	0.659322
						Bax	104.455	61.714	1.69257	0.590818
						Flot2	170.77	109.984	1.55268	0.644046
						Rpl39	1114.54	2013.32	0.553582	1.80642
						Setd5	205.912	125.631	1.63902	0.610121
						Pla2g16	75.2177	140.384	0.535799	1.86637
						Kctd10	109.125	70.8383	1.54048	0.649148
						Spn	50.7165	102.928	0.492739	2.02947
						Gng5	104.076	197.759	0.526276	1.90014
						Cd274	177.192	83.7225	2.11642	0.472496
						Rcc2	129.407	79.3332	1.63118	0.613052
						Pdia3	908.644	469.692	1.93455	0.516916
						Slc7a5	238.205	129.714	1.83638	0.544548
						Ctsk	769.175	1601.02	0.480429	2.08147
						Acaa1b	424.653	201.548	2.10695	0.474619
						Pltp	105.527	54.6453	1.93112	0.517833
						Hmgcs1	121.603	195.24	0.622841	1.60555
						Ndufv2	84.6925	141.938	0.596688	1.67592
						Slc38a10	219.766	148.936	1.47557	0.677705
						2310011J03Rik	124.128	79.869	1.55415	0.643438
						Plec	591.832	361.81	1.63575	0.611339
						Glyr1	228.673	421.75	0.5422	1.84434
						Sirt2	359.034	254.216	1.41232	0.708056
						Krtcap2	232.146	364.04	0.637695	1.56815
						Axl	804.608	535.335	1.503	0.665337
						Capn1	232.826	125.019	1.86232	0.536966
						D8Ertd738e	93.9743	152.251	0.617231	1.62014
						Rsl1d1	217.382	143.765	1.51207	0.661347
						Anapc5	164.992	108.383	1.5223	0.656901
						Cltc	442.226	302.2	1.46335	0.683362
						Ppp1r9b	163.647	109.772	1.49078	0.670788
						Hsdl1	104.534	173.172	0.603644	1.65661
						Skil	156.51	95.0877	1.64596	0.60755
						Rassf5	123.028	80.279	1.5325	0.652528
						Lmnb1	356.356	120.545	2.9562	0.338272
						Exosc5	114.504	77.658	1.47447	0.678209
						Npepps	113.257	75.5408	1.49928	0.666985
						Eif3h	364.396	231.617	1.57327	0.635618
						Lcp1	1418.62	933.536	1.51962	0.658061
						Atp6v1g1	170.647	283.683	0.60154	1.6624
						Adrbk1	294.092	211.121	1.393	0.717874
						Actl6a	129.446	88.7215	1.45901	0.685397
						Kpnb1	103.044	178.52	0.577215	1.73246
						Pcnxl3	139.145	58.6095	2.37411	0.42121
						4930506M07Rik	321.407	202.121	1.59017	0.628865
						Rpl27	871.094	1414.93	0.615644	1.62432
						Apoa1bp	110.605	74.317	1.48828	0.671915
						Cd300lf	1235.45	603.716	2.04642	0.488659
						Klf13	465.657	314.341	1.48138	0.675048
						Ncln	291.674	188.199	1.54982	0.645238
						Zbtb7a	550.256	373.031	1.4751	0.677922
						Sdhc	143.051	229.918	0.622181	1.60725
						Cox5b	146.29	224.687	0.651084	1.5359
						Gm22710	536.368	220.795	2.42926	0.411649
						Diap2	254.609	160.404	1.5873	0.63
						Cpt1a	177.609	289.534	0.61343	1.63018
						Tcp1	99.2215	162.766	0.609594	1.64044
						Pip4k2c	129.26	86.2095	1.49936	0.666949
						Psma1	103.848	169.532	0.612558	1.6325
						Rabl6	105.553	64.2618	1.64254	0.608813
						Crip1	190.854	444.356	0.429508	2.32825
						Hebp1	190.632	332.228	0.573797	1.74278
						Slc12a7	121.543	80.6855	1.50638	0.663842
						Rab8a	353.186	234.053	1.50901	0.662688
						1810037I17Rik	299.657	600.125	0.499324	2.00271
						Pik3cd	166.571	99.7103	1.67055	0.598606
						Gatad2a	124.996	87.409	1.43002	0.699292
						Pea15a	116.842	77.6538	1.50465	0.664605
						Syk	554.614	353.507	1.56889	0.637392
						Stk24	388.366	258.469	1.50257	0.665528
						Jak2	112.384	59.7275	1.88161	0.531459
						Ifrd1	965.206	497.192	1.94131	0.515115
						Cox14	103.073	154.276	0.668108	1.49676
						Shfm1	740.105	1281.83	0.577381	1.73196
						Mapkapk3	197.731	128.539	1.53829	0.650072
						Rpl14	490.28	320.676	1.5289	0.654067
						Tnfrsf21	231.653	140.975	1.64322	0.608562
						Uxs1	182.64	116.469	1.56815	0.637693
						D17Wsu92e	378.502	268.544	1.40946	0.709492
						Cox7b	283.428	455.24	0.622592	1.60619
						Ctbp1	221.145	156.06	1.41705	0.705692
						Cd200r4	70.3155	112.036	0.627617	1.59333
						Map2k3	268.438	183.068	1.46633	0.681974
						Ctss	4608.74	8404.72	0.548351	1.82365
						Vps72	129.037	67.3398	1.91621	0.521864
						Zfp36	202.57	90.0775	2.24884	0.444673
						Mgat4b	288.297	201.211	1.43281	0.697929
						Atf6b	167.546	112.672	1.48702	0.672485
						Rbms1	548.707	390.71	1.40438	0.712056
						Dynll1	59.6213	101.496	0.587428	1.70234
						Rnf7	61.403	108.941	0.563635	1.7742
						Fn1	566.618	995.266	0.569313	1.7565
						Rpn2	176.906	271.561	0.65144	1.53506
						Coro1a	325.871	191.813	1.6989	0.588618
						Ube2z	162.04	248.038	0.653289	1.53072
						Yeats4	179.723	126.788	1.41751	0.705464
						Rbx1	70.8153	112.973	0.626833	1.59532
						Kmt2e	162.641	116.695	1.39372	0.717503
						Junb	496.691	230.738	2.15261	0.464551
						Eif3e	85.811	153.084	0.560549	1.78396
						Ube2d3	332.213	223.772	1.4846	0.67358
						Capns1	408.204	293.616	1.39027	0.719287
						Gcnt2	130.196	210.704	0.617907	1.61837
						Rpl36	231.287	383.03	0.603835	1.65608
						Sap30l	102.659	65.4073	1.56954	0.63713
						Bak1	121.817	85.156	1.43051	0.69905
						Txn1	1808.15	3087.14	0.585704	1.70735
						Rnf220	126.828	86.638	1.46388	0.683115
						Snx5	524.27	339.227	1.54548	0.647046
						Plaur	152.549	83.5445	1.82596	0.547657
						Pim3	127.514	73.3893	1.73751	0.575537
						Prcp	158.71	105.336	1.50671	0.6637
						Abhd12	1078.97	699.012	1.54356	0.647852
						Csnk1g2	246.611	172.925	1.42612	0.701204
						Dnajb11	66.724	116.882	0.570869	1.75172
						Aff1	105.231	69.0182	1.52468	0.655877
						Rmnd5a	64.9022	121.716	0.533228	1.87537
						Ppp3ca	199.295	305.564	0.65222	1.53323
						Csde1	469.418	332.087	1.41354	0.707443
						Mpeg1	866.298	1404.45	0.616823	1.62121
						Gsk3b	154.324	101.886	1.51467	0.660211
						2510009E07Rik	57.2137	101.169	0.565525	1.76827
						Rps28	1404.56	2203.22	0.637503	1.56862
						Ndufa3	226.322	333.253	0.679129	1.47247
						Jup	215.304	109.32	1.96949	0.507747
						Slirp	124.899	187.145	0.66739	1.49837
						Supt6	108.789	71.3102	1.52557	0.655493
						Ccdc115	218.702	153.524	1.42454	0.701979
						Fam168b	118.734	177.588	0.668593	1.49568
						Ccnl1	110.031	67.4378	1.6316	0.612895
						Gabarap	2105.88	1420.45	1.48255	0.674515
						Tubb4b	59.2332	100.536	0.589176	1.69729
						Uqcrfs1	287.255	453.607	0.633268	1.57911
						Snd1	118.877	82.227	1.44572	0.691695
						Znfx1	65.1755	101.906	0.639563	1.56357
						Rps18	356.965	526.714	0.67772	1.47553
						Cmip	216.38	152.969	1.41453	0.706947
						Pik3r1	111.552	71.0685	1.56964	0.637087
						Ndufb5	133.229	205.394	0.648654	1.54165
						Pafah1b1	221.397	326.743	0.677589	1.47582
						Tonsl	439.23	305.096	1.43965	0.694615
						Phb2	325.647	234.051	1.39135	0.718726
						Brd4	148.79	96.6128	1.54007	0.649322
						Tapbp	526.427	352.986	1.49135	0.670532
						Atf5	183.983	105.558	1.74296	0.573736
						Rsrp1	105.888	196.281	0.539473	1.85366
						Mapkapk2	854.339	520.654	1.6409	0.609423
						Pigt	271.427	156.043	1.73943	0.574901
						Id2	266.579	174.087	1.5313	0.65304
						Scap	182.36	119.66	1.52398	0.656175
						Cic	115.311	80.1245	1.43914	0.694857
						Isg15	288.971	119.329	2.42164	0.412943
						Cpne5	111.409	65.181	1.70923	0.585059
						Stk17b	86.7027	141.221	0.61395	1.6288
						Hpcal1	450.718	277.776	1.62259	0.616297
						Pbxip1	240.963	162.841	1.47974	0.675793
						Actn4	250.431	177.768	1.40875	0.709849
						Cct2	134.402	200.622	0.669929	1.49269
						Tnfaip2	1528.72	938.758	1.62844	0.614083
						Ccnd2	1860.31	1013.14	1.83618	0.54461
						Fam96a	91.893	144.222	0.637164	1.56946
						Copb2	102.937	71.7043	1.43558	0.696584
						9130401M01Rik	83.8695	133.103	0.630107	1.58703
						Rab1	242.9	377.594	0.643282	1.55453
						Arhgef7	109.993	66.665	1.64993	0.606087
						Hsp90ab1	1697.95	1021.62	1.66203	0.601675
						Pex11a	325.763	203.045	1.60439	0.62329
						Mbnl2	109.286	68.5233	1.59487	0.62701
						Ap3d1	137.018	206.358	0.663984	1.50606
						Magt1	85.654	133.549	0.641365	1.55917
						Fam129a	246.712	151.936	1.62379	0.615843
						BC031181	99.8815	143.81	0.69454	1.4398
						Chmp1a	230.286	158.83	1.4499	0.689705
						Tnip1	275.8	136.693	2.01767	0.495622
						Tmx1	171.856	243.902	0.70461	1.41922
						Nr4a1	215.039	70.3642	3.05608	0.327217
						Cops5	149.804	104.669	1.43122	0.698703
						AI413582	122.187	82.7495	1.47659	0.677238
						Mxd1	233.518	66.6553	3.50337	0.28544
						Tgfbr2	137.444	231.34	0.594118	1.68317
						Fbxl5	113.835	179.393	0.634557	1.5759
						Pqlc3	61.761	115.654	0.534015	1.87261
						Rpl23	980.488	1635.19	0.599617	1.66773
						Klc1	225.983	144.212	1.56702	0.638155
						H2-K1	1569.84	1005.34	1.5615	0.640411
						Psmc1	237.986	156.585	1.51985	0.657959
						Bsg	268.429	199.52	1.34537	0.743288
						Rbm17	81.4315	147.119	0.553507	1.80666
						Ms4a6d	211.407	326.26	0.64797	1.54328
						Eif5b	269.144	198.039	1.35904	0.735811
						Tpp2	67.9047	115.733	0.586738	1.70434
						Hdgf	344.645	239.028	1.44186	0.693548
						Nucb1	74.154	112.079	0.661621	1.51144
						Itgax	977.618	631.208	1.5488	0.64566
						Rpl31	962.326	1536.57	0.626283	1.59672
						Pfkfb4	172.41	126.002	1.36831	0.730827
						Actr1b	119.198	81.594	1.46087	0.684523
						Arl8b	110.824	166.068	0.667341	1.49849
						Tsc22d4	103.231	69.3533	1.48847	0.671829
						Naaa	290.851	479.946	0.606009	1.65014
						Rpl36a	1234.06	2047.15	0.60282	1.65887
						Fkbp2	144.917	227.007	0.638382	1.56646
						Zfp703	199.577	118.369	1.68606	0.593099
						Saraf	326.706	236.792	1.37972	0.724785
						Vapb	346.01	242.571	1.42643	0.701051
						Ddb1	568.413	409.919	1.38665	0.721165
						Mmp8	69.414	141.066	0.492069	2.03223
						Ndufb3	227.744	380.267	0.598907	1.66971
						Ear1	1200.25	701.42	1.71118	0.584393
						Ndufb9	137.862	205.227	0.671754	1.48864
						Nop58	98.7318	153.018	0.645232	1.54983
						Elovl1	158.145	110.727	1.42824	0.700161
						Trib1	192.613	93.1015	2.06885	0.483361
						Tkt	659.673	427.929	1.54155	0.648699
						Tnf	100.154	44.8855	2.23132	0.448166
						Skiv2l	67.175	109.61	0.612853	1.63171
						Slc7a1	105.091	63.6963	1.64988	0.606106
						Tardbp	69.624	116.187	0.59924	1.66878
						Smarcd2	120.585	82.9507	1.45369	0.687903
						Hyou1	110.123	61.653	1.78618	0.559855
						Hmox1	144.613	92.33	1.56626	0.638465
						Atp6v1f	1002.71	697.605	1.43737	0.695717
						Rpl9	318.808	468.36	0.68069	1.4691
						Psmb4	237.124	350.53	0.676473	1.47825
						Rpl13a	690.875	1062.51	0.650229	1.53792
						Sec22b	113.38	81.8347	1.38547	0.721774
						Polr2g	68.1825	106.8	0.638416	1.56638
						Sdf4	189.889	140.328	1.35318	0.739001
						Rsu1	97.1637	147.202	0.66007	1.51499
						Cox6b1	635.028	959.323	0.661954	1.51068
						Pmepa1	195.152	124.531	1.5671	0.638123
						Polr2a	183.985	135.718	1.35564	0.737658
						Rnh1	1358.49	963.104	1.41053	0.708952
						Ccnk	123.507	187.89	0.65734	1.52128
						Qsox1	937.338	593.054	1.58053	0.6327
						Nagpa	196.077	143.553	1.36589	0.732123
						Irf8	136.845	94.2043	1.45264	0.6884
						Hnrnpl	170	115.993	1.46561	0.682309
						Grpel1	204.963	134.861	1.51981	0.657976
						Card11	105.246	74.0393	1.4215	0.703484
						Adam17	537.158	346.401	1.55068	0.644876
						Lima1	766.382	482.322	1.58894	0.62935
						Vcp	303.67	201.746	1.50521	0.664358
						Srp9	75.3915	135.214	0.55757	1.7935
						Hsd3b7	127.526	199.363	0.639666	1.56332
						Ncor2	179.81	119.48	1.50494	0.664477
						Rpl22l1	75.794	124.903	0.606822	1.64793
						Mertk	372.732	245.469	1.51845	0.658566
						C77080	69.336	117.477	0.59021	1.69431
						Stk10	112.688	196.316	0.574015	1.74212
						Purb	312.487	227.607	1.37292	0.728372
						Mtdh	563.66	376.7	1.49631	0.66831
						Calm2	177.257	264.63	0.669831	1.49291
						Eif1ax	83.7302	124.85	0.670645	1.4911
						Sqstm1	718.443	492.596	1.45848	0.685644
						Swi5	278.007	182.842	1.52048	0.657687
						Rpl37	1998.91	3192.47	0.626132	1.59711
						Tpd52l2	73.4335	112.192	0.654534	1.5278
						Fnta	129.529	185.767	0.697268	1.43417
						Mapre1	334.756	243.106	1.377	0.726218
						Stat6	118.912	86.2168	1.37922	0.725045
						Plek	1440.86	842.166	1.7109	0.584487
						Isoc2a	389.956	266.521	1.46314	0.683464
						Slc39a11	151.725	102.372	1.4821	0.67472
						Chmp2a	200.119	305.707	0.654608	1.52763
						Sae1	259.555	170.529	1.52206	0.657005
						Atp6ap1	1032.82	739.854	1.39598	0.716344
						Emd	195.461	137.938	1.41702	0.705705
						Mfsd12	230.37	155.506	1.48143	0.675025
						Pfkfb3	121.651	69.7347	1.74449	0.573234
						Srp19	71.01	108.787	0.652743	1.532
						Nabp1	165.946	270.986	0.612378	1.63298
						Hck	593.209	377.3	1.57225	0.636033
						Mpc2	124.069	206.648	0.600384	1.6656
						Lhfpl2	74.8858	117.014	0.639971	1.56257
						Rtcb	141.653	106.491	1.33018	0.751777
						S100a11	526.694	355.828	1.48019	0.675589
						Tm9sf4	166.801	99.8113	1.67117	0.598383
						Irf1	175.645	96.873	1.81314	0.551528
						Actb	13132.1	8168.34	1.60768	0.622014
						Pim1	345.244	188.928	1.82738	0.547232
						Atg3	77.5182	120.816	0.641625	1.55854
						Cux1	102.123	69.7583	1.46395	0.683084
						Atxn1	157.713	112.208	1.40554	0.711471
						Rrs1	67.8377	124.041	0.546898	1.8285
						P2ry14	408.208	276.199	1.47795	0.676613
						Itpr2	208.002	146.86	1.41633	0.706051
						Nfkb2	108.002	61.904	1.74466	0.573177
						Cbfb	115.107	168.185	0.684406	1.46112
						Bcl2a1d	171.973	348.869	0.492944	2.02863
						Anp32a	156.504	98.0652	1.59591	0.6266
						Naca	150.72	249.178	0.604869	1.65325
						Rpl3	769.672	1135.6	0.677769	1.47543
						Higd2a	136.042	103.348	1.31635	0.759679
						Taok1	149.71	107.556	1.39193	0.718425
						Crlf2	302.333	231.664	1.30505	0.766253
						Atp6v1e1	520.16	383.972	1.35468	0.73818
						Batf	108.378	70.3402	1.54077	0.649027
						Tnfrsf1b	243.474	156.392	1.55682	0.642336
						Rab5c	2786.89	1879.19	1.48303	0.674296
						Mgst1	186.462	296.938	0.627951	1.59248
						Hsbp1	108.52	163.421	0.664055	1.5059
						Acaa1a	199.452	149.602	1.33322	0.750062
						Lamtor1	288.989	187.481	1.54143	0.648748
						43723	117.525	193.165	0.608416	1.64361
						Sumo3	320.005	227.206	1.40844	0.710007
						Gtf2h5	120.656	173.722	0.694534	1.43981
						Tuba1c	561.35	387.354	1.44919	0.690041
						Cotl1	4070.33	2796.34	1.45559	0.687006
						Rps7	415.427	626.109	0.663506	1.50715
						Snrpb2	160.268	117.006	1.36974	0.730067
						Lrp10	173.302	123.77	1.40019	0.714187
						St13	299.835	226.228	1.32537	0.754506
						Sec11a	97.3817	141.365	0.688865	1.45166
						Rps29	1772.04	1236.54	1.43306	0.697808
						Pebp1	91.1192	132.844	0.685913	1.45791
						Myl12b	259.955	185.209	1.40357	0.712467
						Sidt2	125.326	94.0933	1.33194	0.750785
						Ergic1	150.084	108.459	1.38379	0.722651
						Rpl18	225.567	323.747	0.69674	1.43526
						Tnfaip8	152.778	108.504	1.40804	0.710206
						Ndufb10	100.837	155.438	0.64873	1.54147
						Ifitm2	130.598	56.3528	2.31751	0.431497
						Cox7c	225.274	319.103	0.705959	1.41651
						Rplp0	704.875	1022.74	0.689202	1.45095
						Rplp2	993.263	1451.28	0.684403	1.46113
						Fam49b	316.121	220.394	1.43435	0.697182
						Itpripl2	316.854	230.321	1.37571	0.7269
						Psmb5	161.65	225.005	0.718428	1.39193
						Gba	126.009	181.66	0.693656	1.44164
						Gab2	262.672	178.617	1.47059	0.68
						Gar1	73.5457	114.211	0.643946	1.55292
						Esrra	81.7627	119.431	0.684602	1.4607
						Ddost	176.872	133.481	1.32507	0.754677
						Zfp770	14.7745	7.835	1.88571	0.530306
						Usp14	139.339	105.662	1.31872	0.758309
						Eif4b	104.297	149.428	0.697975	1.43272
						Ndufa6	214.606	307.828	0.69716	1.43439
						Hvcn1	246.763	361.71	0.682213	1.46582
						Mbnl1	255.685	192.972	1.32498	0.754727
						Ehbp1l1	152.985	115.097	1.32918	0.752341
						H2-DMb1	695.379	481.517	1.44414	0.692452
						Bhlhe40	134.375	90.1515	1.49055	0.670895
						Actr10	145.373	112.326	1.2942	0.772676
						Arl2bp	99.1532	169.349	0.585498	1.70795
						Gas5	236.435	347.968	0.679474	1.47173
						Pgrmc2	117.022	84.8245	1.37958	0.724856
						Abhd16a	127.401	92.4903	1.37745	0.725977
						Tyrobp	1656.32	2449.06	0.676309	1.47861
						Chtf8	202.05	125.801	1.60611	0.622623
						Cdc42ep3	98.8893	166.85	0.592685	1.68724
						Mgat1	225.685	176.601	1.27794	0.782509
						Ufd1l	104.358	80.2295	1.30074	0.768793
						Ddx50	66.806	102.05	0.654638	1.52756
						Atp6v0a1	133.051	92.0433	1.44553	0.691789
						Mob1a	184.415	288.951	0.638222	1.56685
						Mdm2	134.821	96.5247	1.39675	0.715946
						Atp6ap2	649.543	490.394	1.32453	0.754984
						Gpcpd1	184.247	299.127	0.615949	1.62351
						Hsd17b4	91.7097	142.918	0.641696	1.55837
						H2-Eb1	810.211	445.362	1.81922	0.549686
						Col4a3bp	90.2825	127.375	0.708796	1.41084
						Psmd6	78.2668	112.242	0.697302	1.4341
						Stx6	137.982	105.757	1.30472	0.76645
						Arhgap1	106.237	74.986	1.41675	0.70584
						Sp1	137.627	102.475	1.34303	0.744586
						Snrnp70	329.282	459.4	0.716766	1.39515
						Ddx6	485.125	349.065	1.38979	0.719535
						Ubb	284.471	210.377	1.3522	0.739538
						Fam32a	119.474	80.4485	1.4851	0.673356
						Coro1c	700.299	1025.91	0.682615	1.46495
						Gp49a	177.939	111.163	1.60069	0.62473
						Higd1a	97.3482	136.446	0.713455	1.40163
						Sec61a1	650.218	477.41	1.36197	0.734231
						Ppig	121.973	86.1172	1.41636	0.706035
						Atp10a	141.138	99.1905	1.4229	0.70279
						Ythdf3	101.323	75.049	1.35009	0.740692
						Pdcd6	77.6308	115.704	0.670943	1.49044
						Hdc	373.147	74.67	4.99727	0.200109
						Acads	209.739	158.501	1.32327	0.755705
						Rab31	124.199	93.5695	1.32734	0.753385
						Jak1	264.956	203.226	1.30375	0.76702
						Csf1r	370.984	253.803	1.4617	0.684136
						Wipf1	97.869	132.978	0.735976	1.35874
						Ndufc2	132.494	188.688	0.702184	1.42413
						Smdt1	167.662	234.452	0.715126	1.39836
						Edf1	182.304	132.025	1.38082	0.724205
						Soat1	72.0508	102.439	0.703351	1.42177
						Ier3	728.099	262.386	2.77491	0.360372
						Mgrn1	112.565	86.2608	1.30494	0.766319
						Ccl9	1044.24	520.549	2.00603	0.498497
						Marco	1334.49	2384.62	0.559625	1.78691
						Rps24	2695.03	1821.55	1.47952	0.675893
						Ube2j2	124.118	95.4897	1.29981	0.769345
						Pcbp1	190.016	258.006	0.73648	1.35781
						Ssbp4	147.496	104.183	1.41574	0.706346
						Zranb2	75.8265	107.025	0.708493	1.41145
						2310036O22Rik	160.476	121.184	1.32423	0.755154
						Hspa4	188.404	283.267	0.665109	1.50351
						Vav1	166.212	229.004	0.725808	1.37778
						Rnf13	70.312	107.936	0.651422	1.5351
						Eef2	2514.79	1797.83	1.39879	0.714902
						Rpl12	334.596	468.552	0.714106	1.40035
						Kdelr2	68.8417	102.008	0.674865	1.48178
						Tmem189	69.55	103.614	0.671238	1.48978
						Anxa4	340.292	259.685	1.3104	0.763125
						Fth1	11275.4	19108.9	0.590063	1.69473
						Ewsr1	107.425	167.154	0.642667	1.55601
						Snrpf	78.4555	140.78	0.557292	1.79439
						Emc7	122.767	186.745	0.657401	1.52114
						Ncor1	152.204	107.189	1.41997	0.704242
						Dstn	264.475	180.534	1.46495	0.682615
						Fas	252.566	140.337	1.79971	0.555645
						Canx	339.544	463.361	0.732785	1.36466
						Per1	202.036	116.518	1.73394	0.576722
						Bub1b	165.379	113.238	1.46045	0.68472
						Tmem109	129.69	99.5855	1.30229	0.767876
						Rps20	1944.48	1409.43	1.37962	0.724836
						Sptlc2	116.305	160.726	0.723622	1.38194
						Tmbim6	1200.64	879.357	1.36536	0.732408
						Hexa	505.064	721.332	0.700183	1.4282
						Cwc15	255.088	196.041	1.30119	0.768525
						Hnrnpa0	617.525	477.754	1.29256	0.773659
						Abcf1	129.946	101.331	1.2824	0.77979
						Zfp706	111.411	153.697	0.724873	1.37955
						Bud31	103.642	77.4537	1.33811	0.747324
						Ankrd11	158.858	109.338	1.45291	0.688273
						Atp5c1	76.223	109.769	0.694393	1.44011
						Ccdc88a	260.093	179.576	1.44837	0.690429
						Wbp11	68.7905	100.687	0.683211	1.46368
						Cd24a	141.741	229.755	0.616924	1.62094
						Nampt	432.411	304.702	1.41913	0.704657
						Hsd17b11	277.601	399.691	0.694539	1.4398
						Aamp	282.631	215.803	1.30967	0.763549
						Mllt6	190.865	114.694	1.66412	0.600918
						Hnrnpul2	221.794	160.687	1.38029	0.724488
						Creg1	580.703	441.134	1.31639	0.759655
						Pa2g4	192.208	148.03	1.29844	0.770156
						Tcirg1	151.62	213.677	0.709577	1.40929
						Arpc5l	88.3065	119.551	0.738651	1.35382
						2010107E04Rik	354.817	494.616	0.717359	1.394
						B4galnt1	132.184	182.45	0.724496	1.38027
						Man2a1	99.2185	153.1	0.648062	1.54306
						Dynlt3	117.459	89.4675	1.31287	0.761688
						Trem1	375.303	197.374	1.90149	0.525905
						Nfe2l2	137.114	108.048	1.26901	0.788015
						Adam15	146.558	104.953	1.39642	0.716116
						Mfsd7c	97.6232	150.269	0.649658	1.53927
						Cib2	106.178	71.385	1.4874	0.672314
						Prdx2	118.269	159.062	0.743541	1.34492
						Tmcc3	145.475	113.821	1.2781	0.78241
						Malsu1	80.6808	124.057	0.650351	1.53763
						Dock10	258.875	189.283	1.36766	0.731177
						Fermt3	126.305	93.3985	1.35233	0.739465
						Arhgap30	183.503	138.558	1.32438	0.755068
						E430025E21Rik	85.0285	118.217	0.719258	1.39032
						Ddx21	246.834	178.385	1.38371	0.722696
						Srsf7	82.3923	113.839	0.723764	1.38167
						Ppt2	123.085	163.888	0.751035	1.3315
						Qdpr	144.287	199.573	0.722979	1.38317
						Cox7a2l	107.678	77.3247	1.39254	0.718111
						Clec5a	98.7338	151.427	0.652024	1.53369
						Nckap1l	232.208	181.252	1.28113	0.78056
						Srsf3	185.111	258.962	0.714819	1.39896
						Slc7a2	1482.48	966.836	1.53334	0.652173
						Fau	712.713	962.464	0.740509	1.35042
						Pld3	953.688	717.668	1.32887	0.752519
						H2-Ab1	1750.08	1066.05	1.64165	0.609144
						Rock1	175.232	138.294	1.2671	0.789207
						Tmem86a	204.806	155.817	1.3144	0.760801
						Far1	96.9385	135.397	0.715958	1.39673
						Sdha	157.129	212.793	0.738412	1.35426
						Pkm	569.259	448.851	1.26826	0.788484
						Lgals3bp	177.819	259.866	0.684273	1.46141
						Sub1	235.004	305.964	0.768076	1.30195
						Cybb	2186.9	1600.81	1.36612	0.732001
						Cers2	206.119	158.225	1.3027	0.767638
						Grn	910.191	675.668	1.3471	0.742336
						Fgr	403.207	292.225	1.37978	0.724753
						Zcchc2	79.0035	113.797	0.694246	1.44041
						Picalm	837.72	638.201	1.31263	0.761831
						Ufsp2	112.623	155.739	0.723148	1.38284
						Arhgdia	402.255	316.787	1.2698	0.787527
						Cct8	217.688	293.285	0.74224	1.34727
						Ddx3x	385.718	281.781	1.36886	0.730536
						Hdlbp	148.744	112.331	1.32416	0.755197

## Sheet: 6A2 F vs KO F
6A2-Females					KO-Females					common genes between 6A2 vs KO
	average	average	fold			average	average	fold		6A2 Female					KO Female						6A2 Male	6A2 Female	KO male	KO Female
Associated_Gene_Name	male	Female	F/M		Associated_Gene_Name	male	Female	F/M		Associated_Gene_Name	male	Female	F/M		Associated_Gene_Name	male	Female	F/M		Xist	0.369021	2.70988	1.00596	0.994071
Xist	371.075	1005.57	2.70988		Xist	526.585	523.463	0.994071		Xist	371.075	1005.57	2.70988		Xist	526.585	523.463	0.994071		Gp49a	0.384375	2.60163	1.60069	0.62473
Lyz2	12104.3	15057.7	1.244		Rpl36al	214.576	809.139	3.77088		Gp49a	56.2593	146.365	2.60163		Gp49a	177.939	111.163	0.62473		Ndufb5	2.40263	0.416211	0.648654	1.54165
Fbxw5	97.284	19.36	0.199005		Cd302	544.712	202.431	0.37163		Ndufb5	151.965	63.2495	0.416211		Ndufb5	133.229	205.394	1.54165		Fth1	0.741714	1.34823	0.590063	1.69473
Tnni2	20.8448	10.2538	0.49191		Uqcc2	36.571	137.463	3.7588		Fth1	6546.13	8825.69	1.34823		Fth1	11275.4	19108.9	1.69473		Trem1	0.397413	2.51627	1.90149	0.525905
Smap2	70.822	190.123	2.68452		Ralgds	1028.44	327.018	0.317975		Trem1	81.504	205.086	2.51627		Trem1	375.303	197.374	0.525905		Sub1	2.29875	0.435019	0.768076	1.30195
Smarcb1	107.783	29.1092	0.270073		Abhd17c	290.729	121.753	0.418785		Sub1	302.19	131.458	0.435019		Sub1	235.004	305.964	1.30195		Rcc2	2.34067	0.427227	1.63118	0.613052
Mgp	23.6018	115.692	4.90184		Icosl	176.678	37.6485	0.213092		Rcc2	174.398	74.5075	0.427227		Rcc2	129.407	79.3332	0.613052		H2-Ab1	0.482965	2.07054	1.64165	0.609144
Pafah1b3	75.6182	18.026	0.238382		E130309D02Rik	187.056	68.2278	0.364746		H2-Ab1	304.991	631.497	2.07054		H2-Ab1	1750.08	1066.05	0.609144		Snrpd3	2.42269	0.412765	2.08221	0.480259
Trim47	121.085	41.1478	0.339824		Lrrk1	104.952	39.5115	0.376474		Snrpd3	414.71	171.178	0.412765		Snrpd3	408.846	196.352	0.480259		Stom	2.14215	0.466821	1.60889	0.621547
Nfix	121.992	42.4278	0.347792		Rps11	656.696	2443.06	3.72022		Stom	110.509	51.588	0.466821		Stom	112.219	69.7493	0.621547		Id2	0.483483	2.06832	1.5313	0.65304
Dusp1	149.407	536.977	3.59405		Rpl28	486.17	1293.41	2.6604		Id2	182.014	376.464	2.06832		Id2	266.579	174.087	0.65304		Prkaca	2.37207	0.421573	1.66148	0.601875
Wars	9.75325	71.7023	7.35163		Gm10320	91.9943	256.604	2.78935		Prkaca	202.002	85.1585	0.421573		Prkaca	209.76	126.249	0.601875		Pltp	2.20945	0.452601	1.93112	0.517833
Gp49a	56.2593	146.365	2.60163		Sh3tc1	965.94	334.062	0.345841		Pltp	128.38	58.105	0.452601		Pltp	105.527	54.6453	0.517833		Rps7	0.439716	2.2742	0.663506	1.50715
Ndufb5	151.965	63.2495	0.416211		Rps6	43.5205	153.635	3.53018		Rps7	50.471	114.781	2.2742		Rps7	415.427	626.109	1.50715		Rab11fip1	2.55169	0.391897	1.83735	0.544262
Hcst	63.6788	150.741	2.36721		mt-Co1	552.17	1522.47	2.75725		Rab11fip1	82.9785	32.519	0.391897		Rab11fip1	105.823	57.5953	0.544262		H2-Eb1	0.473907	2.11012	1.81922	0.549686
Ubr2	203.255	90.1643	0.443601		Atpif1	296.411	705.594	2.38046		H2-Eb1	289.882	611.686	2.11012		H2-Eb1	810.211	445.362	0.549686		Pabpc1	1.65088	0.605737	1.87014	0.53472
Fance	36.6645	119.069	3.24751		Atp5j	305.241	993.511	3.25484		Pabpc1	1257.78	761.882	0.605737		Pabpc1	609.632	325.983	0.53472		Psmd6	2.85696	0.350023	0.697302	1.4341
Arl4c	56.4123	10.7782	0.191062		Eef1a1	195.919	511.532	2.61094		Psmd6	109.289	38.2537	0.350023		Psmd6	78.2668	112.242	1.4341		Sec61b	0.532716	1.87717	0.421118	2.37463
Rnpepl1	177.619	84.3345	0.474806		Serf2	93.1025	217.567	2.33685		Sec61b	86.3287	162.054	1.87717		Sec61b	216.829	514.889	2.37463		Jup	2.10744	0.474508	1.96949	0.507747
Cttnbp2nl	112.811	272.653	2.41691		Cav2	223.459	87.74	0.392644		Jup	146.538	69.5335	0.474508		Jup	215.304	109.32	0.507747		Lhfpl2	1.80548	0.553868	0.639971	1.56257
Krt15	115.89	33.0607	0.285276		Rpl35	391.389	1096.22	2.80085		Lhfpl2	125.893	69.7283	0.553868		Lhfpl2	74.8858	117.014	1.56257		Chd8	1.97091	0.507379	1.68814	0.592367
Mylip	70.2145	18.2338	0.259686		Hspe1	239.666	715.095	2.98371		Chd8	101.092	51.2917	0.507379		Chd8	121.497	71.971	0.592367		Commd3	1.91471	0.522273	0.601072	1.66369
Afap1	229.704	99.9705	0.435214		Prkag1	253.341	115.266	0.454984		Commd3	125.97	65.7905	0.522273		Commd3	77.3135	128.626	1.66369		Sin3b	1.73521	0.576299	1.94409	0.51438
Txlna	99.8545	29.8903	0.299338		Atp5h	160.732	413.785	2.57439		Sin3b	458.061	263.98	0.576299		Sin3b	496.865	255.577	0.51438		Rnf19b	0.510434	1.95912	2.82519	0.353958
Mapkapk5	34.2582	4.6465	0.135632		Rassf1	132.277	55.227	0.41751		Rnf19b	55.158	108.061	1.95912		Rnf19b	153.302	54.2625	0.353958		Gng5	0.54131	1.84737	0.526276	1.90014
Rfk	115.14	46.1782	0.401062		Dnajc19	34.4145	115.993	3.37048		Gng5	110.427	204	1.84737		Gng5	104.076	197.759	1.90014		Add3	1.94434	0.514314	0.563193	1.77559
Timm13	199.527	100.754	0.504964		Pabpc4	232.262	85.5362	0.368274		Add3	87.6775	45.0938	0.514314		Add3	58.5523	103.965	1.77559
Fth1	6546.13	8825.69	1.34823		Cox7a2	347.224	885.24	2.54948
Fuca2	74.9943	19.0763	0.25437		Rpl10	232.431	864.526	3.71949		common	27
Bpifa1	2939.96	1020.44	0.347092		Ptbp1	192.455	97.6903	0.5076		up regulated in both	0	yellow background
Pou2f1	99.4317	31.5622	0.317426		Spi1	1414.95	604.172	0.426991		6A2 up-KO down	7	red
Tmod3	110.736	44.9965	0.406338		Ube2j1	263.638	125.906	0.477573		6A2 down-KO up	1	black
Trem1	81.504	205.086	2.51627		Gm2962	37.176	150.105	4.03769		6A2=KO	19	green
Tpx2	12.1305	56.4	4.64944		Zc3h12a	251.18	81.7322	0.325393
Dguok	108.196	33.4297	0.308974		Myh9	692.495	332.638	0.480347			27
Tpm1	138.282	21.4445	0.155078		Anapc13	65.7005	162.507	2.47344
Fam214a	32.7227	2.80175	0.0856209		Hcar2	532.829	126.393	0.237211
Sub1	302.19	131.458	0.435019		Ndufa5	317.129	725.609	2.28806
Rcc2	174.398	74.5075	0.427227		Asap1	208.494	104.987	0.50355
Sertad3	98.165	33.2245	0.338456		Usmg5	287.705	768.689	2.67179
Ccdc80	94.464	24.2235	0.256431		Rara	108.311	41.2897	0.381214
Cyhr1	103.059	29.5145	0.286383		Rps13-ps2	225.782	98.357	0.435628
Rufy1	61.8353	17.0055	0.275013		Cnot1	187.475	72.9095	0.388902
Zfand6	143.594	66.4308	0.462628		Hmgcl	1052.06	364.734	0.346685
Papd4	0.526	14.845	28.2224		Zdhhc9	110.914	47.567	0.428862
Cd151	44.9498	111.899	2.48942		Gm10288	111.355	53.0117	0.47606
Nr3c1	165.537	88.9375	0.537267		Ndufb6	115.281	282.3	2.4488
B3gnt8	209.686	90.2657	0.43048		Trf	1922.07	831.48	0.432597
Rgp1	9.75525	46.0388	4.71938		Sec61b	216.829	514.889	2.37463
Mrpl24	53.2257	11.506	0.216174		Snrpd2	64.6552	145.319	2.24759
Rpl38-ps1	41.8743	107.588	2.5693		Rpl5	180.957	458.008	2.53103
Mt2	475.407	1092.03	2.29704		Triap1	243.108	115.557	0.475333
Fryl	90.5613	30.0075	0.33135		Spp1	53.8835	208.334	3.86637
Mrpl40	9.39225	54.4822	5.80077		Cd82	416.953	175.609	0.421172
Stub1	97.7672	42.187	0.431504		Fmnl1	135.849	62.9285	0.463225
Ilvbl	78.7168	26.2695	0.333722		Rpl10a	64.3173	162.66	2.52903
Hdac7	43.2843	11.4887	0.265426		Myeov2	289.405	604.954	2.09034
Kdm5a	123.334	62.2588	0.504797		Furin	1077.79	470.467	0.436512
Tk2	53.5763	14.1878	0.264814		Rpl30	1045	2915.26	2.78972
Mt1	883.843	1616.44	1.82887		Ndufv3	129.921	268.712	2.06828
Erp44	30.9835	92.4487	2.98381		Plekho2	561.736	151.288	0.269323
Dgat2	32.049	91.4855	2.85455		Rpl35a	255.669	623.444	2.43848
Pbx1	191.192	100.136	0.523746		Minos1	174.699	351.509	2.01209
Mob3b	111.365	48.0962	0.431879		Prrc2a	103.276	39.1362	0.378948
H2-Ab1	304.991	631.497	2.07054		Srebf2	231.108	109.807	0.475131
Fopnl	63.9892	17.4965	0.273429		Rhoa	4520.69	1591.27	0.351998
Prune	39.9582	95.4182	2.38795		Gm11598	32.4413	103.876	3.20197
Snrpd3	414.71	171.178	0.412765		Kif1c	141.161	77.275	0.547424
AY036118	23.404	80.0643	3.42096		Snap29	95.3197	211.871	2.22274
Brap	43.337	99.9968	2.30742		Fabp5	95.0532	272.151	2.86314
Ptprf	81.3067	21.4735	0.264105		Jag1	117.469	38.3177	0.326194
P4ha1	11.1365	53.357	4.79118		Arl6ip5	427.56	165.727	0.387611
Stom	110.509	51.588	0.466821		Hist1h1c	117.433	327.603	2.7897
Gtf2f1	29.8817	99.0435	3.31451		Ptk2b	230.796	109.852	0.475971
Abcd1	47.4325	11.5667	0.243857		Ing1	110.653	44.4495	0.401702
Id2	182.014	376.464	2.06832		Scand1	104.614	58.7355	0.561451
Pnkp	58.8713	13.3837	0.227339		Hivep3	716.571	240.246	0.335271
Prkaca	202.002	85.1585	0.421573		Rps15	279.725	566.33	2.0246
Mettl1	17.7812	59.5185	3.34726		Prmt1	219.658	91.0588	0.414547
Mrps12	55.2398	15.4865	0.280351		Polr2f	116.294	245.512	2.11112
Socs3	51.0045	127.811	2.50587		Memo1	38.8188	123.337	3.17725
Lman1	78.352	154.443	1.97115		Lypla2	421.818	227.636	0.539655
Btg1	197.361	90.1285	0.456667		Dync1i2	306.826	161.435	0.526144
Mvb12b	43.572	15.6378	0.358894		Mfsd5	276.681	147.381	0.532676
mt-Nd1	3002.75	4386.68	1.46089		Ola1	79.0653	162.665	2.05735
Stard3	58.787	127.228	2.16422		Ndufs5	29.1978	104.016	3.56247
mt-Rnr2	24034.9	29322.9	1.22001		Rps23	265.25	561.861	2.11823
Sdc4	43.865	8.20925	0.187148		Iqsec1	355.526	180.716	0.508307
Trim26	28.9263	91.371	3.15876		Rps3a1	169.881	390.286	2.2974
Ndufa10	130.413	53.0288	0.40662		Rps27l	117.737	257.883	2.19033
Mad1l1	59.3107	13.4145	0.226173		Ap2b1	129.901	60.0345	0.462156
Nfkbia	1065.28	1943.68	1.82457		Ube2h	133.749	70.0012	0.52338
Slc1a5	136.716	53.606	0.392098		Mir142hg	123.093	46.5862	0.378462
Pltp	128.38	58.105	0.452601		Phf1	103.917	41.2022	0.396493
Fam114a2	98.3433	45.7518	0.465225		Fxr2	183.826	98.7947	0.537436
Fkbp5	119.066	282.897	2.37597		Dst	189.833	86.9935	0.458263
Rps7	50.471	114.781	2.2742		Got2	179.951	95.8208	0.532481
Map3k2	76.7408	38.0062	0.495255		Sec61g	70.1815	180.695	2.57468
Foxo3	108.38	49.3468	0.455314		Tmem11	159.334	87.5312	0.549357
Lyrm4	41.5697	107.716	2.59121		Snw1	248.592	134.339	0.540402
Gdap10	47.1833	12.047	0.255324		Aup1	138.341	62.504	0.451812
Prdm2	68.802	23.1632	0.336665		Rae1	113.97	61.1337	0.536404
Trim39	8.79875	41.7392	4.74377		B4galt1	1088.14	555.501	0.510504
Rap1a	97.1713	36.8445	0.379171		Rnf19b	153.302	54.2625	0.353958
Abcf2	4.569	34.9377	7.6467		Stt3a	65.3307	127.197	1.94697
Rab11fip1	82.9785	32.519	0.391897		Lfng	103.269	56.1333	0.543563
Cyp4v3	46.288	107.043	2.31255		Rhoc	721.574	376.248	0.521426
Chil3	12065.9	9706.83	0.804486		Bst1	323.638	678.261	2.09574
Tnfaip8l2	81.3175	29.347	0.360894		Fcgr2b	113.174	266.75	2.35698
Ap3m1	48.0785	98.8972	2.057		Dnajc7	127.838	64.0648	0.501138
Set	113.547	56.339	0.496172		Rps27a	191.297	386.512	2.02047
Gm17066	40.3473	95.8645	2.37599		Pet100	51.307	120.457	2.34776
Pxk	52.1752	12.0373	0.230708		Ier5	511.766	249.01	0.486571
Brwd3	36.5365	86.9283	2.37922		Gla	107.768	55.996	0.519595
H2-Eb1	289.882	611.686	2.11012		Ifngr1	255.683	133.861	0.523541
Zfp106	143.099	76.9532	0.537762		Psma3	96.852	193.922	2.00225
Ap1b1	104.421	51.4633	0.492844		Slc25a4	142.74	271.707	1.90351
Lactb2	6.07	34.5195	5.6869		Herpud1	233.39	125.918	0.539518
Zcchc17	22.7	67.5105	2.97403		Rad23b	319.749	185.168	0.579106
Ncoa5	21.7005	73.7043	3.39643		Ptpn12	537.44	286.201	0.532526
Pip5k1c	60.018	126.268	2.10384		Chmp5	51.1545	104.359	2.04007
Cbx3	61.5847	21.0595	0.34196		Fam129b	787.552	396.339	0.503254
Brf1	6.442	39.86	6.18752		Lpcat3	549.702	235.446	0.428316
Pign	27.139	4.11925	0.151783		Sh3pxd2b	765.518	389.529	0.508845
Chm	19.9495	65.5695	3.28677		U2af2	450.808	216.669	0.480624
Thoc3	44.9693	99.77	2.21863		Ddx39b	254.322	139.141	0.547105
Sppl3	146.747	71.6192	0.488046		Dhx9	225.607	505.343	2.23992
Paip2	87.4197	34.5705	0.395454		Ociad1	350.175	204.309	0.583447
Sh3gl1	65.6388	23.9898	0.365482		Dgkz	299.134	142.942	0.477854
Dapk1	183.689	362.351	1.97264		Mrpl20	63.035	131.795	2.09082
Ankrd44	144.214	70.7843	0.490827		Tpt1	374.363	934.817	2.49709
Casp8	66.1758	136.702	2.06574		Dbi	789.422	1587.67	2.01118
Fbxw7	74.3685	29.5497	0.397342		Arf5	439.08	223.064	0.508026
Idh3a	34.4605	6.2385	0.181033		Zswim8	164.916	88.577	0.537103
Csf2rb	1004.17	1577.22	1.57067		Rpl6	389.689	740.436	1.90007
Ap2a2	141.846	73.0633	0.515089		Apbb1ip	434.474	252.916	0.58212
Pabpc1	1257.78	761.882	0.605737		Ndufa1	504.263	1091.78	2.1651
Psmd6	109.289	38.2537	0.350023		Rcl1	373.924	133.189	0.356193
Ikbkb	177.216	98.423	0.555385		Mrps18c	60.8407	175.542	2.88527
Akt1	229.554	422.678	1.8413		Rps10	947.332	539.925	0.569942
Eci2	119.159	236.185	1.9821		Mrps21	47.3825	108.632	2.29267
Glrx5	109.854	217.889	1.98344		Slc25a5	175.149	420.068	2.39835
Nr1h3	52.9243	110.672	2.09113		Kdm6b	109.821	26.8818	0.244779
Sec61b	86.3287	162.054	1.87717		Bcl3	160.751	55.981	0.348246
Fam50a	64.3147	25.2177	0.392099		Rpl41	100.925	196.546	1.94743
Slc2a1	10.5913	45.7465	4.31927		Hsd17b12	624.653	342.292	0.547972
Cndp2	135.647	65.2	0.48066		Grina	436.921	211.041	0.48302
Hmg20b	86.6015	37.4655	0.43262		Aim2	152.633	72.419	0.474466
1810030O07Rik	88.6487	40.902	0.461394		Lims1	57.2752	119.481	2.08608
Nbeal1	100.763	42.0658	0.417474		F7	499.978	958.009	1.9161
Srpk1	39.241	109.958	2.80212		Psmd4	365.16	185.215	0.507216
Jup	146.538	69.5335	0.474508		Ndufa13	301.806	531.274	1.76032
Leprot	150.884	80.9158	0.536277		Peli1	180.646	88.8985	0.492114
Ppm1g	88.1577	153.277	1.73867		Polr2m	99.7548	223.798	2.24348
1700020I14Rik	164.1	101.123	0.616227		Aldh2	317.683	152.79	0.480952
Lhfpl2	125.893	69.7283	0.553868		Evl	62.7832	146.971	2.34093
Rsl24d1	9.71325	46.6962	4.80748		Txn-ps1	59.451	156.084	2.62543
Psmc3	248.029	111.325	0.44884		Csnk2b	171.882	98.7687	0.574631
Taf1	121.82	56.1337	0.460794		Sec13	50.5403	100.339	1.98533
Safb2	111.769	53.7225	0.480659		Eif2s2	351.207	188.637	0.537111
Ino80d	139.472	50.8062	0.364276		Psma4	64.3595	154.238	2.3965
Dnttip2	43.9565	11.94	0.271632		Socs2	156.269	67.9838	0.435042
Snx12	57.284	122.666	2.14137		Ubc	2580.15	961.772	0.372758
Chd8	101.092	51.2917	0.507379		Mark2	191.698	87.5215	0.45656
Commd3	125.97	65.7905	0.522273		Pabpc1	609.632	325.983	0.53472
Nsmce2	31.765	74.337	2.34022		Drap1	152.944	91.0945	0.595608
Snord118	62.9085	24.2172	0.38496		Spen	110.799	63.0722	0.569249
Sin3b	458.061	263.98	0.576299		Npc1	181.32	110.696	0.610501
Basp1	79.6227	153.721	1.93062		Atp6v1a	269.823	478.839	1.77464
Slc41a3	88.4398	39.9123	0.451293		Glrx3	58.791	114.01	1.93923
Eid2b	7.325	34.222	4.67195		Rela	378.976	217.955	0.575117
Hmbox1	41.0915	10.6695	0.259652		Pip5k1a	136.461	67.6252	0.495564
Cd44	3399.77	4436.52	1.30495		Polr2k	30.0292	102.944	3.42812
Pqlc2	11.151	42.5862	3.81905		Amdhd2	88.5478	163.467	1.84609
Rnf19b	55.158	108.061	1.95912		Rps16	614.465	1117.22	1.8182
Aldh1b1	17.8513	59.401	3.32755		Dnaja2	182.186	114.917	0.630767
Gng5	110.427	204	1.84737		Rps4x	144.769	280.36	1.93661
Tbc1d9b	116.102	62.5225	0.538515		Cap1	119.087	63.5755	0.533858
Pkn2	95.8945	38.23	0.398667		Snrpd3	408.846	196.352	0.480259
Sbk1	25.6675	5.01625	0.195432		Spcs3	79.6275	225.976	2.83791
Kdelr1	400.589	664.268	1.65823		Prpf8	162.081	97.261	0.600077
Nolc1	48.534	98.4122	2.0277		Arpc3	1010.06	554.845	0.549321
Hilpda	31.9965	81.4952	2.54701		Gnai2	1088.6	626.074	0.575116
Creb1	105.662	42.8625	0.405655		Jdp2	104.32	36.616	0.350996
Zmym4	54.356	19.3128	0.355301		2510039O18Rik	122.774	69.8465	0.568902
Add3	87.6775	45.0938	0.514314		Rpl38-ps2	135.515	241.07	1.77892
Galnt6	88.519	42.1358	0.476008		Eef1b2	605.011	1143.15	1.88948
Pfn1	334.104	167.391	0.501014		Marveld1	163.276	94.7392	0.580242
Prkx	69.7212	29.4365	0.422203		Arhgef2	185.129	105.664	0.570758
Lman2l	49.5022	16.834	0.340065		Stx16	69.8425	124.049	1.77613
Ahcyl1	38.085	94.397	2.47859		Clic1	781.86	379.704	0.485643
Lpgat1	76.9287	31.7948	0.413301		Ino80b	25.9968	11.598	0.446133
Sft2d2	86.4183	42.921	0.496666		Ndufa4	73.979	171.818	2.32252
Mbp	69.2562	135.433	1.95553		Ftl1	1154.93	2646.44	2.29143
Tpt1-ps3	29.9393	5.6035	0.187162		Lrp1	714.821	431.562	0.603735
Mmp8	16.1425	86.6845	5.36996		Rpl18a	128.754	246.384	1.91361
					Atf4	352.309	185.392	0.52622
					Tap2	276.924	108.946	0.393415
					Tmem258	261.979	544.317	2.07771
					R3hdm4	123.149	58.9228	0.478466
					Ssh2	111.817	59.7835	0.534657
					Tmem63a	116.582	69.23	0.593828
					Aldoc	44.58	102.621	2.30195
					Hnrnpa2b1	244.947	560.658	2.2889
					Tcf25	428.569	266.529	0.621905
					Cd74	704.118	322.809	0.45846
					Stk40	138.89	78.0993	0.562309
					Fnip1	117.463	61.3012	0.521875
					Tmem50a	833.604	472.398	0.566694
					Pycard	63.9557	126.043	1.97079
					Gripap1	118.075	67.948	0.575466
					Chd8	121.497	71.971	0.592367
					Rpl38	558.69	965.777	1.72865
					Nf2	103.492	60.2463	0.582136
					Hspd1	58.3312	112.386	1.92668
					Psap	3428.4	7479.63	2.18167
					Rpl37a	3372.59	6925.63	2.0535
					Btk	228.634	111.212	0.48642
					Fus	2409.7	1166.51	0.48409
					Plekhg1	212.034	128.144	0.604354
					Atp5f1	101.053	189.853	1.87875
					Spcs1	138.32	238.653	1.72536
					Ehd1	820.473	370.421	0.451473
					Atp5a1	591.273	1071.87	1.81282
					Sin3b	496.865	255.577	0.51438
					Magoh	233.853	152.139	0.650575
					Ccdc47	90.2608	203.339	2.2528
					Anxa1	190.023	436.132	2.29516
					Rab11b	147.279	86.4732	0.587141
					Cisd2	63.23	110.701	1.75076
					Tmed3	81.4333	156.59	1.92293
					Tmem167	99.5303	193.931	1.94847
					Snrpe	192.053	347.096	1.80729
					43532	117.238	215.399	1.83728
					Rps12	227.614	454.664	1.99752
					43710	92.116	166.772	1.81045
					Arpp19	333.107	581.604	1.74599
					Add3	58.5523	103.965	1.77559
					Gde1	180.897	111.672	0.617325
					Slc48a1	465.265	261.782	0.562652
					Dynlrb1	115.32	215.37	1.86759
					Ppp1r18	320.365	199.567	0.622936
					Sec24c	55.873	102.364	1.83209
					Sema4a	247.442	145.585	0.588361
					2410015M20Rik	118.862	206.186	1.73466
					Golga2	133.571	82.704	0.619176
					Rps25	2874.72	1639.69	0.570382
					Psme1	261.264	175.89	0.673226
					Setd8	265.31	152.108	0.573321
					Abracl	233.467	440.526	1.88689
					Psme2b	74.1243	132.323	1.78515
					Gm5963	375.963	248.771	0.661691
					Cisd1	64.5105	119.737	1.85608
					Ak2	217.644	125.704	0.577567
					Baz2b	147.218	90.7823	0.616651
					Chmp4b	1382.33	813.325	0.588374
					Nmt1	215.114	133.972	0.622795
					Eif3j2	105.212	52.4195	0.498229
					Riok3	225.939	138.847	0.614533
					Tspo	181.632	359.074	1.97693
					Rtfdc1	145.632	88.8345	0.609993
					Etfa	56.6803	128.624	2.26929
					Urm1	132.791	78.3023	0.589664
					Tle3	127.748	77.156	0.603973
					Fam120a	251.026	163.881	0.652845
					Acap2	97.0793	179.881	1.85293
					1810022K09Rik	128.132	249.155	1.94452
					Myd88	223.756	132.45	0.591939
					Ndufs4	80.3852	137.143	1.70607
					Trappc1	94.1692	171.242	1.81844
					Anxa2	6479.17	3516.63	0.542759
					Mcoln3	63.9635	144.147	2.25358
					Notch2	137.744	274.039	1.98949
					Tceb1	89.1243	212.673	2.38625
					Btf3	37.2215	100.874	2.71011
					Fabp4	414.801	824.474	1.98764
					Actn1	709.667	458.515	0.6461
					Btbd9	111.709	58.6937	0.525416
					Idh3g	124.589	71.8713	0.576866
					Ski	243.807	155.381	0.637312
					Uqcrq	236.194	386.341	1.63569
					Flna	1279.74	792.734	0.619448
					Rin3	138.066	74.8417	0.542072
					Spryd3	166.856	103.035	0.617505
					Cox8a	404.616	723.757	1.78875
					Ndufb2	62.88	137.723	2.19025
					Hr	140.192	55.107	0.393083
					Rnf10	387.003	208.84	0.539636
					Eny2	54.8798	108.391	1.97506
					Cebpa	949.655	424.294	0.446787
					Ndufab1	58.7945	108.346	1.84279
					Prpf19	101.828	167.939	1.64925
					Rnf6	124.893	68.9898	0.552392
					Bola2	300.871	481.058	1.59888
					Eml2	169.45	82.8272	0.488802
					Ddx24	250.138	143.72	0.574563
					Sec63	165.969	108.218	0.652041
					Ctsa	1471.02	910.432	0.618912
					Ctsl	241.813	466.905	1.93085
					Gnl1	111.117	71.3547	0.64216
					Selt	71.204	137.615	1.93269
					Huwe1	135.13	83.9672	0.62138
					Uqcrb	125.265	226.155	1.80541
					Cflar	285.801	139.805	0.489169
					Ear2	403.867	804.343	1.9916
					Srsf5	206.234	112.364	0.544835
					Gm6265	66.0482	125.685	1.90293
					Mdh2	334.986	214.394	0.640008
					Gak	170.421	111.085	0.651827
					Commd3	77.3135	128.626	1.66369
					Jagn1	134.629	77.5135	0.575757
					Taok3	167.863	98.0418	0.584059
					Nxf1	60.6423	115.251	1.9005
					Eif4h	189.764	325.144	1.71341
					Tagln2	3779.93	2201.14	0.582324
					Atrnl1	51.7375	121.013	2.33898
					Irf5	168.796	97.985	0.580493
					Lcp2	174.666	96.9032	0.554793
					Fam21	113.781	76.5853	0.673096
					Msn	886.571	562.048	0.633957
					Acin1	119.561	72.077	0.602847
					Rpl22	534.312	906.746	1.69703
					Mpdu1	308.412	189.464	0.614319
					S100a10	397.689	697.102	1.75288
					Pdia6	224.986	350.409	1.55747
					Srp14	218.988	354.221	1.61753
					Rps27	565.995	967.519	1.70941
					Wfdc21	1265.55	2692.78	2.12775
					Fam105a	81.559	168.736	2.06888
					Becn1	153.301	102.215	0.666757
					Stom	112.219	69.7493	0.621547
					Ctsc	535.654	968.795	1.80862
					Slc38a1	153.01	102.446	0.669536
					Ppp3r1	430.996	267.091	0.619706
					Uba1	253.979	168.995	0.665388
					Psmd13	285.211	181.33	0.635776
					Ptms	460.407	296.436	0.643856
					Nfkbib	180.343	92.9385	0.515343
					Cnih4	82.2283	139.442	1.6958
					Dohh	115.069	66.4813	0.577754
					Mkks	62.6295	120.008	1.91616
					Spag9	119.763	73.4103	0.612964
					Srxn1	177.375	106.215	0.598819
					Ufc1	80.0748	136.889	1.70952
					Dync1h1	221.868	143.586	0.647166
					Snord89	114.767	25.3795	0.221139
					Ndufc1	120.496	213.334	1.77046
					AI662270	115.167	68.2127	0.592296
					Rab11fip1	105.823	57.5953	0.544262
					Iqgap1	2463.99	1576.62	0.639864
					Atp6v0d2	641.176	1117.01	1.74213
					Atp13a2	91.7722	150.911	1.64441
					Stk38	210.867	123.378	0.585097
					Erp29	149.801	232.663	1.55314
					Eif3i	165.833	249.759	1.50609
					Zbtb22	108.102	65.9015	0.609623
					Prkaca	209.76	126.249	0.601875
					Cln5	257.807	166.848	0.647182
					Ets2	209.028	70.0675	0.335206
					Azin1	74.8785	120.858	1.61405
					Atp5g2	54.2165	118.185	2.17987
					Uhmk1	94.761	158.456	1.67216
					Smarcc2	225.85	113.619	0.503073
					Ly75	360.636	227.89	0.631911
					Fbxl14	87.4762	198.706	2.27154
					Pttg1	101.198	66.7843	0.659936
					2310047M10Rik	173.279	106.906	0.61696
					Ppm1a	165.066	107.281	0.649929
					Vat1	491.273	318.76	0.648844
					Unc119	322.051	212.856	0.66094
					Vasp	1444.57	852.315	0.590013
					Rps2	158.564	278.992	1.75949
					Wasf2	127.307	83.9363	0.659322
					Bax	104.455	61.714	0.590818
					Flot2	170.77	109.984	0.644046
					Rpl39	1114.54	2013.32	1.80642
					Setd5	205.912	125.631	0.610121
					Pla2g16	75.2177	140.384	1.86637
					Kctd10	109.125	70.8383	0.649148
					Spn	50.7165	102.928	2.02947
					Gng5	104.076	197.759	1.90014
					Cd274	177.192	83.7225	0.472496
					Rcc2	129.407	79.3332	0.613052
					Pdia3	908.644	469.692	0.516916
					Slc7a5	238.205	129.714	0.544548
					Ctsk	769.175	1601.02	2.08147
					Acaa1b	424.653	201.548	0.474619
					Pltp	105.527	54.6453	0.517833
					Hmgcs1	121.603	195.24	1.60555
					Ndufv2	84.6925	141.938	1.67592
					Slc38a10	219.766	148.936	0.677705
					2310011J03Rik	124.128	79.869	0.643438
					Plec	591.832	361.81	0.611339
					Glyr1	228.673	421.75	1.84434
					Sirt2	359.034	254.216	0.708056
					Krtcap2	232.146	364.04	1.56815
					Axl	804.608	535.335	0.665337
					Capn1	232.826	125.019	0.536966
					D8Ertd738e	93.9743	152.251	1.62014
					Rsl1d1	217.382	143.765	0.661347
					Anapc5	164.992	108.383	0.656901
					Cltc	442.226	302.2	0.683362
					Ppp1r9b	163.647	109.772	0.670788
					Hsdl1	104.534	173.172	1.65661
					Skil	156.51	95.0877	0.60755
					Rassf5	123.028	80.279	0.652528
					Lmnb1	356.356	120.545	0.338272
					Exosc5	114.504	77.658	0.678209
					Npepps	113.257	75.5408	0.666985
					Eif3h	364.396	231.617	0.635618
					Lcp1	1418.62	933.536	0.658061
					Atp6v1g1	170.647	283.683	1.6624
					Adrbk1	294.092	211.121	0.717874
					Actl6a	129.446	88.7215	0.685397
					Kpnb1	103.044	178.52	1.73246
					Pcnxl3	139.145	58.6095	0.42121
					4930506M07Rik	321.407	202.121	0.628865
					Rpl27	871.094	1414.93	1.62432
					Apoa1bp	110.605	74.317	0.671915
					Cd300lf	1235.45	603.716	0.488659
					Klf13	465.657	314.341	0.675048
					Ncln	291.674	188.199	0.645238
					Zbtb7a	550.256	373.031	0.677922
					Sdhc	143.051	229.918	1.60725
					Cox5b	146.29	224.687	1.5359
					Gm22710	536.368	220.795	0.411649
					Diap2	254.609	160.404	0.63
					Cpt1a	177.609	289.534	1.63018
					Tcp1	99.2215	162.766	1.64044
					Pip4k2c	129.26	86.2095	0.666949
					Psma1	103.848	169.532	1.6325
					Rabl6	105.553	64.2618	0.608813
					Crip1	190.854	444.356	2.32825
					Hebp1	190.632	332.228	1.74278
					Slc12a7	121.543	80.6855	0.663842
					Rab8a	353.186	234.053	0.662688
					1810037I17Rik	299.657	600.125	2.00271
					Pik3cd	166.571	99.7103	0.598606
					Gatad2a	124.996	87.409	0.699292
					Pea15a	116.842	77.6538	0.664605
					Syk	554.614	353.507	0.637392
					Stk24	388.366	258.469	0.665528
					Jak2	112.384	59.7275	0.531459
					Ifrd1	965.206	497.192	0.515115
					Cox14	103.073	154.276	1.49676
					Shfm1	740.105	1281.83	1.73196
					Mapkapk3	197.731	128.539	0.650072
					Rpl14	490.28	320.676	0.654067
					Tnfrsf21	231.653	140.975	0.608562
					Uxs1	182.64	116.469	0.637693
					D17Wsu92e	378.502	268.544	0.709492
					Cox7b	283.428	455.24	1.60619
					Ctbp1	221.145	156.06	0.705692
					Cd200r4	70.3155	112.036	1.59333
					Map2k3	268.438	183.068	0.681974
					Ctss	4608.74	8404.72	1.82365
					Vps72	129.037	67.3398	0.521864
					Zfp36	202.57	90.0775	0.444673
					Mgat4b	288.297	201.211	0.697929
					Atf6b	167.546	112.672	0.672485
					Rbms1	548.707	390.71	0.712056
					Dynll1	59.6213	101.496	1.70234
					Rnf7	61.403	108.941	1.7742
					Fn1	566.618	995.266	1.7565
					Rpn2	176.906	271.561	1.53506
					Coro1a	325.871	191.813	0.588618
					Ube2z	162.04	248.038	1.53072
					Yeats4	179.723	126.788	0.705464
					Rbx1	70.8153	112.973	1.59532
					Kmt2e	162.641	116.695	0.717503
					Junb	496.691	230.738	0.464551
					Eif3e	85.811	153.084	1.78396
					Ube2d3	332.213	223.772	0.67358
					Capns1	408.204	293.616	0.719287
					Gcnt2	130.196	210.704	1.61837
					Rpl36	231.287	383.03	1.65608
					Sap30l	102.659	65.4073	0.63713
					Bak1	121.817	85.156	0.69905
					Txn1	1808.15	3087.14	1.70735
					Rnf220	126.828	86.638	0.683115
					Snx5	524.27	339.227	0.647046
					Plaur	152.549	83.5445	0.547657
					Pim3	127.514	73.3893	0.575537
					Prcp	158.71	105.336	0.6637
					Abhd12	1078.97	699.012	0.647852
					Csnk1g2	246.611	172.925	0.701204
					Dnajb11	66.724	116.882	1.75172
					Aff1	105.231	69.0182	0.655877
					Rmnd5a	64.9022	121.716	1.87537
					Ppp3ca	199.295	305.564	1.53323
					Csde1	469.418	332.087	0.707443
					Mpeg1	866.298	1404.45	1.62121
					Gsk3b	154.324	101.886	0.660211
					2510009E07Rik	57.2137	101.169	1.76827
					Rps28	1404.56	2203.22	1.56862
					Ndufa3	226.322	333.253	1.47247
					Jup	215.304	109.32	0.507747
					Slirp	124.899	187.145	1.49837
					Supt6	108.789	71.3102	0.655493
					Ccdc115	218.702	153.524	0.701979
					Fam168b	118.734	177.588	1.49568
					Ccnl1	110.031	67.4378	0.612895
					Gabarap	2105.88	1420.45	0.674515
					Tubb4b	59.2332	100.536	1.69729
					Uqcrfs1	287.255	453.607	1.57911
					Snd1	118.877	82.227	0.691695
					Znfx1	65.1755	101.906	1.56357
					Rps18	356.965	526.714	1.47553
					Cmip	216.38	152.969	0.706947
					Pik3r1	111.552	71.0685	0.637087
					Ndufb5	133.229	205.394	1.54165
					Pafah1b1	221.397	326.743	1.47582
					Tonsl	439.23	305.096	0.694615
					Phb2	325.647	234.051	0.718726
					Brd4	148.79	96.6128	0.649322
					Tapbp	526.427	352.986	0.670532
					Atf5	183.983	105.558	0.573736
					Rsrp1	105.888	196.281	1.85366
					Mapkapk2	854.339	520.654	0.609423
					Pigt	271.427	156.043	0.574901
					Id2	266.579	174.087	0.65304
					Scap	182.36	119.66	0.656175
					Cic	115.311	80.1245	0.694857
					Isg15	288.971	119.329	0.412943
					Cpne5	111.409	65.181	0.585059
					Stk17b	86.7027	141.221	1.6288
					Hpcal1	450.718	277.776	0.616297
					Pbxip1	240.963	162.841	0.675793
					Actn4	250.431	177.768	0.709849
					Cct2	134.402	200.622	1.49269
					Tnfaip2	1528.72	938.758	0.614083
					Ccnd2	1860.31	1013.14	0.54461
					Fam96a	91.893	144.222	1.56946
					Copb2	102.937	71.7043	0.696584
					9130401M01Rik	83.8695	133.103	1.58703
					Rab1	242.9	377.594	1.55453
					Arhgef7	109.993	66.665	0.606087
					Hsp90ab1	1697.95	1021.62	0.601675
					Pex11a	325.763	203.045	0.62329
					Mbnl2	109.286	68.5233	0.62701
					Ap3d1	137.018	206.358	1.50606
					Magt1	85.654	133.549	1.55917
					Fam129a	246.712	151.936	0.615843
					BC031181	99.8815	143.81	1.4398
					Chmp1a	230.286	158.83	0.689705
					Tnip1	275.8	136.693	0.495622
					Tmx1	171.856	243.902	1.41922
					Nr4a1	215.039	70.3642	0.327217
					Cops5	149.804	104.669	0.698703
					AI413582	122.187	82.7495	0.677238
					Mxd1	233.518	66.6553	0.28544
					Tgfbr2	137.444	231.34	1.68317
					Fbxl5	113.835	179.393	1.5759
					Pqlc3	61.761	115.654	1.87261
					Rpl23	980.488	1635.19	1.66773
					Klc1	225.983	144.212	0.638155
					H2-K1	1569.84	1005.34	0.640411
					Psmc1	237.986	156.585	0.657959
					Bsg	268.429	199.52	0.743288
					Rbm17	81.4315	147.119	1.80666
					Ms4a6d	211.407	326.26	1.54328
					Eif5b	269.144	198.039	0.735811
					Tpp2	67.9047	115.733	1.70434
					Hdgf	344.645	239.028	0.693548
					Nucb1	74.154	112.079	1.51144
					Itgax	977.618	631.208	0.64566
					Rpl31	962.326	1536.57	1.59672
					Pfkfb4	172.41	126.002	0.730827
					Actr1b	119.198	81.594	0.684523
					Arl8b	110.824	166.068	1.49849
					Tsc22d4	103.231	69.3533	0.671829
					Naaa	290.851	479.946	1.65014
					Rpl36a	1234.06	2047.15	1.65887
					Fkbp2	144.917	227.007	1.56646
					Zfp703	199.577	118.369	0.593099
					Saraf	326.706	236.792	0.724785
					Vapb	346.01	242.571	0.701051
					Ddb1	568.413	409.919	0.721165
					Mmp8	69.414	141.066	2.03223
					Ndufb3	227.744	380.267	1.66971
					Ear1	1200.25	701.42	0.584393
					Ndufb9	137.862	205.227	1.48864
					Nop58	98.7318	153.018	1.54983
					Elovl1	158.145	110.727	0.700161
					Trib1	192.613	93.1015	0.483361
					Tkt	659.673	427.929	0.648699
					Tnf	100.154	44.8855	0.448166
					Skiv2l	67.175	109.61	1.63171
					Slc7a1	105.091	63.6963	0.606106
					Tardbp	69.624	116.187	1.66878
					Smarcd2	120.585	82.9507	0.687903
					Hyou1	110.123	61.653	0.559855
					Hmox1	144.613	92.33	0.638465
					Atp6v1f	1002.71	697.605	0.695717
					Rpl9	318.808	468.36	1.4691
					Psmb4	237.124	350.53	1.47825
					Rpl13a	690.875	1062.51	1.53792
					Sec22b	113.38	81.8347	0.721774
					Polr2g	68.1825	106.8	1.56638
					Sdf4	189.889	140.328	0.739001
					Rsu1	97.1637	147.202	1.51499
					Cox6b1	635.028	959.323	1.51068
					Pmepa1	195.152	124.531	0.638123
					Polr2a	183.985	135.718	0.737658
					Rnh1	1358.49	963.104	0.708952
					Ccnk	123.507	187.89	1.52128
					Qsox1	937.338	593.054	0.6327
					Nagpa	196.077	143.553	0.732123
					Irf8	136.845	94.2043	0.6884
					Hnrnpl	170	115.993	0.682309
					Grpel1	204.963	134.861	0.657976
					Card11	105.246	74.0393	0.703484
					Adam17	537.158	346.401	0.644876
					Lima1	766.382	482.322	0.62935
					Vcp	303.67	201.746	0.664358
					Srp9	75.3915	135.214	1.7935
					Hsd3b7	127.526	199.363	1.56332
					Ncor2	179.81	119.48	0.664477
					Rpl22l1	75.794	124.903	1.64793
					Mertk	372.732	245.469	0.658566
					C77080	69.336	117.477	1.69431
					Stk10	112.688	196.316	1.74212
					Purb	312.487	227.607	0.728372
					Mtdh	563.66	376.7	0.66831
					Calm2	177.257	264.63	1.49291
					Eif1ax	83.7302	124.85	1.4911
					Sqstm1	718.443	492.596	0.685644
					Swi5	278.007	182.842	0.657687
					Rpl37	1998.91	3192.47	1.59711
					Tpd52l2	73.4335	112.192	1.5278
					Fnta	129.529	185.767	1.43417
					Mapre1	334.756	243.106	0.726218
					Stat6	118.912	86.2168	0.725045
					Plek	1440.86	842.166	0.584487
					Isoc2a	389.956	266.521	0.683464
					Slc39a11	151.725	102.372	0.67472
					Chmp2a	200.119	305.707	1.52763
					Sae1	259.555	170.529	0.657005
					Atp6ap1	1032.82	739.854	0.716344
					Emd	195.461	137.938	0.705705
					Mfsd12	230.37	155.506	0.675025
					Pfkfb3	121.651	69.7347	0.573234
					Srp19	71.01	108.787	1.532
					Nabp1	165.946	270.986	1.63298
					Hck	593.209	377.3	0.636033
					Mpc2	124.069	206.648	1.6656
					Lhfpl2	74.8858	117.014	1.56257
					Rtcb	141.653	106.491	0.751777
					S100a11	526.694	355.828	0.675589
					Tm9sf4	166.801	99.8113	0.598383
					Irf1	175.645	96.873	0.551528
					Actb	13132.1	8168.34	0.622014
					Pim1	345.244	188.928	0.547232
					Atg3	77.5182	120.816	1.55854
					Cux1	102.123	69.7583	0.683084
					Atxn1	157.713	112.208	0.711471
					Rrs1	67.8377	124.041	1.8285
					P2ry14	408.208	276.199	0.676613
					Itpr2	208.002	146.86	0.706051
					Nfkb2	108.002	61.904	0.573177
					Cbfb	115.107	168.185	1.46112
					Bcl2a1d	171.973	348.869	2.02863
					Anp32a	156.504	98.0652	0.6266
					Naca	150.72	249.178	1.65325
					Rpl3	769.672	1135.6	1.47543
					Higd2a	136.042	103.348	0.759679
					Taok1	149.71	107.556	0.718425
					Crlf2	302.333	231.664	0.766253
					Atp6v1e1	520.16	383.972	0.73818
					Batf	108.378	70.3402	0.649027
					Tnfrsf1b	243.474	156.392	0.642336
					Rab5c	2786.89	1879.19	0.674296
					Mgst1	186.462	296.938	1.59248
					Hsbp1	108.52	163.421	1.5059
					Acaa1a	199.452	149.602	0.750062
					Lamtor1	288.989	187.481	0.648748
					43723	117.525	193.165	1.64361
					Sumo3	320.005	227.206	0.710007
					Gtf2h5	120.656	173.722	1.43981
					Tuba1c	561.35	387.354	0.690041
					Cotl1	4070.33	2796.34	0.687006
					Rps7	415.427	626.109	1.50715
					Snrpb2	160.268	117.006	0.730067
					Lrp10	173.302	123.77	0.714187
					St13	299.835	226.228	0.754506
					Sec11a	97.3817	141.365	1.45166
					Rps29	1772.04	1236.54	0.697808
					Pebp1	91.1192	132.844	1.45791
					Myl12b	259.955	185.209	0.712467
					Sidt2	125.326	94.0933	0.750785
					Ergic1	150.084	108.459	0.722651
					Rpl18	225.567	323.747	1.43526
					Tnfaip8	152.778	108.504	0.710206
					Ndufb10	100.837	155.438	1.54147
					Ifitm2	130.598	56.3528	0.431497
					Cox7c	225.274	319.103	1.41651
					Rplp0	704.875	1022.74	1.45095
					Rplp2	993.263	1451.28	1.46113
					Fam49b	316.121	220.394	0.697182
					Itpripl2	316.854	230.321	0.7269
					Psmb5	161.65	225.005	1.39193
					Gba	126.009	181.66	1.44164
					Gab2	262.672	178.617	0.68
					Gar1	73.5457	114.211	1.55292
					Esrra	81.7627	119.431	1.4607
					Ddost	176.872	133.481	0.754677
					Zfp770	14.7745	7.835	0.530306
					Usp14	139.339	105.662	0.758309
					Eif4b	104.297	149.428	1.43272
					Ndufa6	214.606	307.828	1.43439
					Hvcn1	246.763	361.71	1.46582
					Mbnl1	255.685	192.972	0.754727
					Ehbp1l1	152.985	115.097	0.752341
					H2-DMb1	695.379	481.517	0.692452
					Bhlhe40	134.375	90.1515	0.670895
					Actr10	145.373	112.326	0.772676
					Arl2bp	99.1532	169.349	1.70795
					Gas5	236.435	347.968	1.47173
					Pgrmc2	117.022	84.8245	0.724856
					Abhd16a	127.401	92.4903	0.725977
					Tyrobp	1656.32	2449.06	1.47861
					Chtf8	202.05	125.801	0.622623
					Cdc42ep3	98.8893	166.85	1.68724
					Mgat1	225.685	176.601	0.782509
					Ufd1l	104.358	80.2295	0.768793
					Ddx50	66.806	102.05	1.52756
					Atp6v0a1	133.051	92.0433	0.691789
					Mob1a	184.415	288.951	1.56685
					Mdm2	134.821	96.5247	0.715946
					Atp6ap2	649.543	490.394	0.754984
					Gpcpd1	184.247	299.127	1.62351
					Hsd17b4	91.7097	142.918	1.55837
					H2-Eb1	810.211	445.362	0.549686
					Col4a3bp	90.2825	127.375	1.41084
					Psmd6	78.2668	112.242	1.4341
					Stx6	137.982	105.757	0.76645
					Arhgap1	106.237	74.986	0.70584
					Sp1	137.627	102.475	0.744586
					Snrnp70	329.282	459.4	1.39515
					Ddx6	485.125	349.065	0.719535
					Ubb	284.471	210.377	0.739538
					Fam32a	119.474	80.4485	0.673356
					Coro1c	700.299	1025.91	1.46495
					Gp49a	177.939	111.163	0.62473
					Higd1a	97.3482	136.446	1.40163
					Sec61a1	650.218	477.41	0.734231
					Ppig	121.973	86.1172	0.706035
					Atp10a	141.138	99.1905	0.70279
					Ythdf3	101.323	75.049	0.740692
					Pdcd6	77.6308	115.704	1.49044
					Hdc	373.147	74.67	0.200109
					Acads	209.739	158.501	0.755705
					Rab31	124.199	93.5695	0.753385
					Jak1	264.956	203.226	0.76702
					Csf1r	370.984	253.803	0.684136
					Wipf1	97.869	132.978	1.35874
					Ndufc2	132.494	188.688	1.42413
					Smdt1	167.662	234.452	1.39836
					Edf1	182.304	132.025	0.724205
					Soat1	72.0508	102.439	1.42177
					Ier3	728.099	262.386	0.360372
					Mgrn1	112.565	86.2608	0.766319
					Ccl9	1044.24	520.549	0.498497
					Marco	1334.49	2384.62	1.78691
					Rps24	2695.03	1821.55	0.675893
					Ube2j2	124.118	95.4897	0.769345
					Pcbp1	190.016	258.006	1.35781
					Ssbp4	147.496	104.183	0.706346
					Zranb2	75.8265	107.025	1.41145
					2310036O22Rik	160.476	121.184	0.755154
					Hspa4	188.404	283.267	1.50351
					Vav1	166.212	229.004	1.37778
					Rnf13	70.312	107.936	1.5351
					Eef2	2514.79	1797.83	0.714902
					Rpl12	334.596	468.552	1.40035
					Kdelr2	68.8417	102.008	1.48178
					Tmem189	69.55	103.614	1.48978
					Anxa4	340.292	259.685	0.763125
					Fth1	11275.4	19108.9	1.69473
					Ewsr1	107.425	167.154	1.55601
					Snrpf	78.4555	140.78	1.79439
					Emc7	122.767	186.745	1.52114
					Ncor1	152.204	107.189	0.704242
					Dstn	264.475	180.534	0.682615
					Fas	252.566	140.337	0.555645
					Canx	339.544	463.361	1.36466
					Per1	202.036	116.518	0.576722
					Bub1b	165.379	113.238	0.68472
					Tmem109	129.69	99.5855	0.767876
					Rps20	1944.48	1409.43	0.724836
					Sptlc2	116.305	160.726	1.38194
					Tmbim6	1200.64	879.357	0.732408
					Hexa	505.064	721.332	1.4282
					Cwc15	255.088	196.041	0.768525
					Hnrnpa0	617.525	477.754	0.773659
					Abcf1	129.946	101.331	0.77979
					Zfp706	111.411	153.697	1.37955
					Bud31	103.642	77.4537	0.747324
					Ankrd11	158.858	109.338	0.688273
					Atp5c1	76.223	109.769	1.44011
					Ccdc88a	260.093	179.576	0.690429
					Wbp11	68.7905	100.687	1.46368
					Cd24a	141.741	229.755	1.62094
					Nampt	432.411	304.702	0.704657
					Hsd17b11	277.601	399.691	1.4398
					Aamp	282.631	215.803	0.763549
					Mllt6	190.865	114.694	0.600918
					Hnrnpul2	221.794	160.687	0.724488
					Creg1	580.703	441.134	0.759655
					Pa2g4	192.208	148.03	0.770156
					Tcirg1	151.62	213.677	1.40929
					Arpc5l	88.3065	119.551	1.35382
					2010107E04Rik	354.817	494.616	1.394
					B4galnt1	132.184	182.45	1.38027
					Man2a1	99.2185	153.1	1.54306
					Dynlt3	117.459	89.4675	0.761688
					Trem1	375.303	197.374	0.525905
					Nfe2l2	137.114	108.048	0.788015
					Adam15	146.558	104.953	0.716116
					Mfsd7c	97.6232	150.269	1.53927
					Cib2	106.178	71.385	0.672314
					Prdx2	118.269	159.062	1.34492
					Tmcc3	145.475	113.821	0.78241
					Malsu1	80.6808	124.057	1.53763
					Dock10	258.875	189.283	0.731177
					Fermt3	126.305	93.3985	0.739465
					Arhgap30	183.503	138.558	0.755068
					E430025E21Rik	85.0285	118.217	1.39032
					Ddx21	246.834	178.385	0.722696
					Srsf7	82.3923	113.839	1.38167
					Ppt2	123.085	163.888	1.3315
					Qdpr	144.287	199.573	1.38317
					Cox7a2l	107.678	77.3247	0.718111
					Clec5a	98.7338	151.427	1.53369
					Nckap1l	232.208	181.252	0.78056
					Srsf3	185.111	258.962	1.39896
					Slc7a2	1482.48	966.836	0.652173
					Fau	712.713	962.464	1.35042
					Pld3	953.688	717.668	0.752519
					H2-Ab1	1750.08	1066.05	0.609144
					Rock1	175.232	138.294	0.789207
					Tmem86a	204.806	155.817	0.760801
					Far1	96.9385	135.397	1.39673
					Sdha	157.129	212.793	1.35426
					Pkm	569.259	448.851	0.788484
					Lgals3bp	177.819	259.866	1.46141
					Sub1	235.004	305.964	1.30195
					Cybb	2186.9	1600.81	0.732001
					Cers2	206.119	158.225	0.767638
					Grn	910.191	675.668	0.742336
					Fgr	403.207	292.225	0.724753
					Zcchc2	79.0035	113.797	1.44041
					Picalm	837.72	638.201	0.761831
					Ufsp2	112.623	155.739	1.38284
					Arhgdia	402.255	316.787	0.787527
					Cct8	217.688	293.285	1.34727
					Ddx3x	385.718	281.781	0.730536
					Hdlbp	148.744	112.331	0.755197

[truncated: 10 more sheets: 6A4 M vs KO M, 6A4 F vs KO F, 1A0 M vs 6A2 M, 1A0 F vs 6A2 F, 1A0 M vs 6A4 M, 1A0 F vs 6A4 F, 1A3 M vs 6A2 M, 1A3 F vs 6A2 F, 1A3 M vs 6A4 M, 1A3 F vs 6A4 F]
